# Supplementary material for: Universal Capacitance Model for Real-Time Biomass in Cell Culture
Source: Sensors (Basel). 2015 Sep 2;15(9):22128–50. doi: 10.3390/s150922128 (PMC4610510; doi:10.3390/s150922128)
Supplement: Supplementary File 1 [file sensors-15-22128-s001.xlsx]

## Sheet: Instructions
Universal PLS Model calculation sheet
by Viktor Konakovsky
© 2015, The Authors, Vienna University of Technology
Quick Introduction
1) Select a PLS model from the sheet 'PLS models'
2) Copy-paste a model in the sheet 'Models in use'
3) View performance of the model in different runs (A, B, C, D)
4) Note the cells AV/AW and CA/CB in test and validation runs to calculate k which enables model transfer
5) External data (t, VCC, capacitance) may be used, but formula & plot ranges and k must be updated
6) The sheets for 'Heatmap' may help to select a frequency range for the given data set(s)

## Sheet: PLS models
		Origin	Intercept	1	2	3	4	5	6	7	8	9	10	11	12	13	14	15	16	17	Modelname	Centering
				FQ300kHz	FQ373kHz	FQ465kHz	FQ578kHz	FQ720kHz	FQ897kHz	FQ1117kHz	FQ1391kHz	FQ1732kHz	FQ2156kHz	FQ2684kHz	FQ3342kHz	FQ4161kHz	FQ5181kHz	FQ6451kHz	FQ8031kHz	FQ10000kHz
Clone A		Clone A models	-12.06	-4.24	2.75	4.29	2.48	1.4	-1.42	-1.17	0	-4.23	-2.75	-2.16	0	2.74	0	4.34	-3.89	0	MLR	Mean
		Clone A models	-4.52	1.23	0	0	0	0	0	0	0	0	0	0	0	0	0	0	4.48	0	VIF MLR	Mean
		Clone A models	-6.4765	-3.23536	1.40344	2.41745	3.20028	2.14384	0.69674	-0.572725	-1.56764	-1.96778	-2.0971	-2.18412	-1.42836	-0.525178	-0.967649	-0.449252	-0.152705	0.0790367	MCAFQ1:17	Mean					SD	SD	MC	MC
		Clone A models	-6.475	-3.23298	1.40148	2.41534	3.19782	2.14311	0.697982	-0.569962	-1.56387	-1.96383	-2.09339	-2.18065	-1.42623	-0.524545	-0.966428	-0.448853	-0.152729	0	MCAFQ1:16	Mean					CHO158	CHO209	CHO158MC	CHO209MC
		Clone A models	-6.4885	-3.23279	1.4048	2.41876	3.19981	2.14239	0.69433	-0.576083	-1.57167	-1.97229	-2.10184	-2.1886	-1.43322	-0.530581	-0.97124	-0.452795	0	0	MCAFQ1:15	Mean
		Clone A models	-6.5181	-3.24278	1.41864	2.43476	3.21382	2.14419	0.68227	-0.599624	-1.60315	-2.0064	-2.13562	-2.22064	-1.4589	-0.549424	-0.988406	0	0	0	MCAFQ1:14	Mean			FQ10000kHz	FQ1:17
		Clone A models	-6.584	-3.29066	1.45615	2.48255	3.26263	2.15747	0.653904	-0.662547	-1.69039	-2.10143	-2.22976	-2.31063	-1.52777	-0.595047	0	0	0	0	MCAFQ1:13	Mean			FQ8031kHz	FQ1:16
		Clone A models	-6.5777	-3.28815	1.48472	2.50873	3.27636	2.14682	0.617782	-0.719124	-1.7601	-2.17494	-2.30125	-2.3766	-1.58315	0	0	0	0	0	MCAFQ1:12	Mean			FQ6451kHz	FQ1:15
		Clone A models	-6.5994	-3.3716	1.58114	2.61701	3.37173	2.1497	0.516844	-0.904421	-2.00248	-2.43365	-2.55396	-2.61407	0	0	0	0	0	0	MCAFQ1:11	Mean			FQ5181kHz	FQ1:14
		Clone A models	-6.6395	-3.67591	1.80027	2.89014	3.64587	2.19758	0.303095	-1.33233	-2.57819	-3.0523	-3.16025	0	0	0	0	0	0	0	MCAFQ1:10	Mean			FQ4161kHz	FQ1:13
		Clone A models	-6.5712	-4.02129	2.13281	3.25612	3.96126	2.15694	-0.133655	-2.08712	-3.54456	-4.0725	0	0	0	0	0	0	0	0	MCAFQ1:9	Mean			FQ3342kHz	FQ1:12
		Clone A models	-6.3788	-4.58081	2.72392	3.85948	4.41923	1.93747	-1.09094	-3.62911	-5.46581	0	0	0	0	0	0	0	0	0	MCAFQ1:8	Mean			FQ2684kHz	FQ1:11
		Clone A models	-5.9899	-5.63158	3.90624	4.95632	5.08618	1.10802	-3.51507	-7.2994	0	0	0	0	0	0	0	0	0	0	MCAFQ1:7	Mean			FQ2156kHz	FQ1:10
		Clone A models	-5.3655	-7.45822	6.37892	6.84034	5.55259	-2.02693	-10.369	0	0	0	0	0	0	0	0	0	0	0	MCAFQ1:6	Mean			FQ1732kHz	FQ1:9
		Clone A models	-4.3516	-11.0405	12.4094	9.91324	3.16018	-15.2756	0	0	0	0	0	0	0	0	0	0	0	0	MCAFQ1:5	Mean			FQ1391kHz	FQ1:8
		Clone A models	-4.3026	-0.49443	0.674869	0.837226	0.908875	0	0	0	0	0	0	0	0	0	0	0	0	0	MCAFQ1:4	Mean			FQ1117kHz	FQ1:7
		Clone A models	-4.2133	-1.22392	1.34364	1.79873	0	0	0	0	0	0	0	0	0	0	0	0	0	0	MCAFQ1:3	Mean			FQ897kHz	FQ1:6
		Clone A models	-4.9797	0.715197	0.625022	0	0	0	0	0	0	0	0	0	0	0	0	0	0	0	MCAFQ1:2	Mean			FQ720kHz	FQ1:5
		Clone A models	-4.5751	1.24674	0	0	0	0	0	0	0	0	0	0	0	0	0	0	0	0	MCAFQ1:1	Mean			FQ578kHz	FQ1:4
		Clone A models	-8.5229	0.147905	0.465643	0.644742	0.923533	0.979246	0.825717	0.438649	-0.296643	-1.19362	-2.43087	-4.58459	-3.93017	0.660858	-7.34279	-0.823379	7.11462	22.0361	SCAFQ1:17	Standardization			FQ465kHz	FQ1:3
		Clone A models	-7.9573	-0.0987413	0.423692	0.706768	1.18428	1.30386	1.11317	0.592775	-0.443285	-1.64846	-3.3254	-6.48298	-4.5165	4.48783	-8.40802	4.30912	19.7448	0	SCAFQ1:16	Standardization			FQ373kHz	FQ1:2
		Clone A models	-6.7635	-0.479051	0.325959	0.757077	1.51949	1.75045	1.54907	0.90707	-0.456618	-1.97269	-4.11741	-8.48646	-4.55567	10.6254	-8.66355	12.6835	0	0	SCAFQ1:15	Standardization			FQ300kHz	FQ1:1
		Clone A models	-5.7649	-0.736584	0.217093	0.732977	1.65897	1.97954	1.82582	1.19935	-0.227655	-1.77155	-4.00735	-8.83867	-3.78159	14.5521	-7.71865	0	0	0	SCAFQ1:14	Standardization
		Clone A models	-6.3508	-0.760479	0.231047	0.769282	1.7292	2.05595	1.87907	1.19095	-0.358119	-2.07506	-4.58769	-9.89752	-5.10984	13.2562	0	0	0	0	SCAFQ1:13	Standardization
		Clone A models	-6.5502	-1.3771	-0.0911264	0.627539	1.92951	2.48397	2.49251	1.978	0.51025	-0.987345	-3.3232	-9.05255	-1.66169	0	0	0	0	0	SCAFQ1:12	Standardization
		Clone A models	-6.6927	-1.34864	-0.0731434	0.651628	1.9369	2.48757	2.48858	1.94757	0.429734	-1.18681	-3.73426	-9.73444	0	0	0	0	0	0	SCAFQ1:11	Standardization
		Clone A models	-7.067	-1.81623	-0.0741351	0.89346	2.5832	3.19175	2.92965	1.75751	-0.966924	-4.1048	-8.88457	0	0	0	0	0	0	0	SCAFQ1:10	Standardization
		Clone A models	-7.1331	-2.15787	0.0407017	1.22872	3.24058	3.75917	2.97442	0.755773	-3.78186	-9.29565	0	0	0	0	0	0	0	0	SCAFQ1:9	Standardization
		Clone A models	-6.9864	-2.63788	0.298222	1.80067	4.22541	4.37322	2.34978	-2.17443	-10.529	0	0	0	0	0	0	0	0	0	SCAFQ1:8	Standardization
		Clone A models	-6.5758	-3.61056	0.907541	2.9723	6.0197	4.80996	-0.850672	-11.8426	0	0	0	0	0	0	0	0	0	0	SCAFQ1:7	Standardization
		Clone A models	-5.9102	-5.32543	2.49167	5.32355	8.62874	2.39861	-14.6874	0	0	0	0	0	0	0	0	0	0	0	SCAFQ1:6	Standardization
		Clone A models	-4.8292	-9.09124	7.40553	10.4231	9.80097	-19.3735	0	0	0	0	0	0	0	0	0	0	0	0	SCAFQ1:5	Standardization
		Clone A models	-4.3325	-0.321495	0.455465	0.741523	1.05128	0	0	0	0	0	0	0	0	0	0	0	0	0	SCAFQ1:4	Standardization
		Clone A models	-4.2493	-1.08814	1.02115	1.99322	0	0	0	0	0	0	0	0	0	0	0	0	0	0	SCAFQ1:3	Standardization
		Clone A models	-3.9555	-2.34312	4.16846	0	0	0	0	0	0	0	0	0	0	0	0	0	0	0	SCAFQ1:2	Standardization
		Clone A models	-4.5751	1.24674	0	0	0	0	0	0	0	0	0	0	0	0	0	0	0	0	SCAFQ1:1	Standardization
Clone B		Clone B models	-5.2	2.15	0	0	0	0	0	0	0	0	0	0	0	0	0	0	0	-6.5	VIF MLR	Mean
		Clone B models	-4.9363	0.117405	-1.25178	-0.235387	0.49041	1.28954	2.29715	2.7822	2.91174	2.09249	1.41162	0.198913	-0.499236	-1.61414	-2.26095	-2.92161	-3.58403	-3.91792	MCBFQ1:17	Mean
		Clone B models	-4.276	0.138766	-1.22202	-0.141594	0.565478	1.32576	2.30029	2.72981	2.80695	1.88097	1.12297	-0.197657	-0.927708	-2.12019	-2.79711	-3.48727	-4.18651	0	MCBFQ1:16	Mean
		Clone B models	-3.5713	0.164231	-1.12969	0.00453538	0.664112	1.34461	2.23833	2.57509	2.57591	1.53677	0.700294	-0.719581	-1.46783	-2.72226	-3.4155	-4.12057	0	0	MCBFQ1:15	Mean
		Clone B models	-2.9477	0.177643	-0.981801	0.193332	0.781128	1.34489	2.11206	2.32361	2.22896	1.08343	0.177046	-1.3187	-2.06669	-3.35599	-4.04681	0	0	0	MCBFQ1:14	Mean
		Clone B models	-2.3939	0.190478	-0.765494	0.425546	0.908935	1.31205	1.89975	1.95061	1.74119	0.50253	-0.460072	-1.9995	-2.72342	-4.01256	0	0	0	0	MCBFQ1:13	Mean
		Clone B models	-1.8879	0.219134	-0.455988	0.698694	1.031	1.21842	1.56096	1.41259	1.07139	-0.22772	-1.21748	-2.74375	-3.40711	0	0	0	0	0	MCBFQ1:12	Mean
		Clone B models	-1.6134	0.21665	-0.172526	0.955988	1.14466	1.12115	1.22232	0.876705	0.404253	-0.955201	-1.97187	-3.48484	0	0	0	0	0	0	MCBFQ1:11	Mean
		Clone B models	-1.2251	0.267991	0.193453	1.23575	1.22021	0.923512	0.72027	0.135694	-0.488564	-1.89887	-2.93052	0	0	0	0	0	0	0	MCBFQ1:10	Mean
		Clone B models	-0.9685	0.220809	0.443236	1.54149	1.34658	0.771847	0.271109	-0.595888	-1.42751	-3.04367	0	0	0	0	0	0	0	0	MCBFQ1:9	Mean
		Clone B models	-0.6098	0.073557	0.686639	1.99146	1.53888	0.536251	-0.401114	-1.73439	-2.92964	0	0	0	0	0	0	0	0	0	MCBFQ1:8	Mean
		Clone B models	-0.5292	-0.330548	0.926667	2.79315	1.90048	0.117204	-1.59395	-3.82576	0	0	0	0	0	0	0	0	0	0	MCBFQ1:7	Mean
		Clone B models	-0.3981	-1.05204	1.40679	4.38148	2.22325	-1.56461	-5.18795	0	0	0	0	0	0	0	0	0	0	0	MCBFQ1:6	Mean
		Clone B models	-0.3261	-2.25653	2.37335	7.60747	1.23787	-8.54003	0	0	0	0	0	0	0	0	0	0	0	0	MCBFQ1:5	Mean
		Clone B models	0.2966	-3.37975	3.51866	13.4073	-12.4515	0	0	0	0	0	0	0	0	0	0	0	0	0	MCBFQ1:4	Mean
		Clone B models	1.9321	0.128866	0.807347	1.57813	0	0	0	0	0	0	0	0	0	0	0	0	0	0	MCBFQ1:3	Mean
		Clone B models	1.6901	1.12425	0.963378	0	0	0	0	0	0	0	0	0	0	0	0	0	0	0	MCBFQ1:2	Mean
		Clone B models	1.653	1.94857	0	0	0	0	0	0	0	0	0	0	0	0	0	0	0	0	MCBFQ1:1	Mean
		Clone B models	-9.088	0.0678324	-0.106182	-0.186813	-0.230106	-0.152515	0.241747	1.00406	2.31251	3.62914	5.28994	5.53496	5.8321	3.01403	0.0916249	-4.76619	-11.0181	-16.5539	SCBFQ1:17	Standardization
		Clone B models	-8.6226	0.0592408	-0.194709	-0.318507	-0.397647	-0.312836	0.208195	1.22881	2.99412	4.66808	6.73723	6.614	6.5164	1.75798	-3.18839	-10.9721	-20.8251	0	SCBFQ1:16	Standardization
		Clone B models	-7.8238	0.0669291	-0.311545	-0.496956	-0.627571	-0.525547	0.204091	1.63178	4.10184	6.22074	8.72585	7.58727	6.37481	-2.2215	-11.1551	-24.4662	0	0	SCBFQ1:15	Standardization
		Clone B models	-6.8175	0.100968	-0.44092	-0.694471	-0.882819	-0.746501	0.279256	2.24898	5.62539	8.0918	10.7568	7.37569	3.67362	-11.6168	-27.4725	0	0	0	SCBFQ1:14	Standardization
		Clone B models	-5.6383	0.184449	-0.585291	-0.913219	-1.16947	-0.974213	0.485269	3.19329	7.7536	10.2382	12.3308	4.18581	-4.8352	-32.3377	0	0	0	0	SCBFQ1:13	Standardization
		Clone B models	-3.895	0.371559	-0.760272	-1.15938	-1.49756	-1.19021	0.993246	4.80569	11.015	12.3613	11.5846	-8.0851	-30.0305	0	0	0	0	0	SCBFQ1:12	Standardization
		Clone B models	-3.6952	0.51483	-0.95479	-1.30726	-1.64869	-1.17129	1.80436	6.57557	13.9296	11.8942	4.5365	-33.912	0	0	0	0	0	0	SCBFQ1:11	Standardization
		Clone B models	-2.0607	0.797191	-1.05167	-1.07311	-1.29665	-0.60231	3.30302	8.43878	15.1918	1.66468	-25.7126	0	0	0	0	0	0	0	SCBFQ1:10	Standardization
		Clone B models	-1.4302	0.543077	-0.727424	-0.0841334	0.105823	0.771826	3.76873	6.13521	7.21039	-18.0026	0	0	0	0	0	0	0	0	SCBFQ1:9	Standardization
		Clone B models	-0.5835	0.428723	0.270746	1.03362	1.31201	1.33314	1.54451	-0.425217	-5.84967	0	0	0	0	0	0	0	0	0	SCBFQ1:8	Standardization
		Clone B models	-0.571	0.175102	0.399089	1.6859	2.05884	1.52782	0.0990135	-6.05338	0	0	0	0	0	0	0	0	0	0	SCBFQ1:7	Standardization
		Clone B models	-0.4394	-0.431663	0.557983	3.25433	3.39043	0.368571	-7.01999	0	0	0	0	0	0	0	0	0	0	0	SCBFQ1:6	Standardization
		Clone B models	-0.4433	-1.6846	1.09171	7.1665	4.27985	-10.5433	0	0	0	0	0	0	0	0	0	0	0	0	SCBFQ1:5	Standardization
		Clone B models	0.1854	-3.0893	2.38805	15.242	-13.5377	0	0	0	0	0	0	0	0	0	0	0	0	0	SCBFQ1:4	Standardization
		Clone B models	1.9424	0.181236	0.630713	1.71635	0	0	0	0	0	0	0	0	0	0	0	0	0	0	SCBFQ1:3	Standardization
		Clone B models	1.6994	0.97448	1.13834	0	0	0	0	0	0	0	0	0	0	0	0	0	0	0	SCBFQ1:2	Standardization
		Clone B models	1.653	1.94857	0	0	0	0	0	0	0	0	0	0	0	0	0	0	0	0	SCBFQ1:1	Standardization
		Clone A models	-6.4765	-3.23536	1.40344	2.41745	3.20028	2.14384	0.69674	-0.572725	-1.56764	-1.96778	-2.0971	-2.18412	-1.42836	-0.525178	-0.967649	-0.449252	-0.152705	0.0790367	MCAFQ1:17	Mean	PLS model of all frequencies from clone A
		Clone B models	-4.9363	0.117405	-1.25178	-0.235387	0.49041	1.28954	2.29715	2.7822	2.91174	2.09249	1.41162	0.198913	-0.499236	-1.61414	-2.26095	-2.92161	-3.58403	-3.91792	MCBFQ1:17	Mean	PLS model of all frequencies from clone B
		Clone A models	-6.6395	-3.67591	1.80027	2.89014	3.64587	2.19758	0.303095	-1.33233	-2.57819	-3.0523	-3.16025	0	0	0	0	0	0	0	MCAFQ1:10	Mean	PLS model of selected frequencies from clone A
		Clone B models	-1.2251	0.267991	0.193453	1.23575	1.22021	0.923512	0.72027	0.135694	-0.488564	-1.89887	-2.93052	0	0	0	0	0	0	0	MCBFQ1:10	Mean	PLS model of selected frequencies from clone B

## Sheet: Models in use
Model	Intercept	1	2	3	4	5	6	7	8	9	10	11	12	13	14	15	16	17	Modelname	Centering
Origin	'Interc'	'FQ300kHz'	'FQ373kHz'	'FQ465kHz'	'FQ578kHz'	'FQ720kHz'	'FQ897kHz'	'FQ1117kHz'	'FQ1391kHz'	'FQ1732kHz'	'FQ2156kHz'	'FQ2684kHz'	'FQ3342kHz'	'FQ4161kHz'	'FQ5181kHz'	'FQ6451kHz'	'FQ8031kHz'	'FQ10000kHz'	'Modelname'	'Centering'
Clone B models	0	0.267991	0.193453	1.23575	1.22021	0.923512	0.72027	0.135694	-0.488564	-1.89887	-2.93052	0	0	0	0	0	0	0	MCBFQ1:10	Mean
Clone A models	0	-3.67591	1.80027	2.89014	3.64587	2.19758	0.303095	-1.33233	-2.57819	-3.0523	-3.16025	0	0	0	0	0	0	0	MCAFQ1:10	Mean

## Sheet: Clone A-1 (Test set)
CLONE A-1			toff	VCCoff	t	VCC	FG_Perm_1 pF/cm	FG_Perm_2 pF/cm	FG_Perm_3 pF/cm	FG_Perm_4 pF/cm	FG_Perm_5 pF/cm	FG_Perm_6 pF/cm	FG_Perm_7 pF/cm	FG_Perm_8 pF/cm	FG_Perm_9 pF/cm	FG_Perm_10 pF/cm	FG_Perm_11 pF/cm	FG_Perm_12 pF/cm	FG_Perm_13 pF/cm	FG_Perm_14 pF/cm	FG_Perm_15 pF/cm	FG_Perm_16 pF/cm	FG_Perm_17 pF/cm	Intercept	FQ1	FQ2	FQ3	FQ4	FQ5	FQ6	FQ7	FQ8	FQ9	FQ10	FQ11	FQ12	FQ13	FQ14	FQ15	FQ16	FQ17	premodel1	premodel2	Clone B model	Yoffset1 (d1)	Yoffset2 (d2)	k at beginning	set this factor	RMSE (VCC) PLS
			0	3.01	0.0137384	3.01087	1.92244	1.70964	1.43203	1.19061	0.976605	0.781091	0.593792	0.442618	0.324063	0.231126	0.119395	0.116845	0.0747513	0.0535878	0.0362113	0.0378531	0.0226906	0	0.515198	0.330734	1.76963	1.4528	0.901907	0.562596	0.0805741	-0.216247	-0.615353	-0.677319	0	0	0	0	0	0	0	4.10452	1.92696	2.88418	-1.09364	0.957221	0.64	0.992441	14.6531
			0.940278	5.8	0.0345718	3.01549	2.01661	1.79887	1.52581	1.2859	1.04691	0.839689	0.649842	0.48752	0.369588	0.257007	0.154168	0.14022	0.0901946	0.0677117	0.0522131	0.0496879	0.0345632	0	0.540434	0.347997	1.88552	1.56907	0.966833	0.604802	0.0881796	-0.238185	-0.7018	-0.753166	0	0	0	0	0	0	0	4.30969	2.05827	3.01549
			1.93819	15.59	0.0554051	3.02399	2.11986	1.89641	1.62081	1.3773	1.12156	0.908421	0.69678	0.537708	0.398366	0.290682	0.17358	0.155031	0.106105	0.0811275	0.065251	0.0603827	0.0411242	0	0.568105	0.366866	2.00291	1.6806	1.03577	0.654309	0.0945489	-0.262705	-0.756446	-0.85185	0	0	0	0	0	0	0	4.53211	2.20062	3.15784
			2.94444	34.44	0.0762384	3.03631	6.62237	4.86722	3.53981	2.64463	1.92894	1.42983	1.02122	0.748879	0.525981	0.355862	0.206884	0.17894	0.117261	0.0886725	0.0706677	0.0705341	0.042464	0	1.77473	0.941579	4.37432	3.22701	1.7814	1.02986	0.138573	-0.365875	-0.99877	-1.04286	0	0	0	0	0	0	0	10.86	6.25045	7.20767
			3.95764	67.81	0.0970718	3.05234	6.65163	4.89084	3.59916	2.64712	1.94144	1.43515	1.03592	0.747165	0.526789	0.361021	0.219052	0.183556	0.122654	0.0920727	0.0714713	0.0618528	0.0438528	0	1.78258	0.946148	4.44766	3.23005	1.79294	1.0337	0.140568	-0.365038	-1.0003	-1.05798	0	0	0	0	0	0	0	10.9503	6.30827	7.2655
			5.00278	119.59	0.117905	3.072	6.70987	4.94691	3.62087	2.67594	1.94967	1.43858	1.0253	0.736955	0.518836	0.351297	0.197718	0.175569	0.108676	0.0788121	0.0628836	0.0614079	0.0364019	0	1.79818	0.956994	4.47449	3.26521	1.80054	1.03616	0.139127	-0.360049	-0.985202	-1.02948	0	0	0	0	0	0	0	11.096	6.4015	7.35872
			6.01667	142.05	0.138738	3.09521	6.80516	4.96637	3.6397	2.6776	1.95359	1.41693	1.00339	0.707522	0.492021	0.327528	0.157324	0.150241	0.0833056	0.0593526	0.0458025	0.0497711	0.0344474	0	1.82372	0.960759	4.49776	3.26724	1.80417	1.02057	0.136154	-0.34567	-0.934284	-0.959829	0	0	0	0	0	0	0	11.2706	6.51325	7.47047
			6.94792	142.71	0.159572	3.12188	6.83998	5.03033	3.65931	2.69196	1.94167	1.41695	0.996891	0.711273	0.494737	0.322488	0.154348	0.150882	0.0867182	0.0603096	0.0479877	0.047127	0.029542	0	1.83305	0.973132	4.52199	3.28476	1.79315	1.02059	0.135272	-0.347502	-0.939442	-0.945056	0	0	0	0	0	0	0	11.33	6.55124	7.50846
			7.96458	132.57	0.180405	3.15193	6.92726	5.05195	3.70833	2.69738	1.97306	1.42419	1.02282	0.724518	0.504122	0.341679	0.178436	0.163103	0.102304	0.0739563	0.0618192	0.0616639	0.0392627	0	1.85644	0.977315	4.58257	3.29138	1.82214	1.0258	0.13879	-0.353973	-0.957262	-1.0013	0	0	0	0	0	0	0	11.3819	6.58449	7.54171
			8.96389	97.37	0.201238	3.18526	7.01058	5.13098	3.73349	2.72579	1.9872	1.43778	1.02559	0.716973	0.500043	0.330532	0.172427	0.165892	0.10463	0.0709214	0.0593613	0.0613587	0.0368004	0	1.87877	0.992603	4.61366	3.32604	1.8352	1.03559	0.139167	-0.350287	-0.949517	-0.96863	0	0	0	0	0	0	0	11.5526	6.69373	7.65095
			9.95903	89.97	0.222072	3.2218	7.05703	5.17234	3.79623	2.76434	1.98789	1.45218	1.02761	0.72384	0.509373	0.340112	0.176936	0.167206	0.101478	0.073809	0.0618944	0.0661686	0.04418	0	1.89122	1.00061	4.69119	3.37308	1.83584	1.04596	0.139441	-0.353642	-0.967233	-0.996705	0	0	0	0	0	0	0	11.6598	6.76231	7.71953
			10.9118	78.6	0.242905	3.26145	7.12547	5.19594	3.79827	2.78193	2.01731	1.46092	1.04054	0.717636	0.501122	0.332963	0.16501	0.160498	0.0977416	0.0748821	0.0567185	0.061337	0.034825	0	1.90956	1.00517	4.69371	3.39454	1.86301	1.05226	0.141195	-0.350611	-0.951566	-0.975754	0	0	0	0	0	0	0	11.7815	6.84024	7.79746
					0.263738	3.30413	7.20151	5.28237	3.84833	2.8355	2.06234	1.50687	1.06905	0.760716	0.538787	0.373889	0.215323	0.19663	0.129683	0.101102	0.0794095	0.0731001	0.0534152	0	1.92994	1.02189	4.75557	3.45991	1.90459	1.08536	0.145064	-0.371658	-1.02309	-1.09569	0	0	0	0	0	0	0	11.8119	6.85968	7.8169
					0.284572	3.34976	7.28955	5.29626	3.90982	2.86444	2.11385	1.53788	1.11247	0.802908	0.581747	0.403722	0.256637	0.214045	0.148163	0.116895	0.0980487	0.0881685	0.0666928	0	1.95353	1.02458	4.83156	3.49522	1.95217	1.10769	0.150955	-0.392272	-1.10466	-1.18312	0	0	0	0	0	0	0	11.8357	6.87489	7.83211
					0.305405	3.39825	7.35239	5.37322	3.95174	2.89614	2.10318	1.55191	1.11038	0.790438	0.566467	0.386667	0.228394	0.198376	0.134098	0.0982676	0.0806941	0.0753239	0.0528878	0	1.97037	1.03946	4.88336	3.5339	1.94231	1.1178	0.150672	-0.38618	-1.07565	-1.13313	0	0	0	0	0	0	0	12.0429	7.00753	7.96476
					0.326238	3.44951	7.4417	5.44344	4.01033	2.95386	2.16001	1.57302	1.12356	0.796804	0.561207	0.383885	0.215702	0.202299	0.132074	0.100486	0.0840251	0.0838867	0.05907	0	1.99431	1.05305	4.95577	3.60433	1.9948	1.133	0.15246	-0.38929	-1.06566	-1.12498	0	0	0	0	0	0	0	12.3078	7.17705	8.13427
					0.347083	3.50348	7.49065	5.44818	4.03724	2.97367	2.17238	1.5996	1.13822	0.814798	0.581298	0.404982	0.230362	0.212495	0.139175	0.103158	0.0899487	0.0892023	0.0629052	0	2.00743	1.05397	4.98902	3.6285	2.00622	1.15214	0.15445	-0.398081	-1.10381	-1.18681	0	0	0	0	0	0	0	12.303	7.174	8.13122
					0.367917	3.56003	7.57205	5.55693	4.1021	2.99431	2.18298	1.60389	1.14497	0.810547	0.571122	0.395409	0.212563	0.199568	0.122562	0.0886979	0.0754259	0.0739598	0.0478153	0	2.02924	1.075	5.06916	3.65369	2.01601	1.15524	0.155365	-0.396004	-1.08449	-1.15875	0	0	0	0	0	0	0	12.5145	7.30933	8.26655
					0.38875	3.61909	7.62048	5.61701	4.13406	3.03949	2.23571	1.65518	1.18526	0.854458	0.608822	0.423457	0.260069	0.230826	0.158484	0.122278	0.103039	0.0965337	0.0729762	0	2.04222	1.08663	5.10866	3.70881	2.0647	1.19218	0.160832	-0.417457	-1.15607	-1.24095	0	0	0	0	0	0	0	12.5496	7.33178	8.289
					0.409583	3.68058	7.70003	5.66739	4.19082	3.09435	2.25071	1.67396	1.20346	0.855765	0.622625	0.425802	0.244394	0.224902	0.148777	0.111448	0.0969621	0.0874031	0.0664023	0	2.06354	1.09637	5.1788	3.77576	2.07856	1.20571	0.163302	-0.418096	-1.18228	-1.24782	0	0	0	0	0	0	0	12.7138	7.43693	8.39415
					0.430417	3.74441	7.7574	5.73629	4.23924	3.13205	2.30014	1.69208	1.21716	0.879674	0.631845	0.437545	0.251463	0.222161	0.150961	0.1087	0.0949073	0.0896205	0.0637823	0	2.07891	1.1097	5.23865	3.82176	2.12421	1.21875	0.165161	-0.429777	-1.19979	-1.28223	0	0	0	0	0	0	0	12.8453	7.52108	8.47831
					0.45125	3.8105	7.83256	5.76451	4.28632	3.18281	2.33652	1.73203	1.25287	0.912058	0.659582	0.459015	0.274757	0.243662	0.169185	0.128137	0.108633	0.103338	0.0799116	0	2.09905	1.11516	5.29682	3.88369	2.1578	1.24753	0.170007	-0.445599	-1.25246	-1.34515	0	0	0	0	0	0	0	12.9269	7.57326	8.53048
					0.472083	3.87876	7.90125	5.85631	4.31885	3.21674	2.37133	1.75666	1.26955	0.924737	0.66927	0.467546	0.279054	0.246934	0.173568	0.133588	0.10928	0.104967	0.0762447	0	2.11746	1.13292	5.33701	3.9251	2.18995	1.26527	0.17227	-0.451793	-1.27086	-1.37015	0	0	0	0	0	0	0	13.0472	7.65026	8.60749
					0.492917	3.9491	7.9412	5.89209	4.37161	3.2589	2.3931	1.76792	1.28554	0.933187	0.670461	0.468594	0.275224	0.250958	0.173444	0.131752	0.112259	0.11121	0.0817203	0	2.12817	1.13984	5.40222	3.97655	2.21006	1.27338	0.174441	-0.455922	-1.27312	-1.37322	0	0	0	0	0	0	0	13.2024	7.7496	8.70682
					0.51375	4.02144	8.01692	5.9466	4.44855	3.33469	2.46934	1.84966	1.35658	0.992923	0.732535	0.529251	0.365518	0.303032	0.226879	0.185615	0.159132	0.140048	0.110595	0	2.14846	1.15039	5.4973	4.06902	2.28046	1.33225	0.18408	-0.485106	-1.39099	-1.55098	0	0	0	0	0	0	0	13.2349	7.77039	8.72761
					0.534583	4.0957	8.06257	6.00491	4.49579	3.38865	2.53636	1.89051	1.39581	1.0341	0.766626	0.561256	0.423698	0.3374	0.265746	0.218474	0.181166	0.157792	0.130065	0	2.1607	1.16167	5.55567	4.13487	2.34236	1.36168	0.189404	-0.505223	-1.45572	-1.64477	0	0	0	0	0	0	0	13.3006	7.81247	8.76969
					0.555417	4.17177	8.1044	6.02596	4.5398	3.44336	2.58853	1.9624	1.45551	1.09694	0.835173	0.624046	0.513024	0.396067	0.322865	0.271849	0.223871	0.188466	0.164304	0	2.17191	1.16574	5.61006	4.20163	2.39054	1.41346	0.197503	-0.535924	-1.58589	-1.82878	0	0	0	0	0	0	0	13.2002	7.74823	8.70545
					0.57625	4.24959	8.18974	6.15149	4.62776	3.51623	2.65195	1.99417	1.51166	1.14365	0.873127	0.661547	0.561418	0.424527	0.357874	0.302155	0.252097	0.205551	0.18785	0	2.19478	1.19002	5.71876	4.29054	2.44911	1.43634	0.205124	-0.558745	-1.65796	-1.93868	0	0	0	0	0	0	0	13.3293	7.83082	8.78804
					0.597083	4.32906	8.26194	6.19662	4.6728	3.54903	2.68396	2.02908	1.51405	1.1445	0.861203	0.661643	0.564784	0.422591	0.350055	0.299615	0.249212	0.207326	0.179391	0	2.21413	1.19875	5.77441	4.33056	2.47867	1.46149	0.205448	-0.559163	-1.63531	-1.93896	0	0	0	0	0	0	0	13.53	7.95928	8.9165
					0.617917	4.4101	8.28682	6.21666	4.69645	3.57902	2.68982	2.04238	1.52268	1.14941	0.864502	0.655867	0.550187	0.422338	0.344858	0.290561	0.240248	0.20211	0.182824	0	2.22079	1.20263	5.80364	4.36716	2.48408	1.47106	0.206618	-0.561558	-1.64158	-1.92203	0	0	0	0	0	0	0	13.6308	8.02379	8.98101
					0.63875	4.49262	8.36188	6.299	4.76891	3.61673	2.74519	2.07414	1.54563	1.15845	0.874369	0.665401	0.549768	0.419123	0.341377	0.289036	0.242119	0.198184	0.178128	0	2.24091	1.21856	5.89319	4.41317	2.53521	1.49394	0.209732	-0.565975	-1.66031	-1.94997	0	0	0	0	0	0	0	13.8285	8.15028	9.1075
					0.659583	4.57654	8.43186	6.35103	4.81504	3.65484	2.74322	2.09342	1.53845	1.14836	0.853772	0.630145	0.493988	0.381107	0.30477	0.255209	0.209777	0.178339	0.15201	0	2.25966	1.22863	5.95018	4.45967	2.5334	1.50783	0.208758	-0.561046	-1.6212	-1.84665	0	0	0	0	0	0	0	14.1192	8.33637	9.29359
					0.680417	4.66177	8.59348	6.4682	4.8691	3.70766	2.7827	2.07747	1.53454	1.12228	0.821729	0.59393	0.422447	0.342956	0.263553	0.215489	0.184551	0.164796	0.132309	0	2.30297	1.25129	6.01699	4.52412	2.56985	1.49634	0.208227	-0.548306	-1.56036	-1.74052	0	0	0	0	0	0	0	14.5206	8.59326	9.55048
					0.70125	4.74822	8.6577	6.5139	4.91046	3.70301	2.77409	2.07607	1.52915	1.11836	0.807469	0.584219	0.389576	0.326521	0.242683	0.193884	0.16761	0.153151	0.121757	0	2.32019	1.26013	6.06811	4.51845	2.5619	1.49533	0.207496	-0.546391	-1.53328	-1.71206	0	0	0	0	0	0	0	14.6399	8.66959	9.62681
					0.722083	4.83581	8.74961	6.62635	5.00329	3.77521	2.83179	2.11194	1.54697	1.13175	0.813248	0.58777	0.381238	0.3258	0.237778	0.189939	0.160495	0.146852	0.118552	0	2.34482	1.28189	6.18282	4.60655	2.61519	1.52117	0.209915	-0.55293	-1.54425	-1.72247	0	0	0	0	0	0	0	14.9427	8.86339	9.82061
					0.742917	4.92445	8.80945	6.68661	5.05744	3.82645	2.86107	2.14061	1.56154	1.15738	0.831281	0.590842	0.374366	0.331793	0.241154	0.191682	0.163663	0.157757	0.131419	0	2.36085	1.29354	6.24974	4.66908	2.64223	1.54182	0.211892	-0.565456	-1.57849	-1.73147	0	0	0	0	0	0	0	15.0937	8.96006	9.91728
					0.76375	5.01405	8.90157	6.72454	5.09731	3.88502	2.93736	2.21094	1.63459	1.19762	0.881655	0.637717	0.455482	0.369316	0.283144	0.221816	0.195286	0.170609	0.139618	0	2.38554	1.30088	6.299	4.74054	2.71269	1.59248	0.221804	-0.585114	-1.67415	-1.86884	0	0	0	0	0	0	0	15.1248	8.97996	9.93718
					0.784583	5.10454	8.93309	6.80362	5.14093	3.93969	2.97631	2.2479	1.69002	1.24621	0.923012	0.681302	0.51156	0.409259	0.321678	0.267335	0.219876	0.19492	0.164048	0	2.39399	1.31618	6.3529	4.80725	2.74866	1.61909	0.229326	-0.608852	-1.75268	-1.99657	0	0	0	0	0	0	0	15.1093	8.97002	9.92724
					0.805417	5.19581	8.98239	6.85233	5.22819	3.99862	3.04007	2.29308	1.70953	1.28054	0.944103	0.704264	0.534504	0.422799	0.33308	0.271519	0.22802	0.199093	0.173346	0	2.4072	1.3256	6.46074	4.87915	2.80754	1.65164	0.231974	-0.625624	-1.79273	-2.06386	0	0	0	0	0	0	0	15.2816	9.08032	10.0375
					0.82625	5.2878	9.11967	6.97054	5.31445	4.06256	3.08066	2.33329	1.73349	1.30011	0.950824	0.711949	0.53375	0.421682	0.328878	0.272748	0.227078	0.201333	0.170992	0	2.44399	1.34847	6.56733	4.95718	2.84503	1.6806	0.235224	-0.635186	-1.80549	-2.08638	0	0	0	0	0	0	0	15.5508	9.25256	10.2098
					0.847083	5.38041	9.21309	7.02646	5.35607	4.10411	3.11507	2.37616	1.77233	1.31637	0.973833	0.719125	0.54472	0.431886	0.336132	0.273553	0.233272	0.198317	0.17044	0	2.46903	1.35929	6.61876	5.00788	2.8768	1.71148	0.240495	-0.643131	-1.84918	-2.10741	0	0	0	0	0	0	0	15.684	9.33783	10.2951
					0.867917	5.47355	9.2128	7.05389	5.41344	4.15159	3.14305	2.38993	1.77926	1.332	0.992853	0.73032	0.557207	0.436578	0.347215	0.285175	0.239891	0.202023	0.174619	0	2.46895	1.3646	6.68966	5.06581	2.90265	1.72139	0.241435	-0.650768	-1.8853	-2.14022	0	0	0	0	0	0	0	15.7782	9.39812	10.3553
					0.88875	5.56714	9.37574	7.19764	5.48562	4.19356	3.21182	2.42686	1.82122	1.35298	1.00353	0.745747	0.564974	0.446266	0.349589	0.280168	0.23848	0.201256	0.17461	0	2.51261	1.39241	6.77886	5.11703	2.96615	1.74799	0.247129	-0.661019	-1.90557	-2.18543	0	0	0	0	0	0	0	16.0102	9.54657	10.5038
					0.909583	5.66109	9.40873	7.22739	5.56115	4.25288	3.22767	2.44612	1.81714	1.35527	0.988788	0.724269	0.530732	0.423465	0.32943	0.26548	0.22269	0.196513	0.162174	0	2.52146	1.39816	6.8722	5.18941	2.98079	1.76187	0.246575	-0.662134	-1.87758	-2.12249	0	0	0	0	0	0	0	16.3083	9.73735	10.6946
					0.930417	5.75533	9.48282	7.26532	5.61483	4.30455	3.2805	2.47542	1.84728	1.38474	1.01798	0.744701	0.537499	0.432331	0.32937	0.270901	0.231513	0.202016	0.169299	0	2.54131	1.4055	6.93852	5.25246	3.02958	1.78297	0.250665	-0.676535	-1.93301	-2.18236	0	0	0	0	0	0	0	16.4091	9.80189	10.7591
					0.95125	5.85063	9.56312	7.37111	5.66023	4.32632	3.28708	2.49104	1.85257	1.37404	1.00221	0.727935	0.507886	0.410196	0.313853	0.252433	0.207768	0.186756	0.151899	0	2.56283	1.42596	6.99463	5.27902	3.03566	1.79422	0.251383	-0.671306	-1.90307	-2.13323	0	0	0	0	0	0	0	16.6361	9.94717	10.9044
					0.972083	5.95168	9.67832	7.44209	5.73815	4.38955	3.33902	2.53669	1.88456	1.39222	1.02314	0.735197	0.508003	0.422732	0.313047	0.250042	0.206674	0.183305	0.150187	0	2.5937	1.43969	7.09092	5.35618	3.08362	1.8271	0.255723	-0.68019	-1.94281	-2.15451	0	0	0	0	0	0	0	16.8694	10.0965	11.0537
					0.992928	6.05912	9.80166	7.53995	5.80988	4.46197	3.40555	2.58313	1.92828	1.43018	1.05622	0.764992	0.539672	0.442738	0.32462	0.264677	0.215844	0.193069	0.161458	0	2.62676	1.45863	7.17956	5.44454	3.14507	1.86055	0.261655	-0.698734	-2.00563	-2.24182	0	0	0	0	0	0	0	17.0306	10.1996	11.1569
					1.01376	6.17272	9.82926	7.55807	5.8469	4.50132	3.42737	2.60008	1.92752	1.41514	1.03618	0.750167	0.510021	0.421238	0.309301	0.246661	0.206074	0.184648	0.152658	0	2.63415	1.46213	7.22531	5.49255	3.16522	1.87276	0.261554	-0.691385	-1.96758	-2.19838	0	0	0	0	0	0	0	17.2563	10.3441	11.3014
					1.03459	6.29242	9.97002	7.67797	5.91642	4.56778	3.47026	2.63145	1.96005	1.45509	1.05224	0.761132	0.511895	0.423518	0.312665	0.248842	0.210535	0.188047	0.154067	0	2.67188	1.48533	7.31121	5.57365	3.20483	1.89536	0.265966	-0.710906	-1.99806	-2.23051	0	0	0	0	0	0	0	17.4687	10.4801	11.4373
					1.05543	6.41809	10.0913	7.79945	6.01874	4.67021	3.55378	2.68226	1.98806	1.47851	1.07203	0.774134	0.519002	0.428963	0.313629	0.244595	0.205117	0.186198	0.1505	0	2.70436	1.50883	7.43766	5.69863	3.28196	1.93195	0.269767	-0.722345	-2.03565	-2.26862	0	0	0	0	0	0	0	17.8065	10.6963	11.6535
					1.07626	6.54961	12.022	9.00926	6.80605	5.12731	3.84502	2.86199	2.0937	1.53053	1.10077	0.793916	0.527164	0.438523	0.319524	0.251164	0.21492	0.192767	0.157896	0	3.22179	1.74287	8.41058	6.25639	3.55092	2.0614	0.284102	-0.74776	-2.09021	-2.32659	0	0	0	0	0	0	0	20.3635	12.3327	13.2899
					1.09709	6.68686	12.2781	9.2015	6.92021	5.20063	3.88941	2.90264	2.11852	1.54749	1.10826	0.792847	0.519379	0.431726	0.317135	0.247092	0.20693	0.189558	0.154346	0	3.29043	1.78006	8.55165	6.34586	3.59192	2.09068	0.287471	-0.75605	-2.10443	-2.32345	0	0	0	0	0	0	0	20.7541	12.5827	13.5399
					1.11793	6.82972	12.4167	9.33691	7.03031	5.28162	3.94018	2.9344	2.15177	1.57006	1.12238	0.79849	0.516868	0.43356	0.308028	0.245817	0.201456	0.185296	0.148696	0	3.32756	1.80625	8.6877	6.44469	3.63881	2.11356	0.291982	-0.767076	-2.13125	-2.33999	0	0	0	0	0	0	0	21.0722	12.7863	13.7435
					1.13876	6.97807	12.5945	9.4657	7.15649	5.38933	4.05456	3.02954	2.22785	1.63203	1.17525	0.848405	0.575141	0.465987	0.341298	0.268289	0.230125	0.20721	0.166449	0	3.3752	1.83117	8.84363	6.57611	3.74444	2.18209	0.302307	-0.797352	-2.23165	-2.48627	0	0	0	0	0	0	0	21.3397	12.9575	13.9147
					1.15959	7.13179	12.6776	9.52238	7.17087	5.42387	4.07088	3.03568	2.23823	1.63478	1.18376	0.862769	0.57285	0.46848	0.351092	0.268936	0.229809	0.206127	0.171173	0	3.39749	1.84213	8.8614	6.61827	3.75951	2.18651	0.303714	-0.798692	-2.24781	-2.52836	0	0	0	0	0	0	0	21.3942	12.9923	13.9496
					1.18043	7.29076	12.7692	9.61408	7.29971	5.52385	4.15047	3.10144	2.27241	1.66438	1.20132	0.867903	0.577438	0.477265	0.346263	0.274357	0.229911	0.205386	0.166903	0	3.42202	1.85987	9.02062	6.74026	3.83301	2.23387	0.308353	-0.813155	-2.28114	-2.54341	0	0	0	0	0	0	0	21.7803	13.2395	14.1967
					1.20126	7.45486	12.9061	9.71154	7.35854	5.59452	4.19115	3.14341	2.31475	1.68704	1.2272	0.878857	0.589121	0.483346	0.348219	0.274857	0.22755	0.204473	0.162732	0	3.45872	1.87873	9.09331	6.82649	3.87058	2.2641	0.314097	-0.824225	-2.33029	-2.57551	0	0	0	0	0	0	0	21.976	13.3647	14.3219
					1.22209	7.62396	13.0345	9.8367	7.47286	5.67983	4.28419	3.21134	2.36192	1.73563	1.25238	0.903882	0.604008	0.496274	0.360288	0.286234	0.240016	0.215007	0.17223	0	3.49312	1.90294	9.23459	6.93058	3.9565	2.31303	0.320498	-0.847965	-2.37811	-2.64884	0	0	0	0	0	0	0	22.2763	13.5569	14.5141
					1.24293	7.79795	13.1501	9.92698	7.55208	5.73196	4.31433	3.22636	2.37852	1.7499	1.26179	0.900145	0.603196	0.494482	0.353873	0.279586	0.229479	0.20764	0.160039	0	3.52412	1.9204	9.33248	6.9942	3.98434	2.32385	0.32275	-0.85494	-2.39598	-2.63789	0	0	0	0	0	0	0	22.5133	13.7086	14.6658
					1.26376	7.97671	13.3009	10.0558	7.68702	5.84944	4.4142	3.32398	2.45629	1.81217	1.31861	0.942085	0.648149	0.52343	0.377221	0.298811	0.246941	0.216389	0.17688	0	3.56453	1.94532	9.49924	7.13755	4.07656	2.39416	0.333304	-0.88536	-2.50388	-2.7608	0	0	0	0	0	0	0	22.8006	13.8925	14.8497
					1.28459	8.16011	13.3475	10.1353	7.75336	5.91914	4.49355	3.39369	2.50571	1.8429	1.35176	0.979145	0.68418	0.544958	0.402733	0.316855	0.264198	0.229202	0.185382	0	3.577	1.9607	9.58121	7.22259	4.14984	2.44437	0.340009	-0.900375	-2.56682	-2.8694	0	0	0	0	0	0	0	22.9391	13.9811	14.9383
					1.30543	8.34803	13.5154	10.2761	7.83957	6.01914	4.56594	3.42627	2.5496	1.88334	1.37136	0.991081	0.678814	0.54367	0.399471	0.314227	0.257639	0.226775	0.178564	0	3.62201	1.98795	9.68775	7.34462	4.2167	2.46784	0.345965	-0.920134	-2.60404	-2.90438	0	0	0	0	0	0	0	23.2443	14.1764	15.1336
					1.32626	8.54035	13.6008	10.3606	7.94309	6.11047	4.60851	3.47295	2.57218	1.89481	1.37605	0.991231	0.654464	0.535749	0.385595	0.297258	0.242841	0.215253	0.172501	0	3.64489	2.00428	9.81567	7.45605	4.25602	2.50146	0.349029	-0.925736	-2.61293	-2.90482	0	0	0	0	0	0	0	23.5839	14.3938	15.351
					1.34709	8.73696	13.7405	10.5091	8.0713	6.16539	4.69625	3.5354	2.62389	1.92813	1.38915	1.00024	0.663572	0.546712	0.388599	0.299988	0.241312	0.215489	0.171753	0	3.68233	2.03301	9.97411	7.52306	4.33704	2.54645	0.356046	-0.942013	-2.63782	-2.93123	0	0	0	0	0	0	0	23.941	14.6223	15.5795
					1.36793	8.93773	13.8469	10.5763	8.1455	6.22406	4.75658	3.58215	2.65824	1.95843	1.42335	1.02971	0.692785	0.560588	0.405571	0.316349	0.260596	0.228171	0.182434	0	3.71084	2.04602	10.0658	7.59466	4.39276	2.58011	0.360707	-0.956817	-2.70275	-3.01759	0	0	0	0	0	0	0	24.0737	14.7073	15.6645
					1.38876	9.14254	14.0681	10.7746	8.33249	6.41208	4.88985	3.70118	2.75669	2.03529	1.47368	1.07182	0.723615	0.582641	0.425792	0.330435	0.271793	0.237834	0.191455	0	3.77013	2.08438	10.2969	7.82408	4.51584	2.66585	0.374066	-0.994368	-2.79833	-3.14098	0	0	0	0	0	0	0	24.5975	15.0425	15.9997
					1.40959	9.35127	14.1523	10.8877	8.39927	6.47081	4.95926	3.74858	2.78875	2.07257	1.50219	1.0874	0.744899	0.598851	0.436517	0.335378	0.275316	0.240559	0.191954	0	3.79269	2.10625	10.3794	7.89575	4.57994	2.69999	0.378416	-1.01258	-2.85246	-3.18666	0	0	0	0	0	0	0	24.7807	15.1597	16.117
					1.43043	9.5638	14.3146	10.998	8.50402	6.56489	5.01136	3.80369	2.84417	2.09245	1.52529	1.10737	0.757217	0.615538	0.443881	0.347903	0.285973	0.245021	0.198247	0	3.83619	2.12759	10.5088	8.01054	4.62805	2.73969	0.385937	-1.0223	-2.89632	-3.24516	0	0	0	0	0	0	0	25.0731	15.3468	16.304
					1.45126	9.78	14.4362	11.1224	8.62916	6.66995	5.11447	3.87104	2.89511	2.14238	1.55359	1.13202	0.772875	0.620504	0.459633	0.355736	0.287328	0.247801	0.198757	0	3.86876	2.15166	10.6635	8.13874	4.72328	2.7882	0.392849	-1.04669	-2.95006	-3.31741	0	0	0	0	0	0	0	25.4128	15.5643	16.5215
					1.47209	9.99977	14.6098	11.2534	8.73852	6.77207	5.19222	3.94592	2.93199	2.17024	1.58397	1.1439	0.771923	0.626536	0.453222	0.348185	0.289002	0.245475	0.19787	0	3.91529	2.177	10.7986	8.26335	4.79508	2.84213	0.397854	-1.0603	-3.00774	-3.35221	0	0	0	0	0	0	0	25.7691	15.7923	16.7495
					1.49293	10.223	14.7181	11.3954	8.85655	6.87366	5.25271	3.9953	2.99005	2.21223	1.62112	1.1737	0.796602	0.639468	0.466219	0.355421	0.29133	0.255824	0.202345	0	3.94432	2.20447	10.9445	8.38731	4.85094	2.87769	0.405731	-1.08082	-3.0783	-3.43954	0	0	0	0	0	0	0	26.0163	15.9505	16.9077
					1.51376	10.4495	14.901	11.542	8.98926	6.98445	5.37393	4.07226	3.05376	2.27502	1.65333	1.21113	0.849457	0.671425	0.495415	0.386708	0.31658	0.269583	0.213544	0	3.99334	2.23284	11.1085	8.5225	4.96289	2.93313	0.414377	-1.11149	-3.13947	-3.54924	0	0	0	0	0	0	0	26.3674	16.1752	17.1324
					1.53459	10.6792	15.0583	11.6976	9.14229	7.08616	5.49656	4.17505	3.13746	2.33553	1.72161	1.26118	0.915034	0.71203	0.538417	0.422229	0.342112	0.284646	0.233545	0	4.03549	2.26293	11.2976	8.64661	5.07614	3.00717	0.425734	-1.14106	-3.26912	-3.69592	0	0	0	0	0	0	0	26.6455	16.3532	17.3104
					1.55543	10.912	15.1587	11.8282	9.25949	7.23496	5.5766	4.26326	3.21729	2.40447	1.77536	1.31439	0.981015	0.748733	0.574821	0.449548	0.363056	0.296964	0.244174	0	4.06239	2.28819	11.4424	8.82817	5.15006	3.07069	0.436567	-1.17474	-3.37117	-3.85184	0	0	0	0	0	0	0	26.8807	16.5037	17.461
					1.57626	11.1477	15.3107	11.9774	9.39961	7.34671	5.70289	4.39948	3.33279	2.50358	1.84728	1.39244	1.07797	0.8145	0.640086	0.509939	0.414254	0.336481	0.279883	0	4.10314	2.31706	11.6156	8.96454	5.26669	3.16882	0.45224	-1.22316	-3.50775	-4.08056	0	0	0	0	0	0	0	27.0766	16.6291	17.5863
					1.59709	11.3863	15.4658	12.1458	9.56334	7.5084	5.82166	4.47099	3.38776	2.54962	1.89981	1.42956	1.12925	0.839565	0.671822	0.538349	0.43196	0.349329	0.294875	0	4.1447	2.34965	11.8179	9.16182	5.37638	3.22032	0.459699	-1.24565	-3.6075	-4.18936	0	0	0	0	0	0	0	27.488	16.8924	17.8496
					1.61793	11.6276	15.6425	12.2423	9.66464	7.587	5.87982	4.52896	3.42137	2.55903	1.90291	1.42147	1.10111	0.82087	0.642246	0.514356	0.417861	0.338511	0.285761	0	4.19205	2.36832	11.9431	9.25774	5.43009	3.26207	0.464259	-1.25025	-3.61339	-4.16564	0	0	0	0	0	0	0	27.8883	17.1486	18.1058
					1.63877	11.8716	15.8246	12.4313	9.77888	7.72461	5.98861	4.58675	3.47551	2.59516	1.92547	1.42963	1.09054	0.824414	0.637541	0.50254	0.407718	0.334452	0.278834	0	4.24085	2.40487	12.0843	9.42564	5.53056	3.3037	0.471606	-1.2679	-3.65622	-4.18956	0	0	0	0	0	0	0	28.3478	17.4427	18.3999
					1.65961	12.1179	16.0773	12.5935	9.93604	7.7989	6.06561	4.64315	3.5207	2.62221	1.93099	1.42406	1.04824	0.792768	0.606571	0.475386	0.386024	0.318625	0.256944	0	4.30858	2.43625	12.2785	9.51629	5.60166	3.34432	0.477738	-1.28112	-3.6667	-4.17323	0	0	0	0	0	0	0	28.8423	17.7591	18.7163
					1.68044	12.3666	16.2277	12.7775	10.0864	7.90744	6.14842	4.70929	3.53576	2.64291	1.92847	1.41184	0.998009	0.778072	0.575298	0.446737	0.36185	0.303781	0.240123	0	4.34887	2.47184	12.4643	9.64874	5.67814	3.39196	0.479781	-1.29123	-3.66191	-4.13744	0	0	0	0	0	0	0	29.393	18.1116	19.0688
					1.70127	12.6175	16.4193	12.9604	10.2011	8.0316	6.23726	4.75784	3.59054	2.67601	1.96264	1.43197	1.00307	0.78871	0.581425	0.4435	0.357772	0.30449	0.23695	0	4.40023	2.50722	12.606	9.80024	5.76018	3.42693	0.487214	-1.3074	-3.72679	-4.19642	0	0	0	0	0	0	0	29.7574	18.3448	19.302
					1.72211	12.8706	16.7013	13.1864	10.4282	8.22943	6.38618	4.91326	3.69566	2.76916	2.02969	1.48463	1.04232	0.818255	0.602302	0.466722	0.374626	0.310051	0.248326	0	4.47579	2.55095	12.8866	10.0416	5.89771	3.53887	0.501479	-1.35291	-3.85411	-4.35074	0	0	0	0	0	0	0	30.3353	18.7147	19.6719
					1.74294	13.1256	16.8034	13.2729	10.4831	8.27911	6.42462	4.93037	3.72605	2.77302	2.03007	1.49463	1.04983	0.829933	0.613097	0.474799	0.381389	0.320337	0.251239	0	4.50316	2.56768	12.9544	10.1023	5.93322	3.5512	0.505602	-1.3548	-3.85484	-4.38004	0	0	0	0	0	0	0	30.5279	18.8379	19.7951
					1.76377	13.3825	17.0652	13.4993	10.7123	8.45136	6.59323	5.05292	3.80142	2.8386	2.09342	1.53087	1.08039	0.847332	0.624873	0.48303	0.384904	0.321627	0.252829	0	4.57331	2.61147	13.2377	10.3124	6.08892	3.63947	0.51583	-1.38684	-3.97513	-4.48624	0	0	0	0	0	0	0	31.1309	19.2239	20.1811
					1.78461	13.6411	17.1978	13.6727	10.8639	8.55954	6.68055	5.12748	3.86116	2.8895	2.11622	1.54878	1.08756	0.850792	0.631273	0.487276	0.387969	0.324103	0.252557	0	4.60886	2.64503	13.425	10.4444	6.16956	3.69317	0.523937	-1.41171	-4.01842	-4.53874	0	0	0	0	0	0	0	31.5411	19.4864	20.4436
					1.80544	13.9014	17.5003	13.9269	11.0326	8.72234	6.80683	5.21484	3.94019	2.93492	2.14532	1.56934	1.09331	0.8652	0.635236	0.486921	0.391427	0.32333	0.251321	0	4.68992	2.6942	13.6335	10.6431	6.28619	3.75609	0.53466	-1.4339	-4.07368	-4.59899	0	0	0	0	0	0	0	32.1311	19.864	20.8212
					1.82627	14.1631	17.5918	14.008	11.1928	8.85266	6.91135	5.32145	4.02338	3.0299	2.2309	1.64401	1.19481	0.927241	0.698376	0.546225	0.439702	0.36046	0.290274	0	4.71444	2.70988	13.8315	10.8021	6.38272	3.83288	0.545949	-1.4803	-4.23619	-4.81781	0	0	0	0	0	0	0	32.2852	19.9626	20.9198
					1.84711	14.4263	17.8497	14.2312	11.3541	9.05807	7.07962	5.47844	4.15985	3.13219	2.33391	1.73726	1.30926	0.990201	0.76445	0.602698	0.485942	0.397485	0.322212	0	4.78357	2.75307	14.0308	11.0527	6.53811	3.94595	0.564467	-1.53028	-4.4318	-5.09107	0	0	0	0	0	0	0	32.6156	20.174	21.1313
					1.86794	14.6907	18.0239	14.4183	11.4896	9.13428	7.17069	5.54551	4.20956	3.17492	2.35445	1.74999	1.32661	0.998507	0.769592	0.603247	0.48663	0.389432	0.321077	0	4.83024	2.78926	14.1982	11.1457	6.62222	3.99427	0.571212	-1.55115	-4.47079	-5.12838	0	0	0	0	0	0	0	33.0009	20.4206	21.3778
					1.88877	14.9562	18.3644	14.6854	11.722	9.31714	7.30559	5.63457	4.28858	3.21536	2.37028	1.75234	1.28742	0.983837	0.745596	0.584514	0.466193	0.377265	0.305818	0	4.92148	2.84093	14.4854	11.3689	6.7468	4.05841	0.581934	-1.57091	-4.50086	-5.13528	0	0	0	0	0	0	0	33.7968	20.93	21.8872
					1.90961	15.2228	18.5107	14.7974	11.8587	9.41371	7.36787	5.69193	4.29512	3.21946	2.37146	1.72853	1.22883	0.948636	0.704	0.538938	0.420384	0.350726	0.271163	0	4.96071	2.8626	14.6544	11.4867	6.80431	4.09973	0.582822	-1.57291	-4.5031	-5.06548	0	0	0	0	0	0	0	34.3098	21.2584	22.2156
					1.93044	15.4902	18.8082	15.0567	12.0768	9.58278	7.50885	5.78872	4.38668	3.28279	2.41031	1.76746	1.25248	0.969291	0.715387	0.545244	0.435856	0.356772	0.276336	0	5.04043	2.91276	14.924	11.693	6.93451	4.16944	0.595246	-1.60385	-4.57687	-5.17958	0	0	0	0	0	0	0	34.909	21.6419	22.5991
					1.95127	15.7595	18.9983	15.2447	12.2303	9.71443	7.64008	5.88398	4.46182	3.33716	2.45993	1.80729	1.28735	0.99614	0.735799	0.569012	0.44854	0.366525	0.288918	0	5.09137	2.94914	15.1136	11.8536	7.0557	4.23805	0.605442	-1.63042	-4.67108	-5.29629	0	0	0	0	0	0	0	35.3092	21.8979	22.8552
					1.97211	16.034	19.1942	15.4579	12.4417	9.91115	7.78273	6.0076	4.57068	3.42883	2.53321	1.86051	1.3451	1.03168	0.767081	0.593985	0.46769	0.377444	0.293251	0	5.14388	2.99038	15.3748	12.0937	7.18744	4.3271	0.620214	-1.6752	-4.81023	-5.45227	0	0	0	0	0	0	0	35.7998	22.2119	23.1691
					1.99294	16.3141	19.3615	15.648	12.5462	10.0449	7.90001	6.10604	4.63614	3.48428	2.58321	1.89972	1.38449	1.06609	0.791824	0.61685	0.486622	0.391557	0.307137	0	5.18871	3.02716	15.5039	12.2569	7.29575	4.398	0.629097	-1.7023	-4.90518	-5.56718	0	0	0	0	0	0	0	36.125	22.42	23.3773
					2.01377	16.5999	19.6878	15.8461	12.7836	10.2038	8.0294	6.21968	4.71811	3.54989	2.61284	1.92228	1.38259	1.06366	0.790526	0.605775	0.479518	0.386289	0.300559	0	5.27616	3.06548	15.7974	12.4508	7.41524	4.47985	0.64022	-1.73435	-4.96145	-5.63327	0	0	0	0	0	0	0	36.7961	22.8495	23.8068
					2.03461	16.8911	19.9029	16.0612	12.9463	10.3585	8.13074	6.29374	4.78556	3.58157	2.64738	1.93992	1.37618	1.07066	0.791131	0.603404	0.476991	0.38497	0.300208	0	5.33379	3.1071	15.9984	12.6396	7.50884	4.53319	0.649372	-1.74983	-5.02703	-5.68497	0	0	0	0	0	0	0	37.3085	23.1775	24.1347
					2.05544	17.1879	20.1457	16.2957	13.1651	10.519	8.25598	6.40526	4.86691	3.64767	2.69054	1.97615	1.39894	1.09036	0.801372	0.611716	0.480057	0.392681	0.302396	0	5.39886	3.15246	16.2688	12.8354	7.6245	4.61351	0.660411	-1.78212	-5.10898	-5.79115	0	0	0	0	0	0	0	37.8717	23.5379	24.4952
					2.07627	17.4901	19.2664	15.7692	12.8527	10.31	8.1435	6.3305	4.81114	3.6201	2.6752	1.96471	1.38849	1.07608	0.794231	0.606394	0.479484	0.390239	0.299604	0	5.16322	3.05061	15.8828	12.5804	7.52062	4.55967	0.652842	-1.76865	-5.07986	-5.75761	0	0	0	0	0	0	0	36.804	22.8546	23.8118
					2.09711	17.7977	19.5908	16.03	13.0517	10.514	8.32573	6.46738	4.91638	3.70742	2.72094	2.01355	1.41902	1.10664	0.811059	0.621672	0.485774	0.392761	0.302176	0	5.25017	3.10105	16.1286	12.8293	7.68892	4.65826	0.667124	-1.81131	-5.16671	-5.90075	0	0	0	0	0	0	0	37.4447	23.2647	24.2219
					2.11794	18.1108	19.8192	16.2217	13.2112	10.6261	8.41582	6.54381	4.98395	3.74305	2.75045	2.0217	1.43756	1.11286	0.820872	0.62186	0.490897	0.395709	0.304357	0	5.31136	3.13814	16.3257	12.9661	7.77211	4.71331	0.676292	-1.82872	-5.22275	-5.92462	0	0	0	0	0	0	0	37.9269	23.5733	24.5305
					2.13877	18.4291	20.0974	16.4386	13.4116	10.8037	8.55824	6.64313	5.07171	3.80458	2.81493	2.06825	1.45476	1.13537	0.835184	0.634294	0.499995	0.404737	0.310173	0	5.38593	3.1801	16.5734	13.1827	7.90364	4.78485	0.6882	-1.85878	-5.34519	-6.06104	0	0	0	0	0	0	0	38.4339	23.8977	24.855
					2.15961	18.7528	20.2721	16.6366	13.564	10.9401	8.67062	6.75526	5.13731	3.85928	2.8489	2.09471	1.48418	1.15489	0.851497	0.64656	0.509469	0.415243	0.32036	0	5.43275	3.2184	16.7618	13.3493	8.00742	4.86561	0.697102	-1.8855	-5.40969	-6.13858	0	0	0	0	0	0	0	38.8986	24.1951	25.1524
					2.18044	19.0818	20.5583	16.8779	13.7919	11.148	8.82976	6.87225	5.25526	3.94897	2.91249	2.14172	1.52212	1.17935	0.867557	0.663545	0.519665	0.422679	0.32192	0	5.50945	3.26507	17.0433	13.6028	8.15439	4.94988	0.713107	-1.92932	-5.53044	-6.27636	0	0	0	0	0	0	0	39.5019	24.5813	25.5385
					2.20127	19.4159	20.7298	16.9809	13.9616	11.2415	8.91014	6.94217	5.29969	3.98096	2.94309	2.1681	1.53286	1.1924	0.873766	0.664717	0.525978	0.426157	0.324675	0	5.5554	3.28501	17.2531	13.717	8.22862	5.00024	0.719136	-1.94495	-5.58855	-6.35367	0	0	0	0	0	0	0	39.8713	24.8177	25.7749
					2.22211	19.7553	20.9856	17.3186	14.1701	11.4613	9.08602	7.10319	5.41685	4.09284	3.0228	2.23218	1.59742	1.23356	0.91484	0.702382	0.548366	0.448252	0.33657	0	5.62395	3.35034	17.5106	13.9852	8.39105	5.11621	0.735033	-1.99962	-5.7399	-6.54146	0	0	0	0	0	0	0	40.4315	25.1762	26.1334
					2.24294	20.0998	21.2635	17.486	14.3483	11.6057	9.21505	7.21568	5.51655	4.15653	3.08395	2.2812	1.64783	1.27046	0.942827	0.724776	0.566757	0.456081	0.35631	0	5.69842	3.38271	17.7309	14.1614	8.51021	5.19724	0.748562	-2.03073	-5.85603	-6.68509	0	0	0	0	0	0	0	40.8576	25.4489	26.4061
					2.26377	20.4494	21.4785	17.7409	14.5731	11.8089	9.39335	7.33161	5.63034	4.26392	3.16884	2.34684	1.69564	1.29914	0.962809	0.74405	0.580773	0.466171	0.362683	0	5.75603	3.43203	18.0088	14.4094	8.67488	5.28074	0.764003	-2.0832	-6.01721	-6.87746	0	0	0	0	0	0	0	41.348	25.7628	26.72
					2.28462	20.8043	21.6955	17.928	14.6909	11.9709	9.53102	7.46199	5.70655	4.32667	3.21167	2.37187	1.71601	1.32465	0.979661	0.753386	0.58621	0.469283	0.363473	0	5.81419	3.46822	18.1543	14.607	8.80201	5.37465	0.774345	-2.11386	-6.09855	-6.95081	0	0	0	0	0	0	0	41.8314	26.0722	27.0294
					2.30545	21.1641	22.038	18.2103	15.0036	12.196	9.7338	7.61686	5.83295	4.41778	3.28392	2.42821	1.75943	1.35651	1.008	0.775234	0.609383	0.49225	0.378829	0	5.90598	3.52284	18.5407	14.8816	8.98928	5.4862	0.791496	-2.15837	-6.23574	-7.11592	0	0	0	0	0	0	0	42.6081	26.5693	27.5265
					2.32628	21.5288	22.2436	18.3981	15.1122	12.3363	9.80821	7.67589	5.88615	4.46127	3.3011	2.44987	1.77213	1.36001	1.00688	0.771671	0.606177	0.484416	0.374912	0	5.96108	3.55917	18.675	15.0529	9.058	5.52871	0.798715	-2.17961	-6.26837	-7.17939	0	0	0	0	0	0	0	43.0062	26.824	27.7812
					2.34712	21.8985	22.5578	18.677	15.3825	12.4851	9.95008	7.80783	5.97996	4.52388	3.35964	2.48196	1.78055	1.37637	1.01495	0.777846	0.607247	0.491562	0.375018	0	6.0453	3.61312	19.0089	15.2345	9.18902	5.62374	0.811445	-2.2102	-6.37953	-7.27344	0	0	0	0	0	0	0	43.6629	27.2443	28.2015
					2.36795	22.2731	22.7447	18.8807	15.5377	12.6292	10.0792	7.91649	6.05429	4.58157	3.38626	2.51113	1.8062	1.39198	1.02924	0.785255	0.61754	0.4924	0.376076	0	6.09538	3.65252	19.2007	15.4103	9.30826	5.70201	0.821531	-2.23839	-6.43007	-7.35892	0	0	0	0	0	0	0	44.1633	27.5646	28.5218
					2.38878	22.6526	23.0444	19.1509	15.7945	12.8881	10.2565	8.02874	6.15352	4.6545	3.46646	2.55832	1.84254	1.42187	1.05723	0.810007	0.634012	0.5125	0.393881	0	6.17568	3.70479	19.5181	15.7262	9.47198	5.78286	0.834996	-2.27402	-6.58235	-7.49721	0	0	0	0	0	0	0	44.861	28.0111	28.9683
					2.40962	23.037	23.2759	19.3405	15.9517	12.9683	10.3585	8.11655	6.23726	4.71654	3.49995	2.59732	1.8682	1.43923	1.07136	0.819485	0.639666	0.515304	0.396425	0	6.23772	3.74147	19.7124	15.824	9.56621	5.84611	0.846359	-2.30433	-6.64596	-7.61149	0	0	0	0	0	0	0	45.2125	28.236	29.1933
					2.43045	23.4261	23.5934	19.6415	16.2508	13.2172	10.5638	8.30662	6.35677	4.81892	3.57598	2.65417	1.91333	1.4747	1.09868	0.841758	0.662104	0.530722	0.410303	0	6.32281	3.79971	20.082	16.1278	9.75577	5.98301	0.862575	-2.35435	-6.79032	-7.77811	0	0	0	0	0	0	0	46.0108	28.747	29.7042
					2.45128	23.82	23.8812	19.8986	16.4486	13.3924	10.6784	8.38385	6.4505	4.8844	3.62252	2.67978	1.93874	1.49146	1.10884	0.843656	0.662226	0.535804	0.409899	0	6.39995	3.84945	20.3263	16.3415	9.86161	6.03864	0.875295	-2.38634	-6.87869	-7.85315	0	0	0	0	0	0	0	46.5746	29.1078	30.065
					2.47212	24.2187	24.214	20.1628	16.6653	13.6067	10.8701	8.52774	6.53536	4.95798	3.67727	2.73025	1.96659	1.51754	1.12642	0.859331	0.676319	0.541609	0.417883	0	6.48914	3.90055	20.5941	16.6031	10.0387	6.14228	0.886809	-2.42229	-6.98266	-8.00105	0	0	0	0	0	0	0	47.2486	29.5392	30.4964
					2.49295	24.622	24.4247	20.3736	16.8558	13.7268	11.0097	8.62942	6.63834	5.00512	3.72777	2.75943	1.97692	1.52929	1.12778	0.863878	0.67595	0.54409	0.419475	0	6.5456	3.94133	20.8295	16.7496	10.1676	6.21552	0.900783	-2.44532	-7.07855	-8.08655	0	0	0	0	0	0	0	47.7395	29.8533	30.8106
					2.51378	25.03	24.7134	20.6719	17.1549	14.0208	11.2471	8.85503	6.79028	5.16544	3.8607	2.87688	2.13782	1.62311	1.22834	0.949518	0.747464	0.596689	0.466306	0	6.62298	3.99904	21.1991	17.1083	10.3868	6.37801	0.9214	-2.52365	-7.33097	-8.43075	0	0	0	0	0	0	0	48.3303	30.2315	31.1887
					2.53462	25.4426	24.9379	20.9045	17.3717	14.1877	11.4029	8.96672	6.91348	5.26825	3.93751	2.95066	2.22111	1.67545	1.27959	0.993054	0.778599	0.612103	0.487505	0	6.68314	4.04404	21.4671	17.3119	10.5308	6.45846	0.938117	-2.57388	-7.47682	-8.64696	0	0	0	0	0	0	0	48.7359	30.491	31.4482
					2.55545	25.8597	25.3346	21.1966	17.6018	14.4052	11.586	9.12418	7.03212	5.33611	4.00833	2.9924	2.2506	1.69396	1.28532	0.998663	0.781236	0.615774	0.484795	0	6.78944	4.10055	21.7514	17.5773	10.6998	6.57187	0.954217	-2.60703	-7.6113	-8.76929	0	0	0	0	0	0	0	49.4571	30.9526	31.9098
					2.57628	26.2814	25.6	21.3862	17.7888	14.5579	11.7074	9.2272	7.13436	5.41718	4.0445	3.02763	2.27782	1.71369	1.30564	1.01325	0.789737	0.624808	0.491953	0	6.86057	4.13723	21.9825	17.7637	10.812	6.64607	0.96809	-2.64664	-7.67998	-8.87254	0	0	0	0	0	0	0	49.971	31.2815	32.2387
					2.59712	26.7076	25.9197	21.7306	18.0922	14.8438	11.9092	9.39096	7.26458	5.50518	4.13388	3.08701	2.33275	1.74883	1.33307	1.03356	0.810528	0.633549	0.504026	0	6.94625	4.20386	22.3574	18.1126	10.9983	6.76403	0.985759	-2.68963	-7.84969	-9.04656	0	0	0	0	0	0	0	50.7823	31.8008	32.758
					2.61795	27.1383	26.2497	22.0201	18.292	15.0164	12.0564	9.50182	7.33941	5.58618	4.17451	3.1134	2.32635	1.7556	1.32909	1.03353	0.807551	0.639773	0.503568	0	7.03468	4.25985	22.6043	18.3232	11.1342	6.84388	0.995913	-2.72921	-7.92685	-9.12387	0	0	0	0	0	0	0	51.4162	32.2064	33.1636
					2.63878	27.5734	26.5908	22.3423	18.6109	15.2372	12.2692	9.64183	7.44849	5.66462	4.2324	3.15238	2.34844	1.77445	1.3432	1.03154	0.809725	0.642624	0.497929	0	7.12609	4.32218	22.9984	18.5926	11.3308	6.94472	1.01072	-2.76753	-8.03678	-9.23812	0	0	0	0	0	0	0	52.2831	32.7612	33.7185
					2.65962	28.0128	26.8755	22.6032	18.8184	15.4122	12.3909	9.78484	7.54891	5.73909	4.30181	3.20113	2.3872	1.80081	1.3676	1.04994	0.821776	0.645984	0.506355	0	7.20239	4.37265	23.2548	18.8062	11.4431	7.04773	1.02434	-2.80391	-8.16857	-9.38097	0	0	0	0	0	0	0	52.7977	33.0906	34.0478
					2.68045	28.4566	27.3209	22.9624	19.1217	15.7343	12.6556	9.97894	7.70794	5.86678	4.39604	3.28541	2.46647	1.86531	1.40865	1.09284	0.858043	0.670336	0.530397	0	7.32177	4.44214	23.6297	19.1992	11.6876	7.18753	1.04592	-2.8663	-8.34751	-9.62796	0	0	0	0	0	0	0	53.6721	33.6502	34.6074
					2.70128	28.9047	27.5654	23.1885	19.3406	15.9072	12.7718	10.0776	7.79245	5.92496	4.42016	3.29853	2.4549	1.8553	1.40067	1.07496	0.843587	0.660529	0.519409	0	7.38728	4.48588	23.9002	19.4101	11.7949	7.25858	1.05739	-2.89472	-8.3933	-9.66642	0	0	0	0	0	0	0	54.3399	34.0776	35.0348
					2.72212	29.3571	28.0443	23.539	19.6033	16.1183	12.9596	10.162	7.85415	5.97385	4.4522	3.3077	2.41441	1.84156	1.37475	1.04949	0.812806	0.642895	0.499039	0	7.51561	4.55369	24.2248	19.6678	11.9683	7.31935	1.06576	-2.91861	-8.45415	-9.69327	0	0	0	0	0	0	0	55.2493	34.6596	35.6168
					2.74295	29.8137	28.3521	23.8814	19.8983	16.3013	13.0964	10.3176	7.95703	6.03104	4.49992	3.33903	2.42301	1.84904	1.37849	1.04776	0.818462	0.648704	0.496178	0	7.5981	4.61993	24.5893	19.891	12.0947	7.43149	1.07972	-2.94655	-8.54477	-9.78508	0	0	0	0	0	0	0	56.0279	35.1579	36.1151
					2.76378	30.2744	28.8089	24.3131	20.2772	16.6762	13.4022	10.5717	8.16213	6.17196	4.61007	3.43027	2.52336	1.9136	1.43547	1.09681	0.854194	0.67631	0.525409	0	7.72054	4.70344	25.0576	20.3485	12.3771	7.61449	1.10755	-3.0154	-8.75392	-10.0525	0	0	0	0	0	0	0	57.1074	35.8488	36.806
					2.78462	30.7394	28.9967	24.399	20.3688	16.7654	13.537	10.669	8.24377	6.25827	4.69733	3.49535	2.61185	1.97147	1.48168	1.14217	0.894285	0.701034	0.544124	0	7.77086	4.72007	25.1707	20.4573	12.5016	7.68457	1.11863	-3.05757	-8.91962	-10.2432	0	0	0	0	0	0	0	57.2033	35.9102	36.8674
					2.80545	31.2084	29.5424	24.9455	20.871	17.1555	13.7886	10.8953	8.40837	6.4163	4.82169	3.60598	2.7104	2.03928	1.55066	1.19548	0.933485	0.725238	0.57305	0	7.91709	4.82579	25.7914	20.9333	12.734	7.84757	1.14097	-3.13477	-9.15577	-10.5674	0	0	0	0	0	0	0	58.3321	36.6326	37.5898
					2.82628	31.6815	29.6674	25.0361	20.9156	17.1881	13.8193	10.9113	8.42467	6.38693	4.75088	3.53366	2.59214	1.96603	1.4684	1.12424	0.875418	0.695942	0.533348	0	7.95058	4.8433	25.8465	20.9731	12.7623	7.85907	1.14318	-3.12043	-9.0213	-10.3555	0	0	0	0	0	0	0	58.8809	36.9838	37.941
					2.84712	32.1586	30.4597	25.7049	21.4781	17.6478	14.2127	11.1769	8.62088	6.53764	4.86894	3.6139	2.62354	2.00326	1.4843	1.13056	0.876095	0.693414	0.529876	0	8.16291	4.9727	26.5416	21.5341	13.1256	8.05038	1.1698	-3.19406	-9.24548	-10.5906	0	0	0	0	0	0	0	60.5269	38.0373	38.9945
					2.86795	32.6398	30.5137	25.7802	21.5407	17.7464	14.2934	11.2884	8.71625	6.62509	4.93618	3.68488	2.71492	2.06473	1.54815	1.18785	0.921238	0.718196	0.562497	0	8.1774	4.98726	26.6189	21.6543	13.2002	8.1307	1.18274	-3.23678	-9.37316	-10.7986	0	0	0	0	0	0	0	60.5429	38.0475	39.0048
					2.88878	33.1249	30.9974	26.2272	21.9252	18.032	14.5095	11.4415	8.83625	6.72673	5.02548	3.74756	2.78025	2.10576	1.58508	1.21788	0.944679	0.743747	0.573133	0	8.30703	5.07373	27.0941	22.0029	13.3997	8.24094	1.19903	-3.28644	-9.54273	-10.9823	0	0	0	0	0	0	0	61.5059	38.6638	39.6211
					2.90962	33.6139	31.4175	26.5492	22.222	18.2966	14.7472	11.6373	8.98142	6.84119	5.11593	3.81914	2.844	2.13787	1.61405	1.23846	0.96113	0.754896	0.585202	0	8.41961	5.13602	27.4609	22.3257	13.6192	8.38201	1.21873	-3.34236	-9.71448	-11.1921	0	0	0	0	0	0	0	62.3132	39.1805	40.1378
					2.93046	34.1071	31.8857	26.9511	22.6086	18.609	14.9868	11.8135	9.1161	6.92903	5.16661	3.84134	2.81738	2.13555	1.59691	1.21671	0.942426	0.749327	0.571643	0	8.54508	5.21377	27.9386	22.7069	13.8405	8.50894	1.237	-3.38528	-9.81072	-11.2571	0	0	0	0	0	0	0	63.5377	39.9642	40.9214
					2.9513	34.6041	32.3005	27.3313	22.8876	18.8336	15.1651	11.9475	9.21431	7.00022	5.21858	3.88166	2.8438	2.16203	1.61034	1.22046	0.947605	0.745826	0.570902	0	8.65625	5.28732	28.2833	22.9809	14.0052	8.60544	1.25033	-3.42006	-9.90941	-11.3753	0	0	0	0	0	0	0	64.3639	40.493	41.4502
					2.97213	35.1096	32.697	27.7141	23.2068	19.1277	15.4159	12.1577	9.38696	7.11907	5.31744	3.95599	2.89308	2.19926	1.64414	1.24681	0.968143	0.757572	0.57401	0	8.76251	5.36138	28.6778	23.3398	14.2368	8.7568	1.27375	-3.47812	-10.0971	-11.5931	0	0	0	0	0	0	0	65.2405	41.054	42.0112
					2.99296	35.6249	32.9663	27.945	23.4498	19.321	15.5478	12.2835	9.49359	7.22109	5.39058	4.01842	2.95312	2.24111	1.67718	1.28246	0.991213	0.783683	0.606333	0	8.83467	5.40603	28.9781	23.5757	14.3586	8.84743	1.28822	-3.52796	-10.236	-11.776	0	0	0	0	0	0	0	65.7487	41.3792	42.3364
					3.0138	36.1497	33.5212	28.4694	23.8694	19.6742	15.8332	12.4966	9.63237	7.33898	5.46246	4.06855	2.99357	2.274	1.70179	1.29792	1.00795	0.794027	0.610391	0	8.98337	5.5075	29.4966	24.0067	14.6222	9.00093	1.30705	-3.58556	-10.3725	-11.923	0	0	0	0	0	0	0	67.0433	42.2078	43.165
					3.03463	36.6839	33.8977	28.7084	24.0583	19.801	15.938	12.5776	9.70106	7.35773	5.50249	4.09223	2.98271	2.28106	1.70029	1.29229	1.00404	0.789741	0.603294	0	9.08427	5.55373	29.73	24.1613	14.719	9.05924	1.31638	-3.59472	-10.4485	-11.9924	0	0	0	0	0	0	0	67.5883	42.5566	43.5138
					3.05546	37.2275	34.3009	29.1012	24.3935	20.1174	16.2226	12.8113	9.89195	7.52711	5.60932	4.16944	3.0507	2.3184	1.73335	1.32152	1.021	0.801274	0.608457	0	9.19233	5.62972	30.1442	24.5475	14.9818	9.22763	1.34228	-3.67748	-10.6514	-12.2186	0	0	0	0	0	0	0	68.518	43.1516	44.1088
					3.0763	37.7803	42.6605	34.9296	28.4403	22.8597	18.0299	14.025	10.7017	8.03282	5.94287	4.37589	3.18613	2.39907	1.77115	1.33633	1.03048	0.796567	0.607665	0	11.4326	6.75724	35.1451	27.8936	16.6509	10.1018	1.45216	-3.92455	-11.2847	-12.8236	0	0	0	0	0	0	0	81.4004	51.3964	52.3536
					3.09713	38.3421	43.8678	35.847	29.1568	23.3985	18.4998	14.3702	10.9581	8.23305	6.09291	4.49023	3.25394	2.45497	1.81202	1.36963	1.0523	0.820997	0.621883	0	11.7562	6.93471	36.0305	28.5511	17.0848	10.3504	1.48695	-4.02237	-11.5696	-13.1587	0	0	0	0	0	0	0	83.444	52.7042	53.6614
					3.11796	38.9128	44.4192	36.3654	29.5401	23.7312	18.7594	14.5717	11.1194	8.35035	6.17431	4.5564	3.29678	2.49358	1.83048	1.38231	1.06335	0.82851	0.623916	0	11.904	7.03499	36.5042	28.9571	17.3245	10.4955	1.50884	-4.07968	-11.7242	-13.3526	0	0	0	0	0	0	0	84.5726	53.4265	54.3838
					3.1388	39.4923	45.0263	36.8041	29.9633	24.0597	19.0115	14.7816	11.2645	8.47462	6.26373	4.61069	3.34548	2.52559	1.86334	1.4054	1.07964	0.841745	0.634402	0	12.0666	7.11986	37.0271	29.3579	17.5574	10.6467	1.52852	-4.14039	-11.894	-13.5117	0	0	0	0	0	0	0	85.758	54.1852	55.1424
					3.15963	40.0805	45.5783	37.2366	30.3438	24.3896	19.2571	14.9934	11.4365	8.59673	6.36386	4.69197	3.39668	2.56293	1.89219	1.42513	1.09191	0.849732	0.64274	0	12.2146	7.20354	37.4973	29.7604	17.7842	10.7993	1.55186	-4.20005	-12.0841	-13.7499	0	0	0	0	0	0	0	86.7771	54.8374	55.7946
					3.18046	40.6772	45.7696	37.4505	30.513	24.5347	19.4225	15.1016	11.5293	8.67215	6.42081	4.73902	3.43028	2.58921	1.92068	1.45099	1.11255	0.868995	0.655165	0	12.2658	7.24492	37.7064	29.9375	17.9369	10.8773	1.56446	-4.2369	-12.1923	-13.8878	0	0	0	0	0	0	0	87.2163	55.1185	56.0757
					3.2013	41.2823	46.2918	37.8866	30.837	24.8173	19.6405	15.2675	11.6689	8.77578	6.50071	4.78671	3.49781	2.63081	1.94413	1.47079	1.13409	0.882385	0.669144	0	12.4058	7.32927	38.1068	30.2823	18.1382	10.9968	1.5834	-4.28753	-12.344	-14.0275	0	0	0	0	0	0	0	88.1835	55.7375	56.6947
					3.22213	41.8957	46.7474	38.2456	31.1896	25.105	19.8873	15.4674	11.8188	8.88811	6.60455	4.87569	3.54344	2.66901	1.97793	1.49429	1.14922	0.898908	0.682802	0	12.5279	7.39873	38.5426	30.6333	18.3661	11.1407	1.60374	-4.34241	-12.5412	-14.2883	0	0	0	0	0	0	0	89.0412	56.2864	57.2437
					3.24296	42.5172	47.3578	38.8027	31.6706	25.5259	20.1916	15.725	11.9987	9.05066	6.6934	4.94192	3.59073	2.70545	1.99004	1.51272	1.15898	0.909775	0.692039	0	12.6915	7.5065	39.137	31.147	18.6472	11.3263	1.62815	-4.42183	-12.7099	-14.4824	0	0	0	0	0	0	0	90.4694	57.2005	58.1577
					3.2638	43.1467	47.9195	39.3697	32.1415	25.9579	20.5747	16.0348	12.258	9.22863	6.83191	5.05817	3.69014	2.77984	2.06283	1.56381	1.20071	0.932241	0.706838	0	12.842	7.61618	39.7189	31.6741	19.001	11.5494	1.66334	-4.50878	-12.9729	-14.8231	0	0	0	0	0	0	0	91.7602	58.0266	58.9838
					3.28463	43.7841	48.1067	39.4814	32.2348	26.0236	20.6385	16.0838	12.2888	9.27301	6.87567	5.09083	3.72437	2.80304	2.07186	1.57071	1.20793	0.935454	0.714425	0	12.8922	7.63779	39.8342	31.7542	19.0599	11.5847	1.66752	-4.53046	-13.056	-14.9188	0	0	0	0	0	0	0	91.9253	58.1322	59.0895
					3.30546	44.4293	48.7196	40.026	32.6917	26.3619	20.9018	16.3377	12.4989	9.41302	6.96996	5.15519	3.76399	2.82082	2.10383	1.5917	1.22698	0.958785	0.730015	0	13.0564	7.74316	40.3988	32.1671	19.303	11.7675	1.69602	-4.59886	-13.2351	-15.1074	0	0	0	0	0	0	0	93.1907	58.9421	59.8994
					3.3263	45.082	49.2303	40.5083	33.1419	26.7116	21.2499	16.5558	12.6625	9.5406	7.07068	5.23265	3.81526	2.83549	2.13364	1.6159	1.2386	0.963794	0.732844	0	13.1933	7.83645	40.9552	32.5937	19.6246	11.9246	1.71822	-4.66119	-13.4263	-15.3344	0	0	0	0	0	0	0	94.4241	59.7315	60.6887
					3.34713	45.7423	49.8193	40.9609	33.5042	27.0963	21.5235	16.7542	12.8233	9.67063	7.17585	5.3057	3.8713	2.91657	2.16685	1.63921	1.26594	0.982972	0.746789	0	13.3511	7.92401	41.4028	33.0632	19.8772	12.0675	1.74005	-4.72472	-13.626	-15.5485	0	0	0	0	0	0	0	95.5268	60.4372	61.3944
					3.36796	46.4099	50.3028	41.337	33.8015	27.3581	21.7542	16.9524	12.9828	9.78604	7.27582	5.38614	3.94116	2.976	2.20332	1.66958	1.27533	0.997971	0.763906	0	13.4807	7.99677	41.7702	33.3826	20.0903	12.2103	1.76169	-4.78111	-13.8158	-15.7842	0	0	0	0	0	0	0	96.3114	60.9394	61.8966
					3.3888	47.0847	50.8502	41.9142	34.3032	27.7235	22.0608	17.1859	13.1445	9.93743	7.3685	5.45007	3.98387	2.99737	2.228	1.68378	1.29153	1.00999	0.766968	0	13.6274	8.10842	42.3902	33.8285	20.3734	12.3785	1.78363	-4.85507	-13.9918	-15.9716	0	0	0	0	0	0	0	97.6716	61.8099	62.7671
					3.40963	47.7667	51.1905	42.2131	34.5523	27.9475	22.1803	17.3088	13.2778	10.0061	7.41664	5.48228	3.98694	3.00679	2.22908	1.68429	1.29202	1.01066	0.766714	0	13.7186	8.16625	42.698	34.1019	20.4838	12.467	1.80172	-4.8886	-14.0832	-16.0659	0	0	0	0	0	0	0	98.3994	62.2757	63.2329
					3.43046	48.4556	51.9298	42.8606	35.1652	28.4448	22.6199	17.6345	13.4986	10.1781	7.53684	5.57988	4.05606	3.0661	2.27442	1.72129	1.32327	1.03284	0.787736	0	13.9167	8.29152	43.4554	34.7086	20.8897	12.7016	1.83168	-4.97264	-14.3115	-16.3519	0	0	0	0	0	0	0	100.159	63.4019	64.3592
					3.4513	49.1513	52.2045	43.0822	35.3391	28.642	22.7438	17.7337	13.5655	10.2471	7.59746	5.62652	4.09391	3.09284	2.29104	1.73335	1.32993	1.03797	0.788584	0	13.9903	8.33438	43.6703	34.9493	21.0042	12.7731	1.84076	-5.00638	-14.4266	-16.4886	0	0	0	0	0	0	0	100.641	63.7101	64.6673
					3.47213	49.8537	52.8289	43.6657	35.7736	28.9886	23.0371	17.9712	13.7479	10.3721	7.69731	5.68756	4.1483	3.12743	2.32846	1.76	1.35657	1.05283	0.802814	0	14.1577	8.44726	44.2072	35.3722	21.275	12.9441	1.86551	-5.06741	-14.6162	-16.6675	0	0	0	0	0	0	0	101.918	64.5275	65.4847
					3.49296	50.5627	53.3156	44.0608	36.183	29.3199	23.2957	18.2029	13.9381	10.4915	7.8087	5.7676	4.21074	3.17526	2.36008	1.7916	1.37395	1.07828	0.822944	0	14.2881	8.52369	44.7132	35.7765	21.5138	13.111	1.89131	-5.12577	-14.8277	-16.9021	0	0	0	0	0	0	0	102.962	65.1957	66.153
					3.5138	51.2782	54.0162	44.6678	36.7142	29.7355	23.6716	18.4832	14.1498	10.6892	7.94888	5.89095	4.33835	3.25372	2.43832	1.85336	1.42838	1.10954	0.85035	0	14.4759	8.64111	45.3696	36.2836	21.861	13.3129	1.92005	-5.22237	-15.0939	-17.2636	0	0	0	0	0	0	0	104.284	66.042	66.9992
					3.53463	51.9999	54.401	45.0162	37.0253	30.0223	23.9291	18.678	14.3065	10.8221	8.05515	5.98501	4.44258	3.32252	2.49903	1.89722	1.4647	1.13768	0.879139	0	14.579	8.70852	45.7541	36.6335	22.0988	13.4532	1.94131	-5.28731	-15.2957	-17.5392	0	0	0	0	0	0	0	105.046	66.5296	67.4868
					3.55546	52.7279	54.9161	45.4815	37.4222	30.3586	24.1827	18.9035	14.4956	10.9737	8.19434	6.09607	4.56275	3.40458	2.57517	1.96663	1.5168	1.17266	0.914134	0	14.717	8.79853	46.2445	37.0438	22.333	13.6156	1.96696	-5.36137	-15.56	-17.8647	0	0	0	0	0	0	0	105.933	67.0974	68.0547
					3.57631	53.4623	55.3124	45.8154	37.7159	30.6508	24.4505	19.0879	14.6756	11.0977	8.29075	6.18684	4.63863	3.46531	2.62093	2.0047	1.54499	1.18837	0.921358	0	14.8232	8.86312	46.6074	37.4004	22.5803	13.7484	1.99139	-5.42196	-15.7431	-18.1307	0	0	0	0	0	0	0	106.719	67.6	68.5572
					3.59714	54.2022	55.9263	46.4421	38.297	31.0974	24.8239	19.4055	14.8721	11.2607	8.40797	6.26703	4.70046	3.50006	2.65162	2.02979	1.56144	1.20555	0.93709	0	14.9877	8.98437	47.3255	37.9454	22.9252	13.9772	2.01805	-5.50157	-15.9656	-18.3657	0	0	0	0	0	0	0	108.331	68.6317	69.5889
					3.61797	54.9479	56.4722	46.8478	38.5966	31.3527	24.9397	19.5276	14.9853	11.3442	8.46128	6.28902	4.69092	3.51524	2.64151	2.02547	1.56421	1.21205	0.94118	0	15.1341	9.06284	47.6957	38.2569	23.0321	14.0651	2.03341	-5.54239	-16.0669	-18.4301	0	0	0	0	0	0	0	109.241	69.2142	70.1714
					3.63881	55.6992	57.2649	47.5083	39.1432	31.8006	25.3906	19.8538	15.2237	11.5355	8.60734	6.39722	4.78785	3.57325	2.70009	2.06563	1.59763	1.23315	0.956944	0	15.3465	9.19062	48.3712	38.8035	23.4485	14.3001	2.06576	-5.63583	-16.3442	-18.7472	0	0	0	0	0	0	0	110.799	70.2114	71.1686
					3.65964	56.4561	57.5399	47.8361	39.4119	32.0315	25.5269	19.9988	15.3511	11.6425	8.70014	6.48758	4.87809	3.63858	2.75466	2.11039	1.63042	1.25976	0.986445	0	15.4202	9.25403	48.7033	39.0852	23.5744	14.4045	2.08305	-5.68811	-16.5204	-19.012	0	0	0	0	0	0	0	111.304	70.5347	71.4919
					3.68047	57.2184	58.1554	48.4281	39.939	32.4458	25.8899	20.2691	15.5382	11.7753	8.79285	6.54047	4.90808	3.66092	2.76598	2.11568	1.63848	1.2641	0.986108	0	15.5851	9.36857	49.3546	39.5907	23.9096	14.5992	2.10844	-5.75297	-16.6965	-19.167	0	0	0	0	0	0	0	112.9	71.5559	72.5132
					3.70131	57.986	58.6908	48.8884	40.3253	32.7921	26.1475	20.4483	15.6977	11.8683	8.84111	6.58828	4.90452	3.66632	2.76615	2.10906	1.63487	1.26424	0.984514	0	15.7286	9.45761	49.8319	40.0132	24.1475	14.7283	2.13008	-5.79844	-16.7881	-19.3071	0	0	0	0	0	0	0	114.144	72.352	73.3092
					3.72214	58.7586	59.4159	49.4647	40.7996	33.1514	26.4456	20.715	15.8956	12.0043	8.96923	6.661	4.97327	3.71635	2.79889	2.13001	1.65028	1.27807	0.992194	0	15.9229	9.56909	50.4181	40.4517	24.4228	14.9204	2.15694	-5.86488	-17.0314	-19.5202	0	0	0	0	0	0	0	115.446	73.1852	74.1424
					3.74297	59.5363	60.088	50.015	41.2746	33.5675	26.736	20.9065	16.0323	12.1015	9.02181	6.68712	4.95333	3.7154	2.79296	2.12392	1.64289	1.26761	0.980068	0	16.103	9.67555	51.0051	40.9594	24.691	15.0583	2.17549	-5.91238	-17.1312	-19.5967	0	0	0	0	0	0	0	117.028	74.1977	75.1549
					3.76381	60.3189	60.5896	50.4827	41.6772	33.8913	27.0159	21.1065	16.1666	12.2105	9.08613	6.73776	4.94439	3.72438	2.78239	2.10941	1.62379	1.25498	0.963948	0	16.2375	9.76603	51.5026	41.3545	24.9495	15.2023	2.19371	-5.96559	-17.2534	-19.7451	0	0	0	0	0	0	0	118.242	74.975	75.9322
					3.78464	61.1062	61.1246	50.9418	42.0331	34.1488	27.2451	21.3211	16.3277	12.3238	9.1748	6.78854	4.98132	3.74855	2.79962	2.12138	1.62898	1.27377	0.962316	0	16.3809	9.85484	51.9424	41.6688	25.1612	15.3569	2.21557	-6.02094	-17.4218	-19.8939	0	0	0	0	0	0	0	119.244	75.6162	76.5734
					3.80547	61.8982	61.8177	51.462	42.4825	34.5712	27.5513	21.5315	16.5265	12.4637	9.27599	6.86721	5.03646	3.79699	2.83466	2.16059	1.64743	1.28531	0.987358	0	16.5666	9.95548	52.4977	42.1841	25.444	15.5085	2.24255	-6.08933	-17.6139	-20.1245	0	0	0	0	0	0	0	120.571	76.4656	77.4229
					3.82631	62.6946	62.2119	51.9122	42.8626	34.8848	27.847	21.7962	16.6976	12.6297	9.42483	6.98374	5.16682	3.88371	2.91369	2.21654	1.70461	1.32086	1.02077	0	16.6722	10.0426	52.9674	42.5668	25.717	15.6991	2.26577	-6.17044	-17.8965	-20.466	0	0	0	0	0	0	0	121.398	76.9948	77.952
					3.84714	63.4953	62.917	52.5042	43.4009	35.342	28.2106	22.0786	16.9168	12.7961	9.54296	7.08749	5.28387	3.9561	2.97899	2.26534	1.74635	1.35048	1.05144	0	16.8612	10.1571	53.6327	43.1247	26.0528	15.9025	2.29551	-6.25171	-18.1208	-20.77	0	0	0	0	0	0	0	122.884	77.9458	78.903
					3.86797	64.3003	63.4096	52.9597	43.7523	35.6598	28.4496	22.2644	17.0878	12.9336	9.66585	7.17667	5.34063	4.00905	3.02273	2.29543	1.77952	1.37399	1.06696	0	16.9932	10.2452	54.0669	43.5124	26.2736	16.0364	2.31872	-6.3189	-18.3542	-21.0314	0	0	0	0	0	0	0	123.742	78.495	79.4522
					3.88881	65.1094	64.14	53.5767	44.2702	36.0819	28.8247	22.5256	17.2727	13.0388	9.74101	7.24075	5.36469	4.02464	3.02831	2.30663	1.7774	1.37089	1.06367	0	17.1889	10.3646	54.7069	44.0276	26.62	16.2245	2.3438	-6.37029	-18.4969	-21.2192	0	0	0	0	0	0	0	125.39	79.5495	80.5068
					3.90964	65.9225	64.6837	54.0459	44.6843	36.3531	28.9817	22.7012	17.387	13.1389	9.78483	7.24959	5.34231	4.02234	3.01695	2.28744	1.76083	1.35954	1.04555	0	17.3346	10.4553	55.2187	44.3584	26.765	16.351	2.35932	-6.4192	-18.5801	-21.2451	0	0	0	0	0	0	0	126.598	80.3228	81.28
					3.93047	66.7393	65.3331	54.6734	45.1944	36.8069	29.3559	22.9646	17.6189	13.3034	9.92823	7.36146	5.42667	4.0871	3.06045	2.32608	1.79954	1.39895	1.06337	0	17.5087	10.5767	55.849	44.9122	27.1105	16.5407	2.39078	-6.49957	-18.8524	-21.5729	0	0	0	0	0	0	0	127.964	81.1968	82.154
					3.95131	67.5599	65.8411	55.1349	45.6507	37.1059	29.5993	23.1842	17.7561	13.4233	10.0042	7.41738	5.45432	4.10902	3.07692	2.33586	1.80078	1.40442	1.07784	0	17.6448	10.666	56.4128	45.277	27.3353	16.6989	2.4094	-6.55814	-18.9967	-21.7368	0	0	0	0	0	0	0	129.153	81.9578	82.915
					3.97214	68.391	66.5402	55.6825	46.0845	37.5814	29.9783	23.4716	18.0182	13.6332	10.1584	7.53548	5.54449	4.18457	3.13939	2.38714	1.83687	1.4283	1.09418	0	17.8322	10.7719	56.949	45.8571	27.6853	16.9059	2.44496	-6.66071	-19.2894	-22.0829	0	0	0	0	0	0	0	130.413	82.7647	83.7219
					3.99297	69.2521	67.0067	56.151	46.5486	37.8911	30.2599	23.7027	18.1889	13.758	10.2678	7.62566	5.61431	4.22753	3.17824	2.4111	1.85543	1.44542	1.11251	0	17.9572	10.8626	57.5225	46.2351	27.9454	17.0723	2.46813	-6.72168	-19.4972	-22.3472	0	0	0	0	0	0	0	131.497	83.4582	84.4154
					4.01407	70.1548	67.7104	56.7751	47.0683	38.3223	30.6383	23.9734	18.404	13.9119	10.3746	7.71151	5.69707	4.2975	3.22895	2.44852	1.88762	1.477	1.13221	0	18.1458	10.9833	58.1646	46.7613	28.2949	17.2673	2.49732	-6.79688	-19.7001	-22.5987	0	0	0	0	0	0	0	133.019	84.4321	85.3893
					4.03491	71.0748	68.1513	57.2573	47.4489	38.7106	30.8635	24.2128	18.5873	14.0481	10.4821	7.79394	5.74079	4.33138	3.24649	2.46205	1.90524	1.46918	1.12974	0	18.2639	11.0766	58.635	47.2351	28.5028	17.4398	2.52219	-6.86338	-19.9041	-22.8403	0	0	0	0	0	0	0	134.068	85.1034	86.0606
					4.05574	72.0219	69.0498	57.9697	48.0528	39.2001	31.3312	24.4981	18.7994	14.2387	10.6092	7.89318	5.82127	4.38953	3.281	2.49797	1.92539	1.49575	1.14304	0	18.5047	11.2144	59.3813	47.8323	28.9347	17.6452	2.55097	-6.95651	-20.1455	-23.1311	0	0	0	0	0	0	0	135.83	86.2315	87.1888
					4.07657	72.9945	62.2018	53.8113	45.6137	37.7412	30.4978	24.0576	18.5708	14.116	10.5565	7.87235	5.79659	4.38158	3.28198	2.49513	1.92534	1.4957	1.14295	0	16.6695	10.41	56.3671	46.0522	28.1651	17.3279	2.51994	-6.89656	-20.0453	-23.0701	0	0	0	0	0	0	0	127.5	80.8999	81.8572
					4.09741	73.9914	64.885	55.7951	47.0903	38.8127	31.2634	24.6239	18.9954	14.4188	10.7722	8.01256	5.89665	4.46257	3.34224	2.53234	1.94608	1.51618	1.15726	0	17.3886	10.7937	58.1918	47.3596	28.8721	17.7358	2.57756	-7.04451	-20.4549	-23.481	0	0	0	0	0	0	0	131.939	83.741	84.6982
					4.11824	75.011	66.0373	56.6827	47.7425	39.3856	31.6688	24.9041	19.1805	14.5454	10.8751	8.08984	5.97455	4.49652	3.35703	2.55677	1.97215	1.52731	1.166	0	17.6974	10.9654	58.9979	48.0587	29.2465	17.9377	2.60269	-7.10636	-20.6504	-23.7074	0	0	0	0	0	0	0	134.042	85.087	86.0442
					4.13907	76.0519	67.3639	57.6328	48.556	40.0066	32.1787	25.273	19.4847	14.7824	11.0215	8.21241	6.04604	4.56193	3.41748	2.59924	1.997	1.54778	1.1942	0	18.0529	11.1492	60.003	48.8165	29.7175	18.2034	2.64395	-7.22213	-20.9283	-24.0666	0	0	0	0	0	0	0	136.369	86.5765	87.5337
					4.15991	77.1127	68.2758	58.3493	49.0487	40.3915	32.4668	25.5226	19.6463	14.8989	11.1192	8.27278	6.09714	4.59635	3.44522	2.61362	2.01473	1.56442	1.18835	0	18.2973	11.2878	60.6119	49.2861	29.9835	18.3831	2.66589	-7.27905	-21.1139	-24.2436	0	0	0	0	0	0	0	137.879	87.5427	88.4999
					4.18075	78.1925	69.3868	59.2909	49.7878	40.9546	32.8695	25.8021	19.8961	15.0739	11.2626	8.36176	6.16684	4.65546	3.48846	2.64653	2.03505	1.57565	1.21189	0	18.595	11.47	61.5253	49.9732	30.3553	18.5844	2.69978	-7.36459	-21.3863	-24.5043	0	0	0	0	0	0	0	139.948	88.8668	89.824
					4.20159	79.2887	70.0124	59.8127	50.2505	41.3364	33.1961	26.1102	20.1042	15.2303	11.3651	8.45226	6.22614	4.70737	3.53617	2.68857	2.07198	1.60303	1.22925	0	18.7627	11.5709	62.0971	50.439	30.657	18.8064	2.72802	-7.44098	-21.5808	-24.7695	0	0	0	0	0	0	0	141.27	89.7129	90.6701
					4.22242	80.4005	71.1096	60.7422	51.0136	41.8896	33.6466	26.4261	20.335	15.4155	11.5443	8.5914	6.34213	4.7861	3.58317	2.71974	2.09915	1.61656	1.25223	0	19.0567	11.7508	63.0401	51.1141	31.0731	19.0339	2.75934	-7.53144	-21.9211	-25.1773	0	0	0	0	0	0	0	143.198	90.9469	91.9042
					4.24325	81.5263	71.8304	61.2916	51.483	42.366	33.9943	26.7272	20.5931	15.6003	11.6567	8.68318	6.42852	4.84748	3.63321	2.76614	2.13011	1.64823	1.26889	0	19.2499	11.857	63.6201	51.6954	31.3941	19.2508	2.79435	-7.62176	-22.1346	-25.4462	0	0	0	0	0	0	0	144.659	91.8819	92.8392
					4.26409	82.6648	72.753	62.149	52.1777	42.8947	34.4414	27.0958	20.8642	15.8086	11.8301	8.80649	6.5139	4.90596	3.69366	2.80301	2.15944	1.66207	1.27479	0	19.4971	12.0229	64.4785	52.3406	31.8071	19.5163	2.83115	-7.72354	-22.4638	-25.8076	0	0	0	0	0	0	0	146.499	93.0592	94.0165
					4.28492	83.8145	73.4864	62.7245	52.6496	43.2823	34.7308	27.3425	21.0334	15.949	11.927	8.88674	6.5631	4.95492	3.7157	2.82334	2.18276	1.68431	1.29403	0	19.6937	12.1342	65.0617	52.8135	32.0743	19.694	2.85411	-7.79212	-22.6478	-26.0428	0	0	0	0	0	0	0	147.843	93.9195	94.8767
					4.30575	84.974	74.6409	63.6751	53.4328	43.8848	35.2423	27.7135	21.3332	16.1651	12.0857	9.00305	6.64685	5.01327	3.7629	2.86386	2.20088	1.70522	1.30828	0	20.0031	12.3181	66.0295	53.5487	32.5467	19.9612	2.89479	-7.89766	-22.9492	-26.3836	0	0	0	0	0	0	0	150.072	95.3459	96.3031
					4.32659	86.1419	75.2104	64.2739	53.9097	44.273	35.5407	27.9296	21.4874	16.2996	12.1773	9.05936	6.69821	5.06199	3.79365	2.88355	2.22521	1.71733	1.3167	0	20.1557	12.434	66.6189	54.0223	32.8222	20.1168	2.91572	-7.9634	-23.1231	-26.5486	0	0	0	0	0	0	0	151.451	96.2285	97.1857
					4.34742	87.3166	76.0603	64.868	54.4613	44.7384	35.9496	28.2283	21.7335	16.473	12.327	9.17945	6.78068	5.11773	3.84193	2.92089	2.23909	1.72325	1.31879	0	20.3835	12.5489	67.3005	54.5902	33.1999	20.332	2.94911	-8.04811	-23.4073	-26.9006	0	0	0	0	0	0	0	152.948	97.1869	98.1441
					4.36825	88.4968	76.7353	65.467	54.9072	45.0696	36.2005	28.4541	21.9199	16.5922	12.4299	9.26398	6.85026	5.16712	3.86965	2.94656	2.26087	1.75505	1.35376	0	20.5644	12.6648	67.8516	54.9944	33.4316	20.4946	2.9744	-8.10633	-23.6027	-27.1483	0	0	0	0	0	0	0	154.118	97.9359	98.8931
					4.38909	89.681	77.6746	66.2825	55.5014	45.6889	36.6552	28.8039	22.1884	16.8092	12.5667	9.35359	6.93506	5.22235	3.90845	2.97759	2.28906	1.76808	1.35503	0	20.8161	12.8225	68.5858	55.7501	33.8515	20.7466	3.01083	-8.21235	-23.8626	-27.4109	0	0	0	0	0	0	0	156.098	99.2025	100.16
					4.40992	90.8678	78.4149	66.8237	56.0702	46.0921	36.9728	29.0499	22.3555	16.9536	12.6842	9.44581	6.99064	5.27298	3.96131	3.01373	2.32175	1.78751	1.37165	0	21.0145	12.9272	69.2887	56.2421	34.1448	20.9237	3.0335	-8.28293	-24.0857	-27.6811	0	0	0	0	0	0	0	157.525	100.116	101.073
					4.43075	92.0557	79.1755	67.6286	56.703	46.5412	37.3246	29.3197	22.5783	17.1174	12.7993	9.52566	7.03857	5.3053	3.98512	3.02485	2.33374	1.80373	1.37346	0	21.2183	13.083	70.0707	56.79	34.4698	21.1181	3.06373	-8.36295	-24.3042	-27.9151	0	0	0	0	0	0	0	159.231	101.208	102.165
					4.45159	93.2433	79.9088	68.1717	57.107	46.9249	37.6042	29.527	22.7106	17.2264	12.8761	9.59144	7.08489	5.35228	4.01507	3.04781	2.3348	1.80888	1.38226	0	21.4149	13.188	70.57	57.2583	34.7279	21.2674	3.08169	-8.4162	-24.45	-28.1079	0	0	0	0	0	0	0	160.534	102.042	102.999
					4.47242	94.4292	80.8318	69.0286	57.8392	47.4793	38.0605	29.8574	22.9647	17.4299	13.0178	9.69811	7.15313	5.39844	4.04213	3.06445	2.36196	1.82481	1.39355	0	21.6622	13.3538	71.4748	57.9348	35.1493	21.5054	3.11617	-8.51561	-24.7192	-28.4205	0	0	0	0	0	0	0	162.541	103.326	104.284
					4.49325	95.6119	81.5761	69.6542	58.3322	47.8636	38.3719	30.1352	23.1842	17.5623	13.126	9.76684	7.21827	5.45356	4.08491	3.10087	2.39401	1.85791	1.40186	0	21.8617	13.4748	72.084	58.4037	35.4369	21.7055	3.14596	-8.58029	-24.9245	-28.6219	0	0	0	0	0	0	0	163.986	104.251	105.208
					4.51409	96.7899	82.3851	70.3473	58.9501	48.4102	38.8435	30.5214	23.5009	17.8311	13.3375	9.96549	7.41805	5.57594	4.20908	3.20669	2.47016	1.90594	1.46615	0	22.0785	13.6089	72.8476	59.0707	35.8724	21.9837	3.18893	-8.71165	-25.3261	-29.2041	0	0	0	0	0	0	0	165.409	105.162	106.119
					4.53492	97.9619	83.0313	70.8895	59.3851	48.7955	39.1293	30.7163	23.6957	17.9643	13.4495	10.027	7.48451	5.63138	4.24968	3.24547	2.50192	1.92859	1.48171	0	22.2516	13.7138	73.3851	59.5407	36.1364	22.1241	3.21536	-8.7767	-25.5388	-29.3845	0	0	0	0	0	0	0	166.667	105.967	106.924
					4.55575	99.1264	83.8001	71.5355	60.0099	49.3263	39.5774	31.0838	23.9279	18.179	13.6253	10.1892	7.66253	5.73931	4.33978	3.31224	2.55787	1.96539	1.50217	0	22.4577	13.8388	74.1572	60.1885	36.5502	22.3888	3.24688	-8.88159	-25.8726	-29.8595	0	0	0	0	0	0	0	168.214	106.957	107.914
					4.57659	100.282	84.3503	72.018	60.4134	49.5767	39.8061	31.2643	24.078	18.2785	13.7155	10.2418	7.71412	5.76486	4.3744	3.34282	2.5705	1.97101	1.53267	0	22.6051	13.9321	74.6559	60.494	36.7614	22.5187	3.26725	-8.93023	-26.0439	-30.0139	0	0	0	0	0	0	0	169.246	107.618	108.575
					4.59742	101.427	85.4407	72.9194	61.1543	50.1979	40.259	31.5942	24.3357	18.4623	13.8535	10.3386	7.73003	5.80162	4.38046	3.35754	2.58743	1.98382	1.53726	0	22.8973	14.1065	75.5715	61.2519	37.1797	22.7563	3.30221	-9.02	-26.306	-30.2976	0	0	0	0	0	0	0	171.442	109.023	109.98
					4.61825	102.56	85.8088	73.3361	61.4867	50.4573	40.5047	31.8324	24.4888	18.5747	13.9201	10.3996	7.79753	5.84239	4.41187	3.38071	2.59821	1.99986	1.54315	0	22.996	14.1871	75.9822	61.5685	37.4066	22.9279	3.32298	-9.07495	-26.4324	-30.4762	0	0	0	0	0	0	0	172.408	109.641	110.598
					4.63909	103.68	86.8786	74.1475	62.22	51.0661	40.9013	32.0551	24.7311	18.7558	14.0586	10.5164	7.88239	5.9092	4.46516	3.41313	2.6246	2.01966	1.55775	0	23.2827	14.344	76.8883	62.3113	37.7728	23.0884	3.35586	-9.1634	-26.6954	-30.8184	0	0	0	0	0	0	0	174.366	110.894	111.852
					4.65992	104.786	87.403	74.6913	62.5816	51.2903	41.1238	32.3052	24.8845	18.8937	14.0841	10.5688	7.90488	5.93868	4.48294	3.41935	2.63525	2.02525	1.56263	0	23.4232	14.4493	77.3353	62.5849	37.9783	23.2684	3.37668	-9.23076	-26.7438	-30.9721	0	0	0	0	0	0	0	175.469	111.601	112.558
					4.68075	105.875	88.2331	75.4044	63.2042	51.9071	41.5369	32.6233	25.1055	19.0329	14.2684	10.6459	7.93859	5.95378	4.50386	3.43652	2.63958	2.03293	1.56637	0	23.6457	14.5872	78.1046	63.3375	38.3598	23.4976	3.40666	-9.29877	-27.0939	-31.198	0	0	0	0	0	0	0	177.348	112.803	113.76
					4.70159	106.947	88.8531	75.8792	63.5953	52.1405	41.8154	32.7898	25.2363	19.1162	14.3333	10.6976	7.93989	5.97787	4.50043	3.41967	2.6309	2.02397	1.5536	0	23.8118	14.679	78.5879	63.6224	38.617	23.6175	3.42442	-9.33949	-27.2171	-31.3494	0	0	0	0	0	0	0	178.454	113.511	114.468
					4.72242	107.999	89.8075	76.5847	64.2096	52.6599	42.216	33.0427	25.4493	19.2764	14.4199	10.7325	7.95108	5.99434	4.51596	3.43129	2.63515	2.03912	1.55057	0	24.0676	14.8155	79.3471	64.2561	38.987	23.7997	3.45331	-9.41778	-27.3815	-31.4517	0	0	0	0	0	0	0	180.475	114.804	115.761
					4.74325	109.031	90.1637	77.0433	64.5534	52.9468	42.3969	33.2353	25.5744	19.3846	14.5114	10.8188	7.99871	6.04714	4.54303	3.44754	2.65464	2.05232	1.56725	0	24.163	14.9043	79.7719	64.6062	39.1541	23.9384	3.4703	-9.47062	-27.5552	-31.7047	0	0	0	0	0	0	0	181.278	115.318	116.275
					4.76409	110.041	91.0746	77.775	65.1743	53.5058	42.8821	33.61	25.8603	19.6201	14.6768	10.9735	8.17585	6.14269	4.63807	3.53414	2.71831	2.09076	1.60611	0	24.4072	15.0458	80.5391	65.2883	39.6021	24.2082	3.50909	-9.58566	-27.8694	-32.1581	0	0	0	0	0	0	0	182.987	116.412	117.369
					4.78492	111.028	91.5492	78.2225	65.6135	53.8338	43.1313	33.8191	26.0211	19.7409	14.8001	11.0419	8.23866	6.20151	4.67669	3.5608	2.74313	2.11083	1.62026	0	24.5344	15.1324	81.0819	65.6885	39.8322	24.3589	3.53091	-9.64469	-28.1036	-32.3586	0	0	0	0	0	0	0	184.052	117.094	118.051
					4.80575	111.99	92.3547	78.9472	66.2149	54.3606	43.5254	34.0886	26.2123	19.8822	14.9118	11.1444	8.32977	6.25687	4.72178	3.58101	2.76373	2.13429	1.64144	0	24.7502	15.2726	81.825	66.3314	40.1962	24.553	3.55685	-9.71373	-28.3155	-32.6588	0	0	0	0	0	0	0	185.797	118.21	119.168
					4.8266	112.926	92.8391	79.2768	66.5816	54.5496	43.7433	34.2969	26.3654	20.0154	14.975	11.2137	8.38506	6.29984	4.75456	3.62738	2.79448	2.14757	1.65856	0	24.88	15.3363	82.2782	66.5619	40.3975	24.7031	3.57763	-9.77881	-28.4355	-32.862	0	0	0	0	0	0	0	186.658	118.761	119.719
					4.84743	113.835	93.8665	80.188	67.1314	55.005	44.1036	34.5511	26.5504	20.1947	15.1146	11.3189	8.45611	6.35423	4.80284	3.66131	2.82114	2.16681	1.66577	0	25.1554	15.5126	82.9576	67.1177	40.7302	24.8861	3.60272	-9.86639	-28.7006	-33.1704	0	0	0	0	0	0	0	188.225	119.764	120.721
					4.86826	114.713	94.3636	80.6056	67.5467	55.3763	44.3962	34.8013	26.7744	20.2412	15.2159	11.3645	8.49517	6.38881	4.82939	3.68207	2.83487	2.183	1.66861	0	25.2886	15.5934	83.4709	67.5707	41.0004	25.0663	3.63313	-9.88912	-28.893	-33.304	0	0	0	0	0	0	0	189.537	120.604	121.561
					4.8891	115.562	95.0624	81.239	68.0649	55.8376	44.6851	35.0908	27.0119	20.5281	15.3835	11.4537	8.59022	6.46248	4.87317	3.74071	2.87425	2.20636	1.69217	0	25.4759	15.7159	84.1113	68.1336	41.2673	25.2749	3.66535	-10.0293	-29.2112	-33.5654	0	0	0	0	0	0	0	190.838	121.437	122.394
					4.90993	116.378	95.6238	81.7093	68.4019	56.1485	45.0068	35.2744	27.1316	20.6479	15.4644	11.5701	8.65431	6.52237	4.92847	3.7578	2.88606	2.22057	1.70634	0	25.6263	15.8069	84.5276	68.5129	41.5644	25.4071	3.68159	-10.0878	-29.3648	-33.9064	0	0	0	0	0	0	0	191.768	122.031	122.989
					4.93076	117.161	96.4588	82.3192	68.9805	56.582	45.3361	35.5587	27.3882	20.7477	15.5661	11.6353	8.70582	6.56748	4.95363	3.76585	2.9101	2.23875	1.71819	0	25.8501	15.9249	85.2426	69.042	41.8684	25.6119	3.71641	-10.1366	-29.558	-34.0974	0	0	0	0	0	0	0	193.464	123.117	124.074
					4.9516	117.909	96.905	82.8126	69.3831	56.9421	45.5761	35.7367	27.5406	20.8893	15.6462	11.7047	8.7238	6.57279	4.94052	3.76246	2.90206	2.23393	1.70049	0	25.9697	16.0203	85.7401	69.4813	42.0901	25.7401	3.73709	-10.2058	-29.7101	-34.3007	0	0	0	0	0	0	0	194.562	123.82	124.777
					4.97243	118.621	97.8947	83.6147	70.0421	57.4137	45.9733	35.9973	27.7008	21.0216	15.7587	11.7704	8.74997	6.59271	4.95737	3.77806	2.90143	2.23209	1.69828	0	26.2349	16.1755	86.5545	70.0568	42.4569	25.9278	3.75883	-10.2704	-29.9237	-34.4934	0	0	0	0	0	0	0	196.478	125.046	126.003
					4.99326	119.295	98.2003	83.8035	70.292	57.5992	46.1484	36.1972	27.874	21.1551	15.8455	11.8363	8.82289	6.64544	5.01218	3.81194	2.93015	2.26091	1.70818	0	26.3168	16.212	86.8633	70.2831	42.6186	26.0718	3.78233	-10.3356	-30.0885	-34.6865	0	0	0	0	0	0	0	197.037	125.404	126.361
					5.0141	119.936	99.0804	84.6781	70.8874	58.0977	46.5219	36.4904	28.0667	21.3302	15.9744	11.9168	8.86966	6.69768	5.03962	3.82704	2.9418	2.26154	1.72713	0	26.5526	16.3812	87.5991	70.8914	42.9635	26.2829	3.80848	-10.4211	-30.3333	-34.9225	0	0	0	0	0	0	0	198.802	126.534	127.491
					5.03493	120.576	99.3876	85.0309	71.1878	58.4036	46.7219	36.664	28.2144	21.4229	16.0679	11.9839	8.89526	6.73767	5.06427	3.85174	2.95785	2.2664	1.73358	0	26.635	16.4495	87.9703	71.2647	43.1483	26.408	3.82853	-10.4665	-30.5109	-35.1192	0	0	0	0	0	0	0	199.608	127.049	128.006
					5.05576	121.218	100.218	85.6155	71.7351	58.766	47.0977	36.865	28.4448	21.5647	16.1665	12.0935	8.99004	6.78164	5.11821	3.89883	2.98247	2.28948	1.74573	0	26.8575	16.5626	88.6466	71.7069	43.4953	26.5528	3.85979	-10.5357	-30.6981	-35.4404	0	0	0	0	0	0	0	201.007	127.945	128.902
					5.0766	121.862	90.1224	78.9433	67.2823	55.8232	45.1182	35.6254	27.64	21.0567	15.8421	11.871	8.84765	6.68272	5.03593	3.83438	2.9339	2.26909	1.73181	0	24.152	15.2718	83.1441	68.116	41.6672	25.6599	3.75058	-10.2875	-30.082	-34.7883	0	0	0	0	0	0	0	186.604	118.726	119.684
					5.09743	122.507	88.9231	77.8154	66.2551	55.0261	44.4744	35.1666	27.1712	20.7071	15.5472	11.6409	8.66485	6.53407	4.93011	3.75873	2.87666	2.20924	1.69294	0	23.8306	15.0536	81.8747	67.1434	41.0727	25.3294	3.68697	-10.1168	-29.522	-34.1138	0	0	0	0	0	0	0	184.239	117.213	118.17
					5.11826	123.153	90.0795	78.7447	67.1143	55.7197	45.0381	35.5176	27.4909	20.9513	15.736	11.7822	8.774	6.63724	4.98691	3.80256	2.91217	2.23393	1.71253	0	24.1405	15.2334	82.9365	67.9898	41.5932	25.5823	3.73035	-10.236	-29.8807	-34.5279	0	0	0	0	0	0	0	186.561	118.699	119.657
					5.1391	123.798	91.0419	79.6344	67.8357	56.3308	45.5177	35.9378	27.8058	21.2129	15.961	11.9554	8.91605	6.73873	5.07448	3.87253	2.96548	2.27452	1.7282	0	24.3984	15.4055	83.828	68.7354	42.0361	25.885	3.77308	-10.3639	-30.3078	-35.0354	0	0	0	0	0	0	0	188.354	119.847	120.804
					5.15993	124.442	91.7122	80.2878	68.3661	56.8269	45.8108	36.2348	28.0541	21.4074	16.095	12.068	9.00558	6.81638	5.0987	3.88228	2.99011	2.28609	1.73814	0	24.5781	15.5319	84.4834	69.3407	42.3068	26.0988	3.80677	-10.4589	-30.5623	-35.3656	0	0	0	0	0	0	0	189.76	120.746	121.703
					5.18076	125.085	92.3877	80.8796	68.8744	57.14	46.2336	36.5275	28.2534	21.4804	16.2138	12.1742	9.06546	6.85284	5.14201	3.91837	2.99723	2.28572	1.75393	0	24.7591	15.6464	85.1116	69.7228	42.6973	26.3097	3.83382	-10.4946	-30.788	-35.6766	0	0	0	0	0	0	0	191.122	121.618	122.575
					5.2016	125.726	93.1986	81.4963	69.4304	57.5735	46.5233	36.7942	28.461	21.6907	16.3406	12.245	9.1334	6.8953	5.18857	3.94506	3.03569	2.32011	1.76386	0	24.9764	15.7657	85.7986	70.2517	42.9648	26.5018	3.86199	-10.5973	-31.0286	-35.8842	0	0	0	0	0	0	0	192.611	122.571	123.528
					5.22243	126.364	93.917	82.1206	69.938	57.9796	46.8815	37.0278	28.6691	21.8779	16.4747	12.3447	9.21111	6.95409	5.23574	3.97246	3.05279	2.33662	1.7847	0	25.1689	15.8865	86.4259	70.7473	43.2956	26.67	3.89022	-10.6888	-31.2833	-36.1763	0	0	0	0	0	0	0	193.936	123.419	124.376
					5.24326	126.998	94.307	82.4309	70.1795	58.1513	47.002	37.1549	28.7834	21.9641	16.4938	12.413	9.29238	6.99824	5.26651	4.0123	3.07075	2.35942	1.79822	0	25.2734	15.9465	86.7243	70.9568	43.4069	26.7615	3.90573	-10.7309	-31.3196	-36.3764	0	0	0	0	0	0	0	194.548	123.811	124.768
					5.2641	127.629	95.0121	82.9407	70.6151	58.5383	47.2935	37.3359	28.9105	22.0344	16.6034	12.4671	9.28436	7.02889	5.27608	4.0212	3.09577	2.36451	1.79987	0	25.4624	16.0451	87.2626	71.4291	43.6761	26.892	3.92298	-10.7652	-31.5276	-36.5352	0	0	0	0	0	0	0	195.862	124.652	125.609
					5.28493	128.254	95.3614	83.3173	70.8057	58.7341	47.4175	37.4061	28.9947	22.1363	16.6761	12.4816	9.29955	7.05062	5.29937	4.04082	3.10336	2.38066	1.82931	0	25.556	16.118	87.4981	71.6679	43.7906	26.9425	3.93441	-10.815	-31.6658	-36.5777	0	0	0	0	0	0	0	196.449	125.027	125.985
					5.30576	128.874	96.1602	83.9665	71.3327	59.1083	47.7493	37.7186	29.2073	22.2963	16.7744	12.5869	9.37516	7.11397	5.31912	4.05977	3.11423	2.38381	1.81745	0	25.7701	16.2436	88.1494	72.1246	44.0971	27.1676	3.96325	-10.8932	-31.8523	-36.8861	0	0	0	0	0	0	0	197.884	125.946	126.903
					5.3266	129.488	96.6314	84.2984	71.6413	59.3593	47.9907	37.8278	29.2674	22.3429	16.8365	12.641	9.42923	7.12442	5.36205	4.08064	3.11637	2.38442	1.81305	0	25.8963	16.3078	88.5308	72.4309	44.32	27.2463	3.9714	-10.9159	-31.9704	-37.0446	0	0	0	0	0	0	0	198.772	126.514	127.472
					5.34743	130.095	97.1971	84.7559	72.154	59.7038	48.2155	38.0651	29.4576	22.4701	16.9281	12.7104	9.48213	7.14838	5.38428	4.09652	3.13313	2.40787	1.81973	0	26.0479	16.3963	89.1643	72.8512	44.5276	27.4172	3.99722	-10.9781	-32.1443	-37.2481	0	0	0	0	0	0	0	200.031	127.32	128.277
					5.36826	130.695	97.521	85.0652	72.3176	59.9213	48.3794	38.1665	29.5335	22.4997	16.9823	12.7179	9.52547	7.19974	5.40055	4.10573	3.15365	2.40421	1.83825	0	26.1347	16.4561	89.3664	73.1165	44.679	27.4901	4.00752	-10.9926	-32.2472	-37.2702	0	0	0	0	0	0	0	200.741	127.774	128.731
					5.3891	131.287	98.257	85.7152	72.8308	60.349	48.7104	38.4397	29.7767	22.6507	17.0615	12.8159	9.56114	7.24034	5.43599	4.13575	3.17098	2.43108	1.85348	0	26.332	16.5819	90.0007	73.6385	44.9847	27.687	4.04052	-11.0663	-32.3975	-37.5573	0	0	0	0	0	0	0	202.244	128.736	129.693
					5.40993	131.87	98.7949	86.0964	73.1444	60.5116	48.8456	38.4527	29.8035	22.6982	17.1403	12.8802	9.60073	7.26313	5.45414	4.15961	3.18022	2.45031	1.87157	0	26.4762	16.6556	90.3882	73.8368	45.1095	27.6963	4.04415	-11.0895	-32.5472	-37.7455	0	0	0	0	0	0	0	202.824	129.108	130.065
					5.43076	132.443	99.3354	86.5286	73.4731	60.8557	49.1539	38.7541	29.9687	22.8403	17.2086	12.8765	9.64316	7.28941	5.50032	4.17188	3.20273	2.45085	1.86587	0	26.621	16.7392	90.7944	74.2567	45.3942	27.9134	4.06658	-11.1589	-32.6769	-37.7349	0	0	0	0	0	0	0	204.215	129.998	130.955
					5.45161	133.007	99.937	87.0353	73.7689	61.1172	49.2102	38.8408	30.0181	22.9312	17.2689	12.9591	9.67449	7.33621	5.51314	4.18865	3.20429	2.45224	1.86586	0	26.7822	16.8372	91.1599	74.5758	45.4462	27.9759	4.07328	-11.2034	-32.7914	-37.9769	0	0	0	0	0	0	0	204.879	130.423	131.38
					5.47244	133.56	100.34	87.4398	74.132	61.3626	49.4491	38.9886	30.158	22.9853	17.2932	12.9926	9.67334	7.34776	5.5196	4.208	3.21947	2.45166	1.87894	0	26.8903	16.9155	91.6086	74.8753	45.6669	28.0823	4.09226	-11.2298	-32.8376	-38.0749	0	0	0	0	0	0	0	205.989	131.133	132.09
					5.49328	134.102	100.834	87.8595	74.4864	61.502	49.5904	39.1122	30.2345	23.0929	17.3977	13.0512	9.76343	7.37491	5.55873	4.24287	3.23001	2.46919	1.89664	0	27.0226	16.9967	92.0466	75.0453	45.7973	28.1713	4.10264	-11.2824	-33.0359	-38.2468	0	0	0	0	0	0	0	206.618	131.535	132.492
					5.51411	134.631	101.499	88.4055	74.8901	61.8293	49.7775	39.2233	30.3444	23.1283	17.4626	13.1334	9.83751	7.43598	5.62685	4.27232	3.26406	2.50983	1.92828	0	27.2008	17.1023	92.5454	75.4447	45.9702	28.2514	4.11756	-11.2996	-33.1593	-38.4877	0	0	0	0	0	0	0	207.686	132.219	133.176
					5.53494	135.148	101.778	88.6936	75.1155	62.0649	50.0528	39.4009	30.4793	23.2113	17.5318	13.1732	9.89435	7.47038	5.63991	4.30011	3.29236	2.52475	1.94074	0	27.2757	17.158	92.824	75.7323	46.2243	28.3793	4.13585	-11.3402	-33.2906	-38.6042	0	0	0	0	0	0	0	208.494	132.737	133.694
					5.55578	135.652	102.388	89.0548	75.4059	62.1635	50.0239	39.4155	30.4767	23.2489	17.546	13.1818	9.89669	7.47559	5.66425	4.29023	3.31789	2.52953	1.983	0	27.439	17.2279	93.1828	75.8525	46.1977	28.3898	4.13551	-11.3586	-33.3176	-38.6296	0	0	0	0	0	0	0	209.119	133.136	134.094
					5.57661	136.142	102.628	89.206	75.5806	62.3399	50.1349	39.4891	30.491	23.2575	17.5472	13.2142	9.91464	7.49862	5.67204	4.32827	3.37123	2.57332	1.95459	0	27.5033	17.2572	93.3987	76.0677	46.3002	28.4428	4.13744	-11.3628	-33.3199	-38.7244	0	0	0	0	0	0	0	209.7	133.508	134.465
					5.59744	136.617	102.899	89.5135	75.7444	62.4504	50.2159	39.5912	30.6683	23.4045	17.7051	13.3414	10.0915	7.60882	5.77907	4.43248	3.4209	2.60607	1.99864	0	27.5761	17.3167	93.6011	76.2027	46.375	28.5163	4.1615	-11.4346	-33.6196	-39.0973	0	0	0	0	0	0	0	209.598	133.443	134.4
					5.61828	137.077	103.377	89.8715	75.9874	62.5844	50.3653	39.579	30.6484	23.3815	17.6497	13.28	10.04	7.57375	5.74611	4.39571	3.38186	2.5797	1.98363	0	27.7041	17.3859	93.9014	76.3661	46.513	28.5076	4.15881	-11.4234	-33.5145	-38.9173	0	0	0	0	0	0	0	210.682	134.136	135.094
					5.63911	137.521	103.918	90.225	76.2838	62.768	50.405	39.6816	30.6393	23.385	17.6486	13.2793	9.99916	7.55527	5.72014	4.38336	3.36249	2.57168	1.94885	0	27.8491	17.4543	94.2677	76.5902	46.5496	28.5814	4.15757	-11.4251	-33.5125	-38.9151	0	0	0	0	0	0	0	211.597	134.722	135.679
					5.65994	137.948	104.185	90.2556	76.2955	62.875	50.473	39.6927	30.6669	23.4337	17.6784	13.2929	10.0203	7.55469	5.7533	4.38206	3.36884	2.58173	1.98318	0	27.9207	17.4602	94.2821	76.7207	46.6125	28.5895	4.16131	-11.4489	-33.5689	-38.955	0	0	0	0	0	0	0	211.774	134.836	135.793
					5.68078	138.358	104.603	90.6659	76.5464	63.0147	50.6014	39.7641	30.7495	23.4699	17.7403	13.3759	10.1349	7.65067	5.83275	4.46937	3.42932	2.62901	2.02676	0	28.0326	17.5396	94.5922	76.8912	46.731	28.6409	4.17252	-11.4665	-33.6866	-39.1984	0	0	0	0	0	0	0	212.248	135.139	136.096
					5.70161	138.751	104.831	90.909	76.656	63.0771	50.6618	39.8128	30.7688	23.478	17.7499	13.3911	10.1574	7.64855	5.81528	4.45129	3.42613	2.63271	2.01301	0	28.0939	17.5866	94.7276	76.9673	46.7868	28.676	4.17514	-11.4705	-33.7047	-39.2428	0	0	0	0	0	0	0	212.595	135.361	136.318
					5.72244	139.124	105.158	91.1275	76.795	63.1359	50.672	39.8421	30.7879	23.4754	17.773	13.3768	10.1075	7.63641	5.79951	4.44444	3.42353	2.61077	2.01924	0	28.1814	17.6289	94.8994	77.039	46.7962	28.697	4.17773	-11.4692	-33.7486	-39.201	0	0	0	0	0	0	0	213.001	135.621	136.578
					5.74328	139.479	105.313	91.2144	76.941	63.2055	50.6432	39.8585	30.8074	23.5462	17.781	13.41	10.1079	7.64315	5.89833	4.44754	3.43486	2.62151	2.01855	0	28.2229	17.6457	95.0799	77.124	46.7696	28.7089	4.18039	-11.5038	-33.7638	-39.2983	0	0	0	0	0	0	0	213.165	135.726	136.683
					5.76411	139.814	105.648	91.3933	77.0931	63.2769	50.6833	39.8009	30.741	23.4477	17.7296	13.3277	10.0025	7.57397	5.7412	4.3718	3.35242	2.59404	1.98205	0	28.3128	17.6803	95.2678	77.2111	46.8066	28.6674	4.17137	-11.4557	-33.6662	-39.0571	0	0	0	0	0	0	0	213.938	136.221	137.178
					5.78494	140.128	105.684	91.4394	76.9502	63.212	50.6837	39.7764	30.7271	23.4397	17.6761	13.3009	9.97894	7.55435	5.70428	4.36855	3.36041	2.58482	1.96197	0	28.3222	17.6892	95.0912	77.1319	46.807	28.6498	4.16949	-11.4518	-33.5646	-38.9786	0	0	0	0	0	0	0	213.866	136.174	137.131
					5.80578	140.421	106.055	91.6864	77.2995	63.325	50.7479	39.79	30.7835	23.4599	17.7208	13.3502	10.0082	7.5951	5.75208	4.38747	3.38873	2.59469	1.97538	0	28.4219	17.737	95.5228	77.2698	46.8663	28.6595	4.17713	-11.4617	-33.6495	-39.123	0	0	0	0	0	0	0	214.42	136.529	137.486
					5.82661	140.693	106.046	91.6731	77.1792	63.3908	50.8138	39.8408	30.7943	23.4911	17.724	13.3301	10.01	7.60248	5.75469	4.39299	3.38082	2.59811	1.98974	0	28.4193	17.7344	95.3742	77.3501	46.9271	28.6961	4.17861	-11.4769	-33.6557	-39.064	0	0	0	0	0	0	0	214.483	136.569	137.527
					5.84744	140.942	106.276	91.8842	77.3002	63.4299	50.8451	39.9397	30.8132	23.4988	17.7433	13.3667	10.0204	7.60438	5.72481	4.39473	3.38662	2.61181	2.01229	0	28.481	17.7753	95.5237	77.3978	46.9561	28.7674	4.18116	-11.4807	-33.6922	-39.1714	0	0	0	0	0	0	0	214.738	136.733	137.69
					5.86828	141.167	106.327	91.8967	77.307	63.438	50.8051	39.856	30.7505	23.4515	17.712	13.332	9.98874	7.58256	5.73812	4.37878	3.3761	2.57303	1.98054	0	28.4948	17.7777	95.5321	77.4077	46.9192	28.7071	4.17265	-11.4576	-33.6327	-39.0698	0	0	0	0	0	0	0	214.851	136.805	137.762
					5.88911	141.369	106.294	91.8617	77.3963	63.5033	50.9001	39.9524	30.8453	23.5215	17.7689	13.3914	10.0953	7.63811	5.79157	4.43946	3.41712	2.62357	2.01975	0	28.4858	17.7709	95.6425	77.4873	47.0068	28.7765	4.18552	-11.4917	-33.7409	-39.2437	0	0	0	0	0	0	0	214.879	136.823	137.78
					5.90994	141.547	106.455	91.9873	77.4479	63.5864	50.9295	39.9435	30.8497	23.525	17.722	13.3682	10.0568	7.62703	5.79575	4.44076	3.41495	2.63135	2.02637	0	28.529	17.7952	95.7062	77.5888	47.034	28.7701	4.18612	-11.4935	-33.6517	-39.1759	0	0	0	0	0	0	0	215.288	137.085	138.042
					5.93078	141.7	106.486	92.0779	77.5208	63.6068	50.9497	40.0086	30.9017	23.5812	17.8004	13.4035	10.0602	7.67541	5.79676	4.40617	3.39956	2.62384	1.99294	0	28.5373	17.8127	95.7963	77.6136	47.0526	28.817	4.19318	-11.5209	-33.8006	-39.2792	0	0	0	0	0	0	0	215.222	137.042	137.999
					5.95161	141.827	106.692	92.2312	77.6623	63.7101	50.9893	40.0162	30.8779	23.5858	17.7956	13.3787	10.085	7.65061	5.78137	4.4495	3.40423	2.61779	2.01551	0	28.5925	17.8424	95.9712	77.7397	47.0893	28.8224	4.18995	-11.5232	-33.7916	-39.2066	0	0	0	0	0	0	0	215.726	137.365	138.322
					5.97244	141.927	106.832	92.342	77.7647	63.7461	51.0396	40.0153	30.9067	23.547	17.8087	13.4447	10.094	7.66061	5.79428	4.43485	3.42302	2.62446	2.00305	0	28.63	17.8638	96.0977	77.7836	47.1357	28.8218	4.19385	-11.5042	-33.8163	-39.3999	0	0	0	0	0	0	0	215.806	137.416	138.373
					5.99328	142.001	107.39	92.6834	78.0027	63.9335	51.2463	40.2469	31.0732	23.7078	17.8648	13.4988	10.1188	7.68616	5.81693	4.46307	3.43296	2.63918	2.02135	0	28.7796	17.9299	96.3919	78.0123	47.3265	28.9886	4.21645	-11.5828	-33.9229	-39.5585	0	0	0	0	0	0	0	216.581	137.912	138.869
					6.01411	142.046	107.479	92.8716	78.1225	64.0359	51.2716	40.2489	31.1033	23.7198	17.9167	13.5109	10.1465	7.68134	5.81916	4.4557	3.42804	2.63682	2.02069	0	28.8033	17.9663	96.5399	78.1372	47.3499	28.9901	4.22053	-11.5886	-34.0216	-39.5939	0	0	0	0	0	0	0	216.803	138.054	139.011
					6.03494	142.075	107.55	92.9827	78.1383	64.0754	51.247	40.2372	31.0873	23.734	17.9159	13.5012	10.123	7.67143	5.81461	4.45516	3.41563	2.62918	2.00498	0	28.8224	17.9878	96.5594	78.1854	47.3272	28.9816	4.21836	-11.5956	-34.02	-39.5655	0	0	0	0	0	0	0	216.901	138.117	139.074
					6.05578	142.102	107.612	93.0135	78.2223	64.1628	51.3776	40.3802	31.1734	23.8241	18.0024	13.5609	10.2102	7.73379	5.86092	4.47709	3.44507	2.65509	2.03312	0	28.8391	17.9937	96.6631	78.2921	47.4478	29.0847	4.23004	-11.6396	-34.1842	-39.7405	0	0	0	0	0	0	0	216.986	138.171	139.129
					6.07661	142.129	106.187	91.8784	77.3545	63.5526	50.9569	40.1206	31.0118	23.6731	17.8227	13.4747	10.132	7.6854	5.8043	4.42562	3.4098	2.60155	1.99144	0	28.4572	17.7742	95.5909	77.5475	47.0593	28.8976	4.20812	-11.5658	-33.8429	-39.488	0	0	0	0	0	0	0	214.638	136.668	137.626
					6.09745	142.155	106.701	92.4277	77.9079	63.9949	51.3787	40.4048	31.2365	23.8832	18.0516	13.6047	10.2344	7.76723	5.86294	4.46317	3.42885	2.62195	2.00368	0	28.595	17.8804	96.2747	78.0872	47.4489	29.1024	4.23861	-11.6685	-34.2777	-39.8689	0	0	0	0	0	0	0	215.812	137.42	138.377
					6.11829	142.181	106.642	92.4301	77.902	64.012	51.3695	40.4158	31.29	23.9183	18.0452	13.6257	10.2422	7.76654	5.86594	4.46919	3.42889	2.59824	2.00462	0	28.5792	17.8809	96.2674	78.1081	47.4403	29.1103	4.24587	-11.6856	-34.2654	-39.9304	0	0	0	0	0	0	0	215.751	137.381	138.338
					6.13912	142.206	106.576	92.4371	77.9409	64.0686	51.4632	40.5267	31.3854	23.991	18.1515	13.7201	10.3041	7.80874	5.88059	4.50749	3.44927	2.64425	2.02962	0	28.5615	17.8822	96.3155	78.1771	47.5269	29.1902	4.25881	-11.7212	-34.4674	-40.2069	0	0	0	0	0	0	0	215.517	137.231	138.188
					6.15995	142.231	106.887	92.5976	78.1714	64.2873	51.606	40.6119	31.463	24.093	18.2432	13.7629	10.286	7.83405	5.92149	4.5245	3.48744	2.67982	2.03671	0	28.6448	17.9133	96.6004	78.444	47.6588	29.2515	4.26934	-11.771	-34.6415	-40.3325	0	0	0	0	0	0	0	216.037	137.564	138.521
					6.18079	142.255	106.992	92.7071	78.1617	64.381	51.7182	40.7514	31.5906	24.1791	18.3206	13.8457	10.4114	7.88346	5.96379	4.54474	3.49632	2.67682	2.046	0	28.6728	17.9345	96.5883	78.5583	47.7624	29.352	4.28666	-11.8131	-34.7885	-40.5752	0	0	0	0	0	0	0	215.978	137.526	138.483
					6.20162	142.279	107.005	92.8022	78.3291	64.4706	51.7451	40.841	31.6218	24.2394	18.3719	13.8724	10.4449	7.9209	5.98039	4.58883	3.50967	2.68288	2.03072	0	28.6764	17.9529	96.7952	78.6676	47.7872	29.4165	4.29089	-11.8425	-34.8859	-40.6534	0	0	0	0	0	0	0	216.205	137.671	138.628
					6.22245	142.302	107.372	93.0049	78.4577	64.5313	51.8826	40.928	31.7514	24.3561	18.4466	13.9434	10.489	7.97389	6.02052	4.59148	3.52729	2.70465	2.06287	0	28.7747	17.9921	96.9542	78.7417	47.9142	29.4792	4.30847	-11.8995	-35.0277	-40.8615	0	0	0	0	0	0	0	216.376	137.781	138.738
					6.24329	142.324	107.21	92.9011	78.3764	64.4421	51.8303	40.8794	31.7003	24.3489	18.4711	13.9237	10.4779	7.95401	6.02347	4.58768	3.52553	2.68111	2.06357	0	28.7312	17.972	96.8536	78.6329	47.8659	29.4442	4.30154	-11.896	-35.0743	-40.8036	0	0	0	0	0	0	0	216.027	137.558	138.515
					6.26412	142.346	107.193	92.835	78.3275	64.6063	51.9942	41.0708	31.8455	24.4098	18.5165	13.9945	10.5185	7.97726	6.0238	4.58801	3.52691	2.69746	2.04881	0	28.7268	17.9592	96.7932	78.8332	48.0172	29.5821	4.32124	-11.9257	-35.1603	-41.0111	0	0	0	0	0	0	0	216.136	137.627	138.584
					6.28495	142.367	106.952	92.7176	78.3538	64.5527	51.9762	41.0182	31.8099	24.4936	18.5714	14.051	10.575	8.02161	6.0488	4.62669	3.5512	2.71545	2.07733	0	28.6622	17.9365	96.8257	78.7679	48.0006	29.5442	4.31641	-11.9667	-35.2646	-41.1768	0	0	0	0	0	0	0	215.646	137.313	138.27
					6.30579	142.388	107.405	93.1294	78.5738	64.7141	52.0541	41.1251	31.9885	24.5669	18.6444	14.104	10.6088	8.03443	6.07075	4.62492	3.55265	2.722	2.08582	0	28.7836	18.0162	97.0976	78.9648	48.0726	29.6212	4.34065	-12.0025	-35.4034	-41.3321	0	0	0	0	0	0	0	216.159	137.642	138.599
					6.32662	142.408	107.405	93.0309	78.6176	64.7336	52.1245	41.2079	32.0456	24.6135	18.6505	14.084	10.6135	8.05796	6.08628	4.66059	3.56139	2.71719	2.07394	0	28.7835	17.9971	97.1517	78.9885	48.1376	29.6808	4.3484	-12.0253	-35.4149	-41.2734	0	0	0	0	0	0	0	216.374	137.78	138.737
					6.34745	142.427	107.287	93.0178	78.605	64.7712	52.2169	41.3146	32.1273	24.6856	18.7429	14.1836	10.6661	8.09201	6.13152	4.66102	3.53055	2.73006	2.09636	0	28.752	17.9946	97.1361	79.0345	48.2229	29.7577	4.35949	-12.0605	-35.5903	-41.5653	0	0	0	0	0	0	0	216.041	137.566	138.524
					6.36829	142.446	107.282	92.9877	78.5653	64.8099	52.3036	41.3408	32.1772	24.7465	18.7705	14.2167	10.7096	8.10247	6.12492	4.67817	3.57566	2.74097	2.08692	0	28.7506	17.9887	97.0871	79.0817	48.303	29.7766	4.36626	-12.0902	-35.6427	-41.6622	0	0	0	0	0	0	0	215.959	137.514	138.471
					6.38912	142.464	107.277	92.9737	78.5736	64.7922	52.2657	41.3458	32.1866	24.7716	18.8314	14.2544	10.7178	8.13163	6.13309	4.65573	3.57715	2.73356	2.08169	0	28.7493	17.986	97.0974	79.0601	48.268	29.7802	4.36753	-12.1025	-35.7584	-41.7729	0	0	0	0	0	0	0	215.675	137.332	138.289
					6.40995	142.482	107.439	93.115	78.7344	64.9996	52.4324	41.4876	32.3383	24.8727	18.9036	14.3258	10.772	8.17691	6.16625	4.69022	3.58884	2.79704	2.09413	0	28.7928	18.0134	97.2961	79.3132	48.4219	29.8823	4.38811	-12.1519	-35.8955	-41.982	0	0	0	0	0	0	0	216.078	137.59	138.547
					6.43079	142.499	107.441	93.157	78.6779	64.9308	52.4777	41.5715	32.3758	24.9651	18.9677	14.3508	10.815	8.18597	6.16758	4.70483	3.587	2.75146	2.09986	0	28.7933	18.0215	97.2263	79.2293	48.4638	29.9427	4.3932	-12.1971	-36.0173	-42.0552	0	0	0	0	0	0	0	215.801	137.412	138.37
					6.45162	142.515	107.317	93.1412	78.7636	65.0155	52.5029	41.6177	32.4479	24.9838	18.9806	14.3893	10.8118	8.20835	6.18767	4.71326	3.62529	2.73849	2.09533	0	28.76	18.0184	97.3321	79.3325	48.4871	29.976	4.40299	-12.2062	-36.0418	-42.1682	0	0	0	0	0	0	0	215.893	137.472	138.429
					6.47245	142.531	107.39	93.1506	78.8121	65.0979	52.5608	41.6733	32.5153	25.0769	19.0877	14.4532	10.868	8.23827	6.23087	4.73385	3.62916	2.77182	2.1098	0	28.7795	18.0203	97.3921	79.4331	48.5406	30.016	4.41213	-12.2517	-36.245	-42.3555	0	0	0	0	0	0	0	215.741	137.375	138.332
					6.49329	142.546	107.313	93.1461	78.7882	65.025	52.5589	41.6628	32.5694	25.093	19.0999	14.479	10.8927	8.26093	6.23324	4.72745	3.62389	2.77406	2.10292	0	28.7589	18.0194	97.3625	79.3441	48.5388	30.0084	4.41947	-12.2596	-36.2682	-42.4311	0	0	0	0	0	0	0	215.493	137.215	138.173
					6.51412	142.56	107.367	93.1474	78.838	65.217	52.677	41.8341	32.6496	25.1588	19.1599	14.4752	10.8804	8.23322	6.22302	4.72551	3.61318	2.76317	2.08381	0	28.7733	18.0197	97.424	79.5784	48.6478	30.1318	4.43035	-12.2917	-36.3822	-42.4199	0	0	0	0	0	0	0	215.912	137.484	138.441
					6.53495	142.574	107.314	93.202	78.9175	65.2775	52.7935	41.9573	32.7858	25.3024	19.2915	14.6293	11.0226	8.35968	6.32383	4.80573	3.67483	2.8116	2.14291	0	28.7591	18.0302	97.5224	79.6523	48.7554	30.2206	4.44884	-12.3619	-36.6321	-42.8713	0	0	0	0	0	0	0	215.523	137.235	138.192
					6.55579	142.587	107.464	93.3388	79.0565	65.3029	52.8895	42.0389	32.8826	25.3834	19.3447	14.6796	11.0694	8.37831	6.33513	4.81746	3.70604	2.82171	2.14359	0	28.7994	18.0567	97.6941	79.6832	48.844	30.2794	4.46197	-12.4014	-36.7331	-43.0188	0	0	0	0	0	0	0	215.665	137.326	138.283
					6.57662	142.6	107.585	93.528	79.218	65.596	53.0986	42.194	33.0089	25.511	19.4381	14.7641	11.168	8.46597	6.39664	4.86484	3.73037	2.85246	2.17264	0	28.8319	18.0933	97.8936	80.0408	49.0372	30.3911	4.47911	-12.4638	-36.9104	-43.2664	0	0	0	0	0	0	0	216.126	137.621	138.578
					6.59745	142.611	107.682	93.5118	79.2315	65.5447	53.1182	42.2852	33.17	25.6241	19.6085	14.8564	11.245	8.5139	6.44871	4.90573	3.75495	2.86059	2.17756	0	28.8579	18.0901	97.9103	79.9784	49.0553	30.4568	4.50097	-12.519	-37.2339	-43.537	0	0	0	0	0	0	0	215.56	137.258	138.216
					6.61829	142.623	107.784	93.6193	79.3358	65.6515	53.2455	42.4112	33.1914	25.6967	19.6274	14.9291	11.2972	8.53992	6.47945	4.92771	3.73528	2.8816	2.19523	0	28.8853	18.1109	98.0392	80.1086	49.1729	30.5475	4.50388	-12.5545	-37.2699	-43.7501	0	0	0	0	0	0	0	215.794	137.408	138.365
					6.63912	142.633	107.868	93.7137	79.5315	65.8847	53.4243	42.5412	33.3465	25.8154	19.7058	14.9779	11.3378	8.57999	6.48902	4.95512	3.7902	2.87905	2.19443	0	28.9077	18.1292	98.2811	80.3932	49.3379	30.6412	4.52492	-12.6125	-37.4188	-43.893	0	0	0	0	0	0	0	216.291	137.726	138.684
					6.65995	142.643	107.85	93.7893	79.6476	65.8228	53.5052	42.6311	33.4284	25.8723	19.7525	15.0336	11.3695	8.62888	6.46358	4.97147	3.80571	2.89711	2.1994	0	28.9029	18.1438	98.4245	80.3177	49.4127	30.7059	4.53603	-12.6403	-37.5074	-44.0561	0	0	0	0	0	0	0	216.24	137.693	138.651
					6.68079	142.652	107.959	93.9361	79.7579	66.1269	53.7122	42.806	33.5655	26.059	19.9373	15.1683	11.5598	8.71718	6.6255	5.06062	3.88511	2.94154	2.26047	0	28.9322	18.1722	98.5608	80.6887	49.6039	30.8318	4.55463	-12.7315	-37.8583	-44.4509	0	0	0	0	0	0	0	216.304	137.734	138.692
					6.70162	142.661	108.19	94.0928	79.8381	66.2476	53.8335	42.9289	33.7262	26.1512	20.0047	15.2416	11.6181	8.76419	6.66289	5.08607	3.89259	2.97521	2.26681	0	28.9941	18.2025	98.6599	80.836	49.7158	30.9204	4.57644	-12.7766	-37.9863	-44.6659	0	0	0	0	0	0	0	216.476	137.845	138.802
					6.72247	142.669	108.4	94.2607	79.9483	66.3577	53.8965	43.0186	33.7887	26.2174	20.0312	15.2359	11.5568	8.75038	6.62906	5.0568	3.86658	2.94935	2.23987	0	29.0503	18.235	98.7961	80.9703	49.774	30.985	4.58493	-12.8089	-38.0367	-44.6491	0	0	0	0	0	0	0	216.901	138.117	139.074
					6.7433	142.676	108.475	94.2802	80.0198	66.4306	54.042	43.0691	33.8471	26.2492	20.0898	15.2672	11.5764	8.76403	6.61895	5.03688	3.84855	2.91182	2.23612	0	29.0703	18.2388	98.8845	81.0593	49.9085	31.0214	4.59284	-12.8244	-38.1479	-44.7408	0	0	0	0	0	0	0	217.062	138.22	139.177
					6.76413	142.682	108.739	94.5471	80.2195	66.6643	54.2124	43.236	33.971	26.3518	20.1198	15.3245	11.5642	8.75976	6.54686	5.02689	3.83197	2.92599	2.21498	0	29.1412	18.2904	99.1313	81.3445	50.0658	31.1416	4.60966	-12.8745	-38.2048	-44.9089	0	0	0	0	0	0	0	217.736	138.651	139.608
					6.78497	142.688	108.661	94.5177	80.2668	66.6986	54.2466	43.3347	34.0574	26.408	20.1906	15.3104	11.5614	8.75461	6.60815	5.02015	3.82689	2.91709	2.21185	0	29.1201	18.2847	99.1897	81.3863	50.0974	31.2127	4.62138	-12.902	-38.3393	-44.8675	0	0	0	0	0	0	0	217.804	138.694	139.652
					6.8058	142.693	108.756	94.6242	80.4297	66.8633	54.4441	43.4951	34.2199	26.5325	20.3292	15.4692	11.6525	8.85551	6.68661	5.05613	3.86344	2.95326	2.23313	0	29.1456	18.3053	99.391	81.5872	50.2798	31.3282	4.64343	-12.9628	-38.6025	-45.3328	0	0	0	0	0	0	0	217.783	138.681	139.638
					6.82663	142.698	109.262	95.0271	80.7166	67.0911	54.6591	43.6921	34.3636	26.6683	20.4143	15.4902	11.7686	8.87596	6.70192	5.07231	3.8815	2.94824	2.24052	0	29.2813	18.3833	99.7455	81.8652	50.4783	31.4701	4.66294	-13.0292	-38.7641	-45.3944	0	0	0	0	0	0	0	218.699	139.267	140.225
					6.84747	142.702	109.177	95.2139	80.9743	67.3501	54.8376	43.8547	34.4925	26.8167	20.521	15.6074	11.7745	8.941	6.73938	5.12275	3.91503	2.98874	2.26292	0	29.2585	18.4194	100.064	82.1812	50.6431	31.5872	4.68042	-13.1017	-38.9667	-45.7377	0	0	0	0	0	0	0	219.028	139.478	140.435
					6.8683	142.705	109.538	95.3428	80.9897	67.3797	54.8701	43.9132	34.5951	26.8932	20.6254	15.7075	11.841	8.98142	6.75641	5.12354	3.91012	2.98339	2.25665	0	29.3552	18.4444	100.083	82.2173	50.6732	31.6294	4.69435	-13.1391	-39.165	-46.031	0	0	0	0	0	0	0	218.762	139.308	140.265
					6.88913	142.707	109.499	95.4128	81.2093	67.5543	54.9958	44.0335	34.6486	27.0407	20.6978	15.7806	11.9239	9.04018	6.80733	5.14953	3.93066	2.99319	2.26918	0	29.3448	18.4579	100.354	82.4305	50.7893	31.716	4.70161	-13.2111	-39.3024	-46.2453	0	0	0	0	0	0	0	219.036	139.483	140.44
					6.90997	142.709	109.856	95.7367	81.4366	67.8089	55.2942	44.2747	34.9469	27.1662	20.8361	15.8679	11.9591	9.06462	6.81768	5.17468	3.93965	3.0015	2.27249	0	29.4405	18.5206	100.635	82.741	51.0649	31.8897	4.74209	-13.2724	-39.565	-46.5013	0	0	0	0	0	0	0	219.695	139.905	140.862
					6.9308	142.71	110.101	95.9203	81.563	67.9484	55.407	44.3685	35.0484	27.2868	20.9186	15.9448	12.0349	9.09621	6.87099	5.17814	3.96786	3.01974	2.29761	0	29.5061	18.5561	100.791	82.9113	51.169	31.9573	4.75585	-13.3313	-39.7217	-46.7264	0	0	0	0	0	0	0	219.868	140.015	140.973
					6.95163	142.71	110.138	95.9606	81.6697	68.0398	55.5105	44.5461	35.152	27.3587	21.0162	16.0058	12.1032	9.15149	6.90094	5.23632	3.97512	3.0251	2.29509	0	29.5159	18.5639	100.923	83.0229	51.2646	32.0853	4.76992	-13.3665	-39.907	-46.9053	0	0	0	0	0	0	0	219.967	140.079	141.036
					6.97247	142.702	110.457	96.3045	82.0664	68.2679	55.7755	44.7196	35.3031	27.5227	21.1239	16.0831	12.1613	9.21121	6.95609	5.26188	4.01499	3.03861	2.315	0	29.6015	18.6304	101.414	83.3012	51.5094	32.2102	4.79041	-13.4466	-40.1116	-47.1317	0	0	0	0	0	0	0	220.767	140.591	141.548
					6.9933	142.681	110.463	96.304	81.9922	68.3188	55.819	44.8001	35.4609	27.6156	21.185	16.1535	12.2134	9.25277	6.96809	5.31855	4.01972	3.05721	2.30597	0	29.6031	18.6303	101.322	83.3633	51.5495	32.2682	4.81183	-13.492	-40.2275	-47.3383	0	0	0	0	0	0	0	220.49	140.414	141.371
					7.01413	142.649	110.744	96.5263	82.2695	68.621	56.0201	45.0025	35.5429	27.7303	21.3139	16.2544	12.2853	9.30569	7.01392	5.31999	4.04491	3.07257	2.33064	0	29.6785	18.6733	101.665	83.7321	51.7353	32.414	4.82296	-13.548	-40.4723	-47.6339	0	0	0	0	0	0	0	221.066	140.783	141.74
					7.03497	142.606	110.985	96.7941	82.3842	68.6693	56.1356	45.1074	35.6767	27.7915	21.3735	16.323	12.3221	9.34167	7.02471	5.31772	4.05313	3.02623	2.32188	0	29.743	18.7251	101.806	83.791	51.8419	32.4895	4.84112	-13.5779	-40.5854	-47.835	0	0	0	0	0	0	0	221.24	140.893	141.851
					7.0558	142.551	111.294	96.9583	82.7042	68.8715	56.3081	45.293	35.8165	27.9572	21.4849	16.3995	12.4107	9.3917	7.08403	5.36863	4.09861	3.0962	2.3451	0	29.8257	18.7569	102.202	84.0376	52.0012	32.6232	4.86008	-13.6589	-40.7971	-48.0591	0	0	0	0	0	0	0	221.791	141.247	142.204
					7.07663	142.485	110.138	96.0909	81.8113	68.2926	55.8602	44.9417	35.569	27.7603	21.3382	16.2636	12.2981	9.32304	7.01946	5.31432	4.03356	3.04754	2.30875	0	29.5159	18.5891	101.098	83.3313	51.5876	32.3702	4.8265	-13.5627	-40.5185	-47.6607	0	0	0	0	0	0	0	219.577	139.829	140.787
					7.09747	142.408	110.628	96.4905	82.1892	68.4838	56.0278	45.077	35.7315	27.9093	21.47	16.3592	12.3847	9.37095	7.05692	5.30388	4.03771	3.05725	2.30448	0	29.6473	18.6664	101.565	83.5646	51.7424	32.4676	4.84855	-13.6355	-40.7687	-47.941	0	0	0	0	0	0	0	220.157	140.201	141.158
					7.1183	142.321	110.801	96.483	82.2883	68.6881	56.212	45.2368	35.809	28.0196	21.5662	16.4496	12.4368	9.41056	7.06195	5.34339	4.05991	3.04052	2.31036	0	29.6937	18.6649	101.688	83.8139	51.9124	32.5827	4.85907	-13.6894	-40.9514	-48.2059	0	0	0	0	0	0	0	220.368	140.335	141.293
					7.13913	142.224	111.311	97.0328	82.7315	69.061	56.5702	45.5952	36.1205	28.2607	21.7338	16.5773	12.527	9.47298	7.12065	5.39174	4.08778	3.08923	2.33994	0	29.8304	18.7713	102.235	84.269	52.2432	32.8409	4.90133	-13.8072	-41.2697	-48.5801	0	0	0	0	0	0	0	221.435	141.018	141.975
					7.15997	142.116	111.398	97.1817	82.8934	69.2252	56.7167	45.7254	36.2293	28.3428	21.8087	16.6445	12.5764	9.53701	7.16192	5.41207	4.10306	3.10201	2.33959	0	29.8535	18.8001	102.436	84.4692	52.3785	32.9346	4.9161	-13.8473	-41.4119	-48.777	0	0	0	0	0	0	0	221.751	141.221	142.178
					7.1808	141.998	111.393	97.2399	82.9055	69.2835	56.7703	45.7755	36.3476	28.4552	21.9129	16.6992	12.6564	9.56289	7.17331	5.42333	4.10435	3.11046	2.34145	0	29.8524	18.8114	102.45	84.5404	52.428	32.9707	4.93215	-13.9022	-41.6098	-48.9375	0	0	0	0	0	0	0	221.536	141.083	142.04
					7.20163	141.871	111.557	97.379	83.0564	69.4686	56.9199	45.9534	36.4826	28.5465	22.0037	16.8166	12.6894	9.61068	7.21947	5.44893	4.13025	3.13714	2.3757	0	29.8962	18.8383	102.637	84.7663	52.5662	33.0989	4.95047	-13.9468	-41.7822	-49.2813	0	0	0	0	0	0	0	221.743	141.216	142.173
					7.22247	141.734	111.708	97.5148	83.2171	69.6282	57.1121	46.0783	36.598	28.7018	22.1353	16.9152	12.7545	9.6592	7.2601	5.44326	4.13344	3.12514	2.35848	0	29.9369	18.8645	102.835	84.961	52.7437	33.1888	4.96613	-14.0227	-42.0321	-49.5702	0	0	0	0	0	0	0	221.872	141.298	142.255
					7.2433	141.588	111.82	97.6412	83.3635	69.7866	57.2825	46.275	36.7859	28.8227	22.2719	17.0037	12.812	9.6955	7.28694	5.49392	4.15112	3.14551	2.35353	0	29.9669	18.889	103.016	85.1543	52.9011	33.3305	4.99162	-14.0817	-42.2914	-49.8297	0	0	0	0	0	0	0	222.047	141.41	142.367
					7.26413	141.432	111.99	97.7728	83.5765	70.0125	57.4774	46.4496	36.9331	28.9405	22.3351	17.0947	12.8876	9.77128	7.32731	5.51882	4.18767	3.14868	2.36367	0	30.0123	18.9144	103.28	85.43	53.0811	33.4563	5.0116	-14.1393	-42.4115	-50.0963	0	0	0	0	0	0	0	222.538	141.725	142.682
					7.28497	141.269	108.015	94.3028	80.4622	67.1568	55.0729	44.4604	35.2907	27.6424	21.2539	16.2342	12.2259	9.27069	6.95958	5.25544	3.96964	2.99499	2.25144	0	28.9472	18.2432	99.4312	81.9454	50.8605	32.0235	4.78873	-13.5051	-40.3584	-47.5747	0	0	0	0	0	0	0	214.801	136.773	137.73
					7.3058	141.096	108.752	94.9678	80.9099	67.6503	55.533	44.6989	35.4485	27.7215	21.3848	16.3116	12.2821	9.29939	6.96756	5.25385	3.98957	3.0031	2.26005	0	29.1446	18.3718	99.9844	82.5476	51.2854	32.1953	4.81015	-13.5437	-40.607	-47.8015	0	0	0	0	0	0	0	216.387	137.788	138.745
					7.32663	140.916	108.903	95.1205	81.231	67.9809	55.8148	45.0365	35.7522	27.9947	21.5524	16.4521	12.3867	9.39919	7.05403	5.30487	4.01978	3.06213	2.29244	0	29.1851	18.4013	100.381	82.951	51.5456	32.4385	4.85136	-13.6772	-40.9252	-48.2134	0	0	0	0	0	0	0	216.938	138.141	139.098
					7.34747	140.727	109.282	95.5873	81.6696	68.3091	56.1964	45.3592	36.0521	28.2497	21.779	16.6241	12.5243	9.48608	7.10371	5.36043	4.06678	3.07306	2.30724	0	29.2866	18.4917	100.923	83.3515	51.898	32.6709	4.89205	-13.8018	-41.3555	-48.7172	0	0	0	0	0	0	0	217.64	138.589	139.547
					7.36831	140.53	109.584	95.845	81.8647	68.5179	56.2868	45.4983	36.2177	28.378	21.8895	16.7086	12.5742	9.53208	7.12834	5.36575	4.06421	3.08056	2.29994	0	29.3676	18.5415	101.164	83.6062	51.9815	32.771	4.91453	-13.8645	-41.5653	-48.9649	0	0	0	0	0	0	0	217.952	138.789	139.747
					7.38914	140.326	109.378	95.7586	81.9896	68.6755	56.5233	45.7434	36.3711	28.5471	22.0246	16.8433	12.704	9.63359	7.2059	5.42468	4.09766	3.09944	2.28887	0	29.3122	18.5248	101.319	83.7985	52.1999	32.9476	4.93534	-13.9471	-41.8218	-49.3597	0	0	0	0	0	0	0	217.908	138.761	139.719
					7.40998	140.114	109.553	95.96	82.0482	68.8028	56.7374	45.9166	36.5469	28.6977	22.1858	16.9408	12.793	9.68452	7.24912	5.43364	4.13102	3.11285	2.34036	0	29.3592	18.5638	101.391	83.9538	52.3976	33.0723	4.95919	-14.0207	-42.128	-49.6454	0	0	0	0	0	0	0	217.903	138.758	139.715
					7.43081	139.895	109.617	95.8991	82.2142	69.0312	56.7956	46.1156	36.7517	28.8831	22.3239	17.0614	12.8587	9.73134	7.29492	5.49054	4.16214	3.14011	2.34881	0	29.3764	18.552	101.596	84.2325	52.4514	33.2157	4.98698	-14.1112	-42.3901	-49.9988	0	0	0	0	0	0	0	217.911	138.763	139.72
					7.45164	139.67	109.379	95.8373	82.097	68.9938	56.9042	46.1624	36.8599	28.9527	22.3724	17.1173	12.9034	9.78193	7.32846	5.50886	4.19518	3.15304	2.34232	0	29.3127	18.54	101.451	84.1869	52.5517	33.2494	5.00166	-14.1452	-42.4822	-50.1625	0	0	0	0	0	0	0	217.504	138.502	139.46
					7.47248	139.437	109.388	95.8561	82.2121	69.0878	56.9949	46.2933	36.935	29.064	22.4796	17.2124	12.9867	9.84788	7.3723	5.53318	4.18564	3.16609	2.3684	0	29.315	18.5436	101.594	84.3016	52.6355	33.3437	5.01186	-14.1996	-42.6859	-50.4413	0	0	0	0	0	0	0	217.418	138.448	139.405
					7.49331	139.198	109.404	96.0089	82.3155	69.2843	57.2692	46.4704	37.1755	29.264	22.6722	17.3504	13.1481	9.94722	7.47119	5.625	4.2428	3.20032	2.39803	0	29.3194	18.5732	101.721	84.5414	52.8888	33.4712	5.0445	-14.2973	-43.0516	-50.8457	0	0	0	0	0	0	0	217.365	138.414	139.371
					7.51414	138.953	109.278	95.7666	82.2069	69.346	57.3597	46.6467	37.3131	29.3637	22.7601	17.4705	13.2765	10.0299	7.5358	5.67325	4.28726	3.22977	2.43991	0	29.2856	18.5263	101.587	84.6167	52.9724	33.5983	5.06316	-14.346	-43.2185	-51.1977	0	0	0	0	0	0	0	216.887	138.108	139.065
					7.53498	138.702	109.202	95.8209	82.286	69.3299	57.3716	46.6945	37.3614	29.4881	22.8382	17.5197	13.3281	10.0561	7.55824	5.71322	4.31424	3.24451	2.44336	0	29.2651	18.5368	101.685	84.597	52.9834	33.6327	5.06972	-14.4068	-43.3667	-51.342	0	0	0	0	0	0	0	216.654	137.959	138.916
					7.55581	138.445	108.948	95.5626	82.2913	69.3398	57.4247	46.8493	37.4459	29.6375	23.012	17.6744	13.4895	10.1647	7.66368	5.79303	4.37677	3.28229	2.47833	0	29.197	18.4869	101.691	84.6091	53.0324	33.7441	5.08118	-14.4798	-43.6968	-51.7952	0	0	0	0	0	0	0	215.87	137.457	138.414
					7.57664	138.183	109.003	95.7662	82.4463	69.4932	57.6578	46.9728	37.7121	29.7966	23.1233	17.7404	13.5713	10.2412	7.729	5.83626	4.41299	3.31146	2.49841	0	29.2119	18.5263	101.883	84.7963	53.2476	33.8331	5.11731	-14.5575	-43.9081	-51.9887	0	0	0	0	0	0	0	216.161	137.643	138.6
					7.59748	137.915	108.96	95.8907	82.4463	69.6882	57.7367	47.1081	37.8256	29.8767	23.2028	17.8356	13.7366	10.2682	7.73989	5.83445	4.41197	3.30182	2.49645	0	29.2004	18.5503	101.883	85.0342	53.3206	33.9306	5.1327	-14.5967	-44.059	-52.2675	0	0	0	0	0	0	0	216.129	137.622	138.58
					7.61831	137.642	108.962	95.7965	82.3791	69.6558	57.7824	47.1597	37.8276	29.9504	23.2558	17.8809	13.6182	10.2887	7.74022	5.82288	4.39932	3.30691	2.49051	0	29.2008	18.5321	101.8	84.9947	53.3627	33.9677	5.13298	-14.6327	-44.1597	-52.4003	0	0	0	0	0	0	0	215.798	137.411	138.368
					7.63914	137.364	109.012	95.8941	82.6096	69.7879	57.9042	47.2786	37.9819	30.0794	23.3697	17.9645	13.6836	10.3438	7.78287	5.85244	4.42315	3.32125	2.49401	0	29.2143	18.551	102.085	85.1558	53.4752	34.0533	5.15392	-14.6957	-44.3761	-52.6454	0	0	0	0	0	0	0	215.971	137.522	138.479
					7.65998	137.082	108.662	95.696	82.4566	69.6555	57.8998	47.2543	38.0114	30.1067	23.4136	18.0195	13.7252	10.3625	7.81045	5.88046	4.43065	3.31311	2.51134	0	29.1205	18.5127	101.896	84.9943	53.4711	34.0358	5.15792	-14.709	-44.4593	-52.8064	0	0	0	0	0	0	0	215.213	137.037	137.994
					7.68081	136.795	108.731	95.7755	82.4512	69.7582	57.9966	47.4075	38.1612	30.2279	23.5068	18.0839	13.7862	10.4151	7.80839	5.90055	4.45342	3.34165	2.51295	0	29.139	18.5281	101.889	85.1196	53.5606	34.1462	5.17825	-14.7683	-44.6364	-52.9952	0	0	0	0	0	0	0	215.161	137.003	137.96
					7.70164	136.504	108.748	95.8216	82.5258	69.9142	58.0434	47.5066	38.1267	30.3094	23.6207	18.1799	13.8472	10.4512	7.87162	5.93037	4.47419	3.36316	2.53004	0	29.1434	18.537	101.981	85.31	53.6038	34.2176	5.17357	-14.8081	-44.8527	-53.2765	0	0	0	0	0	0	0	215.029	136.919	137.876
					7.72248	136.209	108.793	95.6948	82.563	69.8547	58.149	47.6025	38.2891	30.4006	23.6863	18.1969	13.9029	10.506	7.91913	5.95198	4.49848	3.3783	2.53459	0	29.1556	18.5124	102.027	85.2374	53.7013	34.2867	5.19561	-14.8527	-44.9772	-53.3264	0	0	0	0	0	0	0	214.96	136.874	137.832
					7.74331	135.911	108.838	95.9046	82.7847	70.058	58.2944	47.7207	38.4294	30.4993	23.8011	18.3108	13.9724	10.5642	7.93763	5.97774	4.51024	3.38719	2.53882	0	29.1676	18.553	102.301	85.4854	53.8355	34.3718	5.21465	-14.9009	-45.1952	-53.6603	0	0	0	0	0	0	0	215.173	137.011	137.968
					7.76414	135.609	108.771	95.8593	82.6898	70.0458	58.3846	47.8431	38.573	30.6297	23.8776	18.3736	14.0132	10.6011	7.99292	6.0106	4.54045	3.40833	2.54038	0	29.1497	18.5443	102.184	85.4706	53.9189	34.4599	5.23413	-14.9646	-45.3404	-53.8442	0	0	0	0	0	0	0	214.812	136.78	137.737
					7.78498	135.303	108.645	95.8402	82.7485	70.1691	58.4523	47.9283	38.6965	30.7226	23.9322	18.4734	14.0978	10.6738	8.02374	6.04263	4.55867	3.41337	2.57119	0	29.1158	18.5406	102.256	85.621	53.9814	34.5213	5.25088	-15.01	-45.4442	-54.1366	0	0	0	0	0	0	0	214.697	136.706	137.663
					7.80581	134.995	108.635	95.9114	82.8406	70.2722	58.5245	48.0297	38.7394	30.8019	24.0707	18.5708	14.1679	10.714	8.08161	6.07842	4.58274	3.44334	2.58146	0	29.1131	18.5544	102.37	85.7469	54.0481	34.5943	5.25671	-15.0487	-45.7071	-54.4221	0	0	0	0	0	0	0	214.506	136.584	137.541
					7.82664	134.684	108.668	95.8425	82.8227	70.3652	58.6016	48.0773	38.8543	30.8936	24.1148	18.6069	14.2052	10.7486	8.09359	6.09648	4.59494	3.45392	2.57713	0	29.122	18.541	102.348	85.8603	54.1193	34.6286	5.27229	-15.0935	-45.7908	-54.5278	0	0	0	0	0	0	0	214.48	136.567	137.524
					7.84748	134.37	108.675	95.8465	82.9097	70.3259	58.7135	48.2153	38.9489	30.9926	24.2253	18.6952	14.277	10.7871	8.13408	6.09495	4.61629	3.47318	2.63307	0	29.1238	18.5418	102.456	85.8124	54.2226	34.728	5.28514	-15.1419	-46.0006	-54.7866	0	0	0	0	0	0	0	214.24	136.414	137.371
					7.86831	134.054	108.564	95.8265	82.8673	70.4151	58.7405	48.3072	39.0582	31.1055	24.3015	18.7399	14.3144	10.8308	8.15131	6.13902	4.61968	3.46188	2.61483	0	29.0942	18.5379	102.403	85.9212	54.2475	34.7943	5.29997	-15.197	-46.1453	-54.9177	0	0	0	0	0	0	0	214.038	136.285	137.242
					7.88914	133.736	108.574	95.8154	82.9511	70.4679	58.8591	48.3618	39.0974	31.1066	24.3436	18.8124	14.381	10.8884	8.1983	6.17236	4.66102	3.48844	2.62398	0	29.0969	18.5358	102.507	85.9857	54.357	34.8335	5.30528	-15.1976	-46.2254	-55.13	0	0	0	0	0	0	0	214.068	136.304	137.261
					7.90998	133.416	108.568	95.814	82.8976	70.4593	58.8256	48.4396	39.2223	31.2481	24.4354	18.8789	14.391	10.9122	8.22132	6.19046	4.66168	3.49377	2.62912	0	29.0952	18.5355	102.441	85.9751	54.3261	34.8896	5.32223	-15.2667	-46.3996	-55.3249	0	0	0	0	0	0	0	213.593	136	136.957
					7.93081	133.094	108.39	95.7785	82.9851	70.5486	58.9229	48.4938	39.2917	31.3749	24.5719	19.0086	14.6175	11.0307	8.33815	6.28816	4.73768	3.54575	2.66873	0	29.0475	18.5286	102.549	86.0841	54.416	34.9286	5.33165	-15.3287	-46.6589	-55.705	0	0	0	0	0	0	0	213.193	135.743	136.701
					7.95164	132.771	108.44	95.7586	83.0311	70.5678	59.0342	48.5489	39.3371	31.3887	24.61	19.0354	14.6136	11.0306	8.3242	6.27364	4.73466	3.54667	2.67169	0	29.0609	18.5248	102.606	86.1075	54.5188	34.9683	5.33781	-15.3354	-46.7311	-55.7837	0	0	0	0	0	0	0	213.274	135.795	136.752
					7.97248	132.443	108.52	95.8821	83.005	70.5207	58.9691	48.5486	39.3597	31.3877	24.5926	19.0168	14.4831	10.9962	8.24475	6.20252	4.67688	3.50726	2.61726	0	29.0823	18.5487	102.573	86.0501	54.4587	34.9681	5.34088	-15.3349	-46.6981	-55.7292	0	0	0	0	0	0	0	213.26	135.786	136.744
					7.99331	132.072	108.279	95.6674	82.8475	70.4716	58.959	48.5409	39.3856	31.4313	24.6402	19.0651	14.5464	11.0409	8.30699	6.23096	4.69824	3.52633	2.64125	0	29.0178	18.5072	102.379	85.9902	54.4493	34.9626	5.34439	-15.3562	-46.7886	-55.8706	0	0	0	0	0	0	0	212.635	135.386	136.344
					8.01414	131.65	108.162	95.5298	82.7181	70.4373	58.9754	48.6143	39.431	31.4852	24.6627	19.1175	14.6187	11.0866	8.33494	6.27529	4.73266	3.55475	2.66357	0	28.9865	18.4805	102.219	85.9483	54.4645	35.0154	5.35055	-15.3825	-46.8312	-56.0244	0	0	0	0	0	0	0	212.226	135.125	136.082
					8.03499	131.18	108.121	95.5846	82.7136	70.3811	58.8894	48.4957	39.3769	31.4541	24.7053	19.1019	14.5844	11.0752	8.32659	6.26006	4.72345	3.53509	2.64595	0	28.9756	18.4911	102.213	85.8797	54.3851	34.93	5.3432	-15.3673	-46.9121	-55.9785	0	0	0	0	0	0	0	211.96	134.955	135.912
					8.05582	130.663	108.067	95.4469	82.6691	70.3292	58.9394	48.6144	39.4944	31.5632	24.7532	19.1642	14.606	11.1033	8.3914	6.28014	4.73073	3.49826	2.65168	0	28.961	18.4645	102.158	85.8164	54.4313	35.0155	5.35916	-15.4206	-47.0031	-56.1611	0	0	0	0	0	0	0	211.621	134.738	135.695
					8.07666	130.103	108.133	95.5485	82.7099	70.4563	58.9836	48.6863	39.5237	31.5737	24.7733	19.1824	14.603	11.081	8.3113	6.21644	4.6731	3.50098	2.60247	0	28.9787	18.4841	102.209	85.9715	54.4721	35.0673	5.36313	-15.4258	-47.0412	-56.2144	0	0	0	0	0	0	0	211.864	134.893	135.85
					8.09749	129.5	108.427	95.7163	82.9245	70.6128	59.0964	48.7698	39.5823	31.6654	24.8115	19.2433	14.6769	11.1516	8.35408	6.25841	4.69947	3.52954	2.62144	0	29.0573	18.5166	102.474	86.1624	54.5762	35.1274	5.37109	-15.4706	-47.1138	-56.393	0	0	0	0	0	0	0	212.308	135.177	136.134
					8.11832	128.859	108.246	95.6099	82.7951	70.4455	58.982	48.6801	39.5719	31.68	24.8786	19.2805	14.6885	11.1437	8.3644	6.27781	4.72092	3.53716	2.63532	0	29.0089	18.496	102.314	85.9584	54.4706	35.0628	5.36966	-15.4777	-47.2412	-56.5018	0	0	0	0	0	0	0	211.46	134.634	135.592
					8.13916	128.18	108.347	95.6381	82.8569	70.48	59.0164	48.72	39.6157	31.7002	24.9025	19.2965	14.6973	11.1939	8.40851	6.31758	4.74908	3.54334	2.64345	0	29.036	18.5015	102.39	86.0004	54.5023	35.0915	5.37561	-15.4876	-47.2866	-56.5488	0	0	0	0	0	0	0	211.575	134.708	135.665
					8.15999	127.467	108.173	95.411	82.7867	70.4865	59.085	48.8041	39.6949	31.7502	24.926	19.3292	14.7534	11.2266	8.42495	6.3327	4.76788	3.56427	2.62703	0	28.9893	18.4576	102.304	86.0084	54.5657	35.1521	5.38636	-15.512	-47.3313	-56.6447	0	0	0	0	0	0	0	211.375	134.58	135.537
					8.18082	126.721	107.993	95.3611	82.6231	70.3503	58.9508	48.6914	39.5994	31.6802	24.9365	19.3511	14.7601	11.2405	8.42153	6.30393	4.73546	3.55483	2.64456	0	28.9411	18.4479	102.101	85.8421	54.4418	35.071	5.3734	-15.4778	-47.3513	-56.7087	0	0	0	0	0	0	0	210.681	134.136	135.093
					8.20166	125.946	107.714	95.0935	82.412	70.2247	58.8397	48.6166	39.5563	31.6687	24.8671	19.301	14.7548	11.2221	8.42123	6.33225	4.76003	3.56387	2.65948	0	28.8664	18.3961	101.841	85.6889	54.3392	35.0171	5.36755	-15.4722	-47.2194	-56.562	0	0	0	0	0	0	0	210.262	133.868	134.825
					8.22249	125.142	107.669	95.0384	82.4136	70.1739	58.8386	48.5645	39.5139	31.6572	24.8717	19.3174	14.7582	11.2206	8.4415	6.34455	4.76892	3.57628	2.65971	0	28.8543	18.3855	101.843	85.6269	54.3381	34.9796	5.3618	-15.4666	-47.2282	-56.61	0	0	0	0	0	0	0	210.084	133.754	134.711
					8.24332	124.313	107.354	94.9087	82.2428	70.0779	58.742	48.533	39.5145	31.6297	24.885	19.3022	14.7552	11.2354	8.44219	6.33567	4.76284	3.57086	2.65567	0	28.7699	18.3604	101.632	85.5098	54.2489	34.9569	5.36188	-15.4531	-47.2533	-56.5655	0	0	0	0	0	0	0	209.567	133.423	134.38
					8.26416	123.461	107.475	94.8563	82.1946	69.9561	58.6105	48.4217	39.455	31.6329	24.8788	19.3261	14.7761	11.2521	8.44935	6.35528	4.77987	3.57952	2.65538	0	28.8024	18.3502	101.572	85.3611	54.1275	34.8767	5.35381	-15.4547	-47.2417	-56.6356	0	0	0	0	0	0	0	209.112	133.132	134.089
					8.28499	122.589	107.208	94.5966	81.8439	69.712	58.4276	48.3245	39.3457	31.5561	24.8501	19.2898	14.7418	11.2364	8.44205	6.34336	4.76696	3.57865	2.66897	0	28.7307	18.3	101.139	85.0633	53.9586	34.8067	5.33897	-15.4172	-47.1871	-56.5292	0	0	0	0	0	0	0	208.203	132.55	133.507
					8.30582	121.697	106.955	94.4026	81.7318	69.5901	58.3409	48.2474	39.2909	31.5681	24.8636	19.3229	14.7366	11.2474	8.46517	6.36936	4.79485	3.59582	2.67685	0	28.6631	18.2625	101	84.9145	53.8785	34.7511	5.33154	-15.423	-47.2127	-56.6263	0	0	0	0	0	0	0	207.539	132.125	133.082
					8.32666	120.79	106.86	94.2468	81.6983	69.634	58.3426	48.2771	39.3746	31.5903	24.9192	19.364	14.8017	11.2837	8.4906	6.4097	4.80674	3.6187	2.70457	0	28.6376	18.2323	100.959	84.9681	53.8801	34.7725	5.34289	-15.4339	-47.3182	-56.7465	0	0	0	0	0	0	0	207.294	131.968	132.925
					8.34749	119.869	106.566	93.9769	81.3054	69.225	58.0127	48.045	39.1899	31.4785	24.8295	19.3165	14.7836	11.2852	8.51228	6.40477	4.82214	3.61576	2.68775	0	28.5588	18.1801	100.473	84.4691	53.5755	34.6054	5.31784	-15.3793	-47.148	-56.6075	0	0	0	0	0	0	0	206.045	131.169	132.126
					8.36832	118.936	106.333	93.9613	81.3179	69.1876	57.9754	47.9876	39.13	31.448	24.816	19.2952	14.795	11.2937	8.50624	6.40002	4.81561	3.61252	2.70257	0	28.4963	18.1771	100.489	84.4234	53.541	34.564	5.30971	-15.3643	-47.1223	-56.5448	0	0	0	0	0	0	0	205.969	131.12	132.077
					8.38916	117.994	106.268	93.637	80.992	68.9282	57.8247	47.8717	39.0692	31.4429	24.8019	19.3052	14.8336	11.3176	8.52105	6.42061	4.85376	3.63531	2.70543	0	28.4787	18.1144	100.086	84.1069	53.4018	34.4805	5.30145	-15.3619	-47.0956	-56.5742	0	0	0	0	0	0	0	204.938	130.46	131.418
					8.40999	117.045	105.963	93.5478	80.9361	68.8657	57.7646	47.8276	39.011	31.3955	24.7732	19.324	14.8286	11.321	8.52953	6.43074	4.8393	3.62996	2.71087	0	28.3972	18.0971	100.017	84.0306	53.3463	34.4488	5.29356	-15.3387	-47.0411	-56.6293	0	0	0	0	0	0	0	204.621	130.258	131.215
					8.43082	116.091	105.906	93.3796	80.7871	68.6831	57.614	47.6682	38.9159	31.3154	24.7229	19.2721	14.7652	11.2814	8.49846	6.39938	4.8136	3.61711	2.69678	0	28.3818	18.0646	99.8327	83.8078	53.2072	34.334	5.28066	-15.2996	-46.9456	-56.4773	0	0	0	0	0	0	0	204.186	129.979	130.936
					8.45166	115.136	105.938	93.3339	80.7773	68.7158	57.59	47.7069	38.9237	31.3144	24.7323	19.2799	14.7695	11.2972	8.5135	6.41872	4.86256	3.64186	2.70736	0	28.3905	18.0557	99.8206	83.8477	53.185	34.3619	5.28172	-15.2991	-46.9635	-56.5003	0	0	0	0	0	0	0	204.18	129.975	130.933
					8.47249	114.18	105.678	93.1315	80.5556	68.5979	57.561	47.6246	38.8828	31.2944	24.7358	19.299	14.7904	11.3021	8.52178	6.428	4.84133	3.64304	2.72736	0	28.3207	18.0166	99.5466	83.7039	53.1583	34.3026	5.27616	-15.2893	-46.9701	-56.556	0	0	0	0	0	0	0	203.509	129.546	130.503
					8.49332	113.226	105.486	92.8946	80.2613	68.3027	57.319	47.3455	38.7508	31.2473	24.6652	19.2605	14.8234	11.3131	8.49698	6.44576	4.86236	3.65975	2.72474	0	28.2694	17.9707	99.1829	83.3437	52.9347	34.1015	5.25826	-15.2663	-46.8359	-56.4434	0	0	0	0	0	0	0	202.516	128.91	129.867
					8.51416	112.278	105.05	92.5538	79.9949	68.0973	57.0716	47.401	38.7908	31.2529	24.7465	19.3269	14.9232	11.3934	8.62088	6.51828	4.92173	3.69039	2.7811	0	28.1524	17.9048	98.8537	83.0929	52.7063	34.1415	5.26368	-15.269	-46.9904	-56.638	0	0	0	0	0	0	0	201.218	128.08	129.037
					8.53499	111.336	105.16	92.6078	80.0735	68.1994	57.2385	47.4265	38.7557	31.2351	24.7335	19.3546	14.9206	11.3962	8.63674	6.54383	4.93368	3.7032	2.78833	0	28.1819	17.9153	98.9508	83.2176	52.8604	34.1599	5.25892	-15.2603	-46.9658	-56.719	0	0	0	0	0	0	0	201.6	128.324	129.281
					8.55582	110.403	105.148	92.629	80.0253	68.0231	57.0934	47.3068	38.7099	31.2239	24.7405	19.3711	14.9785	11.4346	8.66997	6.54906	4.95896	3.72033	2.79848	0	28.1787	17.9194	98.8912	83.0024	52.7265	34.0737	5.25271	-15.2549	-46.979	-56.7675	0	0	0	0	0	0	0	201.043	127.968	128.925
					8.57666	109.482	104.736	92.2778	79.8442	67.9209	56.9824	47.2234	38.6521	31.1509	24.713	19.3372	14.9743	11.4476	8.69813	6.59216	4.97662	3.74827	2.8349	0	28.0683	17.8514	98.6674	82.8778	52.624	34.0136	5.24486	-15.2192	-46.9268	-56.668	0	0	0	0	0	0	0	200.534	127.642	128.599
					8.59749	108.575	104.555	92.1437	79.6827	67.7952	56.9122	47.22	38.6005	31.1518	24.7168	19.3866	15.0337	11.4665	8.74945	6.61123	5.00016	3.75291	2.86473	0	28.0197	17.8255	98.4679	82.7244	52.5591	34.0112	5.23786	-15.2197	-46.934	-56.8128	0	0	0	0	0	0	0	199.879	127.223	128.18
					8.61832	107.685	104.44	91.9678	79.4844	67.6422	56.736	47.0623	38.4818	31.1002	24.6827	19.3134	14.9482	11.4152	8.68076	6.56264	4.97232	3.73413	2.80282	0	27.9891	17.7914	98.2229	82.5376	52.3964	33.8976	5.22175	-15.1945	-46.8693	-56.5983	0	0	0	0	0	0	0	199.395	126.913	127.87
					8.63917	106.812	104.305	91.7644	79.3254	67.5233	56.6411	46.9809	38.4593	31.0605	24.6726	19.3025	14.9705	11.4355	8.68971	6.58378	4.98057	3.73619	2.81179	0	27.9528	17.7521	98.0263	82.3927	52.3088	33.8389	5.21869	-15.1751	-46.85	-56.5663	0	0	0	0	0	0	0	198.899	126.595	127.553
					8.66	105.961	104.047	91.6032	79.2092	67.3225	56.5349	46.9334	38.4214	31.0573	24.6394	19.3358	14.9999	11.4519	8.72647	6.60972	4.99562	3.7574	2.83386	0	27.8837	17.7209	97.8828	82.1476	52.2106	33.8047	5.21356	-15.1735	-46.787	-56.6639	0	0	0	0	0	0	0	198.24	126.173	127.131
					8.68083	105.133	104.081	91.5275	78.8997	67.1435	56.3773	46.7568	38.3291	30.9672	24.6345	19.3141	15.0284	11.4756	8.72665	6.62713	5.02334	3.76016	2.84647	0	27.8927	17.7063	97.5003	81.9292	52.0651	33.6775	5.20103	-15.1295	-46.7777	-56.6002	0	0	0	0	0	0	0	197.465	125.677	126.635
					8.70167	104.33	103.892	91.3155	78.9285	67.1329	56.348	46.7197	38.3044	30.9355	24.5882	19.2813	14.9867	11.4748	8.73105	6.61956	5.02727	3.77734	2.86857	0	27.842	17.6653	97.5359	81.9162	52.0381	33.6508	5.19768	-15.114	-46.6898	-56.5042	0	0	0	0	0	0	0	197.538	125.724	126.682
					8.7225	103.555	103.797	91.1903	78.7736	66.9281	56.1764	46.554	38.1166	30.8013	24.4592	19.2294	14.9219	11.412	8.67738	6.58448	4.97648	3.75712	2.81755	0	27.8167	17.641	97.3444	81.6664	51.8796	33.5314	5.1722	-15.0484	-46.4448	-56.3522	0	0	0	0	0	0	0	197.206	125.512	126.469
					8.74333	102.811	103.598	91.0311	78.6022	66.8269	56.0795	46.4407	38.02	30.7436	24.4315	19.1819	14.9006	11.4143	8.68085	6.58741	4.98536	3.75084	2.83087	0	27.7633	17.6102	97.1327	81.5429	51.7901	33.4498	5.15909	-15.0202	-46.3922	-56.2128	0	0	0	0	0	0	0	196.823	125.267	126.224
					8.76417	102.098	103.457	90.8332	78.4051	66.6671	55.9195	46.3371	37.9104	30.5966	24.3583	19.0851	14.7659	11.3344	8.63177	6.54316	4.95358	3.73519	2.79397	0	27.7256	17.572	96.889	81.3479	51.6424	33.3752	5.14422	-14.9484	-46.2533	-55.9293	0	0	0	0	0	0	0	196.565	125.102	126.059
					8.785	101.421	103.575	90.8424	78.3301	66.5275	55.7298	46.1915	37.8359	30.5575	24.2683	19.0336	14.7029	11.2868	8.59194	6.46479	4.89285	3.70232	2.76817	0	27.7571	17.5737	96.7965	81.1775	51.4671	33.2704	5.1341	-14.9293	-46.0823	-55.7782	0	0	0	0	0	0	0	196.387	124.988	125.945
					8.80583	100.78	103.231	90.6504	78.1228	66.2843	55.4935	45.9775	37.6431	30.4153	24.1735	18.9685	14.6301	11.2263	8.5443	6.46325	4.91466	3.6952	2.76016	0	27.6649	17.5366	96.5403	80.8808	51.2489	33.1162	5.10794	-14.8598	-45.9023	-55.5875	0	0	0	0	0	0	0	195.746	124.578	125.535
					8.82667	100.179	103.083	90.4115	78.0279	66.2307	55.4126	45.9192	37.6114	30.429	24.1627	18.9601	14.6584	11.277	8.55126	6.47338	4.88445	3.70895	2.76747	0	27.6254	17.4904	96.423	80.8154	51.1742	33.0743	5.10364	-14.8665	-45.8819	-55.563	0	0	0	0	0	0	0	195.395	124.353	125.31
					8.8475	99.62	102.888	90.2283	77.6732	65.9487	55.2878	45.8019	37.4497	30.27	24.081	18.9166	14.5846	11.2339	8.53936	6.47021	4.86742	3.69274	2.76294	0	27.573	17.4549	95.9847	80.4713	51.059	32.9897	5.0817	-14.7888	-45.7267	-55.4354	0	0	0	0	0	0	0	194.663	123.885	124.842
					8.86833	99.1046	102.752	90.0654	77.4766	65.7769	55.0837	45.6235	37.3725	30.2028	24.0314	18.8717	14.552	11.2167	8.51421	6.46417	4.89271	3.70007	2.76011	0	27.5365	17.4234	95.7417	80.2616	50.8704	32.8612	5.07123	-14.756	-45.6325	-55.3038	0	0	0	0	0	0	0	194.074	123.507	124.464
					8.88917	98.6356	102.586	89.8637	77.3065	65.7016	54.9087	45.6187	37.3201	30.2377	24.0788	18.9597	14.7009	11.3012	8.61022	6.53573	4.95526	3.73767	2.80354	0	27.4921	17.3844	95.5315	80.1698	50.7088	32.8578	5.06411	-14.7731	-45.7226	-55.5618	0	0	0	0	0	0	0	193.151	122.917	123.874
					8.91	98.2153	102.587	89.8531	77.3791	65.5548	54.9066	45.5357	37.2918	30.147	24.0359	18.9015	14.6636	11.2872	8.59455	6.52378	4.94557	3.73613	2.81021	0	27.4925	17.3823	95.6212	79.9906	50.7069	32.798	5.06027	-14.7288	-45.6411	-55.3911	0	0	0	0	0	0	0	193.291	123.006	123.963
					8.93083	97.8459	102.251	89.5282	77.109	65.3476	54.721	45.3943	37.1823	30.0864	23.9383	18.8706	14.6201	11.2568	8.57211	6.50246	4.94383	3.72243	2.80582	0	27.4023	17.3195	95.2874	79.7378	50.5355	32.6961	5.04541	-14.6991	-45.4556	-55.3006	0	0	0	0	0	0	0	192.569	122.544	123.501
					8.95167	97.5297	102.281	89.6154	77.0728	65.3979	54.6929	45.3461	37.1409	30.0537	23.9221	18.8476	14.6178	11.2497	8.57602	6.49587	4.94836	3.73316	2.80273	0	27.4103	17.3364	95.2427	79.7992	50.5095	32.6614	5.03979	-14.6831	-45.4249	-55.2332	0	0	0	0	0	0	0	192.658	122.601	123.558
					8.9725	97.2652	102.09	89.4358	76.8833	65.2129	54.5723	45.2178	37.0472	30.0034	23.87	18.797	14.5699	11.2484	8.57142	6.52171	4.95032	3.73259	2.81015	0	27.3593	17.3016	95.0085	79.5734	50.3982	32.569	5.02709	-14.6586	-45.326	-55.0851	0	0	0	0	0	0	0	192.167	122.287	123.244
					8.99333	97.0184	101.848	89.127	76.7027	64.9737	54.3935	45.084	36.9612	29.9379	23.8359	18.7701	14.5533	11.2346	8.5603	6.51899	4.93995	3.72525	2.80057	0	27.2943	17.2419	94.7854	79.2816	50.233	32.4727	5.01541	-14.6266	-45.2613	-55.0063	0	0	0	0	0	0	0	191.43	121.815	122.773
					9.01417	96.781	101.544	88.8356	76.3582	64.6507	54.0595	44.8517	36.7657	29.7899	23.7353	18.7074	14.4757	11.1788	8.52728	6.47992	4.93407	3.72373	2.79395	0	27.2128	17.1855	94.3597	78.8874	49.9246	32.3054	4.98889	-14.5543	-45.0702	-54.8225	0	0	0	0	0	0	0	190.417	121.167	122.124
					9.035	96.5528	101.461	88.7079	76.2105	64.613	54.0177	44.7602	36.6643	29.6997	23.6707	18.6516	14.5008	11.1983	8.53469	6.48474	4.92031	3.73572	2.75508	0	27.1906	17.1608	94.1771	78.8414	49.886	32.2395	4.97513	-14.5102	-44.9477	-54.6588	0	0	0	0	0	0	0	190.354	121.127	122.084
					9.05583	96.3333	101.199	88.4888	76.0311	64.2874	53.8627	44.6577	36.5711	29.6632	23.6729	18.6559	14.4995	11.1744	8.51663	6.4946	4.93741	3.7464	2.78233	0	27.1203	17.1184	93.9554	78.4441	49.7428	32.1656	4.96248	-14.4924	-44.9517	-54.6716	0	0	0	0	0	0	0	189.393	120.512	121.469
					9.07667	96.1221	102.049	89.1151	76.5681	64.7093	54.1617	44.8063	36.7171	29.7379	23.692	18.6662	14.4839	11.2096	8.53049	6.48582	4.93164	3.72175	2.78602	0	27.3483	17.2396	94.619	78.959	50.0189	32.2726	4.9823	-14.5289	-44.988	-54.7017	0	0	0	0	0	0	0	191.221	121.682	122.639
					9.0975	95.919	102.148	89.2023	76.5328	64.6848	54.0612	44.7271	36.6661	29.6846	23.6396	18.6593	14.5029	11.1846	8.52838	6.49951	4.90851	3.70851	2.78425	0	27.3746	17.2565	94.5755	78.929	49.9262	32.2156	4.97537	-14.5028	-44.8886	-54.6814	0	0	0	0	0	0	0	191.18	121.655	122.612
					9.11833	95.7235	101.871	88.8113	76.1481	64.3684	53.7835	44.4987	36.4726	29.5349	23.535	18.521	14.3876	11.0892	8.45707	6.4388	4.88216	3.67932	2.7561	0	27.3005	17.1808	94.1	78.5429	49.6697	32.0511	4.94912	-14.4297	-44.69	-54.2763	0	0	0	0	0	0	0	190.398	121.155	122.112
					9.13917	95.5353	101.869	88.7785	76.0232	64.2344	53.6895	44.3767	36.3305	29.4447	23.4775	18.5042	14.3738	11.128	8.4592	6.43066	4.87934	3.68358	2.7572	0	27.3001	17.1745	93.9457	78.3795	49.5829	31.9632	4.92983	-14.3856	-44.5808	-54.2269	0	0	0	0	0	0	0	190.082	120.953	121.91
					9.16	95.354	101.578	88.6397	76.0413	64.2347	53.6565	44.3794	36.3755	29.4908	23.5146	18.5174	14.3925	11.1214	8.4793	6.4488	4.90164	3.69802	2.77987	0	27.2221	17.1476	93.968	78.3799	49.5524	31.9652	4.93594	-14.4082	-44.6513	-54.2656	0	0	0	0	0	0	0	189.846	120.802	121.759
					9.18083	95.1793	101.343	88.3906	75.6745	63.9329	53.3494	44.2153	36.2	29.3692	23.4161	18.4741	14.3719	11.0705	8.44567	6.38293	4.8629	3.66996	2.74656	0	27.1591	17.0994	93.5148	78.0116	49.2688	31.847	4.91212	-14.3487	-44.4642	-54.1387	0	0	0	0	0	0	0	188.861	120.171	121.128
					9.20167	95.0108	101.353	88.3404	75.653	63.8391	53.3604	44.1573	36.1876	29.3406	23.3994	18.4615	14.347	11.1035	8.45889	6.42089	4.88548	3.70135	2.77487	0	27.1617	17.0897	93.4882	77.8971	49.2789	31.8052	4.91044	-14.3348	-44.4324	-54.1018	0	0	0	0	0	0	0	188.762	120.108	121.065
					9.2225	94.8482	101.272	88.2155	75.5137	63.733	53.2037	44.0281	36.0878	29.2862	23.393	18.4682	14.3419	11.1003	8.47108	6.45683	4.8881	3.69846	2.77025	0	27.14	17.0655	93.3161	77.7676	49.1342	31.7121	4.89689	-14.3082	-44.4202	-54.1214	0	0	0	0	0	0	0	188.183	119.737	120.694
					9.24333	94.691	101.14	88.0885	75.3113	63.6722	53.1316	43.9705	35.9993	29.2103	23.3019	18.3998	14.3232	11.0842	8.44388	6.4489	4.90097	3.69892	2.77999	0	27.1045	17.041	93.0659	77.6934	49.0677	31.6706	4.88488	-14.2711	-44.2472	-53.9209	0	0	0	0	0	0	0	188.089	119.677	120.634
					9.26418	94.5389	101.065	87.9485	75.202	63.5178	52.9801	43.8506	35.9487	29.1345	23.2529	18.3981	14.3164	11.0824	8.43009	6.42613	4.87964	3.7075	2.76138	0	27.0845	17.0139	92.9308	77.505	48.9278	31.5842	4.87803	-14.2341	-44.1543	-53.916	0	0	0	0	0	0	0	187.62	119.377	120.334
					9.285	94.3917	101.061	87.803	75.0955	63.416	52.8472	43.7831	35.9028	29.0961	23.2311	18.3625	14.2631	11.0635	8.4258	6.41672	4.88444	3.69089	2.76308	0	27.0834	16.9858	92.7993	77.3809	48.805	31.5356	4.8718	-14.2153	-44.1128	-53.8116	0	0	0	0	0	0	0	187.322	119.186	120.143
					9.30583	94.2488	100.677	87.6389	74.9205	63.1949	52.6747	43.6731	35.7965	29.0311	23.1698	18.3206	14.2151	11.027	8.42256	6.39907	4.86974	3.6862	2.75923	0	26.9806	16.954	92.583	77.1111	48.6457	31.4564	4.85737	-14.1836	-43.9964	-53.6887	0	0	0	0	0	0	0	186.719	118.8	119.758
					9.32668	94.1099	100.658	87.6471	74.8617	63.1401	52.6733	43.5507	35.6554	28.926	23.087	18.2241	14.2025	10.9876	8.39418	6.39935	4.84729	3.68017	2.75551	0	26.9753	16.9556	92.5104	77.0442	48.6444	31.3682	4.83822	-14.1322	-43.8392	-53.406	0	0	0	0	0	0	0	186.959	118.954	119.911
					9.34751	93.9748	100.612	87.4375	74.7456	63.0059	52.5311	43.4221	35.5291	28.8449	23.0614	18.21	14.1622	10.9772	8.40926	6.3865	4.87012	3.68502	2.76697	0	26.9631	16.9151	92.3669	76.8804	48.5131	31.2756	4.82109	-14.0926	-43.7906	-53.3648	0	0	0	0	0	0	0	186.487	118.652	119.609
					9.36834	93.8429	100.479	87.4005	74.7392	62.9943	52.5658	43.4596	35.5935	28.8356	23.0452	18.2272	14.1633	10.9982	8.39469	6.38805	4.86473	3.68131	2.7697	0	26.9275	16.9079	92.359	76.8662	48.5451	31.3027	4.82982	-14.088	-43.7598	-53.4152	0	0	0	0	0	0	0	186.475	118.644	119.601
					9.38918	93.7141	100.346	87.1876	74.4706	62.7833	52.3599	43.3098	35.4804	28.8177	23.0099	18.1966	14.1881	11.0199	8.42798	6.42504	4.89037	3.71842	2.77851	0	26.892	16.8667	92.0271	76.6088	48.355	31.1948	4.81448	-14.0793	-43.6928	-53.3254	0	0	0	0	0	0	0	185.661	118.123	119.081
					9.41001	93.5878	100.366	87.1678	74.4464	62.7528	52.3083	43.2549	35.4559	28.8104	23.0102	18.1909	14.1864	11.0176	8.43105	6.43532	4.89451	3.69918	2.77545	0	26.8971	16.8629	91.9971	76.5716	48.3073	31.1552	4.81115	-14.0757	-43.6933	-53.3089	0	0	0	0	0	0	0	185.524	118.036	118.993
					9.43084	93.4638	100.346	87.107	74.3322	62.6466	52.2502	43.1798	35.398	28.6938	22.928	18.1459	14.1805	10.9652	8.39591	6.39743	4.8716	3.69812	2.77037	0	26.8919	16.8511	91.856	76.4421	48.2536	31.1011	4.8033	-14.0188	-43.5373	-53.1769	0	0	0	0	0	0	0	185.466	117.998	118.956
					9.45168	93.3417	100.141	86.7951	74.1684	62.4395	52.044	43.0119	35.2353	28.6078	22.876	18.1318	14.1025	10.9596	8.37588	6.38425	4.86126	3.69037	2.76197	0	26.8369	16.7908	91.6536	76.1893	48.0632	30.9802	4.78122	-13.9767	-43.4385	-53.1355	0	0	0	0	0	0	0	184.745	117.537	118.494
					9.47251	93.221	100.044	86.8733	74.0438	62.3487	51.948	42.947	35.1968	28.5168	22.7969	18.0348	14.0336	10.9323	8.34774	6.36401	4.85685	3.68142	2.75051	0	26.8109	16.8059	91.4996	76.0786	47.9746	30.9335	4.77599	-13.9323	-43.2884	-52.8515	0	0	0	0	0	0	0	184.807	117.576	118.534
					9.49334	93.1016	99.9651	86.56	73.8125	62.1737	51.8199	42.8393	35.0584	28.4733	22.7949	18.0489	14.0622	10.9329	8.36493	6.38886	4.86081	3.68012	2.76362	0	26.7897	16.7453	91.2138	75.865	47.8563	30.8559	4.75722	-13.911	-43.2845	-52.8926	0	0	0	0	0	0	0	183.995	117.057	118.014
					9.51418	92.9829	99.837	86.6446	73.8174	62.1789	51.8427	42.8839	35.1499	28.5238	22.8468	18.1248	14.1838	11.0152	8.44661	6.46895	4.92663	3.72877	2.80779	0	26.7554	16.7617	91.2198	75.8713	47.8774	30.888	4.76963	-13.9357	-43.3832	-53.1151	0	0	0	0	0	0	0	183.709	116.874	117.831
					9.53501	92.8647	99.6599	86.4296	73.8171	62.2145	51.8208	42.8536	35.136	28.5415	22.8604	18.1172	14.2711	11.0404	8.49863	6.49401	4.96265	3.75106	2.83126	0	26.7079	16.7201	91.2195	75.9147	47.8571	30.8662	4.76774	-13.9444	-43.4089	-53.0927	0	0	0	0	0	0	0	183.607	116.809	117.766
					9.55584	92.7465	99.563	86.4568	73.7545	62.1414	51.7962	42.8586	35.1664	28.5887	22.926	18.1822	14.3793	11.1172	8.57656	6.5817	5.02701	3.79851	2.86702	0	26.682	16.7253	91.1422	75.8256	47.8344	30.8698	4.77187	-13.9674	-43.5336	-53.2834	0	0	0	0	0	0	0	183.067	116.463	117.42
					9.57668	92.6281	99.4892	86.395	73.6377	62.0079	51.7081	42.7368	35.1126	28.5048	22.897	18.1966	14.3458	11.098	8.59626	6.56964	5.01453	3.78532	2.8717	0	26.6622	16.7134	90.9978	75.6626	47.7531	30.782	4.76457	-13.9264	-43.4785	-53.3254	0	0	0	0	0	0	0	182.605	116.167	117.125
					9.59751	92.509	99.2671	86.1441	73.4954	61.8495	51.5775	42.6393	34.9492	28.4255	22.7799	18.0631	14.2641	11.0556	8.52094	6.5388	4.99261	3.77776	2.8609	0	26.6027	16.6648	90.822	75.4694	47.6325	30.7118	4.7424	-13.8877	-43.2561	-52.9344	0	0	0	0	0	0	0	182.567	116.143	117.1
					9.61834	92.3889	99.3533	86.0577	73.3915	61.6835	51.4484	42.5154	34.853	28.3478	22.7159	18.0277	14.1584	10.9897	8.44568	6.48327	4.94642	3.73637	2.80634	0	26.6258	16.6481	90.6935	75.2668	47.5132	30.6226	4.72934	-13.8497	-43.1346	-52.8306	0	0	0	0	0	0	0	182.285	115.962	116.919
					9.63918	92.2675	99.3604	86.02	73.289	61.6268	51.3435	42.3835	34.718	28.2169	22.5785	17.9218	14.0342	10.9276	8.38881	6.41943	4.88023	3.71039	2.78956	0	26.6277	16.6408	90.5669	75.1977	47.4163	30.5276	4.71103	-13.7857	-42.8737	-52.5201	0	0	0	0	0	0	0	182.508	116.105	117.063
					9.66001	92.1443	99.2165	85.9163	73.2579	61.613	51.3011	42.3628	34.7762	28.243	22.6088	17.9144	14.0023	10.8848	8.37919	6.38497	4.88612	3.69699	2.76482	0	26.5891	16.6208	90.5284	75.1808	47.3772	30.5126	4.71893	-13.7985	-42.9311	-52.4984	0	0	0	0	0	0	0	182.3	115.972	116.929
					9.68084	92.0191	99.1152	85.8678	73.1099	61.4741	51.1961	42.242	34.6044	28.1231	22.5235	17.8669	13.9527	10.8769	8.33778	6.36915	4.87248	3.6827	2.75795	0	26.562	16.6114	90.3456	75.0113	47.2803	30.4256	4.69561	-13.74	-42.7692	-52.3593	0	0	0	0	0	0	0	182.063	115.821	116.778
					9.70168	91.8914	99.0006	85.8163	73.1349	61.4756	51.1463	42.258	34.6398	28.1165	22.5313	17.8989	14.0023	10.8999	8.36935	6.39914	4.88006	3.69233	2.77439	0	26.5313	16.6014	90.3765	75.0132	47.2342	30.4371	4.70042	-13.7367	-42.7839	-52.453	0	0	0	0	0	0	0	181.92	115.729	116.686
					9.72251	91.7609	98.9535	85.5199	72.9653	61.4319	51.1522	42.2279	34.6352	28.1357	22.5422	17.9144	14.0068	10.9309	8.37522	6.42322	4.89772	3.71555	2.80399	0	26.5186	16.5441	90.1669	74.9599	47.2397	30.4155	4.69979	-13.7461	-42.8047	-52.4985	0	0	0	0	0	0	0	181.495	115.457	116.414
					9.74334	91.6272	98.9437	85.6665	72.8737	61.2879	51.004	42.1322	34.5252	28.0606	22.4954	17.8521	13.9762	10.8999	8.3765	6.42556	4.9047	3.72701	2.79551	0	26.516	16.5724	90.0536	74.7841	47.1028	30.3466	4.68486	-13.7094	-42.7159	-52.316	0	0	0	0	0	0	0	181.319	115.344	116.302
					9.76418	91.49	98.772	85.6496	72.813	61.2087	50.9464	42.1228	34.5551	28.1198	22.5282	17.9046	14.0918	10.9901	8.44468	6.49699	4.97854	3.78013	2.85646	0	26.47	16.5692	89.9787	74.6874	47.0496	30.3398	4.68892	-13.7383	-42.7781	-52.4697	0	0	0	0	0	0	0	180.798	115.011	115.968
					9.78501	91.3489	98.809	85.5557	72.7847	61.2786	50.9709	42.1636	34.5481	28.1319	22.5683	17.9602	14.1194	10.966	8.4623	6.52346	4.97637	3.76471	2.85142	0	26.4799	16.551	89.9437	74.7728	47.0723	30.3692	4.68797	-13.7442	-42.8542	-52.6327	0	0	0	0	0	0	0	180.646	114.913	115.871
					9.80584	91.2036	98.7741	85.545	72.7069	61.1272	50.8346	41.9585	34.4247	28.0119	22.4811	17.8696	14.019	10.9329	8.40751	6.44162	4.91469	3.73772	2.80192	0	26.4706	16.5489	89.8475	74.588	46.9464	30.2215	4.67123	-13.6856	-42.6887	-52.3672	0	0	0	0	0	0	0	180.553	114.854	115.811
					9.82668	91.0536	98.7545	85.1047	72.6217	61.0972	50.802	41.9747	34.4186	27.9697	22.4324	17.8568	13.9561	10.9136	8.37451	6.42678	4.907	3.7348	2.79743	0	26.4653	16.4638	89.7422	74.5514	46.9162	30.2331	4.6704	-13.665	-42.5962	-52.3296	0	0	0	0	0	0	0	180.452	114.789	115.746
					9.84751	90.8987	98.6344	85.1603	72.5893	60.9584	50.7225	41.8577	34.3336	27.9161	22.401	17.8313	13.9571	10.9258	8.38202	6.42427	4.89613	3.73078	2.80751	0	26.4331	16.4745	89.7022	74.3821	46.8428	30.1489	4.65886	-13.6388	-42.5365	-52.2551	0	0	0	0	0	0	0	180.212	114.636	115.593
					9.86834	90.7385	98.523	85.3464	72.641	61.0316	50.7906	41.95	34.3753	27.9579	22.4388	17.8414	13.9629	10.8979	8.38549	6.42345	4.90759	3.7199	2.80845	0	26.4033	16.5105	89.7661	74.4714	46.9058	30.2153	4.66452	-13.6592	-42.6083	-52.2846	0	0	0	0	0	0	0	180.385	114.746	115.704
					9.88918	90.5726	98.5753	85.3015	72.6435	61.0253	50.7961	41.984	34.4564	28.044	22.4806	17.8916	14.1079	10.9908	8.47451	6.50048	4.96995	3.77901	2.83924	0	26.4173	16.5018	89.7692	74.4636	46.9108	30.2398	4.67553	-13.7013	-42.6877	-52.4317	0	0	0	0	0	0	0	180.158	114.601	115.558
					9.91001	90.4006	98.4923	85.2709	72.5503	60.9454	50.7783	41.9814	34.3827	27.9736	22.4537	17.8804	14.0508	10.9608	8.44213	6.47742	4.9343	3.75344	2.81748	0	26.3951	16.4959	89.654	74.3662	46.8943	30.2379	4.66552	-13.6669	-42.6366	-52.399	0	0	0	0	0	0	0	180.006	114.504	115.461
					9.93084	90.2222	98.501	85.2833	72.4803	60.8455	50.6843	41.8437	34.3491	27.9743	22.4591	17.8883	14.0515	10.9749	8.45825	6.49143	4.97944	3.77066	2.82998	0	26.3974	16.4983	89.5675	74.2443	46.8076	30.1388	4.66096	-13.6672	-42.647	-52.4221	0	0	0	0	0	0	0	179.578	114.23	115.188
					9.95168	90.037	98.5502	85.1792	72.3667	60.855	50.6511	41.8839	34.3109	27.9323	22.446	17.8647	14.0379	10.9683	8.46472	6.4955	4.95745	3.75828	2.84834	0	26.4106	16.4782	89.4271	74.2558	46.7769	30.1677	4.65579	-13.6467	-42.622	-52.353	0	0	0	0	0	0	0	179.55	114.212	115.17
					9.97252	89.8455	98.4551	85.1693	72.5186	60.8304	50.6652	41.8825	34.3641	27.9896	22.4437	17.8797	14.0406	10.9631	8.46534	6.47925	4.95591	3.76558	2.81686	0	26.3851	16.4763	89.6149	74.2259	46.7899	30.1667	4.66301	-13.6747	-42.6176	-52.397	0	0	0	0	0	0	0	179.632	114.265	115.222
					9.99336	89.6509	98.2999	85.0441	72.2722	60.752	50.5578	41.7428	34.2977	27.9463	22.425	17.8778	14.0661	10.9952	8.47413	6.50534	4.94901	3.77111	2.83418	0	26.3435	16.452	89.3104	74.1302	46.6908	30.0661	4.65399	-13.6536	-42.5823	-52.3914	0	0	0	0	0	0	0	179.02	113.873	114.83
					10.0142	89.4532	98.3739	85.0214	72.3713	60.8128	50.5962	41.8568	34.3428	27.9413	22.4224	17.875	14.0385	10.9623	8.44754	6.49351	4.97348	3.74787	2.8522	0	26.3633	16.4476	89.4328	74.2044	46.7262	30.1482	4.66011	-13.6511	-42.5772	-52.3831	0	0	0	0	0	0	0	179.371	114.098	115.055
					10.035	89.2527	98.2189	85.1164	72.4165	60.8478	50.5938	41.7922	34.2818	27.9522	22.4454	17.9255	14.0833	11.0074	8.49764	6.51894	4.97836	3.7689	2.83602	0	26.3218	16.466	89.4887	74.2471	46.7239	30.1017	4.65183	-13.6564	-42.621	-52.531	0	0	0	0	0	0	0	179.193	113.983	114.941
					10.0559	89.0493	98.524	85.0659	72.3376	60.7632	50.6097	41.8034	34.2754	27.9171	22.4253	17.8914	14.0251	11.0035	8.47694	6.51559	4.97575	3.78127	2.84309	0	26.4035	16.4563	89.3911	74.1439	46.7386	30.1097	4.65097	-13.6393	-42.5828	-52.431	0	0	0	0	0	0	0	179.241	114.014	114.972
					10.0767	88.843	99.4198	86.0449	73.2186	61.5724	51.2608	42.3404	34.7948	28.3292	22.8058	18.1894	14.3124	11.2182	8.6515	6.64715	5.08397	3.87173	2.90392	0	26.6436	16.6456	90.4799	75.1312	47.34	30.4965	4.72144	-13.8406	-43.3053	-53.3043	0	0	0	0	0	0	0	181.008	115.145	116.102
					10.0975	88.6338	99.4251	85.8871	73.0128	61.3889	51.1062	42.2372	34.6944	28.2554	22.7354	18.1286	14.2907	11.1701	8.59982	6.63092	5.07249	3.85212	2.89576	0	26.645	16.6151	90.2255	74.9073	47.1972	30.4222	4.70782	-13.8046	-43.1716	-53.1262	0	0	0	0	0	0	0	180.618	114.895	115.853
					10.1184	88.4219	99.2197	85.7096	73.0051	61.3218	50.9985	42.1759	34.5966	28.2305	22.7321	18.12	14.265	11.163	8.61084	6.60114	5.05044	3.82531	2.8986	0	26.59	16.5808	90.216	74.8254	47.0977	30.378	4.69456	-13.7924	-43.1654	-53.101	0	0	0	0	0	0	0	180.324	114.707	115.664
					10.1392	88.2072	99.1128	85.5019	72.7642	61.1159	50.8858	42.0582	34.5458	28.173	22.6683	18.1065	14.2506	11.1413	8.59556	6.60254	5.06275	3.85484	2.88956	0	26.5613	16.5406	89.9183	74.5743	46.9937	30.2933	4.68766	-13.7643	-43.0442	-53.0615	0	0	0	0	0	0	0	179.699	114.307	115.265
					10.16	87.9898	99.1036	85.5824	72.7128	61.1223	50.8909	41.9839	34.519	28.1624	22.6685	18.0932	14.2386	11.1304	8.59016	6.59761	5.04995	3.82143	2.86559	0	26.5589	16.5562	89.8549	74.582	46.9983	30.2398	4.68402	-13.7592	-43.0445	-53.0224	0	0	0	0	0	0	0	179.648	114.275	115.232
					10.1809	87.7697	99.2122	85.6049	72.8567	61.2567	50.9115	42.0745	34.5556	28.1693	22.6508	18.0818	14.2512	11.154	8.62438	6.58765	5.04069	3.81686	2.8602	0	26.588	16.5605	90.0326	74.7461	47.0173	30.305	4.68898	-13.7625	-43.0109	-52.9891	0	0	0	0	0	0	0	180.176	114.613	115.57
					10.2017	87.5469	99.0406	85.5065	72.6976	61.0966	50.8878	42.0674	34.4858	28.1308	22.656	18.0705	14.2156	11.148	8.59407	6.6163	5.05305	3.82176	2.86391	0	26.542	16.5415	89.8361	74.5507	46.9955	30.2999	4.67952	-13.7437	-43.0208	-52.956	0	0	0	0	0	0	0	179.725	114.324	115.281
					10.2225	87.3215	98.9226	85.4777	72.6546	60.9838	50.744	41.9381	34.4714	28.0395	22.6518	18.0426	14.2109	11.1307	8.5627	6.58348	5.10256	3.82163	2.87138	0	26.5104	16.5359	89.7829	74.413	46.8627	30.2067	4.67757	-13.6991	-43.0128	-52.8742	0	0	0	0	0	0	0	179.403	114.118	115.075
					10.2434	87.0935	98.8017	85.3664	72.5633	60.9554	50.7533	41.9889	34.4479	28.1172	22.6396	18.1087	14.2128	11.136	8.6018	6.61713	5.06034	3.84586	2.87441	0	26.478	16.5144	89.6701	74.3784	46.8713	30.2434	4.67437	-13.7371	-42.9896	-53.0678	0	0	0	0	0	0	0	179.035	113.883	114.84
					10.2642	86.863	99.0415	85.5985	72.8237	61.0341	50.8243	42.0298	34.5699	28.1739	22.6719	18.1465	14.3003	11.1773	8.65261	6.62104	5.07209	3.86074	2.90214	0	26.5422	16.5593	89.9918	74.4744	46.9369	30.2728	4.69093	-13.7648	-43.0511	-53.1786	0	0	0	0	0	0	0	179.474	114.163	115.121
					10.285	86.6299	99.0116	85.4817	72.6749	61.0859	50.8432	42.0686	34.5535	28.182	22.6709	18.1331	14.2944	11.1939	8.65558	6.63389	5.07294	3.84358	2.88097	0	26.5342	16.5367	89.808	74.5376	46.9543	30.3008	4.6887	-13.7687	-43.049	-53.1394	0	0	0	0	0	0	0	179.403	114.118	115.075
					10.3059	86.3943	99.0646	85.5396	72.7057	60.9977	50.8298	42.0518	34.5442	28.1955	22.6908	18.1543	14.2951	11.2205	8.61609	6.65262	5.07866	3.86832	2.894	0	26.5484	16.5479	89.8461	74.43	46.942	30.2887	4.68744	-13.7753	-43.0869	-53.2016	0	0	0	0	0	0	0	179.227	114.005	114.962
					10.3267	86.1562	98.9836	85.4712	72.6952	61.0724	50.869	42.1123	34.6078	28.247	22.7811	18.2088	14.3203	11.2559	8.68297	6.6686	5.09756	3.85792	2.90415	0	26.5267	16.5347	89.833	74.5211	46.9782	30.3322	4.69607	-13.8005	-43.2583	-53.3613	0	0	0	0	0	0	0	179.002	113.861	114.819
					10.3475	85.9157	98.9058	85.4292	72.5512	60.9273	50.7365	42.0055	34.5265	28.187	22.6856	18.144	14.2876	11.2128	8.65913	6.65265	5.10515	3.89227	2.90278	0	26.5059	16.5265	89.6551	74.3441	46.8558	30.2553	4.68503	-13.7711	-43.0771	-53.1712	0	0	0	0	0	0	0	178.808	113.737	114.695
					10.3684	85.6728	99.1349	85.6601	72.8251	61.1583	50.8699	42.1174	34.645	28.2733	22.7812	18.2054	14.3537	11.2585	8.68211	6.68642	5.09221	3.87847	2.89678	0	26.5673	16.5712	89.9937	74.6259	46.979	30.3359	4.70112	-13.8133	-43.2585	-53.3513	0	0	0	0	0	0	0	179.351	114.085	115.042
					10.3892	85.4276	99.0047	84.9377	72.6622	61.0812	50.9017	42.1295	34.6087	28.2342	22.8157	18.2351	14.388	11.2729	8.71446	6.69048	5.12786	3.8722	2.90743	0	26.5324	16.4315	89.7923	74.5319	47.0083	30.3446	4.69619	-13.7942	-43.324	-53.4382	0	0	0	0	0	0	0	178.781	113.72	114.677
					10.41	85.18	99.1099	85.4625	72.6878	61.0655	50.8544	42.0831	34.6224	28.2337	22.7756	18.2153	14.3201	11.2578	8.67759	6.67694	5.09473	3.88009	2.90139	0	26.5606	16.533	89.8239	74.5127	46.9647	30.3112	4.69805	-13.794	-43.2478	-53.3802	0	0	0	0	0	0	0	178.982	113.849	114.806
					10.4309	84.9301	99.0352	85.4236	72.6665	61.0335	50.756	42.1043	34.6005	28.2686	22.8341	18.2806	14.3915	11.2657	8.68299	6.67853	5.11508	3.86895	2.90585	0	26.5405	16.5255	89.7977	74.4736	46.8738	30.3265	4.69508	-13.811	-43.3589	-53.5718	0	0	0	0	0	0	0	178.491	113.534	114.491
					10.4517	84.678	99.0618	85.5005	72.6738	61.1479	50.8464	42.1537	34.6449	28.2921	22.7614	18.2596	14.3544	11.2911	8.71482	6.67791	5.10191	3.88831	2.91085	0	26.5477	16.5403	89.8066	74.6132	46.9572	30.3621	4.70111	-13.8225	-43.2209	-53.5101	0	0	0	0	0	0	0	178.975	113.844	114.801
					10.4725	84.4236	99.0321	85.5639	72.7959	61.1772	50.9724	42.2096	34.742	28.3798	22.8612	18.2697	14.3633	11.288	8.72814	6.70302	5.12911	3.88503	2.92336	0	26.5397	16.5526	89.9576	74.649	47.0736	30.4023	4.71428	-13.8654	-43.4105	-53.5398	0	0	0	0	0	0	0	179.073	113.907	114.864
					10.4934	84.1671	99.1279	85.4428	72.6778	61.1186	50.868	42.1912	34.6997	28.3809	22.8866	18.256	14.3536	11.2762	8.69617	6.68906	5.12216	3.89354	2.91448	0	26.5654	16.5292	89.8115	74.5775	46.9772	30.3891	4.70854	-13.8659	-43.4586	-53.4996	0	0	0	0	0	0	0	178.734	113.69	114.647
					10.5142	83.9083	99.1319	85.7315	72.8406	61.2347	51.0812	42.3019	34.8428	28.5302	23.0106	18.4188	14.5998	11.4334	8.84153	6.80885	5.21521	3.94831	2.96609	0	26.5665	16.585	90.0127	74.7192	47.1741	30.4688	4.72796	-13.9388	-43.6941	-53.9766	0	0	0	0	0	0	0	178.645	113.633	114.59
					10.535	83.6475	99.247	85.5659	72.9029	61.259	51.1023	42.4351	34.9519	28.5415	23.0652	18.4838	14.6324	11.4612	8.87131	6.82879	5.22174	3.96581	2.98143	0	26.5973	16.553	90.0898	74.7488	47.1936	30.5647	4.74277	-13.9443	-43.7979	-54.1672	0	0	0	0	0	0	0	178.581	113.592	114.549
					10.5559	83.3845	99.216	85.7688	72.972	61.3624	51.2256	42.5241	35.0631	28.6708	23.2179	18.6438	14.8106	11.5748	8.97046	6.90664	5.30837	4.02807	3.04142	0	26.589	16.5922	90.1751	74.8751	47.3074	30.6288	4.75786	-14.0075	-44.0878	-54.6361	0	0	0	0	0	0	0	178.194	113.344	114.301
					10.5767	83.1195	99.2872	85.8204	73.0404	61.5007	51.2687	42.5598	35.0998	28.7522	23.2797	18.7072	14.9399	11.6522	9.05335	6.97949	5.32955	4.01659	3.06995	0	26.6081	16.6022	90.2596	75.0438	47.3473	30.6545	4.76284	-14.0473	-44.2052	-54.8219	0	0	0	0	0	0	0	178.204	113.351	114.308
					10.5975	82.8523	99.2408	85.799	73.0314	61.4903	51.3042	42.5927	35.157	28.7777	23.2964	18.7156	14.9156	11.6542	9.0487	7.02015	5.34682	4.04403	3.04937	0	26.5956	16.5981	90.2485	75.0311	47.3801	30.6782	4.7706	-14.0597	-44.2368	-54.8465	0	0	0	0	0	0	0	178.159	113.322	114.279
					10.6184	82.5832	99.287	85.7449	73.0414	61.4838	51.3946	42.7108	35.1848	28.8034	23.2744	18.7066	14.9109	11.6287	9.04534	6.96238	5.32981	4.03045	3.04029	0	26.608	16.5876	90.2609	75.0232	47.4635	30.7633	4.77437	-14.0723	-44.195	-54.8201	0	0	0	0	0	0	0	178.393	113.472	114.429
					10.6392	82.3122	99.2549	85.811	73.0372	61.5078	51.3422	42.6335	35.1292	28.7992	23.3167	18.701	14.8436	11.6274	9.00683	6.93683	5.29311	4.01764	3.01768	0	26.5994	16.6004	90.2558	75.0524	47.4151	30.7076	4.76682	-14.0703	-44.2754	-54.8036	0	0	0	0	0	0	0	178.248	113.379	114.336
					10.66	82.0392	99.3004	85.88	73.0177	61.448	51.3601	42.6248	35.1873	28.7809	23.2888	18.6901	14.7836	11.591	8.9666	6.91064	5.27566	4.00884	2.99234	0	26.6116	16.6137	90.2316	74.9795	47.4317	30.7014	4.77471	-14.0613	-44.2223	-54.7718	0	0	0	0	0	0	0	178.289	113.405	114.362
					10.6809	81.7643	99.5226	86.0443	73.255	61.7129	51.5784	42.774	35.2467	28.9123	23.3574	18.7155	14.8064	11.6231	8.98542	6.88698	5.25926	4.00124	3.0016	0	26.6712	16.6455	90.5249	75.3027	47.6332	30.8088	4.78277	-14.1255	-44.3526	-54.8463	0	0	0	0	0	0	0	179.045	113.889	114.846
					10.7017	81.4876	99.2787	85.841	73.1452	61.6541	51.4391	42.6803	35.2251	28.8558	23.3638	18.7619	14.8336	11.633	8.99264	6.89532	5.27839	3.99759	2.99785	0	26.6058	16.6062	90.3892	75.2309	47.5046	30.7413	4.77984	-14.0979	-44.3648	-54.9822	0	0	0	0	0	0	0	178.413	113.484	114.442
					10.7225	81.2091	99.5304	86.0864	73.2963	61.7536	51.6115	42.9008	35.4131	28.9777	23.4747	18.8405	14.8995	11.7096	9.04958	6.94538	5.28723	4.01794	3.00346	0	26.6733	16.6537	90.5759	75.3524	47.6639	30.9002	4.80534	-14.1575	-44.5754	-55.2124	0	0	0	0	0	0	0	178.679	113.655	114.612
					10.7434	80.9287	99.622	86.1596	73.395	61.8552	51.724	42.9567	35.5106	29.0804	23.5693	18.9077	14.9504	11.7455	9.03181	6.9531	5.31602	4.00272	3.01182	0	26.6978	16.6678	90.6979	75.4763	47.7677	30.9404	4.81857	-14.2076	-44.7551	-55.4093	0	0	0	0	0	0	0	178.694	113.665	114.622
					10.7642	80.6466	99.4867	85.9399	73.2552	61.9123	51.8364	43.0645	35.5689	29.1631	23.559	18.9196	14.9561	11.742	9.08157	6.96964	5.3271	4.03699	3.02474	0	26.6615	16.6253	90.5251	75.546	47.8715	31.0181	4.82648	-14.248	-44.7355	-55.4443	0	0	0	0	0	0	0	178.646	113.634	114.591
					10.785	80.3627	99.5372	86.0636	73.41	61.9021	51.7878	43.095	35.6268	29.2025	23.6209	18.9548	15.0129	11.7819	9.0938	6.99387	5.35218	4.06579	3.03747	0	26.6751	16.6493	90.7163	75.5335	47.8266	31.04	4.83435	-14.2673	-44.8531	-55.5474	0	0	0	0	0	0	0	178.608	113.609	114.566
					10.8059	80.0772	99.6362	86.2323	73.6641	62.0601	51.9426	43.183	35.693	29.2956	23.721	19.076	15.174	11.9055	9.22107	7.0765	5.42269	4.10013	3.05512	0	26.7016	16.6819	91.0304	75.7264	47.9696	31.1034	4.84332	-14.3128	-45.0431	-55.9026	0	0	0	0	0	0	0	178.798	113.731	114.688
					10.8267	79.7899	99.623	86.3759	73.7143	62.2525	52.1804	43.3778	35.8548	29.4393	23.8957	19.2266	15.3082	11.9932	9.29242	7.1577	5.47621	4.13944	3.11422	0	26.6981	16.7097	91.0924	75.9611	48.1892	31.2437	4.86528	-14.383	-45.3748	-56.3438	0	0	0	0	0	0	0	178.658	113.641	114.598
					10.8475	79.5011	99.6102	86.2136	73.5556	62.1731	52.079	43.3726	35.8576	29.4867	23.9044	19.2018	15.2216	11.9439	9.22511	7.07627	5.41515	4.09676	3.07487	0	26.6946	16.6783	90.8963	75.8643	48.0956	31.24	4.86567	-14.4062	-45.3913	-56.2711	0	0	0	0	0	0	0	178.266	113.39	114.348
					10.8684	79.2106	99.6069	86.2553	73.8154	62.3359	52.1922	43.4272	35.9698	29.5042	23.929	19.2507	15.2375	11.9855	9.25059	7.10709	5.42771	4.09788	3.05875	0	26.6938	16.6864	91.2174	76.0629	48.2001	31.2793	4.88089	-14.4147	-45.438	-56.4147	0	0	0	0	0	0	0	178.753	113.702	114.659
					10.8892	78.9186	99.7329	86.6051	73.8087	62.4566	52.32	43.5836	36.0663	29.5986	24.0357	19.3044	15.2957	12.0232	9.277	7.12453	5.44367	4.11129	3.07916	0	26.7275	16.754	91.2091	76.2102	48.3182	31.392	4.89398	-14.4608	-45.6407	-56.5721	0	0	0	0	0	0	0	178.831	113.752	114.709
					10.91	78.625	99.6765	86.3815	73.768	62.5125	52.3612	43.6716	36.1593	29.7275	24.1224	19.4056	15.3835	12.0748	9.34528	7.17613	5.47998	4.14005	3.10833	0	26.7124	16.7108	91.1588	76.2784	48.3562	31.4553	4.9066	-14.5238	-45.8053	-56.8685	0	0	0	0	0	0	0	178.381	113.464	114.421
					10.9309	78.33	99.847	86.6941	73.9827	62.7153	52.6001	43.8408	36.3226	29.8116	24.2068	19.4659	15.4205	12.0787	9.35937	7.19622	5.49576	4.16245	3.10418	0	26.7581	16.7712	91.4241	76.5258	48.5768	31.5772	4.92876	-14.5649	-45.9657	-57.0452	0	0	0	0	0	0	0	178.986	113.851	114.808
[truncated: 32 more columns]

## Sheet: Clone A-7 (Validation set)
CLONE A-7			toff	VCCoff	t	VCC	FG_Perm_1 pF/cm	FG_Perm_2 pF/cm	FG_Perm_3 pF/cm	FG_Perm_4 pF/cm	FG_Perm_5 pF/cm	FG_Perm_6 pF/cm	FG_Perm_7 pF/cm	FG_Perm_8 pF/cm	FG_Perm_9 pF/cm	FG_Perm_10 pF/cm	FG_Perm_11 pF/cm	FG_Perm_12 pF/cm	FG_Perm_13 pF/cm	FG_Perm_14 pF/cm	FG_Perm_15 pF/cm	FG_Perm_16 pF/cm	FG_Perm_17 pF/cm	Intercept	FQ1	FQ2	FQ3	FQ4	FQ5	FQ6	FQ7	FQ8	FQ9	FQ10	FQ11	FQ12	FQ13	FQ14	FQ15	FQ16	FQ17	premodel1	premodel2	Clone B model	Yoffset1 (d1)	Yoffset2 (d2)	k at beginning	set this factor	RMSE (VCC) PLS
			0	7.237	0.00583333	7.28285	4.535	4.023	3.412	2.841	2.273	1.793	1.367	1.025	0.76165	0.550286	0.392119	0.295353	0.219117	0.163352	0.127406	0.0993454	0.074707	0	1.21534	0.778261	4.21638	3.46662	2.09914	1.29144	0.185494	-0.500778	-1.44627	-1.61262	0	0	0	0	0	0	0	9.693	4.80668	7.42314	-2.41015	2.61646	0.66	0.996598	13.1044
			0.91875	16.513	0.0266667	7.44816	4.623	4.059	3.477	2.925	2.383	1.876	1.453	1.099	0.83258	0.610908	0.460412	0.352415	0.274344	0.215182	0.164023	0.128052	0.114258	0	1.23892	0.785226	4.2967	3.56911	2.20073	1.35123	0.197163	-0.536932	-1.58096	-1.79028	0	0	0	0	0	0	0	9.73091	4.8317	7.44816
			1.92222	31.376	0.0475116	7.61603	4.607	4.074	3.562	2.978	2.442	1.955	1.521	1.158	0.887676	0.671045	0.532348	0.395775	0.310555	0.251446	0.198995	0.157145	0.129883	0	1.23463	0.788128	4.40174	3.63379	2.25522	1.40813	0.206391	-0.565757	-1.68558	-1.96651	0	0	0	0	0	0	0	9.71017	4.81801	7.43447
			2.9125	52.298	0.0683449	7.78623	4.631	4.141	3.592	3.017	2.475	1.976	1.525	1.164	0.88568	0.657198	0.50259	0.373606	0.287241	0.225937	0.178732	0.139019	0.11084	0	1.24107	0.801089	4.43881	3.68137	2.28569	1.42325	0.206933	-0.568688	-1.68179	-1.92593	0	0	0	0	0	0	0	9.90181	4.94449	7.56095
			3.96736	82.587	0.0891782	7.95884	4.709	4.187	3.63	3.071	2.506	1.995	1.553	1.178	0.874417	0.652694	0.48788	0.359184	0.261101	0.202879	0.158826	0.125055	0.0927734	0	1.26197	0.809988	4.48577	3.74726	2.31432	1.43694	0.210733	-0.575528	-1.6604	-1.91273	0	0	0	0	0	0	0	10.1183	5.08739	7.70385
			4.975	130.728	0.110012	8.13382	4.781	4.228	3.706	3.155	2.568	2.035	1.603	1.22	0.917606	0.682475	0.519497	0.390273	0.287826	0.229868	0.17817	0.136738	0.109375	0	1.28126	0.817919	4.57969	3.84976	2.37158	1.46575	0.217517	-0.596048	-1.74241	-2.00001	0	0	0	0	0	0	0	10.245	5.17101	7.78747
			5.92708	144.286	0.130845	8.31117	4.855	4.32	3.777	3.181	2.598	2.08	1.612	1.233	0.922739	0.68708	0.500909	0.38031	0.283046	0.215134	0.165169	0.123575	0.0927734	0	1.3011	0.835717	4.66743	3.88149	2.39928	1.49816	0.218739	-0.602399	-1.75216	-2.0135	0	0	0	0	0	0	0	10.4339	5.29564	7.9121
			6.90625	143.118	0.151678	8.49084	4.931	4.398	3.814	3.213	2.636	2.095	1.627	1.245	0.937329	0.692346	0.507853	0.381238	0.268133	0.202316	0.16724	0.127942	0.0966797	0	1.32146	0.850806	4.71315	3.92053	2.43438	1.50897	0.220774	-0.608262	-1.77986	-2.02894	0	0	0	0	0	0	0	10.553	5.37428	7.99075
			7.90625	137.072	0.172512	8.67283	5.001	4.5	3.866	3.27	2.684	2.124	1.636	1.258	0.941585	0.700623	0.5209	0.393348	0.294511	0.221432	0.173876	0.125578	0.106934	0	1.34022	0.870539	4.77741	3.99009	2.47871	1.52985	0.221995	-0.614614	-1.78795	-2.05319	0	0	0	0	0	0	0	10.7531	5.50632	8.12278
			8.90625	126.926	0.193345	8.8571	5.064	4.539	3.929	3.307	2.691	2.16	1.672	1.287	0.956305	0.718989	0.551859	0.410273	0.313258	0.243526	0.193094	0.149914	0.112305	0	1.35711	0.878083	4.85526	4.03523	2.48517	1.55578	0.22688	-0.628782	-1.8159	-2.10701	0	0	0	0	0	0	0	10.8418	5.56491	8.18137
			9.89444	122.345	0.214178	9.04363	5.161	4.607	3.974	3.365	2.739	2.18	1.689	1.29	0.976187	0.724533	0.561399	0.419061	0.322153	0.249252	0.199788	0.151278	0.116699	0	1.3831	0.891238	4.91087	4.10601	2.5295	1.57019	0.229187	-0.630248	-1.85365	-2.12326	0	0	0	0	0	0	0	11.0129	5.67783	8.29429
			10.9278	105.489	0.235012	9.2324	5.269	4.667	4.045	3.398	2.763	2.175	1.679	1.268	0.944033	0.705984	0.523853	0.37792	0.282874	0.203144	0.158137	0.108044	0.0825195	0	1.41204	0.902845	4.99861	4.14627	2.55166	1.56659	0.22783	-0.619499	-1.7926	-2.0689	0	0	0	0	0	0	0	11.3249	5.8837	8.50017
			11.9583	87.075	0.255845	9.42337	5.363	4.768	4.112	3.434	2.774	2.189	1.686	1.27	0.933081	0.700238	0.511951	0.373869	0.292796	0.213194	0.172413	0.131369	0.101074	0	1.43724	0.922384	5.0814	4.1902	2.56182	1.57667	0.22878	-0.620476	-1.7718	-2.05206	0	0	0	0	0	0	0	11.5542	6.03504	8.65151
			12.9146	74.891	0.276678	9.61654	5.483	4.869	4.185	3.49	2.837	2.226	1.713	1.301	0.97168	0.699382	0.523462	0.381163	0.288848	0.227631	0.172704	0.140172	0.10791	0	1.46939	0.941923	5.17161	4.25853	2.62	1.60332	0.232444	-0.635622	-1.84509	-2.04955	0	0	0	0	0	0	0	11.767	6.17549	8.79195
			13.8701	61.928	0.297512	9.81187	5.567	4.95	4.263	3.541	2.867	2.262	1.726	1.29	0.960438	0.699554	0.500677	0.376833	0.246838	0.210462	0.1513	0.125474	0.0878906	0	1.49191	0.957592	5.268	4.32076	2.64771	1.62925	0.234208	-0.630248	-1.82375	-2.05006	0	0	0	0	0	0	0	12.0454	6.35925	8.97571
					0.318345	10.0093	5.674	5.022	4.326	3.611	2.916	2.294	1.749	1.309	0.967967	0.710663	0.476547	0.375024	0.280478	0.209549	0.163297	0.13162	0.0639648	0	1.52058	0.971521	5.34585	4.40618	2.69296	1.6523	0.237329	-0.63953	-1.83804	-2.08261	0	0	0	0	0	0	0	12.2665	6.50521	9.12167
					0.339178	10.2089	5.783	5.154	4.401	3.661	2.957	2.268	1.756	1.335	0.976511	0.712546	0.497561	0.371577	0.258696	0.194668	0.144628	0.113777	0.0810547	0	1.54979	0.997057	5.43854	4.46719	2.73082	1.63357	0.238279	-0.652233	-1.85427	-2.08813	0	0	0	0	0	0	0	12.4606	6.63331	9.24977
					0.360012	10.4106	5.918	5.242	4.499	3.734	3.01	2.346	1.798	1.345	0.988674	0.715535	0.496863	0.385586	0.274331	0.20349	0.155134	0.127801	0.0922852	0	1.58597	1.01408	5.55964	4.55626	2.77977	1.68975	0.243978	-0.657119	-1.87736	-2.09689	0	0	0	0	0	0	0	12.7981	6.85603	9.47249
					0.380845	10.6143	5.989	5.294	4.589	3.812	3.062	2.417	1.847	1.389	1.019	0.752618	0.534653	0.40396	0.298659	0.227469	0.171307	0.140029	0.107422	0	1.605	1.02414	5.67086	4.65144	2.82779	1.74089	0.250627	-0.678615	-1.93495	-2.20556	0	0	0	0	0	0	0	12.9516	6.95737	9.57383
					0.401678	10.8201	6.095	5.421	4.682	3.877	3.079	2.458	1.874	1.401	1.012	0.734678	0.526725	0.389176	0.290071	0.221811	0.171987	0.137978	0.103027	0	1.63341	1.04871	5.78578	4.73075	2.84349	1.77042	0.254291	-0.684478	-1.92166	-2.15299	0	0	0	0	0	0	0	13.3077	7.1924	9.80886
					0.422512	11.0279	6.244	5.505	4.756	3.979	3.183	2.493	1.897	1.414	1.036	0.765568	0.50903	0.373989	0.271887	0.176492	0.105336	0.132738	0.105469	0	1.67334	1.06496	5.87723	4.85522	2.93954	1.79563	0.257412	-0.690829	-1.96723	-2.24351	0	0	0	0	0	0	0	13.5617	7.36005	9.97651
					0.443345	11.2377	6.361	5.629	4.866	4.002	3.236	2.471	1.927	1.439	1.045	0.764784	0.530873	0.402307	0.288542	0.219668	0.162882	0.127095	0.0961914	0	1.70469	1.08895	6.01316	4.88328	2.98848	1.77979	0.261482	-0.703044	-1.98432	-2.24121	0	0	0	0	0	0	0	13.7913	7.51153	10.128
					0.464178	11.4495	6.478	5.745	4.91	4.11	3.28	2.557	1.958	1.465	1.057	0.769819	0.534024	0.406985	0.291159	0.218905	0.164658	0.128334	0.0878906	0	1.73605	1.11139	6.06753	5.01506	3.02912	1.84173	0.265689	-0.715746	-2.00711	-2.25597	0	0	0	0	0	0	0	14.0877	7.70721	10.3237
					0.485012	11.6632	6.645	5.896	5.054	4.2	3.387	2.633	2.006	1.5	1.106	0.805657	0.555285	0.430093	0.313766	0.170277	0.181446	0.14959	0.111328	0	1.7808	1.1406	6.24548	5.12488	3.12794	1.89647	0.272202	-0.732846	-2.10015	-2.361	0	0	0	0	0	0	0	14.3944	7.90959	10.526
					0.505845	11.8788	6.778	5.994	5.124	4.235	3.409	2.687	2.027	1.492	1.091	0.778579	0.520537	0.403444	0.303232	0.219965	0.172683	0.13149	0.0981445	0	1.81644	1.15956	6.33198	5.16759	3.14825	1.93537	0.275052	-0.728937	-2.07167	-2.28164	0	0	0	0	0	0	0	14.752	8.14562	10.7621
					0.526678	12.0964	6.87	6.04	5.208	4.291	3.455	2.711	2.032	1.529	1.103	0.801073	0.548942	0.432975	0.304584	0.225337	0.16533	0.132238	0.0869141	0	1.8411	1.16846	6.43579	5.23592	3.19073	1.95265	0.27573	-0.747014	-2.09445	-2.34756	0	0	0	0	0	0	0	14.9113	8.25079	10.8672
					0.547512	12.3158	6.995	6.179	5.284	4.398	3.506	2.723	2.05	1.543	1.121	0.797	0.531806	0.411162	0.294394	0.21801	0.164655	0.113083	0.0732422	0	1.8746	1.19535	6.5297	5.36648	3.23783	1.9613	0.278173	-0.753854	-2.12863	-2.33563	0	0	0	0	0	0	0	15.2253	8.45801	11.0745
					0.568345	12.5371	7.149	6.304	5.386	4.458	3.551	2.78	2.08	1.556	1.104	0.807045	0.56142	0.42973	0.306508	0.216004	0.167847	0.131455	0.101074	0	1.91587	1.21953	6.65575	5.4397	3.27939	2.00235	0.282244	-0.760206	-2.09635	-2.36506	0	0	0	0	0	0	0	15.5732	8.68762	11.3041
					0.589178	12.7601	7.304	6.412	5.518	4.542	3.652	2.829	2.164	1.607	1.154	0.851545	0.586701	0.447531	0.3387	0.247329	0.164312	0.137035	0.0859375	0	1.95741	1.24042	6.81887	5.54219	3.37267	2.03764	0.293642	-0.785122	-2.1913	-2.49547	0	0	0	0	0	0	0	15.791	8.83133	11.4478
					0.610012	12.985	7.376	6.537	5.591	4.596	3.688	2.885	2.173	1.623	1.174	0.830322	0.573371	0.444767	0.319257	0.229919	0.15339	0.144501	0.105957	0	1.9767	1.2646	6.90908	5.60809	3.40591	2.07798	0.294863	-0.792939	-2.22927	-2.43328	0	0	0	0	0	0	0	16.0817	9.02324	11.6397
					0.630845	13.2117	7.548	6.626	5.703	4.705	3.753	2.935	2.174	1.64	1.189	0.865754	0.588788	0.457861	0.313574	0.193272	0.147861	0.134647	0.104004	0	2.0228	1.28182	7.04748	5.74109	3.46594	2.11399	0.294999	-0.801245	-2.25776	-2.53711	0	0	0	0	0	0	0	16.372	9.21482	11.8313
					0.651678	13.4401	7.694	6.756	5.792	4.812	3.819	2.995	2.203	1.654	1.174	0.884595	0.607386	0.465417	0.329866	0.209364	0.179279	0.149095	0.104492	0	2.06192	1.30697	7.15746	5.87165	3.52689	2.15721	0.298934	-0.808085	-2.22927	-2.59232	0	0	0	0	0	0	0	16.7514	9.4652	12.0817
					0.672523	13.6704	7.789	6.891	5.828	4.873	3.883	3.018	2.284	1.699	1.183	0.854194	0.585318	0.4707	0.333409	0.203426	0.179726	0.154531	0.0878906	0	2.08738	1.33308	7.20195	5.94608	3.586	2.17377	0.309925	-0.83007	-2.24636	-2.50323	0	0	0	0	0	0	0	17.0585	9.66793	12.2844
					0.693345	13.9021	7.941	7.013	5.974	4.96	3.946	3.068	2.305	1.724	1.239	0.907757	0.61219	0.481496	0.343712	0.137701	0.200687	0.147026	0.115234	0	2.12812	1.35669	7.38237	6.05224	3.64418	2.20979	0.312775	-0.842284	-2.3527	-2.6602	0	0	0	0	0	0	0	17.231	9.78174	12.3982
					0.71419	14.1358	8.032	7.115	6.082	5.015	4.008	3.12	2.356	1.761	1.211	0.92097	0.611268	0.485149	0.329387	0.266469	0.184691	0.124772	0.119629	0	2.1525	1.37642	7.51583	6.11935	3.70144	2.24724	0.319695	-0.860361	-2.29953	-2.69892	0	0	0	0	0	0	0	17.5737	10.0079	12.6244
					0.735023	14.3709	8.139	7.227	6.16	5.113	4.07	3.172	2.341	1.769	1.297	0.948208	0.634739	0.476395	0.346093	0.268982	0.187025	0.165464	0.104492	0	2.18118	1.39808	7.61222	6.23893	3.75869	2.2847	0.31766	-0.86427	-2.46283	-2.77874	0	0	0	0	0	0	0	17.6856	10.0818	12.6983
					0.755856	14.6078	8.353	7.315	6.286	5.211	4.139	3.224	2.442	1.825	1.33	0.972089	0.663694	0.519819	0.3743	0.278167	0.215956	0.167626	0.125977	0	2.23853	1.41511	7.76792	6.35851	3.82242	2.32215	0.331365	-0.891629	-2.5255	-2.84873	0	0	0	0	0	0	0	17.9902	10.2828	12.8993
					0.77669	14.8462	8.335	7.465	6.357	5.266	4.204	3.267	2.47	1.83	1.331	0.957506	0.643501	0.492838	0.353161	0.251158	0.201322	0.16132	0.0874023	0	2.2337	1.44413	7.85566	6.42563	3.88244	2.35312	0.335164	-0.894072	-2.5274	-2.80599	0	0	0	0	0	0	0	18.3024	10.4889	13.1053
					0.797523	15.0862	8.578	7.538	6.463	5.341	4.246	3.293	2.488	1.861	1.371	0.992455	0.674775	0.522548	0.380518	0.284305	0.220164	0.178064	0.128906	0	2.29883	1.45825	7.98665	6.51714	3.92123	2.37185	0.337607	-0.909218	-2.60335	-2.90841	0	0	0	0	0	0	0	18.4706	10.5999	13.2163
					0.818356	15.3278	8.708	7.68	6.537	5.43	4.342	3.346	2.552	1.903	1.389	1.009	0.680089	0.534349	0.373092	0.220682	0.211771	0.156679	0.131836	0	2.33367	1.48572	8.0781	6.62574	4.00989	2.41002	0.346291	-0.929737	-2.63753	-2.95689	0	0	0	0	0	0	0	18.7653	10.7944	13.4108
					0.83919	15.5709	8.757	7.771	6.639	5.478	4.393	3.408	2.593	1.919	1.405	1.023	0.695594	0.543117	0.389865	0.281645	0.214584	0.169898	0.117188	0	2.3468	1.50332	8.20414	6.68431	4.05699	2.45468	0.351855	-0.937554	-2.66791	-2.99792	0	0	0	0	0	0	0	18.9987	10.9484	13.5649
					0.860023	15.8155	8.903	7.864	6.712	5.545	4.448	3.465	2.621	1.861	1.43	1.045	0.718639	0.553589	0.400056	0.28836	0.230556	0.180782	0.133789	0	2.38592	1.52131	8.29435	6.76606	4.10778	2.49574	0.355654	-0.909218	-2.71538	-3.06239	0	0	0	0	0	0	0	19.2398	11.1076	13.724
					0.880856	16.0616	9.029	7.94	6.829	5.65	4.519	3.521	2.667	1.984	1.446	1.066	0.739266	0.570974	0.410724	0.306457	0.222131	0.19468	0.141602	0	2.41969	1.53602	8.43894	6.89419	4.17335	2.53607	0.361896	-0.969311	-2.74577	-3.12393	0	0	0	0	0	0	0	19.5211	11.2932	13.9097
					0.90169	16.3092	9.141	8.072	6.932	5.707	4.579	3.567	2.703	2.02	1.466	1.072	0.761793	0.538178	0.413606	0.314169	0.2477	0.188237	0.15918	0	2.44971	1.56155	8.56622	6.96374	4.22876	2.5692	0.366781	-0.986899	-2.78374	-3.14152	0	0	0	0	0	0	0	19.7938	11.4732	14.0897
					0.922523	16.5582	9.252	8.191	7.02	5.806	4.601	3.635	2.757	2.067	1.484	1.13	0.827801	0.618378	0.468072	0.360198	0.293411	0.22116	0.165039	0	2.47945	1.58457	8.67496	7.08454	4.24908	2.61818	0.374108	-1.00986	-2.81792	-3.31149	0	0	0	0	0	0	0	19.9256	11.5602	14.1767
					0.943356	16.8095	9.315	8.321	7.129	5.932	4.719	3.724	2.838	2.128	1.582	1.164	0.8471	0.6477	0.448579	0.287519	0.286863	0.231973	0.177734	0	2.49634	1.60972	8.80966	7.23829	4.35805	2.68229	0.3851	-1.03966	-3.00401	-3.41113	0	0	0	0	0	0	0	20.1246	11.6916	14.308
					0.96419	17.0634	9.541	8.414	7.226	6.029	4.819	3.799	2.921	2.188	1.656	1.232	0.923773	0.708308	0.520642	0.421976	0.333125	0.270422	0.219727	0	2.5569	1.62771	8.92953	7.35665	4.4504	2.73631	0.396362	-1.06898	-3.14453	-3.6104	0	0	0	0	0	0	0	20.23	11.7611	14.3775
					0.985023	17.3199	9.658	8.5	7.327	6.08	4.888	3.83	2.914	2.2	1.643	1.227	0.908751	0.685517	0.515448	0.412787	0.330598	0.267001	0.205078	0	2.58826	1.64435	9.05434	7.41888	4.51413	2.75863	0.395412	-1.07484	-3.11984	-3.59575	0	0	0	0	0	0	0	20.5836	11.9945	14.6109
					1.00586	17.5791	9.693	8.64	7.422	6.164	4.991	3.906	2.986	2.278	1.701	1.28	0.972416	0.730187	0.570287	0.45275	0.361599	0.285211	0.225586	0	2.59764	1.67143	9.17174	7.52137	4.60925	2.81337	0.405182	-1.11295	-3.22998	-3.75107	0	0	0	0	0	0	0	20.696	12.0687	14.6851
					1.02669	17.8408	9.857	8.696	7.503	6.267	5.046	3.959	3.024	2.283	1.727	1.323	1.012	0.759091	0.538097	0.461869	0.384009	0.306228	0.251953	0	2.64159	1.68227	9.27183	7.64706	4.66004	2.85155	0.410339	-1.11539	-3.27935	-3.87708	0	0	0	0	0	0	0	20.8929	12.1986	14.815
					1.04752	18.1051	9.963	8.874	7.585	6.296	5.092	3.969	3.064	2.316	1.735	1.299	0.970698	0.747569	0.576672	0.45733	0.361376	0.283922	0.238281	0	2.66999	1.7167	9.37316	7.68244	4.70252	2.85875	0.415766	-1.13151	-3.29454	-3.80675	0	0	0	0	0	0	0	21.1865	12.3924	15.0089
					1.06836	18.372	10.071	9.021	7.702	6.378	5.139	4.026	3.085	2.343	1.736	1.301	0.966051	0.738334	0.567697	0.449545	0.353987	0.287477	0.231445	0	2.69894	1.74514	9.51775	7.7825	4.74593	2.89981	0.418616	-1.14471	-3.29644	-3.81261	0	0	0	0	0	0	0	21.5549	12.6355	15.252
					1.08919	18.6415	10.297	9.083	7.799	6.489	5.188	4.115	3.112	2.368	1.765	1.288	0.958736	0.741444	0.552736	0.446207	0.356736	0.262509	0.236328	0	2.7595	1.75713	9.63761	7.91794	4.79118	2.96391	0.42228	-1.15692	-3.35151	-3.77451	0	0	0	0	0	0	0	21.9666	12.9073	15.5237
					1.11002	18.9135	10.438	9.273	7.939	6.592	5.284	4.186	3.187	2.396	1.791	1.342	0.983806	0.757547	0.577662	0.455772	0.354311	0.297078	0.240234	0	2.79729	1.79389	9.81062	8.04362	4.87984	3.01505	0.432457	-1.1706	-3.40088	-3.93276	0	0	0	0	0	0	0	22.2685	13.1065	15.723
					1.13086	19.1881	10.588	9.436	8.022	6.689	5.396	4.193	3.229	2.426	1.809	1.341	0.982429	0.764953	0.576719	0.453573	0.365283	0.298565	0.239258	0	2.83749	1.82542	9.91319	8.16198	4.98327	3.02009	0.438156	-1.18526	-3.43506	-3.92983	0	0	0	0	0	0	0	22.6295	13.3447	15.9612
					1.15169	19.4652	10.744	9.467	8.139	6.793	5.451	4.302	3.273	2.473	1.85	1.374	1.009	0.780175	0.59154	0.450938	0.366959	0.29873	0.236328	0	2.8793	1.83142	10.0578	8.28889	5.03406	3.0986	0.444126	-1.20822	-3.51291	-4.02653	0	0	0	0	0	0	0	22.8865	13.5144	16.1308
					1.17252	19.7448	10.921	9.686	8.264	6.918	5.572	4.345	3.357	2.528	1.88	1.406	1.034	0.790664	0.586514	0.471259	0.372823	0.306934	0.248047	0	2.92673	1.87379	10.2122	8.44141	5.14581	3.12957	0.455525	-1.23509	-3.56988	-4.12031	0	0	0	0	0	0	0	23.2598	13.7608	16.3772
					1.19336	20.0269	11.063	9.853	8.399	7.026	5.626	4.452	3.395	2.57	1.919	1.444	1.062	0.81018	0.593916	0.398086	0.389952	0.326992	0.257812	0	2.96478	1.90609	10.3791	8.5732	5.19568	3.20664	0.460681	-1.25561	-3.64393	-4.23167	0	0	0	0	0	0	0	23.5549	13.9555	16.572
					1.21419	20.3114	11.213	9.952	8.623	7.105	5.747	4.495	3.449	2.609	1.931	1.46	1.056	0.815464	0.614694	0.498339	0.399398	0.323846	0.261719	0	3.00498	1.92524	10.6559	8.66959	5.30742	3.23761	0.468009	-1.27466	-3.66672	-4.27856	0	0	0	0	0	0	0	24.0488	14.2815	16.898
					1.23502	20.5985	11.432	10.087	8.735	7.242	5.819	4.569	3.517	2.662	1.96	1.46	1.063	0.847777	0.650825	0.509506	0.415445	0.336489	0.273438	0	3.06367	1.95136	10.7943	8.83676	5.37392	3.29091	0.477236	-1.30056	-3.72179	-4.27856	0	0	0	0	0	0	0	24.4872	14.5709	17.1873
					1.25586	20.888	11.59	10.269	8.83	7.368	5.935	4.638	3.57	2.691	2.015	1.504	1.126	0.873811	0.665771	0.529947	0.41592	0.34773	0.279297	0	3.10602	1.98657	10.9117	8.99051	5.48104	3.34061	0.484428	-1.31473	-3.82622	-4.4075	0	0	0	0	0	0	0	24.7524	14.7459	17.3623
					1.27669	21.18	11.733	10.399	8.969	7.45	6.015	4.729	3.635	2.749	2.037	1.521	1.106	0.837905	0.646628	0.465672	0.415593	0.337827	0.265625	0	3.14434	2.01172	11.0834	9.09056	5.55492	3.40616	0.493248	-1.34306	-3.868	-4.45732	0	0	0	0	0	0	0	25.116	14.9859	17.6023
					1.29752	21.4745	11.886	10.591	9.093	7.574	6.12	4.812	3.605	2.722	2.026	1.5	1.136	0.877667	0.666082	0.5251	0.42244	0.347672	0.279297	0	3.18534	2.04886	11.2367	9.24187	5.65189	3.46594	0.489177	-1.32987	-3.84711	-4.39578	0	0	0	0	0	0	0	25.747	15.4023	18.0188
					1.31837	21.7715	12.11	10.736	9.247	7.68	6.18	4.872	3.733	2.804	2.077	1.553	1.135	0.887949	0.669299	0.513228	0.422003	0.3436	0.265625	0	3.24537	2.07691	11.427	9.37121	5.7073	3.50916	0.506546	-1.36993	-3.94395	-4.5511	0	0	0	0	0	0	0	25.9785	15.5551	18.1716
					1.3392	22.0707	12.27	10.896	9.379	7.827	6.283	4.955	3.773	2.85	2.141	1.586	1.173	0.909999	0.683685	0.540836	0.431569	0.349371	0.277344	0	3.28825	2.10786	11.5901	9.55058	5.80243	3.56894	0.511973	-1.39241	-4.06548	-4.6478	0	0	0	0	0	0	0	26.3144	15.7768	18.3933
					1.36003	22.3724	12.442	11.109	9.498	7.926	6.427	5.041	3.885	2.93	2.195	1.629	1.18	0.919067	0.691619	0.557772	0.445933	0.364879	0.263672	0	3.33434	2.14907	11.7372	9.67138	5.93541	3.63088	0.527171	-1.43149	-4.16802	-4.77382	0	0	0	0	0	0	0	26.6121	15.9733	18.5897
					1.38087	22.6765	12.667	11.238	9.629	8.112	6.493	5.118	3.892	2.981	2.148	1.665	1.237	0.951224	0.723448	0.569154	0.45567	0.368682	0.292969	0	3.39464	2.17402	11.899	9.89834	5.99636	3.68634	0.528121	-1.45641	-4.07877	-4.87932	0	0	0	0	0	0	0	27.1624	16.3365	18.9529
					1.4017	22.9829	12.853	11.367	9.81	8.157	6.602	5.208	3.994	3.021	2.258	1.683	1.242	0.954557	0.725591	0.56308	0.447898	0.36664	0.292969	0	3.44449	2.19898	12.1227	9.95325	6.09703	3.75117	0.541962	-1.47595	-4.28765	-4.93207	0	0	0	0	0	0	0	27.4139	16.5025	19.1189
					1.42253	23.2917	12.979	11.516	9.988	8.288	6.713	5.201	4.05	3.065	2.31	1.718	1.257	0.967131	0.7296	0.566622	0.463037	0.379222	0.306641	0	3.47826	2.2278	12.3427	10.1131	6.19954	3.74612	0.549561	-1.49745	-4.38639	-5.03463	0	0	0	0	0	0	0	27.7386	16.7168	19.3332
					1.44337	23.6029	13.233	11.716	10.102	8.366	6.694	5.351	4.105	3.094	2.326	1.716	1.236	0.962025	0.722939	0.561338	0.412985	0.358966	0.25	0	3.54632	2.2665	12.4835	10.2083	6.18199	3.85416	0.557024	-1.51162	-4.41677	-5.02877	0	0	0	0	0	0	0	28.1407	16.9821	19.5986
					1.4642	23.9164	13.409	11.925	10.244	8.502	6.937	5.417	4.169	3.147	2.346	1.75	1.249	0.976443	0.73031	0.563848	0.44327	0.357393	0.277344	0	3.59349	2.30693	12.659	10.3742	6.4064	3.9017	0.565708	-1.53751	-4.45475	-5.12841	0	0	0	0	0	0	0	28.6868	17.3426	19.9591
					1.48503	24.2323	13.58	12.082	10.429	8.685	6.975	5.53	4.213	3.173	2.38	1.767	1.281	0.992302	0.748901	0.574788	0.461558	0.378942	0.300781	0	3.63932	2.3373	12.8876	10.5975	6.4415	3.98309	0.571679	-1.55021	-4.51931	-5.17823	0	0	0	0	0	0	0	29.2103	17.6881	20.3046
					1.50587	24.5504	13.752	12.289	10.503	8.773	7.027	5.538	4.227	3.256	2.432	1.789	1.296	1.015	0.762735	0.570816	0.463287	0.381804	0.298828	0	3.68541	2.37734	12.9791	10.7049	6.48952	3.98886	0.573579	-1.59076	-4.61805	-5.2427	0	0	0	0	0	0	0	29.3472	17.7784	20.3949
					1.5267	24.8709	13.982	12.435	10.672	8.884	7.226	5.717	4.355	3.3	2.469	1.825	1.302	1.029	0.773202	0.60208	0.487592	0.391076	0.302734	0	3.74705	2.40559	13.1879	10.8403	6.6733	4.11778	0.590947	-1.61226	-4.68831	-5.3482	0	0	0	0	0	0	0	29.9142	18.1526	20.7691
					1.54753	25.1936	14.215	12.619	10.874	9.027	7.336	5.781	4.409	3.36	2.506	1.858	1.367	1.052	0.791497	0.611603	0.481329	0.38424	0.308594	0	3.80949	2.44118	13.4375	11.0148	6.77488	4.16388	0.598275	-1.64158	-4.75857	-5.44491	0	0	0	0	0	0	0	30.395	18.47	21.0865
					1.56837	25.5187	14.423	12.791	11.022	9.209	7.468	5.861	4.526	3.41	2.547	1.911	1.403	1.076	0.816499	0.640491	0.500153	0.419051	0.333984	0	3.86523	2.47446	13.6204	11.2369	6.89679	4.2215	0.614151	-1.666	-4.83642	-5.60022	0	0	0	0	0	0	0	30.8268	18.755	21.3715
					1.5892	25.846	14.575	13.028	11.227	9.365	7.549	5.952	4.583	3.448	2.564	1.916	1.416	1.099	0.830162	0.644842	0.516845	0.423444	0.332031	0	3.90597	2.52031	13.8738	11.4273	6.97159	4.28705	0.621886	-1.68457	-4.8687	-5.61488	0	0	0	0	0	0	0	31.4397	19.1595	21.776
					1.61003	26.1755	14.799	13.162	11.332	9.459	7.679	6.017	4.653	3.513	2.621	1.95	1.433	1.105	0.835189	0.647641	0.517619	0.418755	0.328125	0	3.966	2.54623	14.0035	11.542	7.09165	4.33386	0.631384	-1.71633	-4.97694	-5.71451	0	0	0	0	0	0	0	31.7068	19.3358	21.9523
					1.63087	26.5073	15.076	13.418	11.548	9.615	7.757	6.155	4.69	3.583	2.672	2.007	1.484	1.138	0.862547	0.673924	0.547518	0.442668	0.351562	0	4.04023	2.59575	14.2704	11.7323	7.16368	4.43326	0.636405	-1.75052	-5.07378	-5.88155	0	0	0	0	0	0	0	32.1662	19.639	22.2555
					1.6517	26.8414	15.258	13.582	11.695	9.764	7.893	6.195	4.764	3.616	2.706	2.03	1.488	1.154	0.867885	0.676367	0.54294	0.424668	0.349609	0	4.08901	2.62748	14.4521	11.9141	7.28928	4.46207	0.646446	-1.76665	-5.13834	-5.94896	0	0	0	0	0	0	0	32.6266	19.9428	22.5593
					1.67253	27.1776	15.465	13.699	11.839	9.86	7.965	6.304	4.822	3.669	2.749	2.035	1.519	1.168	0.875403	0.687937	0.551872	0.439511	0.349609	0	4.14448	2.65011	14.63	12.0313	7.35577	4.54058	0.654316	-1.79254	-5.21999	-5.96361	0	0	0	0	0	0	0	33.0304	20.2094	22.8258
					1.69337	27.5161	15.695	13.962	12.026	10.041	8.113	6.358	4.902	3.719	2.752	2.064	1.511	1.17	0.878524	0.687797	0.547107	0.442746	0.34375	0	4.20612	2.70099	14.8611	12.2521	7.49245	4.57948	0.665172	-1.81697	-5.22569	-6.04859	0	0	0	0	0	0	0	33.6662	20.629	23.2455
					1.7142	27.8568	15.974	14.129	12.227	10.186	8.171	6.43	4.962	3.746	2.782	2.085	1.531	1.179	0.867798	0.687652	0.55134	0.408763	0.339844	0	4.28089	2.7333	15.1095	12.4291	7.54602	4.63134	0.673314	-1.83016	-5.28266	-6.11013	0	0	0	0	0	0	0	34.1805	20.9684	23.5849
					1.73503	28.1996	16.224	14.334	12.355	10.305	8.298	6.52	4.973	3.787	2.798	2.083	1.531	1.175	0.892954	0.692987	0.555244	0.437096	0.330078	0	4.34789	2.77296	15.2677	12.5743	7.6633	4.69616	0.674806	-1.85019	-5.31304	-6.10427	0	0	0	0	0	0	0	34.7296	21.3308	23.9473
					1.75587	28.5446	16.465	14.533	12.502	10.485	8.384	6.651	5.078	3.853	2.872	2.122	1.511	1.19	0.879239	0.676012	0.554027	0.447396	0.353516	0	4.41247	2.81145	15.4493	12.7939	7.74272	4.79052	0.689054	-1.88244	-5.45355	-6.21856	0	0	0	0	0	0	0	35.1349	21.5983	24.2148
					1.7767	28.8918	16.591	14.742	12.646	10.596	8.514	6.719	5.172	3.893	2.853	2.15	1.578	1.215	0.906606	0.67699	0.556874	0.456798	0.349609	0	4.44624	2.85188	15.6273	12.9293	7.86278	4.83949	0.701809	-1.90198	-5.41748	-6.30062	0	0	0	0	0	0	0	35.6388	21.9309	24.5473
					1.79753	29.2411	16.84	14.895	12.826	10.726	8.641	6.83	5.242	3.942	2.949	2.183	1.587	1.241	0.936204	0.724926	0.574033	0.464633	0.367188	0	4.51297	2.88148	15.8497	13.088	7.98007	4.91944	0.711308	-1.92592	-5.59977	-6.39733	0	0	0	0	0	0	0	36.02	22.1825	24.7989
					1.81837	29.5926	17.023	15.126	13.035	10.824	8.761	6.937	5.295	4.028	2.99	2.237	1.653	1.273	0.961531	0.751709	0.598059	0.485549	0.384766	0	4.56201	2.92617	16.108	13.2076	8.09089	4.99651	0.7185	-1.96794	-5.67762	-6.55557	0	0	0	0	0	0	0	36.4085	22.4389	25.0554
					1.8392	29.9462	17.339	15.372	13.18	10.949	8.919	6.969	5.404	4.043	3.016	2.259	1.653	1.262	0.956081	0.740797	0.592127	0.4831	0.375	0	4.6467	2.97376	16.2872	13.3601	8.2368	5.01956	0.73329	-1.97526	-5.72699	-6.62004	0	0	0	0	0	0	0	36.9351	22.7864	25.4029
					1.86003	30.3018	17.537	15.545	13.323	11.18	8.983	7.094	5.429	4.107	3.072	2.296	1.667	1.297	0.976214	0.755987	0.602385	0.486423	0.384766	0	4.69976	3.00723	16.4639	13.6419	8.29591	5.1096	0.736683	-2.00653	-5.83333	-6.72847	0	0	0	0	0	0	0	37.3867	23.0845	25.701
					1.88087	30.6596	17.702	15.73	13.524	11.254	9.063	7.202	5.527	4.185	3.116	2.332	1.707	1.313	0.999809	0.775847	0.613351	0.497462	0.398438	0	4.74398	3.04302	16.7123	13.7322	8.36979	5.18738	0.749981	-2.04464	-5.91688	-6.83397	0	0	0	0	0	0	0	37.7432	23.3198	25.9363
					1.9017	31.0195	17.984	15.895	13.722	11.412	9.225	7.27	5.565	4.235	3.146	2.321	1.717	1.33	0.985046	0.78518	0.62742	0.499423	0.386719	0	4.81955	3.07494	16.957	13.925	8.5194	5.23636	0.755137	-2.06907	-5.97385	-6.80174	0	0	0	0	0	0	0	38.4427	23.7815	26.398
					1.92253	31.3814	18.241	16.097	13.815	11.603	9.346	7.348	5.674	4.251	3.203	2.399	1.727	1.351	1.023	0.799853	0.631105	0.504293	0.398438	0	4.88842	3.11401	17.0719	14.1581	8.63114	5.29254	0.769928	-2.07689	-6.08208	-7.03032	0	0	0	0	0	0	0	38.7368	23.9756	26.592
					1.94337	31.7463	18.463	16.374	14.039	11.727	9.499	7.463	5.736	4.361	3.235	2.449	1.806	1.396	1.06	0.813367	0.647855	0.515803	0.40625	0	4.94792	3.1676	17.3487	14.3094	8.77244	5.37538	0.778341	-2.13063	-6.14284	-7.17684	0	0	0	0	0	0	0	39.2495	24.3139	26.9304
					1.96421	32.115	18.505	16.548	14.191	11.922	9.565	7.607	5.862	4.463	3.355	2.529	1.905	1.455	1.123	0.882929	0.713753	0.567641	0.462891	0	4.95917	3.20126	17.5365	14.5473	8.83339	5.47909	0.795438	-2.18046	-6.37071	-7.41129	0	0	0	0	0	0	0	39.3898	24.4065	27.023
					1.98505	32.4872	18.835	16.629	14.435	11.997	9.747	7.68	5.921	4.519	3.399	2.559	1.944	1.469	1.154	0.903998	0.722258	0.574425	0.457031	0	5.04761	3.21693	17.8381	14.6389	9.00147	5.53167	0.803444	-2.20782	-6.45426	-7.4992	0	0	0	0	0	0	0	39.9168	24.7544	27.3708
					2.00588	32.863	19.035	16.905	14.606	12.14	9.826	7.752	6.004	4.569	3.427	2.537	1.893	1.446	1.106	0.867619	0.665128	0.561335	0.441406	0	5.10121	3.27032	18.0494	14.8133	9.07443	5.58353	0.814707	-2.23225	-6.50743	-7.43473	0	0	0	0	0	0	0	40.5325	25.1608	27.7772
					2.02671	33.2424	19.348	17.108	14.74	12.261	9.996	7.827	6.052	4.585	3.442	2.593	1.937	1.483	1.133	0.891336	0.710786	0.566501	0.458984	0	5.18509	3.30959	18.215	14.961	9.23143	5.63755	0.82122	-2.24007	-6.53591	-7.59884	0	0	0	0	0	0	0	40.986	25.4601	28.0765
					2.04755	33.6254	19.382	17.271	14.843	12.404	10.045	7.862	6.037	4.581	3.443	2.569	1.926	1.477	1.12	0.869423	0.685665	0.514826	0.380859	0	5.1942	3.34113	18.3422	15.1355	9.27668	5.66276	0.819185	-2.23811	-6.53781	-7.52851	0	0	0	0	0	0	0	41.4672	25.7777	28.3941
					2.06838	34.0119	19.635	17.557	15.052	12.543	10.137	8.036	6.169	4.712	3.518	2.65	1.945	1.497	1.154	0.907676	0.726351	0.578592	0.466797	0	5.262	3.39645	18.6005	15.3051	9.36164	5.78809	0.837096	-2.30211	-6.68022	-7.76588	0	0	0	0	0	0	0	41.8027	25.9991	28.6155
					2.08921	34.4019	20.094	17.646	15.279	12.721	10.305	8.076	6.255	4.78	3.561	2.667	1.999	1.528	1.16	0.917143	0.691209	0.577572	0.445312	0	5.38501	3.41367	18.881	15.5223	9.51679	5.8169	0.848766	-2.33534	-6.76188	-7.8157	0	0	0	0	0	0	0	42.4715	26.4405	29.057
					2.11005	34.7954	20.338	17.941	15.437	12.848	10.396	8.211	6.324	4.791	3.582	2.701	1.996	1.533	1.179	0.902689	0.713498	0.577974	0.462891	0	5.4504	3.47074	19.0763	15.6773	9.60083	5.91414	0.858129	-2.34071	-6.80175	-7.91533	0	0	0	0	0	0	0	42.99	26.7827	29.3991
					2.13088	35.1924	20.408	18.248	15.608	13.047	10.514	8.314	6.425	4.858	3.654	2.688	2.019	1.541	1.2	0.939138	0.749281	0.598976	0.480469	0	5.46916	3.53013	19.2876	15.9201	9.70981	5.98832	0.871834	-2.37344	-6.93847	-7.87724	0	0	0	0	0	0	0	43.5878	27.1772	29.7937
					2.15171	35.5927	20.757	18.41	15.816	13.249	10.679	8.41	6.486	4.929	3.694	2.768	2.075	1.583	1.212	0.956679	0.759785	0.610247	0.488281	0	5.56269	3.56147	19.5446	16.1666	9.86218	6.05747	0.880111	-2.40813	-7.01443	-8.11168	0	0	0	0	0	0	0	44.1009	27.5159	30.1323
					2.17255	35.9965	20.878	18.648	16.106	13.317	10.832	8.509	6.569	4.986	3.74	2.799	2.1	1.594	1.233	0.96406	0.717878	0.587166	0.490234	0	5.59512	3.60751	19.903	16.2495	10.0035	6.12878	0.891374	-2.43598	-7.10177	-8.20253	0	0	0	0	0	0	0	44.6385	27.8707	30.4872
					2.19338	36.4036	21.263	18.983	16.175	13.484	10.919	8.588	6.654	5.029	3.754	2.819	2.096	1.593	1.222	0.95001	0.761174	0.611937	0.484375	0	5.69829	3.67232	19.9883	16.4533	10.0838	6.18568	0.902908	-2.45699	-7.12836	-8.26114	0	0	0	0	0	0	0	45.1381	28.2005	30.8169
					2.21421	36.8141	21.504	19.175	16.39	13.711	11.095	8.736	6.673	5.092	3.81	2.848	2.135	1.633	1.247	0.983611	0.788319	0.621767	0.503906	0	5.76288	3.70946	20.2539	16.7303	10.2464	6.29228	0.905486	-2.48777	-7.23469	-8.34612	0	0	0	0	0	0	0	45.8321	28.6585	31.275
					2.23505	37.2278	21.835	19.274	16.735	13.851	11.22	8.829	6.831	5.162	3.877	2.913	2.176	1.667	1.275	1	0.795688	0.628724	0.5	0	5.85158	3.72861	20.6803	16.9011	10.3618	6.35926	0.926926	-2.52197	-7.36192	-8.5366	0	0	0	0	0	0	0	46.3891	29.0261	31.6426
					2.25588	37.6448	22.225	19.601	16.758	14.124	11.335	8.998	6.901	5.227	3.928	2.946	2.199	1.684	1.287	0.991543	0.796271	0.59628	0.46875	0	5.9561	3.79187	20.7087	17.2342	10.468	6.48099	0.936424	-2.55372	-7.45876	-8.63331	0	0	0	0	0	0	0	46.9305	29.3835	31.9999
					2.27671	38.0651	22.48	19.788	17.073	14.203	11.507	9.122	6.992	5.282	3.956	2.955	2.242	1.706	1.309	1.026	0.81048	0.647646	0.515625	0	6.02444	3.82805	21.098	17.3306	10.6269	6.5703	0.948772	-2.5806	-7.51193	-8.65969	0	0	0	0	0	0	0	47.6748	29.8747	32.4911
					2.29755	38.4886	22.723	20.045	17.321	14.408	11.636	9.22	7.093	5.372	4.023	3.015	2.263	1.73	1.328	1.042	0.829665	0.663006	0.527344	0	6.08956	3.87777	21.4044	17.5808	10.746	6.64089	0.962478	-2.62457	-7.63915	-8.83552	0	0	0	0	0	0	0	48.2027	30.223	32.8395
					2.31838	38.9152	22.876	20.398	17.562	14.622	11.808	9.281	7.183	5.432	4.046	3.026	2.251	1.739	1.326	1.039	0.83535	0.666864	0.53125	0	6.13056	3.94605	21.7022	17.8419	10.9048	6.68483	0.97469	-2.65388	-7.68283	-8.86775	0	0	0	0	0	0	0	48.9807	30.7365	33.353
					2.33921	39.3451	23.325	20.607	17.654	14.759	11.975	9.376	7.281	5.495	4.11	3.081	2.296	1.759	1.341	1.041	0.830187	0.655236	0.515625	0	6.25089	3.98649	21.8159	18.0091	11.0591	6.75325	0.987988	-2.68466	-7.80436	-9.02893	0	0	0	0	0	0	0	49.3447	30.9768	33.5933
					2.36005	39.778	23.62	20.837	17.937	14.965	12.095	9.549	7.325	5.541	4.137	3.092	2.291	1.753	1.334	1.061	0.836613	0.67049	0.507812	0	6.32995	4.03098	22.1656	18.2604	11.1699	6.87786	0.993959	-2.70713	-7.85563	-9.06117	0	0	0	0	0	0	0	50.2048	31.5445	34.1609
					2.38088	40.2141	23.9	21.182	18.162	15.165	12.219	9.565	7.371	5.605	4.214	3.152	2.336	1.79	1.373	1.061	0.804464	0.648892	0.535156	0	6.40498	4.09772	22.4437	18.5045	11.2844	6.88938	1.0002	-2.7384	-8.00184	-9.237	0	0	0	0	0	0	0	50.6476	31.8367	34.4532
					2.40171	40.6532	24.196	21.392	18.423	15.325	12.415	9.706	7.472	5.694	4.267	3.182	2.348	1.793	1.38	1.073	0.855196	0.670853	0.519531	0	6.48431	4.13835	22.7662	18.6997	11.4654	6.99094	1.01391	-2.78188	-8.10248	-9.32491	0	0	0	0	0	0	0	51.3496	32.3	34.9165
					2.42255	41.0953	24.592	21.632	18.648	15.541	12.548	9.858	7.591	5.721	4.342	3.224	2.397	1.839	1.395	1.095	0.871463	0.690489	0.542969	0	6.59043	4.18478	23.0443	18.9633	11.5882	7.10042	1.03005	-2.79507	-8.24489	-9.448	0	0	0	0	0	0	0	52.0135	32.7382	35.3547
					2.44338	41.5405	24.978	21.994	18.853	15.679	12.68	10	7.586	5.809	4.32	3.255	2.42	1.839	1.411	1.095	0.87321	0.688867	0.542969	0	6.69388	4.25481	23.2976	19.1317	11.7101	7.2027	1.02937	-2.83807	-8.20312	-9.53884	0	0	0	0	0	0	0	52.7401	33.2178	35.8342
					2.46421	41.9886	25.25	22.208	19.122	15.875	12.78	10.091	7.775	5.866	4.396	3.283	2.436	1.864	1.429	1.102	0.880713	0.701417	0.527344	0	6.76677	4.2962	23.63	19.3708	11.8025	7.26824	1.05502	-2.86592	-8.34743	-9.6209	0	0	0	0	0	0	0	53.3553	33.6238	36.2403
					2.48505	42.4397	25.576	22.621	19.359	16.004	13.044	10.242	7.827	5.934	4.408	3.314	2.449	1.865	1.424	1.094	0.870106	0.693008	0.554688	0	6.85414	4.3761	23.9229	19.5282	12.0463	7.37701	1.06208	-2.89914	-8.37022	-9.71174	0	0	0	0	0	0	0	54.1856	34.1718	36.7883
					2.50588	42.8937	25.854	22.83	19.538	16.344	13.115	10.276	7.925	5.985	4.494	3.329	2.471	1.888	1.406	1.109	0.883242	0.713175	0.5625	0	6.92864	4.41653	24.1441	19.9431	12.1119	7.40149	1.07537	-2.92406	-8.53352	-9.7557	0	0	0	0	0	0	0	54.8078	34.5825	37.1989
					2.52671	43.3506	26.144	23.205	19.757	16.617	13.283	10.473	8.034	6.087	4.51	3.389	2.509	1.914	1.388	1.143	0.903499	0.717202	0.566406	0	7.00636	4.48908	24.4147	20.2762	12.267	7.54339	1.09017	-2.97389	-8.5639	-9.93153	0	0	0	0	0	0	0	55.6176	35.1169	37.7334
					2.54755	43.8104	26.562	23.478	20.092	16.726	13.495	10.523	8.143	6.171	4.602	3.468	2.562	1.924	1.476	1.147	0.913698	0.733266	0.554688	0	7.11838	4.54189	24.8287	20.4092	12.4628	7.5794	1.10496	-3.01493	-8.7386	-10.163	0	0	0	0	0	0	0	56.1288	35.4543	38.0707
					2.56838	44.273	26.878	23.798	20.269	16.965	13.626	10.77	8.258	6.266	4.672	3.492	2.603	1.995	1.523	1.185	0.942383	0.753561	0.597656	0	7.20306	4.60379	25.0474	20.7009	12.5838	7.75731	1.12056	-3.06134	-8.87152	-10.2334	0	0	0	0	0	0	0	56.8505	35.9307	38.5471
					2.58922	44.7387	27.146	24.122	20.512	17.13	13.873	10.857	8.337	6.321	4.716	3.538	2.641	2.01	1.541	1.202	0.949399	0.753171	0.597656	0	7.27488	4.66647	25.3477	20.9022	12.8119	7.81997	1.13128	-3.08821	-8.95507	-10.3682	0	0	0	0	0	0	0	57.5429	36.3876	39.0041
					2.61006	45.2069	27.58	24.345	20.821	17.324	13.981	11	8.412	6.376	4.783	3.583	2.685	2.045	1.554	1.213	0.966722	0.764302	0.5625	0	7.39119	4.70961	25.7296	21.1389	12.9116	7.92297	1.14146	-3.11508	-9.0823	-10.5001	0	0	0	0	0	0	0	58.2479	36.8529	39.4694
					2.63089	45.6778	27.893	24.738	21.061	17.62	14.071	11.18	8.401	6.483	4.849	3.627	2.717	2.07	1.563	1.232	0.936159	0.780716	0.617188	0	7.47507	4.78564	26.0261	21.5001	12.9947	8.05262	1.13997	-3.16736	-9.20762	-10.629	0	0	0	0	0	0	0	58.9703	37.3297	39.9461
					2.65172	46.1514	28.343	24.893	21.408	17.827	14.343	11.306	8.64	6.552	4.881	3.663	2.739	2.106	1.56	1.245	0.982793	0.78199	0.625	0	7.59567	4.81563	26.4549	21.7527	13.2459	8.14337	1.1724	-3.20107	-9.26838	-10.7345	0	0	0	0	0	0	0	59.9767	37.9939	40.6104
					2.67256	46.6278	28.656	25.289	21.748	17.901	14.509	11.41	8.717	6.623	4.956	3.712	2.754	2.111	1.618	1.266	0.993791	0.798381	0.628906	0	7.67955	4.89223	26.8751	21.843	13.3992	8.21828	1.18284	-3.23576	-9.4108	-10.8781	0	0	0	0	0	0	0	60.5656	38.3826	40.999
					2.69339	47.1068	29.081	25.569	21.985	18.152	14.734	11.549	8.874	6.641	5.011	3.765	2.759	2.049	1.642	1.281	0.997038	0.787562	0.601562	0	7.79345	4.9464	27.168	22.1493	13.607	8.3184	1.20415	-3.24455	-9.51524	-11.0334	0	0	0	0	0	0	0	61.3934	38.929	41.5454
					2.71422	47.5884	29.278	25.922	22.174	18.442	14.839	11.68	8.92	6.741	5.018	3.77	2.782	2.138	1.639	1.272	1.001	0.795676	0.59375	0	7.84624	5.01469	27.4015	22.5031	13.704	8.41275	1.21039	-3.29341	-9.52853	-11.0481	0	0	0	0	0	0	0	62.2227	39.4763	42.0927
					2.73506	48.0726	29.738	26.204	22.402	18.735	15.061	11.757	9.117	6.867	5.103	3.836	2.837	2.17	1.648	1.274	1.016	0.819309	0.640625	0	7.96952	5.06924	27.6833	22.8606	13.909	8.46821	1.23712	-3.35497	-9.68993	-11.2415	0	0	0	0	0	0	0	62.9106	39.9303	42.5468
					2.75589	48.5594	30.191	26.615	22.638	18.913	15.196	11.976	9.166	6.918	5.172	3.858	2.862	2.193	1.667	1.299	1.029	0.811604	0.628906	0	8.09092	5.14875	27.9749	23.0778	14.0337	8.62595	1.24377	-3.37989	-9.82096	-11.3059	0	0	0	0	0	0	0	63.689	40.4441	43.0605
					2.77672	49.0487	30.553	26.898	23.123	19.076	15.408	12.088	9.296	7.031	5.239	3.914	2.92	2.222	1.703	1.29	1.015	0.798219	0.625	0	8.18793	5.2035	28.5742	23.2767	14.2295	8.70662	1.26141	-3.43509	-9.94818	-11.4701	0	0	0	0	0	0	0	64.5866	41.0364	43.6529
					2.79756	49.5406	30.852	27.164	23.332	19.294	15.599	12.197	9.38	7.11	5.306	3.95	2.935	2.231	1.711	1.339	1.059	0.805257	0.671875	0	8.26806	5.25496	28.8325	23.5427	14.4059	8.78513	1.27281	-3.47369	-10.0754	-11.5756	0	0	0	0	0	0	0	65.2374	41.466	44.0825
					2.81839	50.0349	31.176	27.564	23.575	19.555	15.756	12.384	9.513	7.198	5.399	3.997	2.978	2.268	1.732	1.347	1.059	0.850658	0.671875	0	8.35489	5.33234	29.1328	23.8612	14.5509	8.91982	1.29086	-3.51668	-10.252	-11.7133	0	0	0	0	0	0	0	65.9608	41.9434	44.5599
					2.83922	50.5317	31.647	27.988	23.686	19.79	15.954	12.544	9.598	7.225	5.416	4.042	3.009	2.307	1.762	1.369	1.089	0.859884	0.667969	0	8.48111	5.41436	29.27	24.148	14.7337	9.03507	1.30239	-3.52987	-10.2843	-11.8452	0	0	0	0	0	0	0	66.7253	42.448	45.0644
					2.86006	51.0309	32.21	28.136	24.112	19.891	16.221	12.655	9.688	7.366	5.483	4.1	3.051	2.314	1.759	1.369	1.089	0.861433	0.679688	0	8.63199	5.44299	29.7964	24.2712	14.9803	9.11502	1.3146	-3.59876	-10.4115	-12.0151	0	0	0	0	0	0	0	67.5271	42.9772	45.5936
					2.88089	51.5325	32.45	28.584	24.414	20.317	16.35	12.77	9.864	7.407	5.546	4.151	3.083	2.371	1.787	1.376	1.108	0.861812	0.679688	0	8.69631	5.52966	30.1696	24.791	15.0994	9.19785	1.33849	-3.61879	-10.5311	-12.1646	0	0	0	0	0	0	0	68.5078	43.6245	46.2409
					2.90172	52.0364	32.881	28.877	24.788	20.521	16.563	12.945	9.973	7.491	5.59	4.155	3.053	2.327	1.787	1.401	1.113	0.880151	0.691406	0	8.81181	5.58634	30.6318	25.0399	15.2961	9.3239	1.35328	-3.65983	-10.6147	-12.1763	0	0	0	0	0	0	0	69.5923	44.3402	46.9567
					2.92256	52.5426	33.019	29.3	25.019	20.828	16.739	13.122	10.011	7.623	5.65	4.242	3.171	2.404	1.817	1.375	1.088	0.876989	0.691406	0	8.84879	5.66817	30.9172	25.4145	15.4587	9.45138	1.35843	-3.72432	-10.7286	-12.4313	0	0	0	0	0	0	0	70.233	44.7631	47.3795
					2.94339	53.0503	33.732	29.554	25.373	20.929	16.951	13.304	10.173	7.626	5.78	4.258	3.202	2.418	1.838	1.358	1.101	0.853363	0.6875	0	9.03987	5.71731	31.3547	25.5378	15.6545	9.58247	1.38042	-3.72579	-10.9755	-12.4782	0	0	0	0	0	0	0	71.0876	45.3271	47.9436
					2.96422	53.5595	34.129	29.886	25.59	21.239	17.074	13.454	10.369	7.787	5.906	4.401	3.269	2.489	1.892	1.492	1.164	0.934378	0.738281	0	9.14626	5.78154	31.6228	25.916	15.768	9.69051	1.40701	-3.80445	-11.2147	-12.8972	0	0	0	0	0	0	0	71.4159	45.5438	48.1602
					2.98506	54.0704	34.369	30.312	25.921	21.504	17.461	13.671	10.471	7.948	5.961	4.467	3.369	2.568	1.974	1.534	1.078	0.856075	0.75	0	9.21058	5.86395	32.0319	26.2394	16.1254	9.84681	1.42085	-3.88311	-11.3192	-13.0906	0	0	0	0	0	0	0	72.446	46.2237	48.8401
					3.00589	54.5831	34.805	30.746	26.202	21.647	17.609	13.798	10.585	8.033	6.018	4.471	3.356	2.548	1.965	1.516	1.188	0.890616	0.734375	0	9.32743	5.94791	32.3791	26.4139	16.2621	9.93829	1.43632	-3.92463	-11.4274	-13.1024	0	0	0	0	0	0	0	73.2507	46.7547	49.3712
					3.02672	55.0976	35.465	31.105	26.53	22.006	17.866	13.93	10.66	8.082	6.073	4.555	3.402	2.589	1.962	1.534	1.214	0.934884	0.761719	0	9.5043	6.01736	32.7844	26.8519	16.4995	10.0334	1.4465	-3.94857	-11.5318	-13.3485	0	0	0	0	0	0	0	74.3084	47.4529	50.0693
					3.04756	55.6143	35.507	31.492	26.802	22.319	17.909	14.119	10.802	8.185	6.104	4.585	3.416	2.609	1.989	1.555	1.222	0.969668	0.773438	0	9.51556	6.09222	33.1206	27.2339	16.5392	10.1695	1.46577	-3.9989	-11.5907	-13.4364	0	0	0	0	0	0	0	75.1106	47.9823	50.5988
					3.06839	56.1331	36.006	31.774	27.154	22.604	18.093	14.24	10.931	8.239	6.184	4.616	3.457	2.618	2.004	1.582	1.213	0.976605	0.773438	0	9.64928	6.14678	33.5556	27.5816	16.7091	10.2566	1.48327	-4.02528	-11.7426	-13.5273	0	0	0	0	0	0	0	76.0871	48.6268	51.2432
					3.08922	56.6543	36.613	32.151	27.391	22.82	18.363	14.318	11.005	8.375	6.194	4.681	3.471	2.663	2.038	1.592	1.254	0.962791	0.773438	0	9.81195	6.21971	33.8484	27.8452	16.9585	10.3128	1.49331	-4.09172	-11.7616	-13.7178	0	0	0	0	0	0	0	76.9188	49.1757	51.7922
					3.11006	57.178	36.784	32.521	27.786	23.039	18.607	14.542	11.181	8.421	6.309	4.695	3.529	2.658	2.033	1.594	1.259	1.005	0.785156	0	9.85778	6.29129	34.3365	28.1124	17.1838	10.4742	1.51719	-4.1142	-11.98	-13.7588	0	0	0	0	0	0	0	77.9202	49.8366	52.4531
					3.13089	57.7043	37.339	32.933	28.018	23.35	18.632	14.706	11.269	8.523	6.345	4.771	3.549	2.696	2.073	1.585	1.268	0.995606	0.785156	0	10.0065	6.37099	34.6232	28.4919	17.2069	10.5923	1.52914	-4.16403	-12.0483	-13.9815	0	0	0	0	0	0	0	78.6271	50.3032	52.9196
					3.15172	58.2333	37.991	33.057	28.416	23.523	18.85	14.849	11.385	8.667	6.455	4.795	3.621	2.717	2.073	1.629	1.268	1.021	0.800781	0	10.1812	6.39498	35.1151	28.703	17.4082	10.6953	1.54488	-4.23438	-12.2572	-14.0518	0	0	0	0	0	0	0	79.4992	50.8788	53.4952
					3.17256	58.7652	38.115	33.624	28.657	23.769	19.141	15.038	11.442	8.712	6.5	4.791	3.626	2.779	2.11	1.623	1.298	0.991876	0.800781	0	10.2145	6.50466	35.4129	29.0032	17.6769	10.8314	1.55261	-4.25637	-12.3427	-14.0401	0	0	0	0	0	0	0	80.557	51.5769	54.1934
					3.19339	59.3002	38.544	34.133	29.074	24.091	19.322	15.175	11.609	8.803	6.57	4.934	3.675	2.807	2.148	1.672	1.323	1.046	0.816406	0	10.3294	6.60313	35.9282	29.3961	17.8441	10.9301	1.57527	-4.30083	-12.4756	-14.4592	0	0	0	0	0	0	0	81.3707	52.114	54.7304
					3.21422	59.8383	39.163	34.263	29.488	24.353	19.621	15.33	11.78	8.903	6.636	4.951	3.697	2.825	2.155	1.663	1.315	1.037	0.800781	0	10.4953	6.62828	36.4398	29.7158	18.1202	11.0417	1.59848	-4.34969	-12.6009	-14.509	0	0	0	0	0	0	0	82.58	52.9121	55.5286
					3.23507	60.38	39.517	34.778	29.664	24.533	19.799	15.457	11.927	8.943	6.743	5.027	3.735	2.861	2.194	1.699	1.307	1.042	0.800781	0	10.5902	6.72791	36.6573	29.9354	18.2846	11.1332	1.61842	-4.36923	-12.8041	-14.7317	0	0	0	0	0	0	0	83.042	53.217	55.8335
					3.2559	60.9249	40.206	35.231	29.973	24.858	19.968	15.649	12.006	9.065	6.758	5.079	3.783	2.889	2.199	1.688	1.346	1.074	0.839844	0	10.7748	6.81554	37.0391	30.332	18.4407	11.2715	1.62914	-4.42883	-12.8326	-14.8841	0	0	0	0	0	0	0	84.1573	53.9531	56.5696
					3.27674	61.4733	40.591	35.508	30.408	25.129	20.153	15.813	12.149	9.153	6.819	5.108	3.766	2.845	2.145	1.649	1.3	1.037	0.816406	0	10.878	6.86913	37.5767	30.6627	18.6115	11.3896	1.64855	-4.47183	-12.9484	-14.9691	0	0	0	0	0	0	0	85.2469	54.6722	57.2887
					3.29757	62.0254	41.228	35.886	30.66	25.402	20.422	15.961	12.203	9.216	6.896	5.15	3.841	2.899	2.212	1.68	1.338	1.072	0.851562	0	11.0487	6.94225	37.8881	30.9958	18.86	11.4962	1.65587	-4.50261	-13.0946	-15.0922	0	0	0	0	0	0	0	86.1975	55.2997	57.9161
					3.3184	62.5814	41.403	36.407	31.036	25.75	20.577	16.228	12.436	9.343	7.018	5.223	3.916	2.973	2.267	1.771	1.378	1.09	0.851562	0	11.0956	7.04304	38.3527	31.4204	19.0031	11.6885	1.68749	-4.56465	-13.3263	-15.3061	0	0	0	0	0	0	0	87.0939	55.8913	58.5078
					3.33924	63.1414	41.794	36.755	31.446	25.985	20.836	16.29	12.545	9.478	7.074	5.308	3.951	3.013	2.294	1.768	1.398	1.108	0.859375	0	11.2004	7.11037	38.8594	31.7072	19.2423	11.7332	1.70228	-4.63061	-13.4326	-15.5552	0	0	0	0	0	0	0	87.9367	56.4475	59.064
					3.36007	63.7055	42.473	37.107	31.674	26.176	21.113	16.436	12.63	9.601	7.141	5.336	3.964	3.026	2.301	1.787	1.37	1.076	0.84375	0	11.3824	7.17846	39.1411	31.9402	19.4981	11.8384	1.71382	-4.6907	-13.5598	-15.6373	0	0	0	0	0	0	0	88.8047	57.0204	59.6369
					3.3809	64.2738	42.887	37.572	32.244	26.452	21.316	16.684	12.757	9.629	7.182	5.32	3.949	3.01	2.307	1.799	1.418	1.108	0.863281	0	11.4933	7.26842	39.8455	32.277	19.6856	12.017	1.73105	-4.70438	-13.6377	-15.5904	0	0	0	0	0	0	0	90.3854	58.0637	60.6802
					3.40174	64.8466	43.289	38.167	32.391	26.801	21.605	16.857	12.879	9.763	7.286	5.45	4.04	3.091	2.304	1.808	1.414	1.128	0.882812	0	11.6011	7.38352	40.0272	32.7028	19.9525	12.1416	1.7476	-4.76985	-13.8352	-15.9713	0	0	0	0	0	0	0	90.9799	58.4561	61.0725
					3.42257	65.4239	43.919	38.468	32.612	27.105	21.641	17.039	13.007	9.814	7.362	5.495	4.063	3.119	2.384	1.794	1.448	1.134	0.898438	0	11.7699	7.44175	40.3003	33.0738	19.9857	12.2727	1.76497	-4.79477	-13.9795	-16.1032	0	0	0	0	0	0	0	91.7316	58.9522	61.5686
					3.4434	66.0058	44.372	38.888	33.08	27.499	21.975	17.147	13.223	9.881	7.416	5.453	4.062	3.146	2.405	1.814	1.395	1.116	0.886719	0	11.8913	7.523	40.8786	33.5546	20.2942	12.3505	1.79428	-4.8275	-14.082	-15.9801	0	0	0	0	0	0	0	93.3967	60.0511	62.6676
					3.46424	66.5926	44.995	39.227	33.387	27.715	22.145	17.355	13.297	10.014	7.491	5.587	4.166	3.194	2.407	1.863	1.455	1.151	0.914062	0	12.0583	7.58858	41.258	33.8181	20.4512	12.5003	1.80432	-4.89248	-14.2244	-16.3728	0	0	0	0	0	0	0	93.989	60.442	63.0585
					3.48507	67.1843	45.431	39.521	33.89	27.939	22.439	17.569	13.472	10.126	7.566	5.676	4.188	3.207	2.447	1.793	1.46	1.159	0.910156	0	12.1751	7.64546	41.8796	34.0914	20.7227	12.6544	1.82807	-4.9472	-14.3669	-16.6336	0	0	0	0	0	0	0	95.0491	61.1417	63.7581
					3.5059	67.7811	45.914	40.215	34.007	28.282	22.75	17.723	13.598	10.312	7.659	5.78	4.258	3.269	2.494	1.909	1.514	1.202	0.921875	0	12.3045	7.77971	42.0242	34.51	21.0099	12.7653	1.84517	-5.03807	-14.5434	-16.9384	0	0	0	0	0	0	0	95.7189	61.5838	64.2002
					3.52674	68.3831	46.359	40.551	34.522	28.595	22.871	17.837	13.748	10.341	7.769	5.798	4.316	3.311	2.513	1.928	1.534	1.208	0.921875	0	12.4238	7.84471	42.6606	34.8919	21.1216	12.8475	1.86552	-5.05224	-14.7523	-16.9912	0	0	0	0	0	0	0	96.8599	62.3368	64.9533
					3.54757	68.9905	46.765	41.149	34.818	28.751	23.243	18.079	13.828	10.441	7.841	5.819	4.347	3.279	2.465	1.947	1.525	1.198	0.929688	0	12.5326	7.9604	43.0263	35.0823	21.4652	13.0218	1.87638	-5.1011	-14.889	-17.0527	0	0	0	0	0	0	0	97.9221	63.0379	65.6543
					3.5684	69.6034	47.494	41.3	35.344	29.156	23.446	18.288	14.024	10.567	7.917	5.822	4.421	3.351	2.537	2.002	1.576	1.205	0.960938	0	12.728	7.98961	43.6763	35.5764	21.6527	13.1723	1.90297	-5.16266	-15.0334	-17.0615	0	0	0	0	0	0	0	99.4408	64.0402	66.6567
					3.58924	70.2219	47.905	41.936	35.608	29.484	23.587	18.437	14.18	10.687	7.991	5.966	4.428	3.351	2.59	2	1.558	1.23	0.949219	0	12.8381	8.11265	44.0026	35.9767	21.7829	13.2796	1.92414	-5.22128	-15.1739	-17.4835	0	0	0	0	0	0	0	100.038	64.4344	67.0508
					3.61007	70.8462	48.328	42.305	36.046	29.787	23.939	18.68	14.267	10.799	8.049	5.983	4.473	3.423	2.607	2.01	1.605	1.259	0.972656	0	12.9515	8.18403	44.5438	36.3464	22.108	13.4546	1.93595	-5.276	-15.284	-17.5333	0	0	0	0	0	0	0	101.431	65.3537	67.9702
					3.6309	71.4764	48.796	42.95	36.257	30.157	24.126	18.916	14.459	10.934	8.117	6.064	4.588	3.465	2.652	2.061	1.616	1.253	0.972656	0	13.0769	8.30881	44.8046	36.7979	22.2807	13.6246	1.962	-5.34196	-15.4131	-17.7707	0	0	0	0	0	0	0	102.33	65.9469	68.5633
					3.65174	72.1126	49.309	43.329	36.996	30.281	24.453	19.088	14.581	11.048	8.198	6.162	4.608	3.453	2.656	2.036	1.588	1.273	0.988281	0	13.2144	8.38213	45.7178	36.9492	22.5826	13.7485	1.97855	-5.39766	-15.5669	-18.0579	0	0	0	0	0	0	0	103.551	66.7528	69.3692
					3.67257	72.755	49.752	43.887	37.125	30.712	24.504	19.265	14.757	11.137	8.355	6.199	4.634	3.526	2.66	2.067	1.618	1.18	0.992188	0	13.3331	8.49007	45.8772	37.4751	22.6297	13.876	2.00244	-5.44114	-15.8651	-18.1663	0	0	0	0	0	0	0	104.211	67.1887	69.8051
					3.6934	73.4038	50.722	44.08	37.65	31.037	24.894	19.471	14.835	11.191	8.375	6.278	4.658	3.559	2.691	2.084	1.636	1.303	1.016	0	13.593	8.52741	46.526	37.8717	22.9899	14.0244	2.01302	-5.46752	-15.903	-18.3978	0	0	0	0	0	0	0	105.777	68.2221	70.8386
					3.71424	74.0589	51.006	44.786	38.173	31.269	25.158	19.706	15.043	11.358	8.439	6.349	4.699	3.584	2.749	2.12	1.645	1.295	0.996094	0	13.6691	8.66399	47.1723	38.1547	23.2337	14.1936	2.04124	-5.54911	-16.0246	-18.6059	0	0	0	0	0	0	0	106.949	68.9958	71.6122
					3.73507	74.7207	51.639	45.111	38.298	31.64	25.474	19.789	15.238	11.458	8.62	6.386	4.804	3.634	2.777	2.155	1.636	1.293	1.039	0	13.8388	8.72686	47.3268	38.6074	23.5255	14.2534	2.06771	-5.59797	-16.3683	-18.7143	0	0	0	0	0	0	0	107.666	69.4689	72.0853
					3.7559	75.3892	52.144	45.562	38.963	31.984	25.517	20.075	15.305	11.482	8.559	6.361	4.73	3.623	2.757	2.147	1.666	1.302	1.031	0	13.9741	8.81411	48.1485	39.0272	23.5653	14.4594	2.0768	-5.60969	-16.2524	-18.641	0	0	0	0	0	0	0	109.562	70.7204	73.3369
					3.77674	76.0646	52.644	46.21	39.094	32.33	25.893	20.375	15.492	11.678	8.705	6.529	4.79	3.658	2.798	2.191	1.709	1.332	1.031	0	14.1081	8.93946	48.3104	39.4494	23.9125	14.6755	2.10217	-5.70545	-16.5297	-19.1334	0	0	0	0	0	0	0	110.129	71.0945	73.7109
					3.79757	76.747	53.37	46.598	39.63	32.572	26.198	20.403	15.677	11.809	8.751	6.583	4.892	3.726	2.857	2.202	1.711	1.349	1.031	0	14.3027	9.01452	48.9728	39.7447	24.1942	14.6957	2.12727	-5.76945	-16.617	-19.2916	0	0	0	0	0	0	0	111.374	71.9159	74.5324
					3.8184	77.4365	53.816	47.233	39.959	32.861	26.411	20.721	15.774	11.895	8.887	6.638	4.955	3.737	2.848	2.244	1.755	1.374	1.063	0	14.4222	9.13737	49.3793	40.0973	24.3909	14.9247	2.14044	-5.81147	-16.8753	-19.4528	0	0	0	0	0	0	0	112.353	72.5621	75.1786
					3.83924	78.1334	54.273	47.617	40.33	33.356	26.627	20.986	15.912	12.048	8.969	6.717	5	3.745	2.843	2.141	1.732	1.345	1.078	0	14.5447	9.21165	49.8378	40.7013	24.5904	15.1156	2.15916	-5.88622	-17.031	-19.6843	0	0	0	0	0	0	0	113.559	73.3583	75.9747
					3.86007	78.8376	54.797	48.045	40.884	33.61	26.912	21.056	16.058	12.071	9.032	6.719	5.059	3.82	2.92	2.237	1.71	1.377	1.078	0	14.6851	9.29445	50.5224	41.0113	24.8536	15.166	2.17897	-5.89746	-17.1506	-19.6902	0	0	0	0	0	0	0	114.974	74.2918	76.9083
					3.88091	79.5498	55.562	48.693	41.011	34.127	27.16	21.185	16.162	12.288	9.145	6.861	5.094	3.845	2.956	2.252	1.787	1.42	1.047	0	14.8901	9.41981	50.6793	41.6421	25.0826	15.2589	2.19309	-6.00347	-17.3652	-20.1063	0	0	0	0	0	0	0	115.691	74.7654	77.3818
					3.90175	80.2692	56.036	49.183	41.617	34.324	27.504	21.579	16.376	12.432	9.213	6.881	5.215	3.904	2.978	2.326	1.789	1.426	1.094	0	15.0171	9.5146	51.4282	41.8825	25.4003	15.5427	2.22212	-6.07383	-17.4943	-20.1649	0	0	0	0	0	0	0	117.275	75.8105	78.4269
					3.92258	80.9966	56.706	49.253	42.105	34.508	27.54	21.685	16.6	12.468	9.343	6.986	5.226	3.955	3.04	2.333	1.839	1.429	1.109	0	15.1967	9.52814	52.0313	42.107	25.4335	15.6191	2.25252	-6.09142	-17.7411	-20.4726	0	0	0	0	0	0	0	117.863	76.1989	78.8154
					3.94341	81.7318	57.275	50.238	42.269	35.123	28.052	21.905	16.795	12.648	9.479	7.055	5.284	4.025	3.035	2.356	1.828	1.43	1.125	0	15.3492	9.71869	52.2339	42.8574	25.9064	15.7775	2.27898	-6.17936	-17.9994	-20.6748	0	0	0	0	0	0	0	119.269	77.1265	79.743
					3.96425	82.4752	57.808	50.63	42.859	35.409	28.266	22.199	16.945	12.758	9.623	7.118	5.332	4.045	3.089	2.414	1.893	1.481	1.148	0	15.492	9.79453	52.963	43.2064	26.104	15.9893	2.29933	-6.2331	-18.2728	-20.8594	0	0	0	0	0	0	0	120.483	77.9282	80.5447
					3.98508	83.2391	58.119	50.919	43.088	35.512	28.539	22.314	17.091	12.827	9.647	7.132	5.432	4.117	3.142	2.454	1.936	1.514	1.18	0	15.5754	9.85043	53.246	43.3321	26.3561	16.0721	2.31915	-6.26681	-18.3184	-20.9005	0	0	0	0	0	0	0	121.266	78.4446	81.061
					4.00591	84.0436	58.777	51.369	43.698	35.895	28.778	22.521	17.268	13.118	9.759	7.367	5.553	4.201	3.224	2.516	1.978	1.55	1.211	0	15.7517	9.93749	53.9998	43.7994	26.5768	16.2212	2.34316	-6.40898	-18.5311	-21.5891	0	0	0	0	0	0	0	122.1	78.9956	81.612
					4.02675	84.8871	59.384	51.817	44.082	36.323	29.208	22.759	17.522	13.271	9.997	7.443	5.668	4.301	3.312	2.571	2.027	1.607	1.242	0	15.9144	10.0242	54.4743	44.3217	26.9739	16.3926	2.37763	-6.48373	-18.983	-21.8119	0	0	0	0	0	0	0	123.2	79.7214	82.3379
					4.04758	85.7676	59.924	52.296	44.512	36.978	29.458	23.092	17.689	13.38	10.084	7.558	5.71	4.317	3.338	2.582	2.033	1.533	1.219	0	16.0591	10.1168	55.0057	45.1209	27.2048	16.6325	2.40029	-6.53699	-19.1482	-22.1489	0	0	0	0	0	0	0	124.706	80.7153	83.3318
					4.06841	86.6831	60.506	53.02	45.118	37.004	29.776	23.344	17.831	13.481	10.077	7.581	5.708	4.33	3.316	2.586	2.027	1.585	1.234	0	16.2151	10.2569	55.7546	45.1527	27.4985	16.814	2.41956	-6.58633	-19.1349	-22.2163	0	0	0	0	0	0	0	126.174	81.6839	84.3004
					4.08925	87.6316	61.23	53.372	45.407	37.447	29.912	23.46	17.877	13.619	10.162	7.61	5.739	4.35	3.357	2.582	2.046	1.579	1.234	0	16.4091	10.325	56.1117	45.6932	27.6241	16.8975	2.4258	-6.65375	-19.2963	-22.3013	0	0	0	0	0	0	0	127.235	82.3844	85.0009
					4.11008	88.611	60.543	53.004	45.07	37.133	29.708	23.137	17.831	13.403	10.015	7.507	5.648	4.281	3.254	2.501	1.954	1.541	1.203	0	16.225	10.2538	55.6953	45.3101	27.4357	16.6649	2.41956	-6.54822	-19.0172	-21.9994	0	0	0	0	0	0	0	126.439	81.8593	84.4758
					4.13091	89.6193	61.357	53.726	45.492	37.364	30.001	23.625	17.953	13.615	10.149	7.601	5.742	4.316	3.316	2.564	2.016	1.576	1.234	0	16.4431	10.3935	56.2167	45.5919	27.7063	17.0164	2.43611	-6.6518	-19.2716	-22.2749	0	0	0	0	0	0	0	127.606	82.6291	85.2455
					4.15175	90.6545	62.243	54.042	46.199	37.828	30.399	23.848	18.141	13.81	10.294	7.708	5.798	4.326	3.371	2.605	2.007	1.594	1.242	0	16.6806	10.4546	57.0904	46.1581	28.0738	17.177	2.46162	-6.74707	-19.547	-22.5884	0	0	0	0	0	0	0	129.214	83.6903	86.3068
					4.17258	91.7146	62.559	54.785	46.615	38.499	30.689	24.072	18.5	13.88	10.496	7.792	5.85	4.449	3.396	2.638	2.053	1.61	1.258	0	16.7652	10.5983	57.6045	46.9769	28.3417	17.3383	2.51034	-6.78127	-19.9305	-22.8346	0	0	0	0	0	0	0	130.589	84.5979	87.2144
					4.19341	92.7975	63.431	55.307	47.018	38.909	31.074	24.268	18.665	14.111	10.542	7.903	5.916	4.487	3.422	2.671	2.059	1.586	1.242	0	16.9989	10.6993	58.1025	47.4772	28.6972	17.4795	2.53273	-6.89413	-20.0179	-23.1599	0	0	0	0	0	0	0	131.915	85.4735	88.0899
					4.21425	93.9013	64.477	55.773	47.65	39.058	31.272	24.541	18.764	14.246	10.623	7.934	5.92	4.531	3.423	2.663	2.072	1.615	1.25	0	17.2793	10.7895	58.8835	47.659	28.8801	17.6761	2.54616	-6.96008	-20.1717	-23.2507	0	0	0	0	0	0	0	133.331	86.4078	89.0242
					4.23508	95.0239	64.996	56.408	47.925	39.258	31.719	24.681	18.888	14.338	10.71	7.98	5.982	4.554	3.465	2.66	2.091	1.621	1.258	0	17.4183	10.9123	59.2233	47.903	29.2929	17.777	2.56299	-7.00503	-20.3369	-23.3855	0	0	0	0	0	0	0	134.362	87.0884	89.7049
					4.25591	96.1633	65.075	57.131	48.348	39.881	31.959	24.879	19.145	14.457	10.785	8.019	6.001	4.62	3.485	2.71	2.106	1.644	1.273	0	17.4395	11.0522	59.746	48.6632	29.5145	17.9196	2.59786	-7.06317	-20.4793	-23.4998	0	0	0	0	0	0	0	135.891	88.0971	90.7135
					4.27675	97.3175	65.687	57.586	48.942	40.198	32.191	25.04	19.371	14.48	10.899	8.158	6.107	4.652	3.516	2.745	2.139	1.654	1.289	0	17.6035	11.1402	60.4801	49.05	29.7288	18.0356	2.62853	-7.07441	-20.6958	-23.9072	0	0	0	0	0	0	0	136.989	88.8222	91.4387
					4.29758	98.4845	66.695	58.008	49.271	40.735	32.261	25.434	19.393	14.74	10.97	8.233	6.137	4.663	3.552	2.75	2.111	1.664	1.297	0	17.8737	11.2218	60.8866	49.7053	29.7934	18.3193	2.63151	-7.20143	-20.8306	-24.127	0	0	0	0	0	0	0	138.273	89.6692	92.2857
					4.31841	99.6622	67.214	58.685	49.685	40.75	32.903	25.583	19.594	14.803	11.019	8.301	6.157	4.695	3.565	2.756	2.147	1.657	1.305	0	18.0127	11.3528	61.3982	49.7236	30.3863	18.4267	2.65879	-7.23221	-20.9236	-24.3262	0	0	0	0	0	0	0	139.477	90.4641	93.0806
					4.33925	100.849	67.869	59.166	50.043	41.286	33.103	25.764	19.867	14.903	11.167	8.354	6.246	4.749	3.596	2.795	2.163	1.683	1.273	0	18.1883	11.4458	61.8406	50.3776	30.571	18.557	2.69583	-7.28107	-21.2047	-24.4816	0	0	0	0	0	0	0	140.709	91.2772	93.8936
					4.36008	102.042	68.297	59.535	50.594	41.56	33.256	26.015	19.955	15.018	11.292	8.39	6.308	4.752	3.595	2.793	2.179	1.715	1.313	0	18.303	11.5172	62.5215	50.7119	30.7123	18.7378	2.70777	-7.33725	-21.442	-24.5871	0	0	0	0	0	0	0	141.845	92.0271	94.6436
					4.38091	103.24	69.445	60.067	51.24	41.899	33.594	26.266	20.159	15.234	11.365	8.439	6.344	4.797	3.658	2.831	2.209	1.72	1.328	0	18.6106	11.6201	63.3198	51.1256	31.0245	18.9186	2.73546	-7.44278	-21.5807	-24.7307	0	0	0	0	0	0	0	143.601	93.1857	95.8022
					4.40175	104.44	69.909	60.688	51.362	42.391	33.836	26.464	20.193	15.295	11.401	8.538	6.37	4.815	3.673	2.843	2.191	1.715	1.32	0	18.735	11.7403	63.4706	51.7259	31.248	19.0612	2.74007	-7.47259	-21.649	-25.0208	0	0	0	0	0	0	0	144.579	93.8312	96.4477
					4.42258	105.641	70.498	61.16	51.951	42.669	34.105	26.679	20.469	15.414	11.557	8.58	6.427	4.85	3.719	2.833	2.211	1.723	1.32	0	18.8928	11.8316	64.1984	52.0651	31.4964	19.2161	2.77752	-7.53073	-21.9452	-25.1439	0	0	0	0	0	0	0	145.858	94.6757	97.2921
					4.44341	106.841	70.692	61.864	52.357	43.225	34.352	26.984	20.532	15.576	11.64	8.721	6.495	4.92	3.739	2.883	2.248	1.746	1.352	0	18.9448	11.9678	64.7002	52.7436	31.7245	19.4358	2.78607	-7.60987	-22.1028	-25.5571	0	0	0	0	0	0	0	147.033	95.451	98.0675
					4.46425	108.038	71.813	62.342	52.966	43.259	34.831	27.175	20.767	15.693	11.787	8.791	6.545	4.993	3.741	2.904	2.226	1.742	1.352	0	19.2452	12.0602	65.4527	52.7851	32.1668	19.5733	2.81796	-7.66703	-22.382	-25.7622	0	0	0	0	0	0	0	148.29	96.2808	98.8973
					4.48508	109.229	72.017	63.065	53.312	43.826	35.017	27.464	20.914	15.852	11.863	8.854	6.62	5.004	3.831	2.96	2.311	1.799	1.383	0	19.2999	12.2001	65.8803	53.4769	32.3386	19.7815	2.8379	-7.74472	-22.5263	-25.9468	0	0	0	0	0	0	0	149.597	97.1436	99.7601
					4.50591	110.412	72.957	63.256	53.906	44.129	35.493	27.528	21.194	15.947	11.948	8.995	6.671	5.077	3.86	2.996	2.319	1.817	1.406	0	19.5518	12.2371	66.6143	53.8466	32.7782	19.8276	2.8759	-7.79113	-22.6877	-26.36	0	0	0	0	0	0	0	150.893	97.9985	100.615
					4.52676	111.587	73.553	64.431	54.092	44.656	35.726	27.831	21.359	16.124	12.061	8.967	6.695	5.118	3.872	2.973	2.337	1.826	1.406	0	19.7115	12.4644	66.8442	54.4897	32.9934	20.0458	2.89829	-7.87761	-22.9023	-26.278	0	0	0	0	0	0	0	152.389	98.9863	101.603
					4.54759	112.75	74.086	64.819	54.7	44.945	35.892	28.001	21.609	16.18	12.171	9.008	6.8	5.148	3.922	2.973	2.362	1.846	1.383	0	19.8544	12.5394	67.5955	54.8423	33.1467	20.1683	2.93221	-7.90497	-23.1111	-26.3981	0	0	0	0	0	0	0	153.665	99.8279	102.444
					4.56843	113.899	74.631	65.204	55.08	45.498	36.144	28.265	21.722	16.146	12.301	9.127	6.905	5.216	3.978	3.056	2.382	1.858	1.43	0	20.0004	12.6139	68.0651	55.5171	33.3794	20.3584	2.94755	-7.88835	-23.358	-26.7469	0	0	0	0	0	0	0	154.889	100.636	103.252
					4.58926	115.032	75.192	65.677	55.675	45.549	36.718	28.481	21.756	16.608	12.327	9.277	6.964	5.274	4.023	3.107	2.409	1.886	1.453	0	20.1508	12.7054	68.8004	55.5793	33.9095	20.514	2.95216	-8.11407	-23.4074	-27.1864	0	0	0	0	0	0	0	155.904	101.306	103.922
					4.61009	116.149	76.235	66.135	56.085	46.078	36.757	28.851	21.973	16.586	12.421	9.297	6.94	5.301	4.007	3.122	2.423	1.864	1.445	0	20.4303	12.794	69.307	56.2248	33.9455	20.7805	2.9816	-8.10332	-23.5859	-27.245	0	0	0	0	0	0	0	157.53	102.379	104.995
					4.63093	117.245	76.705	66.887	56.366	46.33	37.182	28.925	22.246	16.629	12.592	9.412	7.047	5.343	4.063	3.181	2.478	1.918	1.492	0	20.5562	12.9395	69.6543	56.5323	34.338	20.8338	3.01865	-8.12433	-23.9106	-27.5821	0	0	0	0	0	0	0	158.256	102.858	105.475
					4.65176	118.32	77.209	67.254	56.933	46.523	37.484	29.055	22.361	16.874	12.572	9.483	7.075	5.4	4.12	3.185	2.473	1.922	1.492	0	20.6913	13.0105	70.355	56.7678	34.6169	20.9274	3.03425	-8.24403	-23.8726	-27.7901	0	0	0	0	0	0	0	159.496	103.677	106.293
					4.67259	119.372	77.735	67.559	57.283	47.065	37.556	29.317	22.452	16.912	12.71	9.543	7.149	5.42	4.154	3.2	2.474	1.923	1.5	0	20.8323	13.0695	70.7875	57.4292	34.6834	21.1162	3.0466	-8.26259	-24.1346	-27.966	0	0	0	0	0	0	0	160.601	104.406	107.023
					4.69343	120.398	78.142	68.223	57.555	47.293	37.965	29.452	22.556	17.092	12.781	9.595	7.189	5.491	4.172	3.25	2.518	1.982	1.531	0	20.9414	13.1979	71.1236	57.7074	35.0611	21.2134	3.06071	-8.35054	-24.2695	-28.1183	0	0	0	0	0	0	0	161.567	105.044	107.66
					4.71426	121.396	79.268	68.695	58.166	47.578	38.153	29.73	22.688	17.137	12.903	9.658	7.223	5.506	4.209	3.247	2.545	1.982	1.539	0	21.2431	13.2893	71.8786	58.0552	35.2348	21.4136	3.07863	-8.37252	-24.5011	-28.303	0	0	0	0	0	0	0	163.017	106	108.617
					4.73509	122.365	79.665	69.387	58.465	47.782	38.274	29.88	22.907	17.256	12.999	9.687	7.25	5.548	4.225	3.284	2.575	1.955	1.539	0	21.3495	13.4231	72.2481	58.3041	35.3465	21.5217	3.10834	-8.43066	-24.6834	-28.3879	0	0	0	0	0	0	0	163.799	106.517	109.133
					4.75593	123.302	80.149	69.698	58.943	48.018	38.579	30.102	22.985	17.318	13.006	9.804	7.329	5.582	4.271	3.301	2.579	2.029	1.539	0	21.4792	13.4833	72.8388	58.592	35.6282	21.6816	3.11893	-8.46095	-24.6967	-28.7308	0	0	0	0	0	0	0	164.934	107.265	109.882
					4.77676	124.205	80.619	70.476	59.122	48.542	38.793	30.269	23.127	17.603	13.066	9.826	7.395	5.615	4.312	3.322	2.602	2.03	1.563	0	21.6052	13.6338	73.06	59.2314	35.8258	21.8019	3.1382	-8.60019	-24.8106	-28.7953	0	0	0	0	0	0	0	166.09	108.029	110.645
					4.79759	125.072	81.001	70.541	59.612	48.782	39.111	30.407	23.353	17.532	13.202	9.794	7.434	5.631	4.344	3.305	2.614	2.047	1.586	0	21.7075	13.6464	73.6655	59.5243	36.1195	21.9012	3.16886	-8.5655	-25.0689	-28.7015	0	0	0	0	0	0	0	167.397	108.892	111.508
					4.81843	125.902	81.982	70.928	59.994	49.077	39.338	30.706	23.472	17.723	13.269	9.94	7.495	5.667	4.358	3.371	2.616	2.042	1.516	0	21.9704	13.7212	74.1376	59.8842	36.3291	22.1166	3.18501	-8.65882	-25.1961	-29.1294	0	0	0	0	0	0	0	168.36	109.527	112.143
					4.83926	126.693	82.019	71.841	60.308	49.533	39.666	30.857	23.561	17.858	13.341	10.002	7.538	5.73	4.394	3.392	2.668	2.063	1.609	0	21.9804	13.8979	74.5256	60.4407	36.632	22.2254	3.19709	-8.72478	-25.3328	-29.3111	0	0	0	0	0	0	0	169.53	110.299	112.916
					4.86009	127.441	83.16	72.021	61	50.136	39.761	31.178	23.869	17.979	13.474	10.105	7.566	5.772	4.39	3.402	2.631	2.034	1.594	0	22.2861	13.9327	75.3807	61.1764	36.7198	22.4566	3.23888	-8.78389	-25.5854	-29.6129	0	0	0	0	0	0	0	171.209	111.407	114.024
					4.88093	128.146	83.022	72.982	61.226	50.092	40.209	31.149	23.935	18.072	13.518	10.166	7.621	5.768	4.424	3.436	2.672	2.084	1.617	0	22.2491	14.1186	75.66	61.1228	37.1335	22.4357	3.24784	-8.82933	-25.6689	-29.7917	0	0	0	0	0	0	0	171.678	111.717	114.333
					4.90176	128.805	83.506	73.234	61.538	50.621	40.28	31.561	24.105	18.214	13.679	10.218	7.683	5.831	4.465	3.444	2.681	2.071	1.609	0	22.3789	14.1673	76.0456	61.7683	37.1991	22.7324	3.2709	-8.8987	-25.9746	-29.9441	0	0	0	0	0	0	0	172.745	112.421	115.037
					4.92259	129.416	84.336	73.471	61.826	50.838	40.627	31.645	24.348	18.293	13.751	10.366	7.768	5.934	4.507	3.487	2.734	2.104	1.656	0	22.6013	14.2132	76.4015	62.033	37.5195	22.7929	3.30388	-8.9373	-26.1114	-30.3778	0	0	0	0	0	0	0	173.439	112.879	115.495
					4.94343	129.977	84.645	73.881	62.034	51.032	40.91	31.868	24.287	18.452	13.803	10.354	7.803	5.928	4.537	3.515	2.727	2.129	1.664	0	22.6841	14.2925	76.6585	62.2698	37.7809	22.9536	3.2956	-9.01498	-26.2101	-30.3426	0	0	0	0	0	0	0	174.367	113.492	116.108
					4.96426	130.486	85.054	74.15	62.578	51.271	41.018	32.061	24.573	18.526	13.972	10.469	7.899	5.988	4.587	3.561	2.77	2.178	1.695	0	22.7937	14.3445	77.3308	62.5614	37.8806	23.0926	3.33441	-9.05114	-26.531	-30.6796	0	0	0	0	0	0	0	175.076	113.96	116.576
					4.98509	130.948	85.91	74.264	62.886	51.733	41.19	32.113	24.651	18.67	14.023	10.551	7.921	6.031	4.568	3.571	2.785	2.176	1.68	0	23.0231	14.3666	77.7114	63.1251	38.0395	23.13	3.34499	-9.12149	-26.6279	-30.9199	0	0	0	0	0	0	0	176.071	114.616	117.233
					5.00593	131.402	86.275	74.881	63.122	51.909	41.349	32.349	24.771	18.804	14.072	10.593	7.939	6.059	4.566	3.591	2.784	2.185	1.688	0	23.1209	14.486	78.003	63.3399	38.1863	23.3	3.36128	-9.18696	-26.7209	-31.043	0	0	0	0	0	0	0	176.847	115.128	117.744
					5.02676	131.854	86.256	75.131	63.676	52.197	41.583	32.522	25.07	18.98	14.189	10.692	8.086	6.13	4.711	3.639	2.836	2.216	1.719	0	23.1158	14.5343	78.6876	63.6913	38.4024	23.4246	3.40185	-9.27294	-26.9431	-31.3331	0	0	0	0	0	0	0	177.709	115.697	118.314
					5.04759	132.305	86.94	75.082	63.909	52.42	41.773	32.798	25.192	19.071	14.329	10.759	8.174	6.144	4.746	3.664	2.855	2.219	1.75	0	23.2991	14.5248	78.9755	63.9634	38.5779	23.6234	3.4184	-9.3174	-27.2089	-31.5295	0	0	0	0	0	0	0	178.327	116.105	118.721
					5.06843	132.753	87.231	75.928	63.999	52.28	42.081	32.866	25.213	19.086	14.331	10.802	8.075	6.175	4.69	3.654	2.827	2.184	1.695	0	23.3771	14.6885	79.0868	63.7926	38.8623	23.6724	3.42125	-9.32473	-27.2127	-31.6555	0	0	0	0	0	0	0	178.708	116.357	118.973
					5.08926	133.198	87.099	76.286	64.027	52.923	42.202	32.771	25.368	19.107	14.361	10.802	8.084	6.129	4.679	3.55	2.779	2.153	1.656	0	23.3417	14.7578	79.1214	64.5772	38.9741	23.604	3.44229	-9.33499	-27.2697	-31.6555	0	0	0	0	0	0	0	179.558	116.918	119.534
					5.11009	133.641	87.664	76.328	64.121	52.97	42.249	32.854	25.287	19.16	14.416	10.763	8.109	6.148	4.654	3.602	2.797	2.183	1.672	0	23.4932	14.7659	79.2375	64.6345	39.0175	23.6638	3.43129	-9.36089	-27.3741	-31.5412	0	0	0	0	0	0	0	179.967	117.188	119.804
					5.13093	134.08	87.991	76.088	64.536	53.127	42.401	33.074	25.4	19.287	14.439	10.858	8.093	6.166	4.692	3.594	2.795	2.17	1.656	0	23.5808	14.7195	79.7504	64.8261	39.1578	23.8222	3.44663	-9.42293	-27.4178	-31.8196	0	0	0	0	0	0	0	180.643	117.634	120.25
					5.15176	134.515	88.273	76.857	64.977	53.046	42.733	33.196	25.408	19.338	14.476	10.831	8.073	6.173	4.667	3.604	2.763	2.115	1.648	0	23.6564	14.8682	80.2953	64.7273	39.4644	23.9101	3.44771	-9.44785	-27.488	-31.7405	0	0	0	0	0	0	0	181.693	118.327	120.943
					5.1726	134.946	88.314	76.896	64.513	53.342	42.53	33.346	25.586	19.304	14.557	10.846	8.183	6.189	4.701	3.626	2.815	2.198	1.68	0	23.6674	14.8758	79.7219	65.0884	39.277	24.0181	3.47187	-9.43124	-27.6419	-31.7844	0	0	0	0	0	0	0	181.263	118.043	120.659
					5.19344	135.373	88.537	77.009	65.339	53.469	42.662	33.298	25.702	19.393	14.667	10.96	8.234	6.219	4.76	3.643	2.829	2.191	1.688	0	23.7271	14.8976	80.7427	65.2434	39.3989	23.9836	3.48761	-9.47472	-27.8507	-32.1185	0	0	0	0	0	0	0	182.037	118.554	121.17
					5.21427	135.794	88.735	77.285	65.184	53.63	42.768	33.695	25.738	19.462	14.639	11.047	8.206	6.229	4.778	3.639	2.822	2.216	1.695	0	23.7802	14.951	80.5511	65.4399	39.4968	24.2695	3.49249	-9.50843	-27.7976	-32.3735	0	0	0	0	0	0	0	182.301	118.728	121.345
					5.2351	136.21	89.074	77.982	65.081	53.764	43.152	33.653	25.813	19.555	14.716	11.043	8.208	6.249	4.723	3.644	2.828	2.193	1.633	0	23.871	15.0859	80.4238	65.6034	39.8514	24.2392	3.50267	-9.55387	-27.9438	-32.3617	0	0	0	0	0	0	0	182.718	119.003	121.62
					5.25594	136.62	89.066	77.531	65.616	53.802	43.188	33.568	25.897	19.697	14.765	11.117	8.271	6.334	4.799	3.686	2.85	2.208	1.703	0	23.8689	14.9986	81.085	65.6497	39.8846	24.178	3.51407	-9.62325	-28.0368	-32.5786	0	0	0	0	0	0	0	182.94	119.15	121.766
					5.27677	137.024	89.791	77.765	65.562	54.215	43.068	33.952	25.967	19.67	14.817	11.131	8.358	6.283	4.797	3.681	2.843	2.202	1.68	0	24.0632	15.0439	81.0182	66.1537	39.7738	24.4546	3.52357	-9.61005	-28.1356	-32.6196	0	0	0	0	0	0	0	183.666	119.629	122.245
					5.2976	137.421	89.513	78.414	65.773	54.088	43.423	33.872	26.025	19.797	14.852	11.098	8.14	6.269	4.742	3.623	2.775	2.156	1.641	0	23.9887	15.1694	81.279	65.9987	40.1017	24.397	3.53144	-9.6721	-28.202	-32.5229	0	0	0	0	0	0	0	184.069	119.895	122.511
					5.31844	137.812	89.523	78.432	65.848	54.112	43.435	33.906	26.062	19.832	14.844	11.172	8.317	6.356	4.835	3.688	2.868	2.208	1.703	0	23.9914	15.1729	81.3717	66.028	40.1127	24.4215	3.53646	-9.6892	-28.1868	-32.7398	0	0	0	0	0	0	0	184.019	119.862	122.478
					5.33927	138.194	89.661	78.058	66.132	54.484	43.312	34.123	26.232	19.828	14.974	11.219	8.4	6.377	4.868	3.714	2.869	2.212	1.633	0	24.0283	15.1006	81.7226	66.4819	39.9992	24.5778	3.55953	-9.68725	-28.4337	-32.8775	0	0	0	0	0	0	0	184.471	120.16	122.777
					5.3601	138.569	90.239	78.14	66.284	54.318	43.641	34.043	26.346	19.926	15.025	11.305	8.409	6.413	4.878	3.749	2.853	2.239	1.688	0	24.1832	15.1164	81.9105	66.2794	40.303	24.5202	3.57499	-9.73513	-28.5305	-33.1295	0	0	0	0	0	0	0	184.492	120.174	122.791
					5.38094	138.936	90.34	78.212	66.45	54.395	43.719	34.173	26.28	20.054	15.085	11.348	8.447	6.44	4.875	3.706	2.871	2.222	1.711	0	24.2103	15.1303	82.1156	66.3733	40.375	24.6138	3.56604	-9.79766	-28.6445	-33.2555	0	0	0	0	0	0	0	184.687	120.303	122.919
					5.40177	139.294	90.456	78.299	66.187	54.745	43.743	34.06	26.43	20.003	15.159	11.365	8.479	6.456	4.881	3.751	2.91	2.259	1.719	0	24.2414	15.1472	81.7906	66.8004	40.3972	24.5324	3.58639	-9.77275	-28.785	-33.3054	0	0	0	0	0	0	0	184.632	120.267	122.883
					5.4226	139.644	90.109	78.949	66.435	54.596	43.876	34.471	26.395	20.216	15.147	11.392	8.518	6.491	4.876	3.77	2.903	2.25	1.727	0	24.1484	15.2729	82.0971	66.6186	40.52	24.8284	3.58164	-9.87681	-28.7622	-33.3845	0	0	0	0	0	0	0	185.044	120.538	123.155
					5.44344	139.983	90.88	78.719	66.886	54.758	44.004	34.666	26.501	20.369	15.237	11.407	8.543	6.455	4.846	3.739	2.835	2.212	1.695	0	24.355	15.2284	82.6544	66.8163	40.6382	24.9689	3.59603	-9.95156	-28.9331	-33.4284	0	0	0	0	0	0	0	185.944	121.132	123.749
					5.46427	140.313	90.513	79.332	66.517	55.083	44.122	34.562	26.673	20.336	15.297	11.455	8.609	6.522	4.856	3.781	2.895	2.23	1.688	0	24.2567	15.347	82.1984	67.2128	40.7472	24.894	3.61937	-9.93544	-29.047	-33.5691	0	0	0	0	0	0	0	185.724	120.987	123.604
					5.4851	140.633	90.562	79.283	66.576	55.142	44.16	34.715	26.735	20.347	15.357	11.506	8.64	6.559	4.932	3.767	2.923	2.245	1.711	0	24.2698	15.3375	82.2713	67.2848	40.7823	25.0042	3.62778	-9.94081	-29.1609	-33.7186	0	0	0	0	0	0	0	185.757	121.009	123.626
					5.50594	140.942	90.63	79.415	66.714	55.002	44.258	34.826	26.758	20.474	15.333	11.519	8.585	6.536	4.948	3.67	2.919	2.223	1.68	0	24.288	15.3631	82.4418	67.114	40.8728	25.0841	3.6309	-10.0029	-29.1154	-33.7567	0	0	0	0	0	0	0	185.92	121.116	123.733
					5.52677	141.24	91.171	79.061	67.419	55.105	44.332	34.998	26.81	20.451	15.376	11.582	8.635	6.532	4.96	3.751	2.884	2.193	1.695	0	24.433	15.2946	83.313	67.2397	40.9411	25.208	3.63796	-9.99162	-29.197	-33.9413	0	0	0	0	0	0	0	186.937	121.788	124.404
					5.5476	141.527	90.707	79.099	67.103	55.432	44.447	34.924	26.916	20.515	15.548	11.634	8.771	6.637	4.952	3.818	2.953	2.252	1.734	0	24.3087	15.3019	82.9225	67.6387	41.0473	25.1547	3.65234	-10.0229	-29.5236	-34.0937	0	0	0	0	0	0	0	186.386	121.424	124.041
					5.56844	141.802	91.264	79.18	67.381	55.306	44.575	35.015	27.194	20.659	15.656	11.751	8.899	6.714	5.116	3.937	3.04	2.332	1.797	0	24.4579	15.3176	83.2661	67.4849	41.1655	25.2203	3.69006	-10.0932	-29.7287	-34.4365	0	0	0	0	0	0	0	186.344	121.396	124.013
					5.58927	142.065	91.465	79.391	67.078	55.694	44.684	35.21	27.132	20.761	15.695	11.819	8.933	6.705	5.073	3.915	3.013	2.301	1.758	0	24.5118	15.3584	82.8916	67.9584	41.2662	25.3607	3.68165	-10.1431	-29.8028	-34.6358	0	0	0	0	0	0	0	186.447	121.464	124.081
					5.6101	142.315	91.054	79.984	67.26	55.531	44.793	35.292	27.312	20.813	15.713	11.856	8.833	6.691	5.088	3.881	2.97	2.307	1.758	0	24.4017	15.4731	83.1165	67.7595	41.3669	25.4198	3.70607	-10.1685	-29.8369	-34.7442	0	0	0	0	0	0	0	186.494	121.495	124.112
					5.63094	142.552	91.117	79.501	67.978	55.636	44.882	35.256	27.433	20.908	15.816	11.989	8.946	6.783	5.145	3.942	3.044	2.321	1.758	0	24.4185	15.3797	84.0038	67.8876	41.4491	25.3938	3.72249	-10.2149	-30.0325	-35.134	0	0	0	0	0	0	0	186.874	121.746	124.362
					5.65177	142.776	91.301	79.753	67.923	55.832	45.03	35.738	27.494	20.898	15.904	11.961	8.943	6.812	5.134	3.892	3.042	2.335	1.789	0	24.4678	15.4285	83.9358	68.1268	41.5857	25.741	3.73077	-10.21	-30.1996	-35.0519	0	0	0	0	0	0	0	187.555	122.196	124.812
					5.6726	142.986	91.295	79.714	67.931	55.855	45.051	35.604	27.537	21.012	15.883	11.951	8.938	6.791	5.144	3.902	2.998	2.296	1.711	0	24.4662	15.4209	83.9457	68.1548	41.6051	25.6445	3.73661	-10.2657	-30.1598	-35.0226	0	0	0	0	0	0	0	187.526	122.176	124.793
					5.69344	143.182	91.96	79.906	67.88	56.044	45.258	35.92	27.701	21.181	16.052	12.084	9.067	6.844	5.217	3.963	2.975	2.283	1.727	0	24.6445	15.4581	83.8827	68.3854	41.7963	25.8721	3.75886	-10.3483	-30.4807	-35.4124	0	0	0	0	0	0	0	187.557	122.197	124.813
					5.71427	143.363	91.537	80.026	68.047	56.393	45.357	35.987	27.747	21.175	16.031	12.097	9.034	6.871	5.215	4.023	3.089	2.285	1.734	0	24.5311	15.4813	84.0891	68.8113	41.8877	25.9204	3.7651	-10.3453	-30.4408	-35.4505	0	0	0	0	0	0	0	188.249	122.654	125.27
					5.7351	143.529	91.706	80.214	68.342	56.255	45.729	35.811	27.886	21.432	16.131	12.221	9.14	6.924	5.227	4.005	3.105	2.374	1.805	0	24.5764	15.5176	84.4536	68.6429	42.2313	25.7936	3.78396	-10.4709	-30.6307	-35.8139	0	0	0	0	0	0	0	188.084	122.545	125.161
					5.75594	143.68	91.729	80.243	68.137	56.701	45.59	36.107	28.117	21.494	16.15	12.295	9.158	6.943	5.269	3.999	3.027	2.347	1.813	0	24.5825	15.5232	84.2003	69.1871	42.1029	26.0068	3.81531	-10.5012	-30.6668	-36.0307	0	0	0	0	0	0	0	188.22	122.634	125.251
					5.77677	143.815	92.373	80.45	68.249	56.515	45.956	36.066	28.195	21.598	16.264	12.36	9.22	6.999	5.226	3.993	3.048	2.354	1.766	0	24.7551	15.5633	84.3387	68.9602	42.4409	25.9773	3.82589	-10.552	-30.8832	-36.2212	0	0	0	0	0	0	0	188.205	122.625	125.241
					5.7976	143.934	92.063	80.558	68.997	56.647	45.825	36.433	28.207	21.512	16.468	12.365	9.264	7.059	5.317	4.084	3.114	2.379	1.789	0	24.6721	15.5842	85.263	69.1212	42.3199	26.2416	3.82752	-10.51	-31.2706	-36.2359	0	0	0	0	0	0	0	189.013	123.158	125.774
					5.81845	144.036	92.075	80.574	68.791	56.787	46.189	36.492	28.255	21.765	16.537	12.476	9.35	7.086	5.344	4.11	3.137	2.368	1.836	0	24.6753	15.5873	85.0085	69.2921	42.6561	26.2841	3.83403	-10.6336	-31.4016	-36.5612	0	0	0	0	0	0	0	188.741	122.978	125.595
					5.83928	144.122	92.137	80.653	68.813	56.888	46.061	36.641	28.483	21.835	16.538	12.532	9.393	7.124	5.354	4.083	3.118	2.39	1.836	0	24.6919	15.6026	85.0357	69.4153	42.5379	26.3914	3.86497	-10.6678	-31.4035	-36.7253	0	0	0	0	0	0	0	188.743	122.98	125.596
					5.86012	144.19	92.206	80.797	68.717	57.212	46.171	36.655	28.574	21.901	16.631	12.606	9.433	7.154	5.398	4.069	3.152	2.411	1.844	0	24.7104	15.6304	84.917	69.8107	42.6395	26.4015	3.87732	-10.7	-31.5801	-36.9421	0	0	0	0	0	0	0	188.764	122.994	125.61
					5.88095	144.24	92.249	80.827	68.727	57.079	46.31	36.923	28.702	22.009	16.855	12.653	9.529	7.217	5.419	4.146	3.156	2.41	1.844	0	24.7219	15.6362	84.9294	69.6484	42.7678	26.5945	3.89469	-10.7528	-32.0055	-37.0799	0	0	0	0	0	0	0	188.355	122.723	125.34
					5.90178	144.272	92.946	80.583	69.253	57.486	46.412	36.798	28.759	22.183	16.862	12.641	9.556	7.199	5.468	4.149	3.175	2.375	1.82	0	24.9087	15.589	85.5794	70.145	42.862	26.5045	3.90242	-10.8378	-32.0187	-37.0447	0	0	0	0	0	0	0	189.59	123.539	126.155
					5.92262	144.286	92.536	81.109	69.44	57.383	46.56	37.086	28.882	22.291	16.876	12.808	9.606	7.247	5.491	4.187	3.193	2.458	1.867	0	24.7988	15.6908	85.8105	70.0193	42.9987	26.7119	3.91911	-10.8906	-32.0453	-37.5341	0	0	0	0	0	0	0	189.479	123.466	126.082
					5.94345	144.286	92.775	81.354	69.374	57.596	46.771	37.254	29.193	22.49	17.004	12.995	9.771	7.393	5.618	4.31	3.3	2.547	1.938	0	24.8629	15.7382	85.7289	70.2792	43.1936	26.8329	3.96131	-10.9878	-32.2884	-38.0821	0	0	0	0	0	0	0	189.239	123.307	125.923
					5.96428	144.284	92.845	81.496	69.38	57.848	47.036	37.73	29.298	22.67	17.353	13.024	9.987	7.521	5.733	4.382	3.384	2.553	1.969	0	24.8816	15.7656	85.7363	70.5867	43.4383	27.1758	3.97556	-11.0757	-32.9511	-38.1671	0	0	0	0	0	0	0	189.366	123.391	126.007
					5.98512	144.281	92.865	81.065	69.907	57.887	47.093	37.678	29.489	22.699	17.301	13.131	10.062	7.512	5.721	4.361	3.332	2.517	1.961	0	24.887	15.6823	86.3876	70.6343	43.491	27.1383	4.00148	-11.0899	-32.8523	-38.4807	0	0	0	0	0	0	0	189.799	123.677	126.293
					6.00595	144.276	92.929	81.129	69.555	58.023	47.446	37.612	29.547	22.803	17.452	13.231	10.01	7.586	5.744	4.379	3.386	2.58	1.984	0	24.9041	15.6946	85.9526	70.8002	43.817	27.0908	4.00935	-11.1407	-33.1391	-38.7737	0	0	0	0	0	0	0	189.215	123.291	125.908
					6.02678	144.27	92.995	81.179	69.788	58.107	47.304	37.751	29.652	23	17.379	13.281	10.015	7.585	5.721	4.393	3.356	2.548	1.961	0	24.9218	15.7043	86.2405	70.9027	43.6858	27.1909	4.0236	-11.237	-33.0005	-38.9202	0	0	0	0	0	0	0	189.512	123.487	126.104
					6.04762	144.263	93.121	81.802	69.909	58.201	47.388	37.906	29.698	22.89	17.573	13.3	10.044	7.588	5.739	4.369	3.332	2.551	1.945	0	24.9556	15.8248	86.39	71.0174	43.7634	27.3026	4.02984	-11.1832	-33.3688	-38.9759	0	0	0	0	0	0	0	189.756	123.648	126.265
					6.06845	144.255	92.614	81.878	69.57	58.273	47.658	37.997	29.725	22.936	17.576	13.271	10.024	7.55	5.692	4.363	3.311	2.466	1.844	0	24.8197	15.8395	85.9711	71.1053	44.0127	27.3681	4.0335	-11.2057	-33.3745	-38.8909	0	0	0	0	0	0	0	189.679	123.597	126.214
					6.08928	144.245	92.705	81.98	69.811	58.346	47.503	38.142	29.792	23.097	17.522	13.319	10.022	7.587	5.712	4.335	3.335	2.548	1.922	0	24.8441	15.8593	86.2689	71.1944	43.8696	27.4725	4.0426	-11.2844	-33.272	-39.0316	0	0	0	0	0	0	0	189.963	123.785	126.402
					6.11012	144.234	93.216	81.976	69.725	58.362	47.602	38.089	29.914	23.216	17.714	13.43	10.097	7.637	5.753	4.42	3.376	2.593	1.953	0	24.981	15.8585	86.1627	71.2139	43.961	27.4344	4.05915	-11.3425	-33.6366	-39.3569	0	0	0	0	0	0	0	189.335	123.37	125.987
					6.13095	144.222	93.378	81.67	70.255	58.599	47.779	38.285	30.12	23.164	17.752	13.513	10.213	7.716	5.761	4.353	3.361	2.47	1.906	0	25.0245	15.7993	86.8176	71.5031	44.1245	27.5755	4.0871	-11.3171	-33.7087	-39.6001	0	0	0	0	0	0	0	190.306	124.011	126.627
					6.15178	144.209	92.776	81.546	70.084	58.503	47.935	38.111	30.052	23.325	17.773	13.517	10.215	7.705	5.801	4.414	3.373	2.55	1.953	0	24.8631	15.7753	86.6063	71.3859	44.2685	27.4502	4.07788	-11.3958	-33.7486	-39.6118	0	0	0	0	0	0	0	189.671	123.592	126.209
					6.17262	144.194	93.468	81.735	70.473	58.729	47.895	38.393	30.158	23.44	17.883	13.658	10.286	7.811	5.896	4.496	3.437	2.616	2	0	25.0486	15.8119	87.087	71.6617	44.2316	27.6533	4.09226	-11.4519	-33.9575	-40.025	0	0	0	0	0	0	0	190.152	123.91	126.526
					6.19345	144.179	93.407	81.736	70.462	58.735	47.964	38.281	30.358	23.487	17.93	13.685	10.338	7.832	5.92	4.511	3.467	2.611	1.992	0	25.0322	15.8121	87.0734	71.669	44.2953	27.5727	4.1194	-11.4749	-34.0467	-40.1042	0	0	0	0	0	0	0	189.948	123.775	126.392
					6.21428	144.162	93.455	81.756	70.009	58.976	47.754	38.586	30.352	23.462	17.993	13.62	10.3	7.778	5.847	4.477	3.426	2.586	1.953	0	25.0451	15.8159	86.5136	71.9631	44.1014	27.7923	4.11858	-11.4627	-34.1664	-39.9137	0	0	0	0	0	0	0	189.807	123.682	126.299
					6.23512	144.144	93.709	82.414	70.177	58.844	48.037	38.64	30.264	23.514	18.055	13.661	10.334	7.81	5.845	4.482	3.391	2.592	1.953	0	25.1132	15.9432	86.7212	71.802	44.3627	27.8312	4.10664	-11.4881	-34.2841	-40.0338	0	0	0	0	0	0	0	190.074	123.858	126.475
					6.25595	144.125	93.034	82.334	70.108	58.851	48.038	38.644	30.291	23.534	18.019	13.737	10.374	7.811	5.898	4.491	3.417	2.599	1.977	0	24.9323	15.9278	86.636	71.8106	44.3637	27.8341	4.11031	-11.4979	-34.2157	-40.2566	0	0	0	0	0	0	0	189.645	123.575	126.191
					6.27678	144.105	93.104	82.354	70.195	58.853	48.034	38.522	30.476	23.59	18.055	13.699	10.431	7.833	5.882	4.473	3.461	2.624	2	0	24.951	15.9316	86.7435	71.813	44.36	27.7462	4.13541	-11.5252	-34.2841	-40.1452	0	0	0	0	0	0	0	189.726	123.629	126.245
					6.29762	144.084	93.068	82.348	70.274	58.883	48.082	38.537	30.45	23.578	18.026	13.782	10.422	7.827	5.928	4.451	3.392	2.594	1.953	0	24.9414	15.9305	86.8411	71.8496	44.4043	27.757	4.13188	-11.5194	-34.229	-40.3884	0	0	0	0	0	0	0	189.719	123.624	126.24
					6.31845	144.062	92.905	81.753	70.072	58.875	48.07	38.559	30.468	23.57	18.113	13.702	10.432	7.836	5.897	4.459	3.362	2.587	1.961	0	24.8977	15.8154	86.5915	71.8399	44.3932	27.7729	4.13432	-11.5155	-34.3942	-40.154	0	0	0	0	0	0	0	189.381	123.401	126.017
					6.33928	144.039	92.615	81.519	70.266	58.725	47.962	38.461	30.344	23.605	18.051	13.809	10.372	7.864	5.911	4.508	3.43	2.546	1.898	0	24.82	15.7701	86.8312	71.6568	44.2935	27.7023	4.1175	-11.5326	-34.2765	-40.4676	0	0	0	0	0	0	0	188.915	123.093	125.71
					6.36012	144.015	92.507	81.535	70.262	58.549	48.099	38.625	30.399	23.657	18.172	13.816	10.48	7.901	5.94	4.54	3.442	2.617	1.969	0	24.791	15.7732	86.8263	71.4421	44.42	27.8204	4.12496	-11.558	-34.5063	-40.4881	0	0	0	0	0	0	0	188.646	122.915	125.532
					6.38095	143.99	92.164	81.199	69.812	58.378	47.945	38.426	30.351	23.501	18.152	13.766	10.488	7.885	5.969	4.512	3.44	2.623	1.984	0	24.6991	15.7082	86.2702	71.2334	44.2778	27.6771	4.11845	-11.4817	-34.4683	-40.3415	0	0	0	0	0	0	0	187.693	122.286	124.903
					6.40178	143.964	92.068	81.302	69.822	58.366	47.823	38.528	30.505	23.843	18.247	13.893	10.605	8.057	6.064	4.663	3.55	2.722	2.047	0	24.6734	15.7281	86.2825	71.2188	44.1651	27.7506	4.13935	-11.6488	-34.6487	-40.7137	0	0	0	0	0	0	0	186.947	121.794	124.411
					6.42262	143.938	92.067	81.278	69.537	58.736	47.839	38.553	30.538	23.794	18.299	13.961	10.621	8.003	6.09	4.634	3.57	2.748	2.078	0	24.6731	15.7235	85.9303	71.6703	44.1799	27.7686	4.14382	-11.6249	-34.7474	-40.913	0	0	0	0	0	0	0	186.804	121.7	124.317
					6.44346	143.91	91.628	81.314	69.605	58.578	48.156	38.647	30.566	23.828	18.259	14.037	10.599	8.009	6.083	4.602	3.537	2.705	2.063	0	24.5555	15.7304	86.0144	71.4775	44.4726	27.8363	4.14762	-11.6415	-34.6715	-41.1357	0	0	0	0	0	0	0	186.786	121.688	124.304
					6.46429	143.882	91.505	81.097	69.882	58.47	47.765	38.64	30.601	23.816	18.499	14.014	10.681	8.032	6.102	4.679	3.565	2.721	2.078	0	24.5225	15.6885	86.3567	71.3457	44.1116	27.8312	4.15237	-11.6356	-35.1272	-41.0683	0	0	0	0	0	0	0	186.177	121.286	123.903
					6.48513	143.852	91.558	81.209	69.626	58.574	48.183	38.628	30.681	23.933	18.428	14.067	10.704	8.097	6.138	4.71	3.595	2.736	2.031	0	24.5367	15.7101	86.0403	71.4726	44.4976	27.8226	4.16323	-11.6928	-34.9924	-41.2236	0	0	0	0	0	0	0	186.334	121.39	124.006
					6.50596	143.822	91.626	81.218	69.537	58.609	48.247	38.69	30.749	23.963	18.472	14.077	10.741	8.117	6.147	4.658	3.605	2.759	2.094	0	24.5549	15.7119	85.9303	71.5153	44.5567	27.8672	4.17245	-11.7075	-35.0759	-41.2529	0	0	0	0	0	0	0	186.273	121.349	123.966
					6.52679	143.791	91.989	80.628	69.907	58.365	48.005	38.959	30.719	23.984	18.458	14.144	10.754	8.156	6.168	4.668	3.491	2.716	2.047	0	24.6522	15.5977	86.3876	71.2176	44.3332	28.061	4.16838	-11.7177	-35.0493	-41.4493	0	0	0	0	0	0	0	186.201	121.302	123.919
					6.54763	143.76	91.696	80.533	69.512	58.621	48.08	38.832	30.838	24.12	18.611	14.209	10.829	8.222	6.209	4.778	3.652	2.797	2.078	0	24.5737	15.5794	85.8995	71.5299	44.4025	27.9695	4.18453	-11.7842	-35.3399	-41.6398	0	0	0	0	0	0	0	185.375	120.757	123.373
					6.56846	143.727	91.98	80.585	69.607	58.614	48.034	38.789	30.847	24.117	18.586	14.23	10.823	8.273	6.275	4.721	3.628	2.773	2.125	0	24.6498	15.5894	86.0169	71.5214	44.36	27.9386	4.18575	-11.7827	-35.2924	-41.7013	0	0	0	0	0	0	0	185.485	120.83	123.446
					6.58929	143.694	91.834	80.597	69.989	58.397	48.09	38.841	30.759	24.195	18.555	14.215	10.853	8.289	6.304	4.807	3.717	2.8	2.141	0	24.6107	15.5917	86.4889	71.2566	44.4117	27.976	4.17381	-11.8208	-35.2335	-41.6573	0	0	0	0	0	0	0	185.798	121.036	123.652
					6.61013	143.66	91.818	80.565	69.853	58.335	48.141	38.921	30.808	24.208	18.679	14.349	10.883	8.367	6.336	4.861	3.742	2.879	2.203	0	24.6064	15.5855	86.3208	71.181	44.4588	28.0336	4.18046	-11.8272	-35.469	-42.05	0	0	0	0	0	0	0	185.02	120.523	123.139
					6.63096	143.626	91.889	80.658	69.649	58.683	48.156	38.909	30.955	24.224	18.654	14.426	10.921	8.198	6.348	4.875	3.75	2.833	2.156	0	24.6254	15.6035	86.0688	71.6056	44.4726	28.025	4.20041	-11.835	-35.4215	-42.2757	0	0	0	0	0	0	0	185.069	120.555	123.171
					6.65179	143.591	91.53	81.21	69.712	58.714	48.214	38.869	30.919	24.234	18.718	14.327	10.972	8.344	6.291	4.826	3.742	2.889	2.172	0	24.5292	15.7103	86.1466	71.6434	44.5262	27.9962	4.19552	-11.8399	-35.543	-41.9856	0	0	0	0	0	0	0	185.379	120.759	123.376
					6.67263	143.555	91.847	80.615	69.604	58.738	48.221	38.751	31.056	24.323	18.816	14.478	10.896	8.387	6.398	4.864	3.693	2.819	2.188	0	24.6142	15.5952	86.0131	71.6727	44.5327	27.9112	4.21411	-11.8833	-35.7291	-42.4281	0	0	0	0	0	0	0	184.513	120.188	122.804
					6.69346	143.519	91.59	81.289	69.789	58.728	48.225	38.893	30.947	24.362	18.87	14.484	11.004	8.451	6.394	4.93	3.754	2.878	2.203	0	24.5453	15.7256	86.2418	71.6605	44.5364	28.0135	4.19932	-11.9024	-35.8317	-42.4457	0	0	0	0	0	0	0	184.743	120.339	122.956
					6.71429	143.482	91.985	80.772	69.832	58.579	48.312	39.161	31.125	24.285	18.905	14.562	11.035	8.381	6.432	4.872	3.699	2.878	2.203	0	24.6512	15.6256	86.2949	71.4787	44.6167	28.2065	4.22348	-11.8648	-35.8981	-42.6742	0	0	0	0	0	0	0	184.66	120.285	122.901
					6.73513	143.444	91.594	81.357	69.793	58.576	48.338	39.22	31.054	24.43	18.982	14.551	11.123	8.399	6.47	4.95	3.763	2.891	2.219	0	24.5464	15.7388	86.2467	71.475	44.6407	28.249	4.21384	-11.9356	-36.0444	-42.642	0	0	0	0	0	0	0	184.488	120.172	122.788
					6.75596	143.406	91.635	81.303	69.504	58.751	48.356	39.009	31.171	24.392	18.987	14.5	11.046	8.429	6.433	4.929	3.794	2.879	2.203	0	24.5574	15.7283	85.8896	71.6886	44.6573	28.097	4.22972	-11.9171	-36.0538	-42.4925	0	0	0	0	0	0	0	184.384	120.103	122.719
					6.77679	143.368	91.582	81.356	69.88	58.729	48.073	39.156	31.094	24.499	18.85	14.496	11.035	8.442	6.454	4.96	3.821	2.929	2.234	0	24.5432	15.7386	86.3542	71.6617	44.396	28.2029	4.21927	-11.9693	-35.7937	-42.4808	0	0	0	0	0	0	0	184.872	120.425	123.041
					6.79763	143.329	91.593	81.261	69.533	58.89	48.399	39.148	31.249	24.405	19.029	14.686	11.156	8.561	6.527	4.991	3.855	2.957	2.25	0	24.5461	15.7202	85.9254	71.8582	44.6971	28.1971	4.2403	-11.9234	-36.1336	-43.0376	0	0	0	0	0	0	0	184.09	119.909	122.525
					6.81846	143.289	92.265	81.337	69.86	58.627	48.368	39.113	31.159	24.544	19.089	14.636	11.232	8.453	6.529	4.954	3.812	2.885	2.188	0	24.7262	15.7349	86.3295	71.5373	44.6684	28.1719	4.22809	-11.9913	-36.2475	-42.8911	0	0	0	0	0	0	0	184.266	120.025	122.642
					6.83929	143.249	92.261	81.413	69.853	58.633	48.434	39.185	31.146	24.62	18.973	14.586	11.168	8.562	6.523	5.03	3.812	2.959	2.266	0	24.7251	15.7496	86.3208	71.5446	44.7294	28.2238	4.22633	-12.0284	-36.0273	-42.7446	0	0	0	0	0	0	0	184.719	120.324	122.941
					6.86013	143.209	92.2	81.419	69.662	58.761	48.508	39.31	31.333	24.618	19.056	14.699	11.252	8.578	6.586	5.035	3.895	3.012	2.281	0	24.7088	15.7507	86.0848	71.7008	44.7977	28.3138	4.2517	-12.0275	-36.1849	-43.0757	0	0	0	0	0	0	0	184.32	120.061	122.677
					6.88096	143.168	92.305	81.346	69.56	58.896	48.401	39.133	31.135	24.507	19.043	14.634	11.227	8.61	6.559	5.012	3.888	2.965	2.266	0	24.7369	15.7366	85.9588	71.8655	44.6989	28.1863	4.22483	-11.9732	-36.1602	-42.8852	0	0	0	0	0	0	0	184.389	120.106	122.723
					6.90179	143.127	92.201	81.438	69.662	58.974	48.444	39.118	31.154	24.553	19.016	14.749	11.195	8.648	6.552	5.06	3.877	2.988	2.266	0	24.709	15.7544	86.0848	71.9607	44.7386	28.1755	4.22741	-11.9957	-36.1089	-43.2222	0	0	0	0	0	0	0	184.324	120.063	122.679
					6.92263	143.084	92.243	81.04	70.098	58.963	48.255	39.331	31.338	24.526	19.23	14.72	11.308	8.573	6.601	5.07	3.892	3.031	2.297	0	24.7203	15.6774	86.6236	71.9472	44.5641	28.3289	4.25238	-11.9825	-36.5153	-43.1373	0	0	0	0	0	0	0	184.479	120.165	122.782
					6.94346	143.035	92.303	81.471	69.615	58.807	48.409	39.072	31.26	24.663	19.16	14.798	11.262	8.656	6.585	5.043	3.941	3.007	2.344	0	24.7364	15.7608	86.0267	71.7569	44.7063	28.1424	4.24179	-12.0495	-36.3823	-43.3658	0	0	0	0	0	0	0	183.574	119.568	122.184
					6.96429	142.981	92.245	81.372	69.587	58.918	48.414	39.063	31.36	24.568	19.195	14.822	11.489	8.693	6.714	4.999	3.979	3.008	2.328	0	24.7208	15.7417	85.9921	71.8923	44.7109	28.1359	4.25536	-12.003	-36.4488	-43.4362	0	0	0	0	0	0	0	183.561	119.56	122.176
					6.98513	142.921	92.256	81.376	69.557	58.918	48.484	39.085	31.323	24.745	19.153	14.837	11.438	8.764	6.722	5.189	4.013	3.077	2.375	0	24.7238	15.7424	85.9551	71.8923	44.7756	28.1518	4.25034	-12.0895	-36.3691	-43.4801	0	0	0	0	0	0	0	183.553	119.554	122.17
					7.00596	142.857	92.33	81.47	69.58	58.843	48.388	39.005	31.36	24.535	19.178	14.76	11.413	8.72	6.66	5.132	3.953	3.044	2.328	0	24.7436	15.7606	85.9835	71.8008	44.6869	28.0941	4.25536	-11.9869	-36.4165	-43.2545	0	0	0	0	0	0	0	183.667	119.63	122.246
					7.02679	142.787	92.058	81.301	69.723	58.539	48.303	39.213	31.007	24.502	19.183	14.781	11.32	8.741	6.633	5.117	3.882	3.055	2.328	0	24.6707	15.7279	86.1602	71.4299	44.6084	28.2439	4.20746	-11.9708	-36.426	-43.316	0	0	0	0	0	0	0	183.336	119.411	122.027
					7.04763	142.712	92.149	81.286	69.678	58.594	48.404	39.111	31.2	24.507	19.202	14.794	11.348	8.683	6.638	5.165	3.97	3.06	2.328	0	24.6951	15.725	86.1046	71.497	44.7017	28.1705	4.23365	-11.9732	-36.4621	-43.3541	0	0	0	0	0	0	0	183.338	119.412	122.029
					7.06846	142.633	92.309	81.371	69.786	58.545	48.354	39.119	31.204	24.571	19.092	14.749	11.303	8.628	6.635	5.11	3.932	3.009	2.25	0	24.738	15.7415	86.238	71.4372	44.6555	28.1762	4.2342	-12.0045	-36.2532	-43.2222	0	0	0	0	0	0	0	183.741	119.678	122.295
					7.08931	142.549	91.641	81.23	69.595	58.686	48.24	38.972	31.049	24.51	19.185	14.787	11.315	8.747	6.638	5.098	3.953	2.997	2.297	0	24.559	15.7142	86.002	71.6092	44.5502	28.0704	4.21316	-11.9747	-36.4298	-43.3336	0	0	0	0	0	0	0	182.98	119.176	121.793
					7.11014	142.46	92.167	81.24	69.624	58.702	48.018	39.185	31.003	24.594	19.073	14.81	11.373	8.675	6.649	5.144	3.962	3.051	2.328	0	24.6999	15.7161	86.0379	71.6288	44.3452	28.2238	4.20692	-12.0157	-36.2171	-43.401	0	0	0	0	0	0	0	183.225	119.338	121.954
					7.13097	142.367	92.484	80.967	69.206	58.293	48.143	38.802	31.091	24.414	19.068	14.723	11.289	8.631	6.636	5.103	3.953	2.975	2.297	0	24.7849	15.6633	85.5213	71.1297	44.4606	27.9479	4.21886	-11.9278	-36.2077	-43.146	0	0	0	0	0	0	0	182.445	118.823	121.44
					7.15181	142.27	92.15	81.228	69.862	58.325	48.119	38.962	30.878	24.416	19.026	14.693	11.365	8.644	6.633	5.102	3.924	3.034	2.313	0	24.6954	15.7138	86.332	71.1687	44.4385	28.0632	4.18996	-11.9288	-36.1279	-43.0581	0	0	0	0	0	0	0	183.487	119.51	122.127
					7.17264	142.169	92.459	80.506	69.546	58.459	47.781	38.915	30.954	24.345	18.908	14.721	11.274	8.677	6.573	5.065	3.93	3.047	2.313	0	24.7782	15.5741	85.9415	71.3323	44.1263	28.0293	4.20027	-11.8941	-35.9038	-43.1402	0	0	0	0	0	0	0	183.044	119.218	121.835
					7.19347	142.064	92.473	80.994	69.091	58.475	47.776	38.815	30.752	24.384	19.125	14.665	11.282	8.635	6.686	5.114	3.935	3.006	2.344	0	24.7819	15.6685	85.3792	71.3518	44.1217	27.9573	4.17286	-11.9131	-36.3159	-42.9761	0	0	0	0	0	0	0	182.228	118.68	121.296
					7.21431	141.955	92.402	80.948	69.047	58.378	47.962	38.715	30.831	24.347	18.998	14.626	11.354	8.644	6.65	5.078	3.945	3.04	2.328	0	24.7629	15.6596	85.3248	71.2334	44.2935	27.8853	4.18358	-11.8951	-36.0747	-42.8618	0	0	0	0	0	0	0	182.512	118.867	121.483
					7.23514	141.842	92.495	80.902	69.383	58.085	47.888	38.628	30.802	24.304	18.915	14.675	11.199	8.636	6.675	5.062	3.933	3.02	2.313	0	24.7878	15.6507	85.74	70.8759	44.2251	27.8226	4.17965	-11.8741	-35.9171	-43.0054	0	0	0	0	0	0	0	182.485	118.85	121.466
					7.25597	141.725	92.372	80.845	69.26	58.005	47.847	38.666	30.66	24.064	18.752	14.501	11.192	8.566	6.579	5.044	3.9	2.99	2.297	0	24.7549	15.6397	85.588	70.7783	44.1873	27.85	4.16038	-11.7568	-35.6076	-42.4955	0	0	0	0	0	0	0	183.099	119.254	121.871
					7.27681	141.606	92.369	80.719	69.352	57.891	47.525	38.701	30.686	24.226	18.83	14.551	11.239	8.587	6.656	5.099	3.996	3.016	2.344	0	24.7541	15.6153	85.7017	70.6392	43.8899	27.8752	4.16391	-11.836	-35.7557	-42.642	0	0	0	0	0	0	0	182.406	118.797	121.413
					7.29764	141.483	91.817	80.708	69.338	57.884	47.712	38.321	30.653	24.204	18.842	14.553	11.141	8.614	6.539	5.062	3.878	3	2.25	0	24.6061	15.6132	85.6844	70.6306	44.0626	27.6015	4.15943	-11.8252	-35.7785	-42.6479	0	0	0	0	0	0	0	182.106	118.599	121.216
					7.31847	141.357	92.298	80.706	69.393	57.838	47.693	38.265	30.731	24.041	18.762	14.596	11.126	8.601	6.541	5.105	3.955	3.082	2.359	0	24.735	15.6128	85.7524	70.5745	44.0451	27.5611	4.17001	-11.7456	-35.6266	-42.7739	0	0	0	0	0	0	0	182.305	118.731	121.347
					7.33931	141.227	92.271	80.67	69.016	57.964	47.332	38.291	30.586	24.034	18.812	14.541	11.158	8.598	6.57	5.035	3.942	2.978	2.281	0	24.7278	15.6059	85.2865	70.7283	43.7117	27.5799	4.15034	-11.7421	-35.7215	-42.6127	0	0	0	0	0	0	0	181.714	118.34	120.957
					7.36014	141.095	91.599	80.992	68.831	57.598	47.461	38.026	30.425	23.892	18.65	14.475	11.105	8.505	6.591	4.983	3.839	3.011	2.25	0	24.5477	15.6681	85.0579	70.2817	43.8308	27.389	4.12849	-11.6728	-35.4139	-42.4193	0	0	0	0	0	0	0	181.398	118.132	120.748
					7.38097	140.961	92.167	80.546	69.066	57.846	47.481	38.184	30.496	23.944	18.638	14.449	11.069	8.618	6.591	5.091	3.969	3.084	2.359	0	24.6999	15.5819	85.3483	70.5843	43.8493	27.5028	4.13812	-11.6982	-35.3911	-42.3431	0	0	0	0	0	0	0	182.272	118.709	121.325
					7.40181	140.823	92.171	80.892	68.842	57.507	47.364	38.191	30.267	23.881	18.639	14.401	11.074	8.601	6.578	5.064	3.945	3.03	2.297	0	24.701	15.6488	85.0715	70.1706	43.7412	27.5078	4.10705	-11.6674	-35.393	-42.2024	0	0	0	0	0	0	0	181.685	118.322	120.938
					7.42264	140.683	92.092	80.984	68.713	57.679	47.246	37.821	30.344	23.819	18.521	14.396	11.019	8.502	6.593	5.011	3.875	2.97	2.281	0	24.6798	15.6666	84.9121	70.3805	43.6322	27.2413	4.1175	-11.6371	-35.169	-42.1878	0	0	0	0	0	0	0	181.636	118.289	120.906
					7.44347	140.541	92.157	80.937	68.51	57.607	47.228	37.853	30.214	23.727	18.474	14.282	11.032	8.535	6.537	5.085	3.934	3.042	2.328	0	24.6972	15.6575	84.6612	70.2926	43.6156	27.2644	4.09986	-11.5922	-35.0797	-41.8537	0	0	0	0	0	0	0	181.763	118.373	120.989
					7.46431	140.397	92.171	80.889	68.972	57.325	47.198	37.917	30.154	23.768	18.588	14.356	11.011	8.546	6.534	5.063	3.912	3.031	2.328	0	24.701	15.6482	85.2321	69.9485	43.5879	27.3105	4.09172	-11.6122	-35.2962	-42.0705	0	0	0	0	0	0	0	181.541	118.226	120.843
					7.48514	140.251	91.958	80.189	68.571	57.396	46.991	37.734	29.973	23.52	18.431	14.302	10.989	8.486	6.495	5.009	3.866	3	2.297	0	24.6439	15.5128	84.7366	70.0352	43.3968	27.1787	4.06716	-11.491	-34.9981	-41.9123	0	0	0	0	0	0	0	181.17	117.981	120.598
					7.50597	140.102	92.024	80.702	68.519	57.303	46.873	37.728	29.835	23.394	18.28	14.185	10.819	8.415	6.423	4.996	3.829	2.995	2.266	0	24.6616	15.612	84.6724	69.9217	43.2878	27.1743	4.04843	-11.4295	-34.7113	-41.5694	0	0	0	0	0	0	0	181.668	118.31	120.927
					7.52681	139.952	92.137	80.805	68.635	57.36	46.995	37.713	29.954	23.517	18.498	14.215	10.966	8.453	6.475	5.014	3.902	3.027	2.328	0	24.6919	15.632	84.8157	69.9912	43.4004	27.1635	4.06458	-11.4896	-35.1253	-41.6573	0	0	0	0	0	0	0	181.487	118.191	120.807
					7.54764	139.801	92.447	80.067	68.817	57.181	46.557	37.67	29.774	23.404	18.371	14.072	10.915	8.417	6.467	4.978	3.85	2.976	2.234	0	24.775	15.4892	85.0406	69.7728	42.9959	27.1326	4.04015	-11.4344	-34.8841	-41.2383	0	0	0	0	0	0	0	181.69	118.324	120.941
					7.56847	139.648	92.064	80.657	68.798	57.112	46.729	37.281	29.754	23.462	18.162	14.095	10.828	8.403	6.416	4.993	3.861	3	2.281	0	24.6723	15.6033	85.0171	69.6886	43.1548	26.8524	4.03744	-11.4627	-34.4873	-41.3057	0	0	0	0	0	0	0	181.77	118.378	120.994
					7.58931	139.493	92.029	80.598	68.76	57.096	46.696	37.415	29.718	23.296	18.144	14.097	10.861	8.332	6.463	4.957	3.838	2.978	2.297	0	24.6629	15.5919	84.9702	69.6691	43.1243	26.9489	4.03255	-11.3816	-34.4531	-41.3115	0	0	0	0	0	0	0	181.854	118.433	121.049
					7.61014	139.337	92.162	80.673	68.689	57.072	46.658	37.362	29.694	23.285	18.178	14.092	10.827	8.38	6.444	4.953	3.873	2.987	2.281	0	24.6986	15.6064	84.8824	69.6398	43.0892	26.9107	4.0293	-11.3762	-34.5177	-41.2969	0	0	0	0	0	0	0	181.666	118.309	120.925
					7.63097	139.181	92.649	80.559	68.856	56.924	46.286	37.448	29.595	23.193	18.024	13.97	10.793	8.363	6.419	4.972	3.896	3.013	2.313	0	24.8291	15.5844	85.0888	69.4592	42.7457	26.9727	4.01586	-11.3313	-34.2252	-40.9394	0	0	0	0	0	0	0	182.2	118.661	121.278
					7.65181	139.023	92.022	80.974	68.361	56.867	46.459	37.091	29.573	23.186	18.105	13.96	10.772	8.313	6.465	4.958	3.83	2.995	2.313	0	24.6611	15.6647	84.4771	69.3897	42.9054	26.7155	4.01288	-11.3278	-34.379	-40.9101	0	0	0	0	0	0	0	181.209	118.008	120.624
					7.67264	138.864	92.424	80.418	68.198	56.968	46.007	37.104	29.36	22.98	17.792	13.828	10.695	8.262	6.326	4.866	3.765	2.867	2.203	0	24.7688	15.5571	84.2757	69.5129	42.488	26.7249	3.98398	-11.2272	-33.7847	-40.5232	0	0	0	0	0	0	0	181.776	118.382	120.998
					7.69347	138.705	92.027	80.855	68.145	56.99	46.054	37.222	29.308	23.057	17.877	13.915	10.714	8.302	6.347	4.9	3.802	2.935	2.25	0	24.6624	15.6416	84.2102	69.5398	42.5314	26.8099	3.97692	-11.2648	-33.9461	-40.7782	0	0	0	0	0	0	0	181.383	118.122	120.739
					7.71432	138.545	92.704	80.889	68.083	56.949	46.232	36.814	29.355	22.888	17.893	13.833	10.667	8.218	6.327	4.901	3.804	2.948	2.266	0	24.8438	15.6482	84.1336	69.4897	42.6958	26.516	3.9833	-11.1823	-33.9765	-40.5379	0	0	0	0	0	0	0	181.614	118.274	120.891
					7.73515	138.385	92.7	80.95	68.022	56.898	46.217	36.892	29.155	22.965	17.821	13.852	10.683	8.24	6.366	4.913	3.835	3.01	2.313	0	24.8428	15.66	84.0582	69.4275	42.682	26.5722	3.95616	-11.2199	-33.8398	-40.5936	0	0	0	0	0	0	0	181.546	118.229	120.846
					7.75598	138.224	92.651	80.914	68.391	56.518	46.084	36.962	29.082	22.873	17.728	13.71	10.546	8.173	6.293	4.89	3.771	2.91	2.25	0	24.8296	15.6531	84.5142	68.9638	42.5591	26.6226	3.94625	-11.1749	-33.6632	-40.1774	0	0	0	0	0	0	0	182.073	118.578	121.194
					7.77682	138.064	92.507	80.876	68.204	56.542	46.079	36.923	29.046	22.853	17.72	13.714	10.613	8.127	6.363	4.918	3.802	2.984	2.281	0	24.791	15.6457	84.2831	68.9931	42.5545	26.5945	3.94137	-11.1652	-33.648	-40.1892	0	0	0	0	0	0	0	181.801	118.398	121.014
					7.79765	137.903	92.662	80.867	68.147	56.704	45.997	36.533	29.008	22.85	17.696	13.693	10.571	8.236	6.337	4.942	3.861	2.987	2.281	0	24.8326	15.644	84.2127	69.1908	42.4788	26.3136	3.93621	-11.1637	-33.6024	-40.1276	0	0	0	0	0	0	0	181.715	118.341	120.958
					7.81848	137.743	92.698	80.892	68.216	56.699	45.969	36.711	28.974	22.662	17.682	13.718	10.582	8.235	6.341	4.894	3.826	2.979	2.266	0	24.8422	15.6488	84.2979	69.1847	42.4529	26.4418	3.9316	-11.0718	-33.5758	-40.2009	0	0	0	0	0	0	0	181.951	118.497	121.114
					7.83932	137.583	93.29	80.877	68.209	56.565	45.852	36.543	28.881	22.733	17.506	13.631	10.54	8.181	6.31	4.861	3.786	2.952	2.266	0	25.0009	15.6459	84.2893	69.0212	42.3449	26.3208	3.91898	-11.1065	-33.2416	-39.9459	0	0	0	0	0	0	0	182.248	118.693	121.309
					7.86015	137.423	93.297	80.895	68.109	56.541	45.832	36.722	28.829	22.522	17.506	13.609	10.437	8.003	6.257	4.853	3.791	2.941	2.297	0	25.0028	15.6494	84.1657	68.9919	42.3264	26.4498	3.91192	-11.0034	-33.2416	-39.8814	0	0	0	0	0	0	0	182.371	118.774	121.391
					7.88098	137.264	93.362	80.89	68.066	56.72	45.743	36.466	28.717	22.472	17.446	13.534	10.48	8.092	6.261	4.859	3.791	2.91	2.25	0	25.0202	15.6484	84.1126	69.2103	42.2442	26.2654	3.89672	-10.979	-33.1277	-39.6617	0	0	0	0	0	0	0	182.629	118.945	121.561
					7.90182	137.106	93.39	80.904	68.403	56.486	45.683	36.267	28.867	22.465	17.461	13.56	10.419	8.084	6.278	4.865	3.772	2.978	2.297	0	25.0277	15.6511	84.529	68.9248	42.1888	26.122	3.91708	-10.9756	-33.1562	-39.7379	0	0	0	0	0	0	0	182.491	118.853	121.47
					7.92265	136.945	93.373	80.915	68.136	56.526	45.976	36.442	28.693	22.431	17.444	13.527	10.441	8.176	6.259	4.885	3.824	2.959	2.297	0	25.0231	15.6532	84.1991	68.9736	42.4594	26.2481	3.89347	-10.959	-33.1239	-39.6411	0	0	0	0	0	0	0	182.726	119.008	121.625
					7.94348	136.778	93.367	80.862	68.431	56.39	45.669	36.361	28.68	22.439	17.431	13.532	10.453	8.158	6.333	4.931	3.84	3.004	2.344	0	25.0215	15.643	84.5636	68.8076	42.1759	26.1897	3.8917	-10.9629	-33.0992	-39.6558	0	0	0	0	0	0	0	182.575	118.909	121.525
					7.96432	136.603	93.003	81.434	68.389	56.374	45.625	36.284	28.669	22.423	17.468	13.456	10.468	8.091	6.262	4.899	3.808	2.971	2.328	0	24.924	15.7537	84.5117	68.7881	42.1352	26.1343	3.89021	-10.9551	-33.1695	-39.4331	0	0	0	0	0	0	0	182.58	118.912	121.528
					7.98515	136.422	93.609	81.456	68.433	56.387	45.597	36.476	28.614	22.257	17.429	13.494	10.4	8.1	6.254	4.913	3.828	3.003	2.344	0	25.0864	15.7579	84.5661	68.804	42.1094	26.2726	3.88275	-10.874	-33.0954	-39.5444	0	0	0	0	0	0	0	182.965	119.166	121.783
					8.00598	136.234	93.646	81.441	68.381	56.396	45.55	36.443	28.463	22.247	17.193	13.399	10.436	8.01	6.227	4.884	3.826	2.976	2.328	0	25.0963	15.755	84.5018	68.815	42.066	26.2488	3.86226	-10.8691	-32.6473	-39.266	0	0	0	0	0	0	0	183.563	119.561	122.177
					8.02682	136.04	93.733	81.097	68.979	56.349	45.516	36.296	28.554	22.282	17.331	13.429	10.321	8.06	6.215	4.825	3.798	2.973	2.313	0	25.1196	15.6885	85.2408	68.7576	42.0346	26.1429	3.87461	-10.8862	-32.9093	-39.354	0	0	0	0	0	0	0	183.709	119.657	122.274
					8.04765	135.84	93.651	81.442	68.409	56.322	45.742	36.126	28.456	22.231	17.238	13.367	10.352	8.031	6.243	4.846	3.855	2.974	2.328	0	25.0976	15.7552	84.5364	68.7247	42.2433	26.0205	3.86131	-10.8613	-32.7327	-39.1723	0	0	0	0	0	0	0	183.473	119.501	122.118
					8.06848	135.635	94.328	81.031	68.789	56.492	45.408	36.013	28.39	22.141	17.192	13.272	10.257	7.982	6.204	4.871	3.766	2.966	2.281	0	25.2791	15.6757	85.006	68.9321	41.9348	25.9391	3.85235	-10.8173	-32.6454	-38.8939	0	0	0	0	0	0	0	184.263	120.023	122.639
					8.08932	135.425	94.47	81.224	68.592	56.585	45.501	36.345	28.422	22.211	17.175	13.358	10.347	8.002	6.273	4.868	3.803	2.95	2.328	0	25.3171	15.713	84.7626	69.0456	42.0207	26.1782	3.85669	-10.8515	-32.6131	-39.1459	0	0	0	0	0	0	0	184.283	120.036	122.653
					8.11015	135.21	94.661	81.713	68.511	56.539	45.671	36.055	28.393	22.184	17.245	13.301	10.256	8.036	6.198	4.826	3.762	2.909	2.25	0	25.3683	15.8076	84.6625	68.9895	42.1777	25.9693	3.85276	-10.8383	-32.746	-38.9788	0	0	0	0	0	0	0	184.264	120.024	122.64
					8.13098	134.991	94.672	81.794	68.742	56.603	45.705	36.114	28.391	22.182	17.246	13.308	10.298	7.993	6.196	4.882	3.807	2.988	2.313	0	25.3712	15.8233	84.9479	69.0675	42.2091	26.0118	3.85249	-10.8373	-32.7479	-38.9994	0	0	0	0	0	0	0	184.699	120.311	122.927
					8.15182	134.767	94.875	81.866	68.835	56.582	45.651	36.062	28.475	22.032	17.188	13.253	10.319	8.025	6.248	4.859	3.816	2.973	2.313	0	25.4256	15.8372	85.0629	69.0419	42.1592	25.9744	3.86389	-10.764	-32.6378	-38.8382	0	0	0	0	0	0	0	185.125	120.592	123.208
					8.17265	134.54	94.94	81.854	68.637	56.539	45.583	36.031	28.27	22.063	17.017	13.197	10.236	7.91	6.162	4.782	3.744	2.893	2.297	0	25.4431	15.8349	84.8182	68.9895	42.0964	25.952	3.83607	-10.7792	-32.3131	-38.6741	0	0	0	0	0	0	0	185.204	120.644	123.26
					8.19348	134.31	94.944	81.925	68.837	56.657	45.716	36.06	28.5	22.027	17.186	13.263	10.319	8	6.236	4.862	3.802	2.982	2.328	0	25.4441	15.8486	85.0653	69.1334	42.2193	25.9729	3.86728	-10.7616	-32.634	-38.8675	0	0	0	0	0	0	0	185.288	120.699	123.316
					8.21432	134.077	95.08	82.033	69.45	56.604	45.588	36.215	28.357	22.085	17.063	13.209	10.151	7.986	6.165	4.842	3.712	2.914	2.281	0	25.4806	15.8695	85.8228	69.0688	42.1011	26.0846	3.84787	-10.7899	-32.4004	-38.7092	0	0	0	0	0	0	0	186.376	121.417	124.034
					8.23515	133.841	95.13	82.139	69.372	56.584	45.622	36.118	28.282	22.051	17.066	13.249	10.246	7.858	6.125	4.815	3.782	2.959	2.328	0	25.494	15.89	85.7264	69.0444	42.1325	26.0147	3.8377	-10.7733	-32.4061	-38.8265	0	0	0	0	0	0	0	186.134	121.258	123.874
					8.25598	133.602	95.264	82.173	69.489	56.609	45.638	36.126	28.257	22.071	17.049	13.233	10.201	7.958	6.186	4.837	3.797	2.939	2.313	0	25.5299	15.8966	85.871	69.0749	42.1472	26.0205	3.83431	-10.7831	-32.3738	-38.7796	0	0	0	0	0	0	0	186.438	121.458	124.075
					8.27682	133.362	95.937	82.272	69.084	56.91	45.674	36.131	28.311	22.083	17.118	13.214	10.301	7.952	6.232	4.899	3.832	3.008	2.297	0	25.7103	15.9158	85.3706	69.4422	42.1805	26.0241	3.84163	-10.789	-32.5049	-38.7239	0	0	0	0	0	0	0	186.467	121.478	124.094
					8.29765	133.12	95.394	82.337	69.21	56.944	45.653	36.084	28.325	21.917	17	13.212	10.197	7.963	6.157	4.847	3.811	2.951	2.328	0	25.5647	15.9283	85.5263	69.4836	42.1611	25.9902	3.84353	-10.7079	-32.2808	-38.718	0	0	0	0	0	0	0	186.791	121.691	124.308
					8.31848	132.877	95.607	82.919	69.295	56.936	45.688	36.082	28.363	21.993	16.942	13.162	10.221	7.931	6.148	4.833	3.787	2.965	2.281	0	25.6218	16.0409	85.6313	69.4739	42.1934	25.9888	3.84869	-10.745	-32.1707	-38.5715	0	0	0	0	0	0	0	187.312	122.035	124.651
					8.33932	132.633	95.67	82.529	69.971	56.753	45.928	36.051	28.36	21.886	17.044	13.136	10.197	7.944	6.191	4.867	3.777	2.939	2.313	0	25.6387	15.9655	86.4667	69.2506	42.4151	25.9665	3.84828	-10.6927	-32.3643	-38.4953	0	0	0	0	0	0	0	187.999	122.489	125.105
					8.36016	132.388	96.241	82.956	69.243	56.835	45.576	36.168	28.201	21.97	16.885	13.184	10.181	7.877	6.178	4.821	3.811	2.958	2.313	0	25.7917	16.0481	85.567	69.3506	42.09	26.0507	3.82671	-10.7338	-32.0624	-38.636	0	0	0	0	0	0	0	187.293	122.023	124.639
					8.381	132.143	96.464	82.664	69.652	57.056	45.998	36.24	28.316	22.066	17.002	13.206	10.233	7.881	6.094	4.663	3.705	2.91	2.234	0	25.8515	15.9916	86.0725	69.6203	42.4797	26.1026	3.84231	-10.7807	-32.2846	-38.7004	0	0	0	0	0	0	0	188.195	122.618	125.234
					8.40183	131.899	96.492	82.723	69.658	57.032	45.96	36.15	28.372	21.879	17.062	13.134	10.131	7.918	6.16	4.863	3.786	2.982	2.328	0	25.859	16.003	86.0799	69.591	42.4446	26.0378	3.84991	-10.6893	-32.3985	-38.4894	0	0	0	0	0	0	0	188.288	122.679	125.296
					8.42266	131.654	96.747	83.379	69.534	57.442	45.825	36.264	28.459	21.95	16.982	13.068	10.176	7.889	6.153	4.842	3.784	2.994	2.328	0	25.9273	16.1299	85.9266	70.0913	42.3199	26.1199	3.86172	-10.724	-32.2466	-38.296	0	0	0	0	0	0	0	189.11	123.222	125.838
					8.4435	131.411	96.901	83.378	69.967	57.136	45.767	36.275	28.386	22.046	17.119	13.137	10.229	7.935	6.13	4.834	3.775	2.96	2.297	0	25.9686	16.1297	86.4617	69.7179	42.2664	26.1278	3.85181	-10.7709	-32.5068	-38.4982	0	0	0	0	0	0	0	188.748	122.983	125.599
					8.46433	131.169	96.937	83.481	69.668	57.254	46.105	36.309	28.447	22.08	17.085	13.24	10.196	7.988	6.208	4.854	3.817	2.985	2.281	0	25.9782	16.1496	86.0922	69.8619	42.5785	26.1523	3.86009	-10.7875	-32.4422	-38.8001	0	0	0	0	0	0	0	188.643	122.914	125.53
					8.48516	130.928	97.286	83.794	70.08	57.653	46.185	36.304	28.518	22.233	17.01	13.261	10.311	7.967	6.211	4.877	3.887	3.04	2.391	0	26.0718	16.2102	86.6014	70.3488	42.6524	26.1487	3.86972	-10.8622	-32.2998	-38.8616	0	0	0	0	0	0	0	189.879	123.73	126.346
					8.506	130.689	97.334	83.772	70.44	57.311	46.177	36.382	28.466	22.09	17.051	13.218	10.24	7.94	6.193	4.874	3.791	2.978	2.328	0	26.0846	16.2059	87.0462	69.9315	42.645	26.2049	3.86267	-10.7924	-32.3776	-38.7356	0	0	0	0	0	0	0	190.075	123.859	126.475
					8.52683	130.452	97.451	83.842	70.175	57.718	46.207	36.397	28.382	22.041	17.087	13.182	10.181	7.851	6.157	4.841	3.782	2.985	2.328	0	26.116	16.2195	86.7188	70.4281	42.6727	26.2157	3.85127	-10.7684	-32.446	-38.6301	0	0	0	0	0	0	0	190.377	124.058	126.675
					8.54766	130.217	97.355	83.839	70.161	57.671	46.002	36.58	28.544	22.147	17.19	13.238	10.22	7.989	6.194	4.858	3.803	2.993	2.344	0	26.0903	16.2189	86.7015	70.3707	42.4834	26.3475	3.87325	-10.8202	-32.6416	-38.7942	0	0	0	0	0	0	0	189.829	123.697	126.313
					8.5685	129.986	97.691	84.108	70.993	57.557	46.305	36.601	28.559	22.249	17.09	13.196	10.225	7.929	6.174	4.869	3.803	3.013	2.297	0	26.1803	16.2709	87.7296	70.2316	42.7632	26.3626	3.87528	-10.8701	-32.4517	-38.6711	0	0	0	0	0	0	0	191.421	124.747	127.363
					8.58933	129.758	97.699	84.04	70.941	57.747	46.076	36.591	28.551	22.14	17.152	13.263	10.263	8.05	6.251	4.93	3.86	3.037	2.344	0	26.1825	16.2578	87.6653	70.4635	42.5517	26.3554	3.8742	-10.8168	-32.5694	-38.8675	0	0	0	0	0	0	0	191.097	124.533	127.15
					8.61016	129.533	97.764	84.107	70.511	57.83	46.332	36.612	28.533	22.237	17.082	13.2	10.203	7.963	6.167	4.85	3.798	3	2.344	0	26.1999	16.2708	87.134	70.5647	42.7882	26.3705	3.87176	-10.8642	-32.4365	-38.6829	0	0	0	0	0	0	0	191.216	124.612	127.228
					8.631	129.312	98.496	84.375	70.852	57.916	46.354	36.565	28.721	22.211	17.069	13.155	10.125	7.916	6.171	4.828	3.796	2.9	2.281	0	26.396	16.3226	87.5554	70.6697	42.8085	26.3367	3.89727	-10.8515	-32.4118	-38.551	0	0	0	0	0	0	0	192.172	125.243	127.859
					8.65183	129.096	98.111	84.89	70.963	57.928	46.387	36.532	28.725	22.195	17.206	13.272	10.298	7.988	6.197	4.861	3.729	2.952	2.313	0	26.2929	16.4222	87.6925	70.6843	42.839	26.3129	3.89781	-10.8437	-32.672	-38.8939	0	0	0	0	0	0	0	191.732	124.952	127.569
					8.67266	128.884	98.349	84.558	71.311	58.125	46.605	36.828	28.863	22.258	17.372	13.304	10.25	7.896	6.243	4.828	3.855	2.997	2.313	0	26.3566	16.358	88.1226	70.9247	43.0403	26.5261	3.91654	-10.8745	-32.9872	-38.9876	0	0	0	0	0	0	0	192.396	125.39	128.007
					8.6935	128.677	98.813	84.533	71.388	58.144	46.632	36.78	28.811	22.353	17.135	13.367	10.355	8.037	6.262	4.911	3.862	2.969	2.344	0	26.481	16.3532	88.2177	70.9479	43.0652	26.4915	3.90948	-10.9209	-32.5371	-39.1723	0	0	0	0	0	0	0	192.836	125.681	128.297
					8.71433	128.475	98.661	85.265	71.082	58.277	46.954	36.881	28.839	22.276	17.308	13.375	10.259	7.895	6.187	4.833	3.839	3.01	2.344	0	26.4403	16.4948	87.8396	71.1102	43.3626	26.5643	3.91328	-10.8833	-32.8656	-39.1957	0	0	0	0	0	0	0	192.78	125.644	128.261
					8.73516	128.279	98.6	85.436	71.452	58.41	46.831	37.24	28.998	22.424	17.441	13.442	10.453	8.139	6.318	4.945	3.861	3.015	2.359	0	26.4239	16.5279	88.2968	71.2725	43.249	26.8229	3.93485	-10.9556	-33.1182	-39.392	0	0	0	0	0	0	0	193.062	125.83	128.447
					8.756	128.089	98.6	85.307	71.321	58.4	46.814	37.214	28.876	22.521	17.44	13.479	10.434	8.028	6.289	4.931	3.856	3.021	2.344	0	26.4239	16.5029	88.1349	71.2603	43.2333	26.8041	3.9183	-11.0029	-33.1163	-39.5005	0	0	0	0	0	0	0	192.658	125.564	128.18
					8.77683	127.905	98.8	85.496	71.475	58.464	46.863	37.047	29.067	22.411	17.362	13.369	10.292	8.095	6.303	4.888	3.839	2.999	2.328	0	26.4775	16.5395	88.3252	71.3384	43.2785	26.6838	3.94422	-10.9492	-32.9682	-39.1781	0	0	0	0	0	0	0	193.492	126.114	128.73
					8.79766	127.728	99.36	85.178	71.85	58.619	47.192	37.028	29.031	22.562	17.487	13.479	10.437	8.116	6.296	4.906	3.861	3.017	2.328	0	26.6276	16.4779	88.7886	71.5275	43.5824	26.6702	3.93933	-11.023	-33.2055	-39.5005	0	0	0	0	0	0	0	193.885	126.373	128.99
					8.8185	127.558	99.166	85.965	71.884	58.776	47.363	37.439	29.212	22.702	17.57	13.598	10.461	8.128	6.346	4.983	3.874	3.012	2.344	0	26.5756	16.6302	88.8307	71.7191	43.7403	26.9662	3.96389	-11.0914	-33.3631	-39.8492	0	0	0	0	0	0	0	194.122	126.53	129.146
					8.83933	127.395	99.398	85.252	71.528	58.933	47.099	37.391	29.197	22.661	17.555	13.532	10.439	8.147	6.321	4.906	3.852	3.002	2.344	0	26.6378	16.4923	88.3907	71.9106	43.4965	26.9316	3.96186	-11.0713	-33.3347	-39.6558	0	0	0	0	0	0	0	193.76	126.291	128.907
					8.86016	127.24	99.895	85.524	72.11	59.09	47.478	37.376	29.329	22.786	17.626	13.695	10.622	8.243	6.381	5.023	3.913	3.071	2.328	0	26.771	16.5449	89.1099	72.1022	43.8465	26.9208	3.97977	-11.1324	-33.4695	-40.1335	0	0	0	0	0	0	0	194.54	126.805	129.422
					8.881	127.093	99.823	85.962	71.898	58.888	47.251	37.578	29.401	22.989	17.633	13.702	10.564	8.294	6.394	5.018	3.919	3.065	2.375	0	26.7517	16.6296	88.848	71.8557	43.6369	27.0663	3.98954	-11.2316	-33.4828	-40.154	0	0	0	0	0	0	0	193.909	126.389	129.006
					8.90183	126.954	99.996	85.751	72.488	59.151	47.697	37.552	29.585	22.905	17.795	13.764	10.642	8.232	6.396	4.97	3.965	3.082	2.469	0	26.798	16.5888	89.577	72.1766	44.0488	27.0476	4.01451	-11.1906	-33.7904	-40.3357	0	0	0	0	0	0	0	194.935	127.066	129.683
					8.92266	126.823	99.558	86.16	72.345	59.056	47.632	37.707	29.455	22.996	17.678	13.718	10.588	8.292	6.449	5.061	3.931	3.036	2.281	0	26.6806	16.6679	89.4003	72.0607	43.9887	27.1592	3.99687	-11.235	-33.5682	-40.2009	0	0	0	0	0	0	0	194.95	127.077	129.693
					8.9435	126.697	99.789	86.439	72.47	59.34	47.921	37.834	29.699	23.058	17.972	13.816	10.816	8.424	6.512	5.101	3.972	3.104	2.391	0	26.7426	16.7219	89.5548	72.4073	44.2556	27.2507	4.02998	-11.2653	-34.1265	-40.4881	0	0	0	0	0	0	0	195.083	127.164	129.78
					8.96433	126.576	100.333	86.078	72.664	59.733	47.902	37.804	29.727	23.037	17.892	13.907	10.692	8.349	6.448	5.101	4.006	3.147	2.453	0	26.8883	16.652	89.7945	72.8868	44.2381	27.2291	4.03378	-11.255	-33.9746	-40.7547	0	0	0	0	0	0	0	195.738	127.597	130.213
					8.98517	126.46	100.327	86.198	72.613	59.851	48.136	38.167	29.981	23.278	18.245	14.078	10.975	8.509	6.648	5.198	4.091	3.162	2.469	0	26.8867	16.6753	89.7315	73.0308	44.4542	27.4905	4.06824	-11.3728	-34.6449	-41.2559	0	0	0	0	0	0	0	195.064	127.151	129.768
					9.00601	126.348	100.733	86.919	72.758	59.773	48.303	38.308	30.011	23.407	18.204	14.013	10.935	8.382	6.579	5.049	3.953	3.055	2.406	0	26.9955	16.8147	89.9107	72.9356	44.6084	27.5921	4.07231	-11.4358	-34.567	-41.0654	0	0	0	0	0	0	0	195.861	127.678	130.294
					9.02684	126.24	100.155	86.857	72.827	59.975	48.036	38.465	30.096	23.481	18.202	14.185	10.981	8.558	6.635	5.192	4.037	3.192	2.469	0	26.8406	16.8027	89.996	73.1821	44.3618	27.7052	4.08385	-11.472	-34.5632	-41.5694	0	0	0	0	0	0	0	195.368	127.352	129.968
					9.04767	126.136	97.968	84.006	71.455	58.095	46.898	37.149	29.235	22.634	17.674	13.634	10.58	8.233	6.353	4.958	3.83	2.99	2.297	0	26.2545	16.2512	88.3005	70.8881	43.3109	26.7573	3.96701	-11.0582	-33.5606	-39.9547	0	0	0	0	0	0	0	191.156	124.572	127.189
					9.06851	126.035	98.814	85.116	71.588	58.801	47.46	37.257	29.397	22.897	17.831	13.758	10.731	8.283	6.441	5.053	3.876	3.04	2.344	0	26.4813	16.4659	88.4649	71.7496	43.8299	26.8351	3.989	-11.1866	-33.8588	-40.3181	0	0	0	0	0	0	0	192.452	125.428	128.044
					9.08934	125.938	99.366	85.701	72.069	59.44	47.617	37.883	29.71	23.001	17.925	13.836	10.751	8.41	6.519	5.109	3.989	3.167	2.438	0	26.6292	16.5791	89.0593	72.5293	43.9749	27.286	4.03147	-11.2375	-34.0372	-40.5467	0	0	0	0	0	0	0	194.268	126.626	129.243
					9.11017	125.845	99.789	86.097	72.838	59.546	48.143	38.075	29.943	23.323	18.011	14.056	10.864	8.384	6.549	5.109	4.001	3.153	2.453	0	26.7426	16.6557	90.0096	72.6586	44.4606	27.4243	4.06309	-11.3948	-34.2005	-41.1914	0	0	0	0	0	0	0	195.228	127.26	129.876
					9.13101	125.754	99.783	86.109	72.935	59.626	48.236	38.198	29.902	23.444	18.184	14.107	10.891	8.561	6.617	5.16	4.034	3.123	2.438	0	26.7409	16.658	90.1294	72.7562	44.5465	27.5129	4.05752	-11.4539	-34.5291	-41.3408	0	0	0	0	0	0	0	195.078	127.161	129.777
					9.15184	125.666	100.434	86.294	72.692	59.994	48.058	38.322	30.106	23.443	18.146	14.167	10.976	8.443	6.506	5.095	4.006	3.13	2.391	0	26.9154	16.6938	89.8291	73.2053	44.3821	27.6022	4.0852	-11.4534	-34.4569	-41.5167	0	0	0	0	0	0	0	195.286	127.298	129.915
					9.17267	125.58	100.402	86.317	72.894	59.855	48.323	38.431	30.111	23.452	18.187	14.077	10.953	8.515	6.573	5.101	3.943	3.017	2.344	0	26.9068	16.6983	90.0788	73.0357	44.6269	27.6807	4.08588	-11.4578	-34.5347	-41.2529	0	0	0	0	0	0	0	195.868	127.682	130.298
					9.19351	125.497	99.955	86.002	73.155	60.235	48.3	38.579	30.32	23.607	18.231	14.186	10.952	8.611	6.63	5.175	3.986	3.136	2.438	0	26.787	16.6373	90.4013	73.4993	44.6056	27.7873	4.11424	-11.5335	-34.6183	-41.5724	0	0	0	0	0	0	0	196.108	127.841	130.457
					9.21434	125.415	99.583	86.603	73.087	60.472	48.521	38.752	30.505	23.758	18.538	14.391	11.143	8.581	6.657	5.23	4.06	3.109	2.469	0	26.6873	16.7536	90.3173	73.7885	44.8097	27.9119	4.13935	-11.6073	-35.2013	-42.1731	0	0	0	0	0	0	0	195.426	127.39	130.007
					9.23517	125.335	100.335	86.818	73.483	60.412	48.761	39.064	30.678	23.985	18.591	14.39	11.181	8.64	6.682	5.186	4.124	3.205	2.516	0	26.8889	16.7952	90.8066	73.7153	45.0314	28.1366	4.16282	-11.7182	-35.3019	-42.1702	0	0	0	0	0	0	0	196.347	127.998	130.614
					9.25601	125.257	100.28	86.862	73.452	60.255	49.197	38.839	30.747	23.879	18.675	14.444	11.237	8.675	6.732	5.223	4.077	3.203	2.469	0	26.8741	16.8037	90.7683	73.5238	45.434	27.9746	4.17218	-11.6664	-35.4614	-42.3284	0	0	0	0	0	0	0	196.094	127.832	130.448
					9.27684	125.18	100.121	87.445	73.47	60.674	49.237	39.103	30.978	24.23	18.873	14.611	11.076	8.829	6.863	5.365	4.165	3.264	2.5	0	26.8315	16.9165	90.7906	74.035	45.471	28.1647	4.20353	-11.8379	-35.8374	-42.8178	0	0	0	0	0	0	0	195.92	127.716	130.333
					9.29767	125.105	100.003	87.014	73.726	60.634	49.241	39.008	31.089	24.223	18.806	14.627	11.396	8.847	6.863	5.282	4.123	3.163	2.469	0	26.7999	16.8331	91.1069	73.9862	45.4747	28.0963	4.21859	-11.8345	-35.7101	-42.8647	0	0	0	0	0	0	0	196.106	127.839	130.456
					9.31851	125.03	100.121	87.14	73.766	60.799	49.379	39.398	31.006	24.394	19.008	14.763	11.525	8.963	6.94	5.433	4.191	3.263	2.547	0	26.8315	16.8575	91.1563	74.1875	45.6021	28.3772	4.20733	-11.918	-36.0937	-43.2633	0	0	0	0	0	0	0	195.945	127.733	130.349
					9.33934	124.955	100.807	87.159	73.753	60.903	49.417	39.256	31.166	24.5	18.989	14.705	11.553	8.91	6.957	5.392	4.215	3.205	2.5	0	27.0154	16.8612	91.1403	74.3144	45.6372	28.2749	4.22904	-11.9698	-36.0576	-43.0933	0	0	0	0	0	0	0	196.352	128.001	130.618
					9.36017	124.881	100.832	87.347	73.603	61.233	49.295	39.741	31.161	24.622	19.064	14.817	11.605	8.986	6.956	5.407	4.28	3.275	2.547	0	27.0221	16.8975	90.9549	74.7171	45.5245	28.6243	4.22836	-12.0294	-36.2001	-43.4215	0	0	0	0	0	0	0	196.318	127.979	130.595
					9.38101	124.807	100.542	87.509	74.425	61.163	49.713	39.749	31.356	24.598	19.22	14.971	11.681	9.054	6.96	5.432	4.245	3.317	2.609	0	26.9444	16.9289	91.9707	74.6317	45.9106	28.63	4.25482	-12.0177	-36.4963	-43.8728	0	0	0	0	0	0	0	196.884	128.353	130.969
					9.40184	124.733	100.505	87.963	73.796	61.134	49.671	39.714	31.337	24.558	19.14	14.949	11.622	8.996	6.987	5.418	4.225	3.308	2.563	0	26.9344	17.0167	91.1934	74.5963	45.8718	28.6048	4.25224	-11.9982	-36.3444	-43.8083	0	0	0	0	0	0	0	196.319	127.98	130.596
					9.42267	124.658	100.806	87.335	73.761	61.026	49.652	39.694	31.357	24.545	19.182	14.867	11.475	8.985	6.963	5.402	4.173	3.197	2.438	0	27.0151	16.8952	91.1502	74.4645	45.8542	28.5904	4.25496	-11.9918	-36.4241	-43.568	0	0	0	0	0	0	0	196.241	127.928	130.545
					9.44351	124.583	101.486	87.005	74.373	61.228	49.537	39.958	31.427	24.741	19.207	14.929	11.503	9.042	6.936	5.432	4.225	3.343	2.531	0	27.1973	16.8314	91.9064	74.711	45.748	28.7805	4.26446	-12.0876	-36.4716	-43.7497	0	0	0	0	0	0	0	197.13	128.515	131.132
					9.46434	124.507	100.925	87.422	73.895	61.172	49.529	39.895	31.49	24.716	19.203	15.035	11.657	9.088	7.059	5.494	4.277	3.287	2.547	0	27.047	16.912	91.3157	74.6427	45.7406	28.7352	4.273	-12.0753	-36.464	-44.0604	0	0	0	0	0	0	0	196.067	127.813	130.43
					9.48517	124.43	100.842	87.381	73.793	61.221	49.577	39.889	31.587	24.767	19.395	15.187	11.692	9.181	7.035	5.49	4.259	3.282	2.547	0	27.0247	16.9041	91.1897	74.7025	45.785	28.7309	4.28617	-12.1003	-36.8286	-44.5058	0	0	0	0	0	0	0	195.188	127.234	129.85
					9.50601	124.351	100.937	87.004	74.417	61.232	49.633	39.935	31.593	24.811	19.415	15.064	11.788	9.023	7.007	5.452	4.107	3.21	2.5	0	27.0502	16.8312	91.9608	74.7159	45.8367	28.764	4.28698	-12.1218	-36.8666	-44.1454	0	0	0	0	0	0	0	196.312	127.975	130.592
					9.52684	124.271	100.515	87.606	74.288	61.479	49.811	40.053	31.865	24.919	19.543	15.269	11.931	9.243	7.157	5.599	4.324	3.4	2.625	0	26.9371	16.9476	91.8014	75.0173	46.0011	28.849	4.32389	-12.1745	-37.1096	-44.7461	0	0	0	0	0	0	0	195.847	127.668	130.285
					9.54767	124.19	100.522	87.749	74.138	61.559	50.185	40.019	31.951	25.039	19.546	15.266	11.876	9.291	7.185	5.534	4.342	3.369	2.594	0	26.939	16.9753	91.616	75.1149	46.3464	28.8245	4.33556	-12.2332	-37.1153	-44.7373	0	0	0	0	0	0	0	196.066	127.813	130.429
					9.56851	124.106	101.333	87.866	74.429	61.74	50.109	40.441	31.959	25.234	19.672	15.43	11.977	9.336	7.265	5.662	4.379	3.429	2.656	0	27.1563	16.9979	91.9756	75.3358	46.2763	29.1284	4.33664	-12.3284	-37.3546	-45.2179	0	0	0	0	0	0	0	196.306	127.971	130.588
					9.58934	124.02	100.545	87.683	74.32	61.699	50.022	40.497	31.946	25.13	19.849	15.429	11.96	9.329	7.263	5.677	4.399	3.366	2.609	0	26.9452	16.9625	91.8409	75.2857	46.1959	29.1688	4.33488	-12.2776	-37.6907	-45.215	0	0	0	0	0	0	0	195.551	127.473	130.089
					9.61019	123.931	100.636	87.668	74.205	61.702	50.129	40.382	32.213	25.367	19.839	15.625	12.121	9.378	7.37	5.691	4.412	3.43	2.641	0	26.9695	16.9596	91.6988	75.2894	46.2947	29.0859	4.37111	-12.3934	-37.6717	-45.7894	0	0	0	0	0	0	0	194.815	126.987	129.603
					9.63102	123.839	100.506	87.815	74.391	61.519	50.432	40.408	32.112	25.164	19.966	15.522	12.113	9.379	7.312	5.62	4.376	3.42	2.578	0	26.9347	16.9881	91.9287	75.0661	46.5746	29.1047	4.35741	-12.2942	-37.9128	-45.4875	0	0	0	0	0	0	0	195.26	127.281	129.897
					9.65185	123.745	100.614	87.512	74.852	61.98	50.431	40.615	32.407	25.568	20.044	15.746	12.172	9.499	7.244	5.672	4.409	3.465	2.641	0	26.9636	16.9295	92.4984	75.6286	46.5736	29.2538	4.39744	-12.4916	-38.061	-46.144	0	0	0	0	0	0	0	195.548	127.471	130.088
					9.67269	123.647	100.797	87.561	74.781	61.834	50.7	40.68	32.265	25.638	20.227	15.703	12.278	9.56	7.346	5.745	4.41	3.448	2.656	0	27.0127	16.9389	92.4106	75.4505	46.8221	29.3006	4.37817	-12.5258	-38.4084	-46.018	0	0	0	0	0	0	0	195.361	127.348	129.964
					9.69352	123.546	100.701	87.949	74.466	61.916	50.59	40.788	32.646	25.68	20.135	15.791	12.285	9.622	7.394	5.772	4.468	3.443	2.641	0	26.987	17.014	92.0214	75.5505	46.7205	29.3784	4.42987	-12.5463	-38.2337	-46.2758	0	0	0	0	0	0	0	195.046	127.139	129.756
					9.71435	123.441	100.834	87.608	74.744	62.078	50.998	40.95	32.518	25.932	20.346	15.883	12.385	9.634	7.511	5.836	4.557	3.525	2.734	0	27.0226	16.948	92.3649	75.7482	47.0973	29.4951	4.4125	-12.6694	-38.6344	-46.5454	0	0	0	0	0	0	0	195.239	127.267	129.884
					9.73519	123.332	100.882	87.669	74.923	62.086	50.943	40.99	32.596	25.913	20.385	16.122	12.45	9.81	7.541	5.865	4.526	3.497	2.688	0	27.0355	16.9598	92.5861	75.758	47.0465	29.5239	4.42308	-12.6602	-38.7085	-47.2458	0	0	0	0	0	0	0	194.718	126.923	129.54
					9.75602	123.219	100.885	87.859	74.714	62.305	51.028	41.468	32.982	26.068	20.509	16.193	12.605	9.829	7.68	5.939	4.656	3.554	2.766	0	27.0363	16.9966	92.3278	76.0252	47.125	29.8682	4.47546	-12.7359	-38.9439	-47.4539	0	0	0	0	0	0	0	194.721	126.925	129.541
					9.77685	123.102	100.945	87.881	74.798	62.352	51.069	41.273	33.165	26.155	20.699	16.186	12.668	9.836	7.679	5.94	4.684	3.588	2.766	0	27.0524	17.0008	92.4316	76.0825	47.1628	29.7277	4.50029	-12.7784	-39.3047	-47.4334	0	0	0	0	0	0	0	194.442	126.741	129.357
					9.79769	122.98	100.828	87.725	74.72	62.333	51.046	41.264	33.104	26.146	20.674	16.13	12.654	9.868	7.601	5.936	4.567	3.544	2.688	0	27.021	16.9707	92.3352	76.0593	47.1416	29.7212	4.49201	-12.774	-39.2572	-47.2693	0	0	0	0	0	0	0	194.441	126.74	129.357
					9.81852	122.853	100.889	87.878	74.557	62.707	51.238	41.433	33.206	26.301	20.864	16.302	12.759	9.963	7.701	5.896	4.594	3.542	2.719	0	27.0373	17.0003	92.1338	76.5157	47.3189	29.8429	4.50585	-12.8497	-39.618	-47.7733	0	0	0	0	0	0	0	194.114	126.524	129.141
					9.83935	122.721	100.737	87.847	74.988	62.393	51.171	41.416	33.157	26.203	20.765	16.431	12.828	10.027	7.645	6.015	4.683	3.604	2.703	0	26.9966	16.9943	92.6664	76.1326	47.257	29.8307	4.49921	-12.8018	-39.43	-48.1514	0	0	0	0	0	0	0	193.994	126.445	129.062
					9.86019	122.583	100.872	87.929	74.764	62.706	51.402	41.622	33.34	26.624	20.877	16.622	12.84	10.101	7.802	6.026	4.703	3.626	2.797	0	27.0328	17.0101	92.3896	76.5145	47.4704	29.9791	4.52404	-13.0075	-39.6427	-48.7111	0	0	0	0	0	0	0	193.559	126.158	128.775
					9.88102	122.44	100.66	88.191	75.141	62.893	51.591	41.85	33.513	26.763	21.136	16.669	13.028	10.178	7.904	6.151	4.771	3.68	2.844	0	26.976	17.0608	92.8555	76.7427	47.6449	30.1433	4.54751	-13.0754	-40.1345	-48.8488	0	0	0	0	0	0	0	193.912	126.391	129.008
					9.90185	122.291	101.088	88.22	75.348	62.758	51.999	41.993	33.709	26.85	21.236	16.662	13.111	10.196	7.945	6.177	4.762	3.695	2.844	0	27.0907	17.0664	93.1113	76.5779	48.0217	30.2463	4.57411	-13.1179	-40.3244	-48.8283	0	0	0	0	0	0	0	194.418	126.725	129.341
					9.92269	122.129	100.502	88.219	75.474	62.851	51.834	42	33.8	26.941	21.364	16.678	13.076	10.199	7.963	6.118	4.741	3.592	2.813	0	26.9336	17.0662	93.267	76.6914	47.8693	30.2513	4.58646	-13.1624	-40.5675	-48.8752	0	0	0	0	0	0	0	194.06	126.489	129.106
					9.94352	121.952	100.638	88.278	75.18	63.238	51.756	42.481	33.755	27.144	21.608	16.96	13.328	10.415	8.104	6.252	4.843	3.737	2.906	0	26.9701	17.0776	92.9037	77.1636	47.7973	30.5978	4.58035	-13.2616	-41.0308	-49.7016	0	0	0	0	0	0	0	193.096	125.853	128.469
					9.96435	121.762	100.654	88.447	75.341	63.078	52.118	42.344	34.048	27.364	21.527	17.092	13.38	10.465	8.086	6.256	4.892	3.758	2.891	0	26.9744	17.1103	93.1026	76.9684	48.1316	30.4991	4.62011	-13.3691	-40.877	-50.0884	0	0	0	0	0	0	0	193.072	125.837	128.453
					9.98519	121.559	100.729	88.395	75.059	63.394	52.216	42.486	34.104	27.33	21.737	17.024	13.558	10.526	8.245	6.371	4.96	3.806	2.891	0	26.9945	17.1003	92.7542	77.354	48.2221	30.6014	4.62771	-13.3525	-41.2757	-49.8892	0	0	0	0	0	0	0	193.137	125.88	128.496
					10.006	121.343	100.778	88.033	75.788	63.344	52.43	42.663	34.307	27.57	21.875	17.133	13.576	10.613	8.25	6.429	4.979	3.876	2.984	0	27.0076	17.0302	93.655	77.293	48.4197	30.7289	4.65525	-13.4697	-41.5378	-50.2086	0	0	0	0	0	0	0	193.574	126.168	128.784
					10.0269	121.114	100.661	88.403	75.253	63.378	52.474	42.505	34.709	27.538	21.9	17.296	13.622	10.52	8.203	6.394	4.933	3.801	2.922	0	26.9762	17.1018	92.9939	77.3345	48.4604	30.6151	4.7098	-13.4541	-41.5853	-50.6863	0	0	0	0	0	0	0	192.466	125.437	128.053
					10.0477	120.874	101.457	88.145	75.672	63.504	52.587	42.824	34.682	27.656	22.111	17.256	13.657	10.68	8.312	6.457	5.01	3.861	2.984	0	27.1896	17.0519	93.5117	77.4882	48.5647	30.8448	4.70614	-13.5117	-41.9859	-50.5691	0	0	0	0	0	0	0	193.29	125.981	128.597
					10.0685	120.622	100.848	88.137	75.642	63.558	52.658	42.945	34.596	27.845	22.058	17.499	13.651	10.709	8.338	6.499	4.971	3.833	2.969	0	27.0264	17.0504	93.4746	77.5541	48.6303	30.932	4.69447	-13.6041	-41.8853	-51.2812	0	0	0	0	0	0	0	192.592	125.52	128.136
					10.0894	120.358	100.647	88.001	75.549	63.557	52.711	42.975	34.709	27.756	22.215	17.463	13.747	10.63	8.314	6.456	4.981	3.844	2.938	0	26.9725	17.0241	93.3597	77.5529	48.6792	30.9536	4.7098	-13.5606	-42.1834	-51.1757	0	0	0	0	0	0	0	192.332	125.348	127.965
					10.1102	120.084	100.838	88.307	75.59	63.852	52.903	43.103	34.954	28	22.229	17.52	13.922	10.873	8.396	6.555	5.08	3.9	2.984	0	27.0237	17.0833	93.4103	77.9128	48.8566	31.0458	4.74305	-13.6798	-42.21	-51.3427	0	0	0	0	0	0	0	192.843	125.686	128.302
					10.131	119.8	100.998	88.416	75.799	63.96	52.867	43.346	35.2	28.219	22.418	17.838	14.038	10.988	8.562	6.613	5.136	3.98	3.031	0	27.0666	17.1043	93.6686	78.0446	48.8233	31.2208	4.77643	-13.7868	-42.5689	-52.2746	0	0	0	0	0	0	0	192.074	125.178	127.795
					10.1519	119.506	100.981	88.388	75.915	63.764	53.196	43.469	35.131	28.326	22.522	17.9	14.114	10.971	8.546	6.621	5.101	3.982	3.047	0	27.062	17.0989	93.812	77.8055	49.1271	31.3094	4.76707	-13.8391	-42.7664	-52.4563	0	0	0	0	0	0	0	191.92	125.077	127.693
					10.1727	119.202	100.94	88.041	76.104	64.397	53.075	43.57	35.394	28.403	22.712	17.907	14.179	11.035	8.602	6.673	5.176	3.963	3.047	0	27.051	17.0318	94.0455	78.5779	49.0154	31.3822	4.80275	-13.8767	-43.1271	-52.4768	0	0	0	0	0	0	0	192.426	125.41	128.027
					10.1935	118.89	101.242	88.63	76.165	64.498	53.219	43.743	35.405	28.592	22.8	18.034	14.152	11.063	8.663	6.675	5.071	3.962	3	0	27.1319	17.1457	94.1209	78.7011	49.1484	31.5068	4.80425	-13.969	-43.2942	-52.849	0	0	0	0	0	0	0	192.447	125.424	128.041
					10.2144	118.568	101.181	88.882	76.385	64.498	53.42	43.897	35.667	28.684	22.888	18.188	14.283	11.109	8.584	6.677	5.147	3.963	3.047	0	27.1156	17.1945	94.3928	78.7011	49.334	31.6177	4.8398	-14.014	-43.4613	-53.3003	0	0	0	0	0	0	0	192.42	125.406	128.023
					10.2352	118.239	100.736	88.828	76.46	64.429	53.588	44.07	35.788	28.996	23.009	18.43	14.462	11.334	8.773	6.755	5.253	4.061	3.094	0	26.9963	17.184	94.4854	78.6169	49.4892	31.7423	4.85622	-14.1664	-43.6911	-54.0095	0	0	0	0	0	0	0	191.503	124.802	127.418
					10.256	117.902	100.812	88.562	76.67	64.57	53.964	44.211	35.822	29.084	23.156	18.473	14.493	11.291	8.802	6.787	5.299	4.067	3.125	0	27.0167	17.1326	94.745	78.789	49.8364	31.8439	4.86083	-14.2094	-43.9702	-54.1355	0	0	0	0	0	0	0	191.909	125.069	127.686
					10.2769	117.557	100.842	88.564	76.747	64.887	53.87	44.302	36.218	29.041	23.359	18.392	14.585	11.417	8.855	6.854	5.293	4.082	3.094	0	27.0247	17.133	94.8401	79.1758	49.7496	31.9094	4.91457	-14.1884	-44.3557	-53.8981	0	0	0	0	0	0	0	192.305	125.331	127.947
					10.2977	117.206	101.124	89.297	76.977	64.634	54.09	44.621	36.301	29.392	23.581	18.697	14.724	11.539	8.949	6.964	5.352	4.154	3.141	0	27.1003	17.2748	95.1243	78.8671	49.9528	32.1392	4.92583	-14.3599	-44.7773	-54.7919	0	0	0	0	0	0	0	191.455	124.77	127.386
					10.3185	116.848	101.487	88.762	76.562	65.414	54.249	44.712	36.422	29.462	23.614	18.72	14.792	11.565	9.035	6.97	5.419	4.126	3.141	0	27.1976	17.1713	94.6115	79.8188	50.0996	32.2047	4.94225	-14.3941	-44.8399	-54.8593	0	0	0	0	0	0	0	191.952	125.098	127.714
					10.3394	116.484	101.321	89.041	77.251	65.017	54.719	44.916	36.604	29.647	23.809	18.781	14.927	11.632	9.066	7.031	5.455	4.177	3.172	0	27.1531	17.2252	95.4629	79.3344	50.5337	32.3516	4.96694	-14.4845	-45.2102	-55.0381	0	0	0	0	0	0	0	192.295	125.324	127.941
					10.3602	116.115	101.292	89.14	77.436	65.291	54.67	45.12	36.761	29.98	23.956	19.044	15.002	11.761	9.151	7.07	5.477	4.235	3.219	0	27.1453	17.2444	95.6915	79.6687	50.4884	32.4986	4.98825	-14.6471	-45.4893	-55.8088	0	0	0	0	0	0	0	191.78	124.984	127.601
					10.381	115.74	101.389	89.264	77.115	65.757	54.834	45.306	37.008	30.073	24.037	19.176	15.086	11.865	9.183	7.063	5.492	4.214	3.188	0	27.1713	17.2684	95.2949	80.2373	50.6399	32.6326	5.02176	-14.6926	-45.6431	-56.1957	0	0	0	0	0	0	0	191.735	124.954	127.571
					10.4019	115.361	101.578	89.943	77.204	65.987	54.979	45.46	37.037	30.23	24.141	19.353	15.149	11.912	9.249	7.119	5.496	4.232	3.266	0	27.222	17.3997	95.4048	80.518	50.7738	32.7435	5.0257	-14.7693	-45.8406	-56.7144	0	0	0	0	0	0	0	191.763	124.973	127.59
					10.4227	114.977	101.128	89.583	77.96	65.942	55.223	45.714	37.35	30.452	24.484	19.488	15.346	12.045	9.357	7.244	5.586	4.3	3.266	0	27.1014	17.3301	96.3391	80.4631	50.9991	32.9264	5.06817	-14.8778	-46.4919	-57.11	0	0	0	0	0	0	0	191.748	124.963	127.579
					10.4435	114.59	101.777	89.686	77.636	66.311	55.425	45.88	37.634	30.59	24.501	19.738	15.454	12.164	9.431	7.26	5.627	4.328	3.266	0	27.2753	17.35	95.9387	80.9133	51.1857	33.046	5.10671	-14.9452	-46.5242	-57.8426	0	0	0	0	0	0	0	191.504	124.802	127.418
					10.4644	114.199	101.907	89.869	77.801	66.275	55.609	46.111	37.834	30.789	24.759	19.801	15.586	12.241	9.449	7.325	5.596	4.356	3.344	0	27.3102	17.3854	96.1426	80.8694	51.3556	33.2124	5.13385	-15.0424	-47.0141	-58.0272	0	0	0	0	0	0	0	191.326	124.684	127.301
					10.4852	113.805	101.516	90.042	78.487	66.116	55.816	46.331	38.2	30.967	24.918	19.901	15.748	12.292	9.511	7.389	5.7	4.353	3.328	0	27.2054	17.4189	96.9903	80.6754	51.5467	33.3708	5.18351	-15.1294	-47.316	-58.3203	0	0	0	0	0	0	0	191.625	124.882	127.499
					10.506	113.408	101.683	90.278	78.278	66.753	56.089	46.58	38.392	31.21	25.016	20.004	15.84	12.434	9.604	7.419	5.701	4.368	3.328	0	27.2501	17.4645	96.732	81.4527	51.7989	33.5502	5.20956	-15.2481	-47.5021	-58.6221	0	0	0	0	0	0	0	192.086	125.186	127.802
					10.5269	113.009	102.409	90.478	78.488	66.656	56.339	46.999	38.47	31.264	25.298	20.198	15.906	12.387	9.662	7.416	5.73	4.385	3.344	0	27.4447	17.5032	96.9915	81.3343	52.0297	33.852	5.22015	-15.2745	-48.0376	-59.1906	0	0	0	0	0	0	0	191.873	125.045	127.662
					10.5477	112.608	102.047	90.562	78.639	67.031	56.529	47.231	38.586	31.535	25.388	20.375	15.955	12.507	9.746	7.477	5.769	4.408	3.375	0	27.3477	17.5195	97.1781	81.7919	52.2052	34.0191	5.23589	-15.4069	-48.2085	-59.7093	0	0	0	0	0	0	0	191.973	125.111	127.728
					10.5685	112.206	102.297	90.788	78.908	67.001	56.969	47.108	38.966	31.725	25.549	20.383	16.138	12.631	9.839	7.584	5.822	4.47	3.406	0	27.4147	17.5632	97.5106	81.7553	52.6116	33.9305	5.28745	-15.4997	-48.5142	-59.7328	0	0	0	0	0	0	0	192.327	125.345	127.961
					10.5894	111.803	102.799	90.515	79.062	67.837	56.961	47.336	39.036	31.982	25.678	20.545	16.2	12.674	9.791	7.582	5.785	4.487	3.359	0	27.5492	17.5104	97.7009	82.7754	52.6042	34.0947	5.29695	-15.6253	-48.7592	-60.2075	0	0	0	0	0	0	0	192.94	125.75	128.366
					10.6102	111.399	102.898	90.557	79.199	67.616	57.064	47.736	39.074	32.192	25.762	20.661	16.368	12.74	9.863	7.601	5.874	4.456	3.359	0	27.5757	17.5185	97.8702	82.5057	52.6993	34.3828	5.30211	-15.7279	-48.9187	-60.5475	0	0	0	0	0	0	0	192.66	125.565	128.182
					10.631	110.996	102.667	91.281	79.387	67.548	57.464	47.641	39.448	32.103	25.973	20.746	16.317	12.861	9.915	7.635	5.846	4.499	3.406	0	27.5138	17.6586	98.1025	82.4227	53.0687	34.3144	5.35286	-15.6844	-49.3194	-60.7966	0	0	0	0	0	0	0	192.633	125.547	128.164
					10.6519	110.593	102.655	91.32	79.468	67.89	57.426	47.856	39.566	32.476	26.018	20.989	16.445	12.919	9.949	7.733	5.951	4.544	3.453	0	27.5106	17.6661	98.2026	82.8401	53.0336	34.4692	5.36887	-15.8666	-49.4048	-61.5087	0	0	0	0	0	0	0	192.311	125.335	127.951
					10.6727	110.19	102.834	91.059	79.725	68.222	57.624	48.042	39.779	32.632	26.279	21.083	16.615	12.988	10.012	7.75	5.977	4.573	3.469	0	27.5586	17.6156	98.5202	83.2452	53.2165	34.6032	5.39777	-15.9428	-49.9004	-61.7842	0	0	0	0	0	0	0	192.53	125.479	128.095
					10.6935	109.789	102.772	91.106	79.83	68.446	57.518	48.391	39.89	32.678	26.281	21.113	16.528	13.03	10.1	7.765	5.959	4.53	3.359	0	27.542	17.6247	98.6499	83.5185	53.1186	34.8546	5.41283	-15.9653	-49.9042	-61.8721	0	0	0	0	0	0	0	192.98	125.776	128.392
					10.7144	109.389	102.775	91.171	79.803	68.145	57.937	48.496	39.926	32.687	26.358	21.018	16.716	12.956	10.023	7.715	5.861	4.476	3.422	0	27.5428	17.6373	98.6166	83.1512	53.5055	34.9302	5.41772	-15.9697	-50.0504	-61.5937	0	0	0	0	0	0	0	193.188	125.913	128.53
					10.7352	108.992	102.79	91.283	79.835	68.343	57.936	48.314	40.077	32.891	26.389	21.175	16.722	13.006	10.083	7.772	5.936	4.493	3.406	0	27.5468	17.659	98.6561	83.3928	53.5046	34.7991	5.43821	-16.0694	-50.1093	-62.0538	0	0	0	0	0	0	0	192.764	125.634	128.25
					10.756	108.596	102.535	91.941	79.585	68.576	58.119	48.709	40.162	32.963	26.525	21.274	16.87	13.04	10.029	7.736	5.936	4.473	3.438	0	27.4785	17.7863	98.3472	83.6771	53.6736	35.0836	5.44974	-16.1045	-50.3675	-62.3439	0	0	0	0	0	0	0	192.68	125.578	128.195
					10.7769	108.204	102.708	91.56	80.246	68.933	58.224	48.517	40.489	32.899	26.727	21.288	16.871	13.134	10.166	7.778	5.945	4.53	3.422	0	27.5248	17.7126	99.164	84.1127	53.7706	34.9453	5.49411	-16.0733	-50.7511	-62.3849	0	0	0	0	0	0	0	193.515	126.129	128.746
					10.7977	107.815	102.625	91.546	80.289	68.615	58.316	48.898	40.296	33.002	26.828	21.25	16.909	13.203	10.244	7.827	6.002	4.571	3.406	0	27.5026	17.7098	99.2171	83.7247	53.8555	35.2198	5.46793	-16.1236	-50.9429	-62.2736	0	0	0	0	0	0	0	193.357	126.025	128.642
					10.8185	107.43	102.7	91.611	80.349	68.585	58.321	48.974	40.398	33.07	26.783	21.442	16.795	13.079	10.142	7.843	5.992	4.503	3.438	0	27.5227	17.7224	99.2913	83.6881	53.8601	35.2745	5.48177	-16.1568	-50.8574	-62.8362	0	0	0	0	0	0	0	192.99	125.783	128.399
					10.8394	107.049	103.227	91.762	80.031	69.451	58.479	48.869	40.502	33.46	26.803	21.625	16.879	13.283	10.188	7.851	6.028	4.543	3.469	0	27.6639	17.7516	98.8983	84.7448	54.0061	35.1989	5.49588	-16.3474	-50.8954	-63.3725	0	0	0	0	0	0	0	193.144	125.884	128.501
					10.8602	106.673	103.197	91.741	80.164	69.213	58.571	49.207	40.627	33.452	26.931	21.523	17.076	13.285	10.229	7.873	5.974	4.615	3.422	0	27.6559	17.7476	99.0627	84.4544	54.091	35.4423	5.51284	-16.3434	-51.1385	-63.0736	0	0	0	0	0	0	0	193.411	126.061	128.677
					10.881	106.301	102.688	91.86	80.082	69.216	58.667	49.039	40.923	33.282	27.016	21.619	16.982	13.305	10.226	7.856	6.043	4.584	3.484	0	27.5195	17.7706	98.9613	84.4581	54.1797	35.3213	5.55301	-16.2604	-51.2999	-63.3549	0	0	0	0	0	0	0	192.848	125.689	128.306
					10.9019	105.936	102.664	91.822	80.14	69.006	58.753	49.399	40.753	33.583	27.117	21.582	17.057	13.333	10.269	7.903	6.081	4.63	3.422	0	27.513	17.7632	99.033	84.2018	54.2591	35.5806	5.52994	-16.4074	-51.4917	-63.2465	0	0	0	0	0	0	0	192.735	125.615	128.231
					10.9227	105.576	103.401	91.865	80.22	69.226	58.863	49.339	40.794	33.721	27.054	21.719	17.03	13.342	10.273	7.878	6.056	4.57	3.422	0	27.7105	17.7716	99.1319	84.4703	54.3607	35.5374	5.5355	-16.4749	-51.372	-63.648	0	0	0	0	0	0	0	193.023	125.804	128.421
					10.9435	105.219	102.898	91.954	80.403	69.407	58.924	49.489	40.83	33.643	27.225	21.681	17.083	13.319	10.276	7.868	6.021	4.57	3.438	0	27.5757	17.7888	99.358	84.6911	54.417	35.6454	5.54039	-16.4368	-51.6967	-63.5366	0	0	0	0	0	0	0	193.346	126.018	128.634
					10.9644	104.859	102.658	91.884	80.405	69.438	58.982	49.256	41.153	33.749	27.196	21.847	17.145	13.445	10.378	7.988	6.096	4.638	3.531	0	27.5114	17.7752	99.3605	84.7289	54.4706	35.4776	5.58422	-16.4885	-51.6417	-64.0231	0	0	0	0	0	0	0	192.755	125.628	128.244
					10.9852	104.495	102.536	91.767	80.22	69.299	58.97	49.303	41.179	33.593	27.318	21.789	17.372	13.444	10.484	7.992	6.123	4.622	3.516	0	27.4787	17.7526	99.1319	84.5593	54.4595	35.5115	5.58774	-16.4123	-51.8733	-63.8531	0	0	0	0	0	0	0	192.342	125.355	127.972
					11.006	104.128	102.434	91.149	80.063	69.262	58.517	49.366	40.82	33.68	27.003	21.787	17.169	13.415	10.338	7.926	6.052	4.565	3.5	0	27.4514	17.633	98.9379	84.5142	54.0412	35.5568	5.53903	-16.4548	-51.2752	-63.8472	0	0	0	0	0	0	0	192.096	125.193	127.809
					11.0269	103.758	102.159	91.323	79.826	68.702	58.254	49.079	40.531	33.437	26.951	21.543	17.095	13.226	10.188	7.824	5.938	4.512	3.438	0	27.3777	17.6667	98.645	83.8309	53.7983	35.3501	5.49981	-16.3361	-51.1764	-63.1322	0	0	0	0	0	0	0	191.524	124.815	127.431
					11.0477	103.385	101.898	90.616	79.579	68.839	58.173	48.695	40.357	33.071	26.806	21.294	16.871	13.076	10.181	7.762	5.911	4.521	3.344	0	27.3077	17.5299	98.3397	83.998	53.7235	35.0735	5.4762	-16.1573	-50.9011	-62.4025	0	0	0	0	0	0	0	191.988	125.121	127.738
					11.0685	103.009	101.467	90.179	79.043	68.239	57.777	48.684	40.175	32.95	26.594	21.147	16.802	13.108	10.096	7.733	5.929	4.487	3.422	0	27.1922	17.4454	97.6774	83.2659	53.3578	35.0656	5.45151	-16.0982	-50.4985	-61.9717	0	0	0	0	0	0	0	190.887	124.395	127.011
					11.0894	102.63	100.648	89.649	78.53	67.722	57.476	47.976	39.634	32.519	26.46	21.107	16.527	12.997	9.985	7.641	5.833	4.421	3.375	0	26.9728	17.3429	97.0434	82.6351	53.0798	34.5557	5.3781	-15.8876	-50.2441	-61.8545	0	0	0	0	0	0	0	189.021	123.163	125.78
					11.1102	102.249	100.327	89.112	78.203	67.367	56.947	47.566	39.667	32.397	26.236	20.856	16.44	12.851	9.909	7.638	5.792	4.433	3.359	0	26.8867	17.239	96.6394	82.2019	52.5912	34.2604	5.38257	-15.828	-49.8188	-61.1189	0	0	0	0	0	0	0	188.435	122.777	125.393
					11.131	101.866	99.335	88.752	77.899	66.597	56.804	47.614	39.451	32.018	26.008	20.875	16.367	12.812	9.824	7.594	5.765	4.425	3.328	0	26.6209	17.1693	96.2637	81.2623	52.4592	34.2949	5.35326	-15.6428	-49.3858	-61.1746	0	0	0	0	0	0	0	187.22	121.975	124.591
					11.1519	101.481	99.158	88.219	77.003	66.729	56.439	47.019	39.108	31.99	25.665	20.554	16.131	12.636	9.803	7.481	5.739	4.354	3.234	0	26.5735	17.0662	95.1565	81.4234	52.1221	33.8664	5.30672	-15.6292	-48.7345	-60.2339	0	0	0	0	0	0	0	186.917	121.775	124.391
					11.1727	101.094	98.958	87.847	76.702	66.05	56.035	46.843	38.739	31.533	25.476	20.253	16.108	12.504	9.703	7.491	5.65	4.331	3.297	0	26.5199	16.9943	94.7845	80.5949	51.749	33.7396	5.25665	-15.4059	-48.3756	-59.3518	0	0	0	0	0	0	0	186.505	121.503	124.119
					11.1935	100.706	97.814	87.338	76.171	65.552	55.711	46.359	38.413	31.251	25.263	20.239	15.741	12.346	9.506	7.341	5.564	4.282	3.266	0	26.2133	16.8958	94.1283	79.9872	51.4498	33.391	5.21241	-15.2681	-47.9712	-59.3108	0	0	0	0	0	0	0	184.728	120.33	122.946
					11.2144	100.316	97.901	86.518	76.323	65.497	55.072	46.031	38.036	31.182	25.013	20.05	15.664	12.251	9.499	7.241	5.537	4.271	3.188	0	26.2366	16.7372	94.3161	79.9201	50.8597	33.1547	5.16126	-15.2344	-47.4964	-58.7569	0	0	0	0	0	0	0	184.898	120.442	123.058
					11.2352	99.9243	96.509	86.907	75.35	64.728	54.792	45.782	37.978	30.697	24.807	19.829	15.512	12.127	9.389	7.215	5.548	4.241	3.188	0	25.8635	16.8124	93.1138	78.9818	50.6011	32.9754	5.15339	-14.9974	-47.1053	-58.1093	0	0	0	0	0	0	0	183.289	119.38	121.997
					11.256	99.5321	96.375	85.569	75.374	64.344	54.405	45.453	37.498	30.489	24.607	19.504	15.418	12.045	9.269	7.085	5.467	4.148	3.141	0	25.8276	16.5536	93.1434	78.5132	50.2437	32.7384	5.08825	-14.8958	-46.7255	-57.1569	0	0	0	0	0	0	0	183.33	119.407	122.024
					11.2769	99.139	95.857	85.128	74.558	64.264	54.159	45.132	37.196	30.206	24.326	19.323	15.222	11.951	9.302	7.104	5.487	4.199	3.219	0	25.6888	16.4683	92.135	78.4156	50.0165	32.5072	5.04727	-14.7576	-46.1919	-56.6264	0	0	0	0	0	0	0	182.703	118.993	121.61
					11.2977	98.7453	95.052	85.251	74.276	63.561	53.846	44.978	36.989	30.026	24.289	19.31	15.215	11.929	9.09	7.01	5.355	4.12	3.063	0	25.4731	16.4921	91.7866	77.5578	49.7274	32.3963	5.01919	-14.6696	-46.1217	-56.5883	0	0	0	0	0	0	0	181.073	117.917	120.534
					11.3185	98.3511	94.956	84.333	73.936	63.218	53.353	44.656	36.633	29.997	24.113	19.23	15.055	11.782	9.097	6.975	5.354	4.103	3.125	0	25.4474	16.3145	91.3664	77.1392	49.2721	32.1644	4.97088	-14.6555	-45.7875	-56.3539	0	0	0	0	0	0	0	179.878	117.129	119.745
					11.3394	97.9567	93.902	83.901	73.013	63.141	53.082	44.396	36.281	29.645	23.991	18.903	14.851	11.648	9.027	6.932	5.324	4.088	2.969	0	25.1649	16.2309	90.2258	77.0453	49.0219	31.9771	4.92311	-14.4835	-45.5558	-55.3956	0	0	0	0	0	0	0	179.154	116.651	119.267
					11.3602	97.5623	93.646	83.53	73.475	62.688	53	43.759	36.361	29.561	23.822	18.9	14.915	11.684	8.975	6.862	5.369	4.103	3.078	0	25.0963	16.1591	90.7967	76.4925	48.9461	31.5183	4.93397	-14.4424	-45.2349	-55.3868	0	0	0	0	0	0	0	178.879	116.469	119.086
					11.381	97.168	93.079	83.14	72.737	62.39	52.603	43.826	36.244	29.266	23.708	18.872	14.733	11.59	8.97	6.916	5.342	4.045	3.047	0	24.9443	16.0837	89.8847	76.1289	48.5795	31.5666	4.91809	-14.2983	-45.0184	-55.3048	0	0	0	0	0	0	0	177.484	115.549	118.165
					11.4019	96.7741	92.905	82.503	72.561	62.072	52.303	43.66	35.957	29.134	23.52	18.626	14.703	11.503	8.936	6.813	5.275	4.002	3.016	0	24.8977	15.9605	89.6673	75.7409	48.3024	31.447	4.87915	-14.2338	-44.6614	-54.5839	0	0	0	0	0	0	0	177.416	115.504	118.12
					11.4227	96.3807	92.51	82.627	72.243	61.922	52.182	43.452	35.633	29.119	23.369	18.51	14.68	11.485	8.844	6.756	5.204	3.992	3.016	0	24.7918	15.9844	89.2743	75.5578	48.1907	31.2972	4.83518	-14.2265	-44.3747	-54.2439	0	0	0	0	0	0	0	177.086	115.286	117.903
					11.4435	95.9881	92.183	82.327	71.988	61.417	51.817	43.336	35.511	29.05	23.293	18.567	14.621	11.366	8.836	6.817	5.243	4.044	3.094	0	24.7042	15.9264	88.9592	74.9416	47.8536	31.2136	4.81863	-14.1928	-44.2304	-54.411	0	0	0	0	0	0	0	175.583	114.294	116.911
					11.4644	95.5964	92.019	82.246	71.911	61.359	51.884	43.166	35.353	28.804	23.234	18.488	14.505	11.396	8.825	6.824	5.22	4.092	3.078	0	24.6603	15.9107	88.864	74.8709	47.9155	31.0912	4.79719	-14.0726	-44.1183	-54.1795	0	0	0	0	0	0	0	175.739	114.397	117.014
					11.4852	95.2058	91.07	81.963	71.442	61.156	51.728	42.977	35.035	28.716	23.089	18.278	14.426	11.243	8.791	6.821	5.304	4.062	3.078	0	24.4059	15.856	88.2845	74.6232	47.7714	30.955	4.75404	-14.0296	-43.843	-53.564	0	0	0	0	0	0	0	175.213	114.05	116.667
					11.506	94.8165	91.439	81.136	71.206	60.823	51.48	42.627	35.082	28.565	22.996	18.227	14.404	11.288	8.735	6.722	5.203	3.927	3.047	0	24.5048	15.696	87.9928	74.2168	47.5424	30.7029	4.76042	-13.9558	-43.6664	-53.4146	0	0	0	0	0	0	0	174.379	113.5	116.116
					11.5269	94.4286	90.995	80.737	70.656	60.612	51.143	42.473	34.634	28.266	22.755	18.166	14.29	11.155	8.629	6.703	5.152	3.937	3.016	0	24.3858	15.6188	87.3132	73.9594	47.2312	30.592	4.69963	-13.8098	-43.2088	-53.2358	0	0	0	0	0	0	0	173.546	112.949	115.566
					11.5477	94.0426	90.1	80.904	70.061	60.312	50.987	42.218	34.702	28.185	22.686	18.054	14.225	11.183	8.542	6.683	5.136	4.018	3.047	0	24.146	15.6511	86.5779	73.5933	47.0871	30.4084	4.70885	-13.7702	-43.0778	-52.9076	0	0	0	0	0	0	0	172.417	112.205	114.821
					11.5686	93.6585	90.184	80.466	69.978	59.835	50.531	42.021	34.598	28.001	22.54	17.912	14.169	11.097	8.608	6.631	5.067	3.939	3.031	0	24.1685	15.5664	86.4753	73.0113	46.666	30.2665	4.69474	-13.6803	-42.8005	-52.4915	0	0	0	0	0	0	0	171.876	111.848	114.464
					11.5894	93.2765	89.534	80.29	69.622	59.847	50.288	41.836	34.291	27.925	22.377	17.913	14.062	10.969	8.525	6.555	5.002	3.918	3	0	23.9943	15.5323	86.0354	73.0259	46.4416	30.1332	4.65308	-13.6431	-42.491	-52.4944	0	0	0	0	0	0	0	171.187	111.393	114.009
					11.6102	92.8968	89.161	79.975	69.42	59.3	50.057	41.608	34.008	27.87	22.174	17.666	13.963	10.927	8.474	6.483	5.101	3.937	2.922	0	23.8943	15.4714	85.7858	72.3585	46.2282	29.969	4.61468	-13.6163	-42.1055	-51.7706	0	0	0	0	0	0	0	170.829	111.157	113.773
					11.6311	92.5197	89.432	79.198	69.458	59.147	49.919	41.49	33.852	27.533	22.238	17.411	13.832	10.871	8.368	6.519	5.004	3.927	3	0	23.967	15.3211	85.8327	72.1718	46.1008	29.884	4.59351	-13.4516	-42.2271	-51.0233	0	0	0	0	0	0	0	171.169	111.381	113.997
					11.6519	92.1452	88.972	78.898	68.984	58.846	49.663	41.038	33.861	27.425	22.012	17.521	13.839	10.783	8.344	6.45	5.011	3.846	2.969	0	23.8437	15.2631	85.247	71.8045	45.8644	29.5584	4.59473	-13.3989	-41.7979	-51.3456	0	0	0	0	0	0	0	169.633	110.367	112.984
					11.6727	91.7736	88.319	78.676	68.991	58.716	49.341	41.162	33.676	27.132	21.957	17.48	13.745	10.79	8.387	6.551	5.087	3.887	2.922	0	23.6687	15.2201	85.2556	71.6459	45.567	29.6478	4.56963	-13.2557	-41.6935	-51.2255	0	0	0	0	0	0	0	169.4	110.213	112.83
					11.6936	91.4051	88.308	78.425	68.058	58.559	49.383	40.94	33.259	27.316	21.786	17.434	13.698	10.774	8.379	6.489	5.021	3.84	2.984	0	23.6657	15.1716	84.1027	71.4543	45.6058	29.4879	4.51305	-13.3456	-41.3688	-51.0907	0	0	0	0	0	0	0	168.196	109.419	112.035
					11.7144	91.04	87.773	78.006	68.132	58.267	49.231	40.607	33.44	27.022	21.837	17.346	13.636	10.718	8.341	6.44	4.978	3.793	2.906	0	23.5224	15.0905	84.1941	71.098	45.4654	29.248	4.53761	-13.202	-41.4656	-50.8328	0	0	0	0	0	0	0	167.656	109.062	111.678
					11.7352	90.6782	87.289	77.791	67.509	58.085	48.987	40.476	33.143	26.91	21.688	17.147	13.609	10.674	8.312	6.453	5.02	3.874	2.938	0	23.3927	15.0489	83.4242	70.8759	45.2401	29.1536	4.49731	-13.1473	-41.1827	-50.2496	0	0	0	0	0	0	0	167.053	108.664	111.281
					11.7561	90.3202	87.473	77.199	67.822	57.97	48.683	40.391	33.228	26.822	21.551	17.219	13.517	10.627	8.342	6.424	4.921	3.846	2.953	0	23.442	14.9344	83.811	70.7356	44.9593	29.0924	4.50884	-13.1043	-40.9225	-50.4606	0	0	0	0	0	0	0	166.996	108.627	111.243
					11.7769	89.9661	86.845	77.476	67.464	57.576	48.594	40.266	33.112	26.805	21.603	17.076	13.511	10.655	8.29	6.461	5.005	3.894	2.984	0	23.2737	14.988	83.3686	70.2548	44.8771	29.0024	4.4931	-13.096	-41.0213	-50.0416	0	0	0	0	0	0	0	166.099	108.035	110.651
					11.7977	89.616	86.803	77.366	67.13	57.67	48.447	40.167	32.75	26.832	21.48	17.107	13.497	10.58	8.303	6.466	5.018	3.898	3.016	0	23.2624	14.9667	82.9559	70.3695	44.7414	28.9311	4.44398	-13.1091	-40.7877	-50.1324	0	0	0	0	0	0	0	165.642	107.733	110.349
					11.8186	89.2702	86.348	76.607	67.163	57.276	48.28	40.096	32.989	26.506	21.382	17.098	13.417	10.619	8.244	6.408	5.021	3.87	3	0	23.1405	14.8199	82.9967	69.8887	44.5872	28.8799	4.47641	-12.9499	-40.6016	-50.106	0	0	0	0	0	0	0	165.132	107.396	110.013
					11.8394	88.9288	85.782	76.885	66.771	57.164	48.189	39.898	32.566	26.551	21.317	16.876	13.419	10.559	8.186	6.403	4.974	3.872	2.984	0	22.9888	14.8736	82.5123	69.7521	44.5031	28.7373	4.41901	-12.9719	-40.4782	-49.4555	0	0	0	0	0	0	0	164.881	107.231	109.847
					11.8602	88.5921	85.882	76.117	66.924	56.901	47.935	39.542	32.702	26.344	21.158	16.964	13.338	10.475	8.135	6.367	4.957	3.872	2.969	0	23.0156	14.7251	82.7013	69.4312	44.2685	28.4809	4.43747	-12.8707	-40.1763	-49.7133	0	0	0	0	0	0	0	164.3	106.847	109.464
					11.8811	88.2603	85.595	76.335	66.036	56.923	47.587	39.641	32.26	26.33	21.056	16.855	13.199	10.454	8.142	6.354	4.944	3.868	2.984	0	22.9387	14.7672	81.604	69.458	43.9472	28.5522	4.37749	-12.8639	-39.9826	-49.3939	0	0	0	0	0	0	0	163.404	106.256	108.873
					11.9019	87.9335	85.281	75.651	66.147	56.55	47.65	39.255	32.464	26.031	21.08	16.643	13.215	10.428	8.081	6.301	4.91	3.835	2.984	0	22.8545	14.6349	81.7412	69.0029	44.0053	28.2742	4.40517	-12.7178	-40.0282	-48.7726	0	0	0	0	0	0	0	163.4	106.253	108.869
					11.9227	87.6119	84.962	75.319	65.549	56.27	47.446	39.084	32.207	25.882	20.966	16.587	13.095	10.286	8	6.255	4.881	3.766	2.906	0	22.7691	14.5707	81.0022	68.6612	43.817	28.151	4.3703	-12.645	-39.8117	-48.6085	0	0	0	0	0	0	0	162.276	105.512	108.128
					11.9436	87.2958	84.104	75.01	65.569	56.097	47.227	38.876	31.97	25.795	20.783	16.601	13.002	10.276	8.021	6.267	4.828	3.769	2.953	0	22.5391	14.5109	81.0269	68.4501	43.6147	28.0012	4.33814	-12.6025	-39.4642	-48.6496	0	0	0	0	0	0	0	161.765	105.174	107.791
					11.9644	86.9853	84.417	74.853	65.283	55.972	46.912	38.799	31.999	25.783	20.812	16.576	13.107	10.301	8.026	6.292	4.935	3.823	2.953	0	22.623	14.4805	80.6735	68.2976	43.3238	27.9458	4.34207	-12.5966	-39.5193	-48.5763	0	0	0	0	0	0	0	160.994	104.665	107.282
					11.9852	86.6793	83.817	74.594	65.457	55.548	46.842	38.825	31.772	25.869	20.655	16.622	13.111	10.268	8.075	6.342	4.924	3.841	3	0	22.4622	14.4304	80.8885	67.7802	43.2591	27.9645	4.31127	-12.6387	-39.2212	-48.7111	0	0	0	0	0	0	0	160.525	104.356	106.972
					12.0061	86.3773	83.517	74.942	64.537	55.592	46.614	38.719	31.617	25.585	20.544	16.497	12.98	10.167	7.996	6.199	4.878	3.817	2.969	0	22.3818	14.4978	79.7516	67.8339	43.0486	27.8881	4.29024	-12.4999	-39.0104	-48.3448	0	0	0	0	0	0	0	159.837	103.902	106.518
					12.0269	86.0791	83.189	74.074	64.895	55.155	46.386	38.396	31.496	25.484	20.423	16.359	12.831	10.184	7.922	6.19	4.854	3.785	2.938	0	22.2939	14.3298	80.194	67.3007	42.838	27.6555	4.27382	-12.4506	-38.7806	-47.9404	0	0	0	0	0	0	0	159.714	103.821	106.437
					12.0477	85.7846	82.696	73.773	64.404	54.934	46.039	38.435	31.307	25.405	20.404	16.26	12.88	10.138	7.951	6.21	4.844	3.784	2.953	0	22.1618	14.2716	79.5872	67.031	42.5176	27.6836	4.24817	-12.412	-38.7445	-47.6503	0	0	0	0	0	0	0	158.694	103.147	105.764
					12.0686	85.4937	82.002	73.529	64.485	54.682	45.82	38.079	31.156	25.32	20.325	16.232	12.773	10.121	7.899	6.161	4.829	3.757	2.922	0	21.9758	14.2244	79.6873	66.7235	42.3153	27.4272	4.22768	-12.3704	-38.5945	-47.5682	0	0	0	0	0	0	0	158.048	102.721	105.337
					12.0894	85.2061	82.136	73.352	63.701	54.281	45.851	37.805	31.006	25.136	20.19	16.073	12.728	10.012	7.833	6.097	4.84	3.755	2.906	0	22.0117	14.1902	78.7185	66.2342	42.3439	27.2298	4.20733	-12.2805	-38.3382	-47.1022	0	0	0	0	0	0	0	157.215	102.171	104.787
					12.1102	84.9218	81.817	72.954	63.494	54.089	45.737	37.544	30.897	25.1	20.018	16.072	12.679	9.96	7.831	6.115	4.798	3.675	2.859	0	21.9262	14.1132	78.4627	65.9999	42.2387	27.0418	4.19254	-12.263	-38.0116	-47.0993	0	0	0	0	0	0	0	156.601	101.766	104.383
					12.1311	84.6406	81.031	72.561	63.334	54.152	45.336	37.691	30.634	24.919	19.898	15.898	12.516	9.903	7.745	5.997	4.712	3.689	2.828	0	21.7156	14.0371	78.265	66.0768	41.8683	27.1477	4.15685	-12.1745	-37.7837	-46.5894	0	0	0	0	0	0	0	156.72	101.844	104.461
					12.1519	84.3622	81.151	72.084	63.173	53.588	45.113	37.33	30.604	24.661	19.836	15.803	12.424	9.809	7.663	6.024	4.718	3.635	2.828	0	21.7477	13.9449	78.066	65.3886	41.6624	26.8877	4.15278	-12.0485	-37.666	-46.311	0	0	0	0	0	0	0	155.825	101.254	103.87
					12.1727	84.0868	80.619	72.458	62.587	53.696	44.99	37.103	30.421	24.665	19.807	15.768	12.459	9.824	7.693	6.014	4.691	3.677	2.859	0	21.6052	14.0172	77.3419	65.5204	41.5488	26.7242	4.12795	-12.0504	-37.6109	-46.2084	0	0	0	0	0	0	0	155.016	100.72	103.336
					12.1936	83.814	80.197	71.522	62.596	53.274	44.812	37.155	30.351	24.584	19.656	15.638	12.415	9.788	7.661	6.016	4.701	3.681	2.859	0	21.4921	13.8361	77.353	65.0055	41.3844	26.7616	4.11845	-12.0109	-37.3242	-45.8275	0	0	0	0	0	0	0	154.789	100.57	103.186
					12.2144	83.5437	80.307	71.397	62.087	53.084	44.637	36.866	30.207	24.378	19.648	15.677	12.336	9.787	7.605	5.996	4.674	3.661	2.844	0	21.5216	13.812	76.724	64.7736	41.2228	26.5535	4.09891	-11.9102	-37.309	-45.9418	0	0	0	0	0	0	0	153.545	99.7492	102.366
					12.2352	83.2758	79.629	71.03	62.192	52.95	44.296	36.892	30.004	24.422	19.553	15.62	12.301	9.742	7.609	5.984	4.678	3.653	2.844	0	21.3399	13.741	76.8538	64.6101	40.9079	26.5722	4.07136	-11.9317	-37.1286	-45.7747	0	0	0	0	0	0	0	153.261	99.5616	102.178
					12.2561	83.01	79.549	71.025	61.988	52.514	44.373	36.693	29.998	24.218	19.387	15.506	12.279	9.637	7.589	5.91	4.673	3.637	2.813	0	21.3184	13.74	76.6017	64.0781	40.979	26.4289	4.07055	-11.832	-36.8134	-45.4406	0	0	0	0	0	0	0	153.131	99.4754	102.092
					12.2769	82.7464	79.485	70.472	61.306	52.588	44.22	36.354	29.766	24.158	19.395	15.39	12.138	9.564	7.594	5.887	4.635	3.65	2.828	0	21.3013	13.633	75.7589	64.1684	40.8377	26.1847	4.03907	-11.8027	-36.8286	-45.1007	0	0	0	0	0	0	0	152.191	98.8554	101.472
					12.2977	82.4846	78.745	70.454	61.047	52.321	43.821	36.375	29.646	24.102	19.277	15.421	12.174	9.585	7.502	5.915	4.603	3.615	2.813	0	21.103	13.6295	75.4388	63.8426	40.4692	26.1998	4.02278	-11.7754	-36.6045	-45.1915	0	0	0	0	0	0	0	151.134	98.1579	100.774
					12.3186	82.2246	78.502	70.421	60.84	52.215	43.681	36.165	29.556	23.978	19.146	15.365	12.086	9.579	7.513	5.896	4.609	3.636	2.813	0	21.0378	13.6232	75.183	63.7133	40.3399	26.0486	4.01057	-11.7148	-36.3558	-45.0274	0	0	0	0	0	0	0	150.858	97.9758	100.592
					12.3394	81.9662	78.294	69.604	60.918	51.853	43.554	36.25	29.383	23.877	19.197	15.266	12.098	9.515	7.477	5.849	4.471	3.594	2.781	0	20.9821	13.4651	75.2794	63.2715	40.2226	26.1098	3.9871	-11.6654	-36.4526	-44.7373	0	0	0	0	0	0	0	150.462	97.7144	100.331
					12.3602	81.7093	77.99	69.033	60.669	51.63	43.411	35.77	29.307	23.701	19.104	15.179	11.981	9.491	7.434	5.844	4.501	3.607	2.797	0	20.9006	13.3546	74.9717	62.9994	40.0906	25.7641	3.97678	-11.5795	-36.276	-44.4824	0	0	0	0	0	0	0	149.72	97.2245	99.841
					12.3811	81.4537	77.53	69.418	60.221	51.469	43.215	35.557	29.171	23.735	18.982	15.08	11.945	9.495	7.388	5.796	4.561	3.565	2.797	0	20.7773	13.4291	74.4181	62.803	39.9096	25.6106	3.95833	-11.5961	-36.0444	-44.1922	0	0	0	0	0	0	0	149.073	96.7978	99.4142
					12.4019	81.1993	77.298	68.995	59.995	51.237	42.804	35.702	29.069	23.52	18.922	15.121	11.851	9.433	7.372	5.752	4.531	3.55	2.75	0	20.7152	13.3473	74.1388	62.5199	39.53	25.7151	3.94449	-11.491	-35.9304	-44.3124	0	0	0	0	0	0	0	148.177	96.2061	98.8225
					12.4227	80.9459	76.894	68.465	59.506	51.06	42.949	35.483	28.969	23.484	18.786	15.018	11.868	9.317	7.356	5.719	4.523	3.47	2.766	0	20.6069	13.2448	73.5345	62.3039	39.6639	25.5573	3.93092	-11.4734	-35.6722	-44.0105	0	0	0	0	0	0	0	147.686	95.8822	98.4986
					12.4436	80.6933	76.156	68.452	59.303	50.937	42.573	35.33	28.909	23.418	18.867	14.941	11.937	9.349	7.326	5.811	4.546	3.591	2.797	0	20.4091	13.2422	73.2837	62.1538	39.3167	25.4471	3.92278	-11.4412	-35.826	-43.7849	0	0	0	0	0	0	0	146.723	95.2467	97.8632
					12.4644	80.4415	76.443	67.974	59.142	50.747	42.457	35.142	28.845	23.371	18.661	14.959	11.815	9.419	7.346	5.809	4.533	3.586	2.781	0	20.486	13.1498	73.0847	61.922	39.2095	25.3117	3.91409	-11.4182	-35.4348	-43.8376	0	0	0	0	0	0	0	146.387	95.0249	97.6413
					12.4852	80.1902	75.533	67.844	58.916	50.329	42.3	35.156	28.657	23.367	18.574	14.935	11.773	9.375	7.336	5.778	4.544	3.593	2.797	0	20.2422	13.1246	72.8054	61.4119	39.0646	25.3218	3.88858	-11.4163	-35.2696	-43.7673	0	0	0	0	0	0	0	145.406	94.3772	96.9937
					12.5061	79.9394	75.215	67.001	58.55	50.13	42.127	34.809	28.517	23.202	18.581	14.776	11.748	9.263	7.317	5.769	4.517	3.55	2.781	0	20.1569	12.9615	72.3532	61.1691	38.9048	25.0719	3.86959	-11.3357	-35.2829	-43.3014	0	0	0	0	0	0	0	144.567	93.8236	96.44
					12.5269	79.6889	75.06	67.484	58.292	50.003	42.249	34.655	28.425	23.034	18.62	14.769	11.714	9.285	7.293	5.761	4.537	3.574	2.781	0	20.1154	13.055	72.0343	61.0142	39.0175	24.961	3.8571	-11.2536	-35.357	-43.2808	0	0	0	0	0	0	0	144.163	93.5569	96.1733
					12.5477	79.4385	74.856	66.52	58.269	49.801	41.87	34.637	28.363	22.976	18.444	14.74	11.635	9.272	7.306	5.737	4.509	3.527	2.766	0	20.0607	12.8685	72.0059	60.7677	38.6674	24.948	3.84869	-11.2252	-35.0228	-43.1959	0	0	0	0	0	0	0	143.723	93.2665	95.883
					12.5686	79.188	74.353	66.418	57.772	49.621	41.729	34.327	28.14	22.906	18.489	14.647	11.657	9.218	7.233	5.695	4.492	3.5	2.781	0	19.9259	12.8488	71.3917	60.548	38.5372	24.7247	3.81843	-11.191	-35.1082	-42.9233	0	0	0	0	0	0	0	142.572	92.507	95.1235
					12.5894	78.9374	74.075	66.482	57.59	49.487	41.359	34.289	28.168	22.841	18.285	14.667	11.563	9.248	7.227	5.701	4.487	3.539	2.75	0	19.8514	12.8611	71.1668	60.3845	38.1955	24.6973	3.82223	-11.1593	-34.7208	-42.9819	0	0	0	0	0	0	0	142.117	92.2065	94.823
					12.6102	78.6865	73.732	65.752	57.371	49.249	41.163	34.219	27.941	22.631	18.283	14.619	11.544	9.162	7.191	5.666	4.476	3.504	2.719	0	19.7595	12.7199	70.8962	60.0941	38.0145	24.6469	3.79143	-11.0567	-34.717	-42.8413	0	0	0	0	0	0	0	141.308	91.6723	94.2888
					12.6311	78.4351	73.661	65.59	57.465	48.896	41.082	34.071	27.94	22.579	18.249	14.534	11.53	9.165	7.189	5.687	4.448	3.447	2.766	0	19.7405	12.6886	71.0124	59.6634	37.9397	24.5403	3.79129	-11.0313	-34.6525	-42.5922	0	0	0	0	0	0	0	141.1	91.5354	94.1519
					12.6519	78.1831	73.302	65.414	56.757	48.999	40.974	33.892	27.852	22.514	18.248	14.456	11.444	9.125	7.198	5.658	4.5	3.518	2.766	0	19.6443	12.6545	70.1375	59.7891	37.84	24.4114	3.77935	-10.9995	-34.6506	-42.3636	0	0	0	0	0	0	0	140.242	90.9693	93.5857
					12.6727	77.9303	72.99	64.537	56.803	48.582	40.868	33.952	27.642	22.584	18.123	14.39	11.463	9.104	7.18	5.635	4.444	3.512	2.734	0	19.5607	12.4849	70.1943	59.2802	37.7421	24.4546	3.75085	-11.0337	-34.4132	-42.1702	0	0	0	0	0	0	0	139.851	90.7106	93.3271
					12.6936	77.6767	72.105	64.837	56.489	48.106	40.683	33.714	27.542	22.433	18.107	14.382	11.47	9.092	7.182	5.623	4.459	3.505	2.75	0	19.3235	12.5429	69.8063	58.6994	37.5712	24.2832	3.73728	-10.96	-34.3828	-42.1467	0	0	0	0	0	0	0	138.474	89.8023	92.4188
					12.7144	77.4219	72.464	64.149	56.283	48.317	40.647	33.515	27.598	22.362	17.891	14.386	11.395	9.026	7.153	5.598	4.417	3.483	2.703	0	19.4197	12.4098	69.5517	58.9569	37.538	24.1398	3.74488	-10.9253	-33.9727	-42.1585	0	0	0	0	0	0	0	138.704	89.9542	92.5707
					12.7352	77.166	71.566	64.392	55.924	47.827	40.451	33.375	27.416	22.309	17.97	14.285	11.349	9.022	7.098	5.612	4.417	3.498	2.719	0	19.179	12.4568	69.1081	58.359	37.357	24.039	3.72019	-10.8994	-34.1227	-41.8625	0	0	0	0	0	0	0	137.335	89.0501	91.6666
					12.7561	76.9087	71.055	63.949	55.56	47.909	40.067	33.402	27.328	22.135	17.784	14.27	11.331	9.022	7.101	5.608	4.412	3.486	2.734	0	19.0421	12.3711	68.6583	58.459	37.0024	24.0585	3.70825	-10.8144	-33.7695	-41.8185	0	0	0	0	0	0	0	136.897	88.7615	91.3779
					12.7769	76.6498	70.731	63.439	55.254	47.741	39.948	33.176	27.245	22.103	17.715	14.169	11.274	8.998	7.004	5.58	4.383	3.491	2.734	0	18.9553	12.2725	68.2801	58.254	36.8925	23.8957	3.69698	-10.7987	-33.6385	-41.5225	0	0	0	0	0	0	0	136.287	88.3589	90.9754
					12.7977	76.3893	70.792	63.203	55.088	47.37	39.803	33.017	27.131	22.055	17.626	14.204	11.259	8.975	7.036	5.593	4.385	3.478	2.719	0	18.9716	12.2268	68.075	57.8013	36.7585	23.7812	3.68151	-10.7753	-33.4695	-41.6251	0	0	0	0	0	0	0	135.426	87.7905	90.407
					12.8186	76.1271	70.026	62.876	54.843	47.122	39.626	32.973	26.931	21.903	17.672	14.158	11.248	8.893	7.056	5.536	4.408	3.473	2.719	0	18.7663	12.1636	67.7722	57.4987	36.5951	23.7495	3.65438	-10.701	-33.5568	-41.4903	0	0	0	0	0	0	0	134.452	87.1474	89.7638
					12.8394	75.8629	69.576	62.523	54.961	46.824	39.566	32.847	26.892	21.891	17.743	14.105	11.233	8.929	7.002	5.568	4.412	3.474	2.703	0	18.6457	12.0953	67.9181	57.1351	36.5397	23.6587	3.64908	-10.6952	-33.6917	-41.335	0	0	0	0	0	0	0	133.92	86.7964	89.4129
					12.8602	75.5966	69.569	62.458	54.476	46.608	39.499	32.674	26.832	21.826	17.571	14.085	11.23	8.923	6.981	5.541	4.399	3.459	2.719	0	18.6439	12.0827	67.3187	56.8715	36.4778	23.5341	3.64094	-10.6634	-33.365	-41.2764	0	0	0	0	0	0	0	133.265	86.3641	88.9806
					12.8811	75.328	69.027	62.039	54.298	46.732	39.067	32.712	26.722	21.747	17.426	14.05	11.185	8.874	6.981	5.537	4.398	3.442	2.719	0	18.4986	12.0016	67.0988	57.0229	36.0788	23.5615	3.62602	-10.6248	-33.0897	-41.1738	0	0	0	0	0	0	0	133	86.1892	88.8057
					12.9019	75.0571	68.556	61.689	53.944	46.182	38.916	32.37	26.604	21.515	17.412	13.995	11.095	8.829	6.996	5.506	4.386	3.442	2.703	0	18.3724	11.9339	66.6613	56.3517	35.9394	23.3151	3.61	-10.5115	-33.0631	-41.0126	0	0	0	0	0	0	0	131.597	85.2631	87.8796
					12.9227	74.7837	68.105	61.277	53.853	46.097	38.823	32.474	26.425	21.603	17.374	13.897	11.076	8.825	6.976	5.534	4.403	3.439	2.719	0	18.2515	11.8542	66.5488	56.248	35.8535	23.39	3.58571	-10.5544	-32.991	-40.7254	0	0	0	0	0	0	0	131.461	85.1736	87.79
					12.9436	74.5096	68.24	61.064	53.72	45.775	38.954	32.175	26.415	21.604	17.263	13.994	11.065	8.858	6.974	5.539	4.382	3.445	2.719	0	18.2877	11.813	66.3845	55.8551	35.9745	23.1747	3.58436	-10.5549	-32.7802	-41.0097	0	0	0	0	0	0	0	130.729	84.6905	87.3069
					12.9644	74.2351	67.552	60.968	53.195	45.529	38.667	32	26.244	21.273	17.298	13.84	10.95	8.703	6.937	5.448	4.315	3.394	2.641	0	18.1033	11.7944	65.7357	55.5549	35.7094	23.0486	3.56115	-10.3932	-32.8467	-40.5584	0	0	0	0	0	0	0	129.709	84.0175	86.634
					12.9852	73.9602	67.002	60.597	53.012	45.717	38.329	31.902	26.205	21.368	17.218	13.833	11.096	8.763	6.995	5.506	4.374	3.413	2.672	0	17.9559	11.7227	65.5096	55.7843	35.3973	22.9781	3.55586	-10.4396	-32.6947	-40.5379	0	0	0	0	0	0	0	129.231	83.7021	86.3185
					13.0061	73.6844	67.292	60.073	52.897	45.283	38.481	31.798	26.171	21.303	17.173	13.785	11.032	8.693	6.949	5.5	4.358	3.422	2.641	0	18.0337	11.6213	65.3675	55.2548	35.5377	22.9031	3.55125	-10.4079	-32.6093	-40.3972	0	0	0	0	0	0	0	128.855	83.4535	86.07
					13.0269	73.4087	66.626	59.815	52.547	45.134	38.021	31.823	26.01	21.279	17.175	13.784	11.06	8.734	6.889	5.414	4.309	3.397	2.703	0	17.8552	11.5714	64.935	55.073	35.1128	22.9212	3.5294	-10.3962	-32.6131	-40.3943	0	0	0	0	0	0	0	127.594	82.6216	85.238
					13.0478	73.1325	66.041	59.888	52.421	44.998	37.821	31.724	25.992	21.04	17.1	13.651	10.96	8.631	6.858	5.362	4.279	3.345	2.688	0	17.6984	11.5855	64.7793	54.907	34.9281	22.8498	3.52696	-10.2794	-32.4707	-40.0045	0	0	0	0	0	0	0	127.521	82.5728	85.1893
					13.0686	72.856	66.027	59.732	52.144	44.891	37.849	31.542	25.965	21.045	17.029	13.589	10.911	8.636	6.872	5.455	4.325	3.36	2.656	0	17.6946	11.5553	64.4369	54.7764	34.954	22.7188	3.52329	-10.2818	-32.3359	-39.8228	0	0	0	0	0	0	0	127.219	82.3738	84.9902
					13.0895	72.5791	65.511	59.111	51.875	44.726	37.749	31.306	25.789	21.075	16.914	13.592	10.937	8.589	6.85	5.409	4.269	3.348	2.578	0	17.5564	11.4352	64.1045	54.5751	34.8617	22.5488	3.49941	-10.2965	-32.1175	-39.8316	0	0	0	0	0	0	0	126.335	81.7907	84.4072
					13.1103	72.3018	65.903	58.968	51.705	44.374	37.565	31.358	25.689	20.9	16.988	13.523	10.866	8.589	6.826	5.358	4.249	3.304	2.609	0	17.6614	11.4075	63.8945	54.1456	34.6917	22.5862	3.48584	-10.211	-32.258	-39.6294	0	0	0	0	0	0	0	125.774	81.4204	84.0369
					13.1311	72.0241	65.312	58.741	51.276	44.47	37.462	31.245	25.561	20.93	16.918	13.548	10.792	8.599	6.776	5.333	4.229	3.293	2.594	0	17.503	11.3636	63.3643	54.2627	34.5966	22.5048	3.46847	-10.2256	-32.1251	-39.7027	0	0	0	0	0	0	0	125.01	80.916	83.5325
					13.152	71.7461	64.588	58.57	51.447	44.076	37.385	31.072	25.506	20.777	16.839	13.496	10.695	8.574	6.754	5.333	4.194	3.3	2.563	0	17.309	11.3305	63.5756	53.782	34.5255	22.3802	3.46101	-10.1509	-31.9751	-39.5503	0	0	0	0	0	0	0	124.688	80.7031	83.3196
					13.1728	71.4676	64.943	58.168	51.013	44.226	37.085	31.074	25.533	20.843	16.829	13.483	10.688	8.619	6.776	5.318	4.14	3.269	2.484	0	17.4041	11.2528	63.0393	53.965	34.2484	22.3817	3.46467	-10.1831	-31.9561	-39.5122	0	0	0	0	0	0	0	124.105	80.3183	82.9348
					13.1936	71.1888	64.467	57.911	50.986	43.552	37.065	30.934	25.468	20.724	16.726	13.394	10.72	8.529	6.764	5.311	4.184	3.312	2.594	0	17.2766	11.2031	63.0059	53.1426	34.23	22.2808	3.45585	-10.125	-31.7605	-39.2514	0	0	0	0	0	0	0	123.458	79.8915	82.508
					13.2145	70.9096	64.371	57.56	50.912	43.735	36.893	30.791	25.486	20.693	16.684	13.39	10.809	8.547	6.733	5.327	4.17	3.261	2.563	0	17.2508	11.1352	62.9145	53.3659	34.0711	22.1778	3.4583	-10.1099	-31.6807	-39.2397	0	0	0	0	0	0	0	123.343	79.8159	82.4324
					13.2353	70.63	63.57	57.495	50.478	43.318	36.975	30.713	25.278	20.691	16.665	13.322	10.722	8.502	6.789	5.402	4.239	3.343	2.609	0	17.0362	11.1226	62.3782	52.8571	34.1469	22.1217	3.43007	-10.1089	-31.6447	-39.0404	0	0	0	0	0	0	0	122.299	79.1264	81.7429
					13.2561	70.35	63.552	57.269	50.724	43.383	36.933	30.712	25.373	20.602	16.666	13.485	10.727	8.544	6.709	5.236	4.147	3.274	2.578	0	17.0314	11.0789	62.6822	52.9364	34.1081	22.1209	3.44296	-10.0654	-31.6466	-39.5181	0	0	0	0	0	0	0	122.171	79.042	81.6584
					13.277	70.0696	63.379	57.236	50.114	43.256	36.81	30.728	25.148	20.747	16.503	13.32	10.707	8.535	6.745	5.296	4.2	3.302	2.625	0	16.985	11.0725	61.9284	52.7814	33.9945	22.1325	3.41243	-10.1362	-31.3371	-39.0345	0	0	0	0	0	0	0	121.799	78.7965	81.413
					13.2978	69.7888	63.216	56.888	50.234	43.14	36.684	30.507	25.374	20.6	16.731	13.429	10.649	8.477	6.769	5.362	4.174	3.292	2.547	0	16.9413	11.0052	62.0767	52.6399	33.8781	21.9733	3.4431	-10.0644	-31.77	-39.354	0	0	0	0	0	0	0	120.769	78.1169	80.7334
					13.3186	69.5077	62.518	56.606	49.978	42.933	36.456	30.481	25.115	20.438	16.544	13.343	10.622	8.377	6.593	5.251	4.2	3.322	2.578	0	16.7543	10.9506	61.7603	52.3873	33.6676	21.9545	3.40795	-9.98527	-31.4149	-39.1019	0	0	0	0	0	0	0	120.38	77.8604	80.4768
					13.3395	69.2262	62.732	56.484	49.685	42.88	36.345	30.491	25.07	20.456	16.515	13.363	10.619	8.49	6.682	5.295	4.213	3.264	2.531	0	16.8116	10.927	61.3982	52.3226	33.565	21.9618	3.40185	-9.99407	-31.3598	-39.1605	0	0	0	0	0	0	0	119.874	77.5259	80.1424
					13.3603	68.9442	62.453	56.023	49.744	42.544	36.298	30.337	24.922	20.412	16.574	13.276	10.614	8.43	6.668	5.278	4.16	3.31	2.578	0	16.7368	10.8378	61.4711	51.9126	33.5216	21.8508	3.38177	-9.97257	-31.4719	-38.9056	0	0	0	0	0	0	0	119.363	77.1886	79.8051
					13.3811	68.6619	62.016	56.143	49.433	42.7	36.158	30.192	24.944	20.416	16.589	13.274	10.618	8.437	6.583	5.298	4.188	3.357	2.594	0	16.6197	10.861	61.0868	52.103	33.3923	21.7464	3.38475	-9.97452	-31.5004	-38.8997	0	0	0	0	0	0	0	118.819	76.8301	79.4466
					13.402	68.3793	61.822	55.936	49.081	42.614	36.193	30.221	24.917	20.377	16.519	13.311	10.516	8.448	6.704	5.232	4.167	3.267	2.531	0	16.5677	10.821	60.6518	51.998	33.4247	21.7673	3.38109	-9.95547	-31.3674	-39.0082	0	0	0	0	0	0	0	118.281	76.4745	79.0909
					13.4228	68.0961	61.593	55.745	48.832	42.393	35.914	30.096	24.821	20.258	16.453	13.185	10.449	8.485	6.67	5.233	4.147	3.274	2.563	0	16.5064	10.784	60.3441	51.7284	33.167	21.6772	3.36806	-9.89733	-31.2421	-38.6389	0	0	0	0	0	0	0	117.797	76.1552	78.7717
					13.4436	67.8126	61.321	55.355	48.752	42.425	35.894	30.106	24.851	20.298	16.431	13.158	10.334	8.379	6.742	5.299	4.157	3.312	2.578	0	16.4335	10.7086	60.2453	51.7674	33.1485	21.6844	3.37213	-9.91687	-31.2003	-38.5598	0	0	0	0	0	0	0	117.683	76.08	78.6965
					13.4645	67.5288	61.075	55.214	48.588	42.018	35.956	29.947	24.797	20.375	16.453	13.258	10.661	8.495	6.671	5.229	4.177	3.258	2.547	0	16.3676	10.6813	60.0426	51.2708	33.2058	21.5699	3.3648	-9.95449	-31.2421	-38.8528	0	0	0	0	0	0	0	116.453	75.2685	77.885
					13.4853	67.2446	60.668	54.797	48.544	42.217	35.621	29.912	24.772	20.344	16.439	13.266	10.668	8.46	6.679	5.341	4.221	3.351	2.594	0	16.2585	10.6006	59.9882	51.5136	32.8964	21.5447	3.36141	-9.93935	-31.2155	-38.8763	0	0	0	0	0	0	0	116.132	75.0567	77.6731
					13.5061	66.96	60.653	54.619	48.345	41.909	35.628	29.905	24.804	20.352	16.402	13.257	10.638	8.506	6.731	5.333	4.25	3.315	2.594	0	16.2545	10.5662	59.7423	51.1378	32.9029	21.5397	3.36575	-9.94325	-31.1453	-38.8499	0	0	0	0	0	0	0	115.571	74.6859	77.3024
					13.527	66.6751	60.331	54.673	48.019	41.782	35.698	29.814	24.732	20.25	16.364	13.167	10.617	8.462	6.777	5.342	4.217	3.274	2.594	0	16.1682	10.5767	59.3395	50.9828	32.9675	21.4741	3.35598	-9.89342	-31.0731	-38.5862	0	0	0	0	0	0	0	115.312	74.5153	77.1317
					13.5478	66.3898	60.07	54.347	48.135	41.745	35.491	29.679	24.637	20.353	16.369	13.229	10.608	8.473	6.711	5.288	4.188	3.312	2.578	0	16.0982	10.5136	59.4828	50.9377	32.7764	21.3769	3.34309	-9.94374	-31.0826	-38.7678	0	0	0	0	0	0	0	114.734	74.134	76.7505
					13.5686	66.1041	59.584	54.088	47.98	41.331	35.289	29.69	24.544	20.234	16.321	13.204	10.573	8.459	6.731	5.338	4.22	3.364	2.641	0	15.968	10.4635	59.2913	50.4325	32.5898	21.3848	3.33047	-9.8856	-30.9915	-38.6946	0	0	0	0	0	0	0	113.889	73.5758	76.1923
					13.5895	65.818	59.458	53.99	47.643	41.494	35.012	29.703	24.533	20.15	16.381	13.276	10.642	8.56	6.723	5.344	4.23	3.327	2.578	0	15.9342	10.4445	58.8748	50.6314	32.334	21.3942	3.32898	-9.84456	-31.1054	-38.9056	0	0	0	0	0	0	0	113.087	73.0464	75.6629
					13.6103	65.5316	59.163	53.519	47.582	41.442	35.078	29.514	24.507	20.211	16.321	13.182	10.535	8.459	6.706	5.329	4.214	3.277	2.594	0	15.8552	10.3534	58.7995	50.5679	32.395	21.258	3.32545	-9.87437	-30.9915	-38.6301	0	0	0	0	0	0	0	113.058	73.0279	75.6444
					13.6311	65.2448	58.926	53.33	47.378	41.117	35.182	29.478	24.393	20.13	16.438	13.205	10.603	8.459	6.75	5.324	4.23	3.349	2.594	0	15.7916	10.3168	58.5474	50.1714	32.491	21.2321	3.30998	-9.83479	-31.2136	-38.6975	0	0	0	0	0	0	0	112.114	72.4048	75.0213
					13.652	64.9576	58.81	53.287	47.359	41.045	35.166	29.416	24.435	19.994	16.246	13.104	10.505	8.462	6.715	5.368	4.273	3.364	2.656	0	15.7606	10.3085	58.5239	50.0835	32.4762	21.1875	3.31568	-9.76835	-30.849	-38.4015	0	0	0	0	0	0	0	112.637	72.7497	75.3661
					13.6728	64.67	58.48	52.814	47.123	40.993	34.535	29.371	24.33	20.028	16.351	13.086	10.532	8.435	6.703	5.232	4.208	3.338	2.609	0	15.6721	10.217	58.2322	50.0201	31.8935	21.1551	3.30144	-9.78496	-31.0484	-38.3488	0	0	0	0	0	0	0	111.309	71.8734	74.4899
					13.6936	64.3821	58.063	52.891	46.802	40.808	34.809	29.336	24.361	19.944	16.284	13.201	10.576	8.489	6.707	5.334	4.231	3.359	2.547	0	15.5604	10.2319	57.8356	49.7943	32.1465	21.1298	3.30564	-9.74392	-30.9212	-38.6858	0	0	0	0	0	0	0	110.653	71.4405	74.0569
					13.7145	64.0938	57.957	52.398	46.542	40.67	34.611	29.229	24.192	19.899	16.29	13.171	10.493	8.435	6.686	5.295	4.237	3.323	2.625	0	15.532	10.1366	57.5143	49.6259	31.9637	21.0528	3.28271	-9.72194	-30.9326	-38.5979	0	0	0	0	0	0	0	109.855	70.9139	73.5304
					13.7353	63.8051	57.565	52.328	46.748	40.389	34.709	29.102	24.202	19.99	16.131	13.181	10.501	8.448	6.711	5.293	4.073	3.304	2.594	0	15.4269	10.123	57.7688	49.2831	32.0542	20.9613	3.28407	-9.76639	-30.6307	-38.6272	0	0	0	0	0	0	0	109.877	70.9282	73.5446
					13.7561	63.5161	57.448	52.12	46.322	40.492	34.417	29.061	24.185	19.968	16.174	13.142	10.584	8.457	6.699	5.317	4.215	3.297	2.609	0	15.3955	10.0828	57.2424	49.4087	31.7845	20.9318	3.28176	-9.75565	-30.7123	-38.5129	0	0	0	0	0	0	0	109.147	70.4461	73.0625
					13.777	63.2267	57.251	52.205	46.015	40.411	34.295	29.063	24.177	19.876	16.345	13.182	10.54	8.484	6.734	5.36	4.244	3.341	2.609	0	15.3428	10.0992	56.863	49.3099	31.6718	20.9332	3.28067	-9.7107	-31.037	-38.6301	0	0	0	0	0	0	0	108.123	69.7703	72.3868
					13.7978	62.937	57.039	51.808	46.14	40.099	34.349	28.97	24.093	19.802	16.144	13.178	10.505	8.443	6.728	5.317	4.225	3.337	2.625	0	15.2859	10.0224	57.0175	48.9292	31.7217	20.8662	3.26928	-9.67454	-30.6554	-38.6184	0	0	0	0	0	0	0	108.164	69.7975	72.414
					13.8186	62.6468	56.626	51.67	45.771	40.012	34.315	28.947	24.121	19.796	16.196	13.117	10.52	8.491	6.704	5.333	4.241	3.347	2.625	0	15.1753	9.99572	56.5615	48.823	31.6903	20.8497	3.27307	-9.67161	-30.7541	-38.4396	0	0	0	0	0	0	0	107.503	69.3614	71.9779
					13.8395	62.3563	56.272	51.411	45.556	39.929	34.212	28.818	24.097	19.819	16.187	13.091	10.533	8.416	6.674	5.37	4.229	3.352	2.609	0	15.0804	9.94561	56.2958	48.7218	31.5952	20.7567	3.26982	-9.68285	-30.737	-38.3634	0	0	0	0	0	0	0	106.882	68.9515	71.5679
					13.8603	62.0655	56.287	51.471	45.732	39.75	34.491	28.932	24.214	19.921	16.32	13.201	10.676	8.546	6.734	5.394	4.139	3.349	2.578	0	15.0844	9.95722	56.5133	48.5033	31.8529	20.8389	3.28569	-9.73268	-30.9896	-38.6858	0	0	0	0	0	0	0	106.628	68.7836	71.4
					13.8811	61.7743	55.792	50.964	45.171	39.388	33.915	28.692	23.923	19.807	16.133	13.171	10.534	8.472	6.776	5.376	4.309	3.361	2.656	0	14.9518	9.85914	55.8201	48.0616	31.3209	20.666	3.24621	-9.67699	-30.6345	-38.5979	0	0	0	0	0	0	0	105.016	67.7201	70.3366
[truncated: 32 more columns]

## Sheet: Clone B-1 (Test set)
CLONE B-1			toff	VCCoff	t	VCC	FG_Perm_1 pF/cm	FG_Perm_2 pF/cm	FG_Perm_3 pF/cm	FG_Perm_4 pF/cm	FG_Perm_5 pF/cm	FG_Perm_6 pF/cm	FG_Perm_7 pF/cm	FG_Perm_8 pF/cm	FG_Perm_9 pF/cm	FG_Perm_10 pF/cm	FG_Perm_11 pF/cm	FG_Perm_12 pF/cm	FG_Perm_13 pF/cm	FG_Perm_14 pF/cm	FG_Perm_15 pF/cm	FG_Perm_16 pF/cm	FG_Perm_17 pF/cm	Intercept	FQ1	FQ2	FQ3	FQ4	FQ5	FQ6	FQ7	FQ8	FQ9	FQ10	FQ11	FQ12	FQ13	FQ14	FQ15	FQ16	FQ17	premodel1	premodel2	Clone B model	Yoffset1 (d1)	Yoffset2 (d2)	k at beginning	set this factor	RMSE (VCC) PLS
			0	6.876	0.00581019	6.90274	4.234	3.708	3.167	2.615	2.136	1.676	1.319	1.009	0.788972	0.645256	0.496868	0.395433	0.332525	0.279846	0.2398	0.201353	0.188477	0	1.13467	0.717324	3.91362	3.19085	1.97262	1.20717	0.17898	-0.492961	-1.49816	-1.89094	0	0	0	0	0	0	0	8.43319	6.90274	6.76283	-1.53045	-0.139906	1	1.00759	16.8277
			0.920139	13.944	0.0266435	7.00099	4.383	3.836	3.255	2.72	2.226	1.762	1.382	1.073	0.845528	0.671992	0.540589	0.438103	0.370237	0.326038	0.319135	0.23691	0.213867	0	1.1746	0.742086	4.02237	3.31897	2.05574	1.26912	0.187529	-0.524229	-1.60555	-1.96929	0	0	0	0	0	0	0	8.67135	7.1409	7.00099
			1.95486	28.716	0.0474884	7.10296	4.52	3.939	3.391	2.789	2.264	1.789	1.395	1.09	0.851028	0.669885	0.532213	0.442317	0.361195	0.301069	0.369107	0.214521	0.196289	0	1.21132	0.762011	4.19043	3.40317	2.09083	1.28856	0.189293	-0.532535	-1.61599	-1.96311	0	0	0	0	0	0	0	9.02397	7.49352	7.35362
			2.91667	50.592	0.0683218	7.20849	4.625	4.019	3.462	2.829	2.267	1.812	1.395	1.103	0.838502	0.658349	0.523483	0.420852	0.362249	0.287407	0.242125	0.207284	0.180664	0	1.23946	0.777488	4.27817	3.45197	2.0936	1.30513	0.189293	-0.538886	-1.59221	-1.9293	0	0	0	0	0	0	0	9.27471	7.74426	7.60436
			3.96042	72.876	0.0891551	7.31758	4.76	4.131	3.485	2.891	2.344	1.831	1.425	1.101	0.838978	0.659639	0.524094	0.422616	0.337679	0.278274	0.243869	0.211274	0.174805	0	1.27564	0.799154	4.30659	3.52763	2.16471	1.31881	0.193364	-0.537909	-1.59311	-1.93308	0	0	0	0	0	0	0	9.52179	7.99134	7.85144
			4.91458	101.458	0.109988	7.43016	4.815	4.215	3.547	2.956	2.365	1.872	1.443	1.11	0.862771	0.676222	0.529775	0.429817	0.354506	0.298109	0.256461	0.206621	0.237305	0	1.29038	0.815404	4.38321	3.60694	2.18411	1.34835	0.195806	-0.542306	-1.63829	-1.98168	0	0	0	0	0	0	0	9.66191	8.13146	7.99155
			5.93056	145.088	0.130822	7.54619	4.93	4.247	3.591	2.958	2.392	1.889	1.46	1.133	0.877144	0.686488	0.556562	0.438114	0.359254	0.297384	0.257485	0.212938	0.193359	0	1.3212	0.821595	4.43758	3.60938	2.20904	1.36059	0.198113	-0.553543	-1.66558	-2.01177	0	0	0	0	0	0	0	9.7266	8.19615	8.05624
			6.94653	172.09	0.151655	7.66562	4.952	4.308	3.617	2.988	2.413	1.891	1.469	1.134	0.881146	0.68731	0.539757	0.440835	0.368676	0.301189	0.250401	0.214609	0.188477	0	1.32709	0.833396	4.46971	3.64599	2.22843	1.36203	0.199334	-0.554032	-1.67318	-2.01418	0	0	0	0	0	0	0	9.82459	8.29414	8.15424
			7.95208	159.47	0.172488	7.78838	5.036	4.362	3.659	3.031	2.422	1.906	1.464	1.135	0.871681	0.68144	0.542332	0.44599	0.36265	0.311478	0.255168	0.209453	0.204102	0	1.3496	0.843842	4.52161	3.69846	2.23675	1.37283	0.198656	-0.55452	-1.65521	-1.99697	0	0	0	0	0	0	0	10.015	8.48459	8.34469
			8.94444	125.048	0.193322	7.91442	5.108	4.417	3.716	3.035	2.461	1.936	1.474	1.134	0.883648	0.711615	0.546294	0.464897	0.381422	0.297983	0.267174	0.209588	0.183594	0	1.3689	0.854482	4.59205	3.70334	2.27276	1.39444	0.200013	-0.554032	-1.67793	-2.0854	0	0	0	0	0	0	0	10.0686	8.53817	8.39826
			9.93611	100.451	0.214155	8.04368	5.19	4.497	3.738	3.062	2.453	1.906	1.457	1.112	0.854071	0.654563	0.52296	0.404105	0.331872	0.264916	0.229001	0.228134	0.168945	0	1.39087	0.869958	4.61923	3.73628	2.26537	1.37283	0.197706	-0.543283	-1.62177	-1.91821	0	0	0	0	0	0	0	10.369	8.83855	8.69864
			10.9333	82.014	0.234988	8.17612	5.296	4.527	3.768	3.109	2.463	1.917	1.462	1.112	0.838732	0.641315	0.499404	0.389391	0.323583	0.248587	0.209338	0.171116	0.167969	0	1.41928	0.875762	4.65631	3.79363	2.27461	1.38076	0.198385	-0.543283	-1.59264	-1.87938	0	0	0	0	0	0	0	10.5834	9.05297	8.91307
			11.925	79.815	0.255822	8.31168	5.401	4.596	3.868	3.168	2.508	1.957	1.5	1.143	0.869296	0.674688	0.516545	0.421348	0.332454	0.273495	0.226875	0.18418	0.155273	0	1.44742	0.88911	4.77988	3.86563	2.31617	1.40957	0.203541	-0.558429	-1.65068	-1.97719	0	0	0	0	0	0	0	10.725	9.19457	9.05466
			12.9194	72.006	0.276655	8.4503	5.487	4.671	3.917	3.197	2.549	2.007	1.512	1.158	0.902078	0.677133	0.53474	0.427266	0.339147	0.272385	0.24232	0.190949	0.172852	0	1.47047	0.903619	4.84043	3.90101	2.35403	1.44558	0.205169	-0.565757	-1.71293	-1.98435	0	0	0	0	0	0	0	10.8573	9.32682	9.18692
			13.9132	67.127	0.297488	8.59192	5.595	4.808	3.987	3.258	2.603	2.005	1.559	1.166	0.889202	0.672698	0.529819	0.420483	0.322303	0.279478	0.226542	0.204784	0.150391	0	1.49941	0.930122	4.92694	3.97544	2.4039	1.44414	0.211547	-0.569666	-1.68848	-1.97135	0	0	0	0	0	0	0	11.162	9.63155	9.49165
					0.318391	8.73699	5.704	4.866	4.045	3.299	2.628	2.046	1.552	1.177	0.916439	0.680295	0.549214	0.414505	0.390472	0.264906	0.222717	0.174635	0.143555	0	1.52862	0.941342	4.99861	4.02547	2.42699	1.47367	0.210597	-0.57504	-1.7402	-1.99362	0	0	0	0	0	0	0	11.2964	9.766	9.62609
					0.339248	8.88464	5.762	4.922	4.121	3.326	2.649	2.06	1.563	1.191	0.886741	0.673097	0.524869	0.412656	0.320624	0.268267	0.228084	0.185677	0.172852	0	1.54416	0.952176	5.09253	4.05842	2.44638	1.48376	0.21209	-0.58188	-1.68381	-1.97253	0	0	0	0	0	0	0	11.5513	10.0209	9.88095
					0.360081	9.03497	5.847	5.025	4.185	3.388	2.693	2.094	1.598	1.205	0.908066	0.689711	0.543575	0.420828	0.344471	0.269088	0.223585	0.185393	0.145508	0	1.56694	0.972101	5.17161	4.13407	2.48702	1.50825	0.216839	-0.58872	-1.7243	-2.02121	0	0	0	0	0	0	0	11.7226	10.1922	10.0522
					0.380914	9.18809	6.028	5.106	4.295	3.473	2.765	2.126	1.651	1.254	0.930354	0.711691	0.560458	0.441249	0.341932	0.280552	0.242104	0.203176	0.155273	0	1.61545	0.987771	5.30755	4.23779	2.55351	1.53129	0.224031	-0.612659	-1.76662	-2.08563	0	0	0	0	0	0	0	11.9925	10.462	10.3221
					0.401748	9.34395	6.089	5.212	4.33	3.542	2.8	2.177	1.666	1.281	0.956811	0.731011	0.579019	0.450897	0.367201	0.289948	0.243856	0.194396	0.160156	0	1.6318	1.00828	5.3508	4.32198	2.58583	1.56803	0.226066	-0.62585	-1.81686	-2.14224	0	0	0	0	0	0	0	12.1078	10.5774	10.4375
					0.422581	9.50248	6.278	5.328	4.458	3.619	2.874	2.233	1.696	1.307	0.990124	0.756709	0.587749	0.478956	0.377868	0.297661	0.260553	0.208466	0.168945	0	1.68245	1.03072	5.50897	4.41594	2.65417	1.60836	0.230137	-0.638553	-1.88012	-2.21755	0	0	0	0	0	0	0	12.3945	10.8641	10.7242
					0.443414	9.66363	6.345	5.451	4.53	3.674	2.923	2.279	1.766	1.316	0.999098	0.764851	0.595771	0.480707	0.388598	0.304181	0.257876	0.215371	0.177734	0	1.7004	1.05451	5.59795	4.48305	2.69943	1.6415	0.239636	-0.64295	-1.89716	-2.24141	0	0	0	0	0	0	0	12.635	11.1045	10.9646
					0.464248	9.82736	6.529	5.502	4.622	3.722	2.976	2.324	1.765	1.343	1.01	0.784193	0.603482	0.483077	0.377268	0.319024	0.266938	0.21316	0.180664	0	1.74971	1.06438	5.71164	4.54162	2.74837	1.67391	0.2395	-0.656141	-1.91786	-2.29809	0	0	0	0	0	0	0	12.857	11.3266	11.1867
					0.485081	9.9936	6.564	5.631	4.664	3.808	3.005	2.341	1.78	1.336	1.015	0.763419	0.603239	0.502853	0.39152	0.304179	0.256585	0.217407	0.177734	0	1.75909	1.08933	5.76354	4.64656	2.77515	1.68615	0.241535	-0.652722	-1.92735	-2.23722	0	0	0	0	0	0	0	13.1441	11.6136	11.4737
					0.505914	10.1623	6.693	5.723	4.776	3.871	3.076	2.363	1.803	1.383	1.045	0.806035	0.617883	0.482757	0.390931	0.313371	0.259757	0.213505	0.172852	0	1.79366	1.10713	5.90194	4.72343	2.84072	1.702	0.244656	-0.675684	-1.98432	-2.3621	0	0	0	0	0	0	0	13.2914	11.761	11.6211
					0.526748	10.3334	6.861	5.832	4.836	3.931	3.119	2.4	1.824	1.391	1.1	0.792862	0.624628	0.483608	0.388399	0.308676	0.256562	0.232076	0.177734	0	1.83869	1.12822	5.97609	4.79665	2.88043	1.72865	0.247506	-0.679593	-2.08876	-2.3235	0	0	0	0	0	0	0	13.5044	11.9739	11.834
					0.547581	10.5068	6.973	5.934	4.9	3.958	3.149	2.433	1.833	1.395	1.086	0.793474	0.618272	0.480957	0.385498	0.305773	0.261155	0.216208	0.18457	0	1.8687	1.14795	6.05518	4.82959	2.90814	1.75242	0.248727	-0.681547	-2.06217	-2.32529	0	0	0	0	0	0	0	13.7417	12.2112	12.0713
					0.568414	10.6826	7.114	6.019	4.987	4.084	3.18	2.441	1.859	1.392	1.057	0.798323	0.616093	0.476805	0.37646	0.300567	0.253279	0.196307	0.157227	0	1.90649	1.16439	6.16269	4.98334	2.93677	1.75818	0.252255	-0.680081	-2.00711	-2.3395	0	0	0	0	0	0	0	14.1374	12.607	12.4671
					0.589248	10.8606	7.235	6.137	5.08	4.076	3.232	2.478	1.873	1.419	1.057	0.803128	0.625948	0.489511	0.409502	0.30829	0.252216	0.199056	0.166016	0	1.93891	1.18722	6.27761	4.97358	2.98479	1.78483	0.254155	-0.693272	-2.00711	-2.35358	0	0	0	0	0	0	0	14.3471	12.8167	12.6768
					0.610081	11.0408	7.349	6.234	5.126	4.179	3.277	2.514	1.895	1.434	1.072	0.819092	0.626394	0.488523	0.423727	0.3088	0.260093	0.205998	0.164062	0	1.96947	1.20599	6.33445	5.09926	3.02635	1.81076	0.25714	-0.700601	-2.03559	-2.40036	0	0	0	0	0	0	0	14.5669	13.0364	12.8965
					0.630914	11.2231	7.526	6.333	5.22	4.22	3.335	2.672	1.929	1.467	1.086	0.817934	0.62817	0.489969	0.388328	0.303069	0.252351	0.207628	0.160156	0	2.0169	1.22514	6.45061	5.14929	3.07991	1.92456	0.261754	-0.716723	-2.06217	-2.39697	0	0	0	0	0	0	0	14.9323	13.4018	13.2619
					0.651748	11.4074	7.646	6.465	5.331	4.281	3.391	2.595	1.959	1.468	1.094	0.827535	0.637632	0.488294	0.383463	0.315179	0.262648	0.200831	0.161133	0	2.04906	1.25067	6.58778	5.22372	3.13163	1.8691	0.265825	-0.717212	-2.07736	-2.42511	0	0	0	0	0	0	0	15.1581	13.6277	13.4877
					0.672581	11.5938	7.777	6.592	5.422	4.361	3.436	2.615	1.983	1.483	1.095	0.833357	0.635598	0.505195	0.387603	0.300839	0.282436	0.197233	0.173828	0	2.08417	1.27524	6.70024	5.32134	3.17319	1.88351	0.269081	-0.72454	-2.07926	-2.44217	0	0	0	0	0	0	0	15.4608	13.9303	13.7904
					0.693414	11.7822	7.893	6.679	5.526	4.416	3.466	2.656	2.003	1.504	1.119	0.877067	0.638339	0.495619	0.385967	0.303837	0.252696	0.191951	0.154297	0	2.11525	1.29207	6.82875	5.38845	3.20089	1.91304	0.271795	-0.7348	-2.12484	-2.57026	0	0	0	0	0	0	0	15.5804	14.0499	13.91
					0.714248	11.9725	8.107	6.785	5.609	4.474	3.533	2.699	2.023	1.523	1.125	0.847458	0.641228	0.507594	0.402238	0.31519	0.248737	0.20704	0.164062	0	2.1726	1.31258	6.93132	5.45922	3.26277	1.94401	0.274509	-0.744083	-2.13623	-2.48349	0	0	0	0	0	0	0	15.9932	14.4628	14.3228
					0.735081	12.1646	8.144	6.889	5.684	4.542	3.568	2.732	2.054	1.529	1.137	0.853926	0.637632	0.500616	0.387972	0.306621	0.241756	0.198864	0.155273	0	2.18252	1.3327	7.024	5.54219	3.29509	1.96778	0.278715	-0.747014	-2.15902	-2.50245	0	0	0	0	0	0	0	16.2145	14.6841	14.5442
					0.755914	12.3585	8.344	7.028	5.777	4.596	3.634	2.779	2.076	1.561	1.156	0.877562	0.661625	0.5168	0.40389	0.312763	0.255687	0.202197	0.178711	0	2.23612	1.35959	7.13893	5.60809	3.35604	2.00163	0.281701	-0.762648	-2.19509	-2.57171	0	0	0	0	0	0	0	16.4526	14.9222	14.7823
					0.776748	12.5542	8.489	7.126	5.893	4.705	3.674	2.831	2.124	1.583	1.177	0.883379	0.682894	0.52422	0.405126	0.325826	0.265546	0.214337	0.167969	0	2.27498	1.37855	7.28227	5.74109	3.39298	2.03908	0.288214	-0.773397	-2.23497	-2.58876	0	0	0	0	0	0	0	16.8	15.2696	15.1297
					0.797581	12.7516	8.664	7.266	5.976	4.801	3.736	2.86	2.181	1.601	1.181	0.895728	0.681888	0.5375	0.410748	0.324214	0.279893	0.207647	0.181641	0	2.32187	1.40563	7.38484	5.85823	3.45024	2.05997	0.295949	-0.782191	-2.24257	-2.62495	0	0	0	0	0	0	0	17.127	15.5966	15.4567
					0.818414	12.9506	8.811	7.383	6.116	4.846	3.824	2.9	2.2	1.635	1.24	0.911459	0.70537	0.538498	0.412465	0.336145	0.273269	0.212023	0.170898	0	2.36127	1.42826	7.55785	5.91314	3.53151	2.08878	0.298527	-0.798802	-2.3546	-2.67105	0	0	0	0	0	0	0	17.3549	15.8244	15.6845
					0.839248	13.1512	8.898	7.529	6.167	4.944	3.887	2.945	2.207	1.656	1.247	0.919135	0.708035	0.547223	0.414734	0.332214	0.268632	0.216618	0.178711	0	2.38458	1.45651	7.62087	6.03272	3.58969	2.1212	0.299477	-0.809062	-2.36789	-2.69354	0	0	0	0	0	0	0	17.6345	16.1041	15.9642
					0.860093	13.3534	9.098	7.685	6.262	5.023	3.936	2.997	2.248	1.678	1.353	0.93662	0.706009	0.5486	0.422553	0.334473	0.279469	0.218653	0.175781	0	2.43818	1.48669	7.73827	6.12911	3.63494	2.15865	0.30504	-0.81981	-2.56917	-2.74478	0	0	0	0	0	0	0	17.7571	16.2267	16.0868
					0.880926	13.557	9.213	7.779	6.344	5.105	3.99	3.062	2.278	1.711	1.268	0.959486	0.719817	0.554704	0.437673	0.350845	0.275738	0.21501	0.191406	0	2.469	1.50487	7.8396	6.22917	3.68481	2.20547	0.309111	-0.835933	-2.40777	-2.81179	0	0	0	0	0	0	0	18.1865	16.6561	16.5162
					0.901759	13.762	9.418	7.877	6.471	5.206	4.042	3.084	2.297	1.732	1.279	0.955186	0.733025	0.566461	0.425378	0.336728	0.279131	0.208996	0.167969	0	2.52394	1.52383	7.99654	6.35241	3.73284	2.22131	0.311689	-0.846193	-2.42865	-2.79919	0	0	0	0	0	0	0	18.5885	17.0581	16.9182
					0.922593	13.9684	9.502	8.055	6.578	5.274	4.119	3.148	2.335	1.757	1.29	0.989612	0.743565	0.57036	0.470741	0.349419	0.280001	0.221414	0.188477	0	2.54645	1.55826	8.12876	6.43539	3.80395	2.26741	0.316845	-0.858407	-2.44954	-2.90008	0	0	0	0	0	0	0	18.849	17.3186	17.1787
					0.943426	14.1781	9.744	8.133	6.748	5.372	4.191	3.209	2.417	1.808	1.354	1.017	0.773209	0.615261	0.464856	0.37894	0.30134	0.244418	0.199219	0	2.6113	1.57335	8.33884	6.55497	3.87044	2.31135	0.327972	-0.883324	-2.57107	-2.98034	0	0	0	0	0	0	0	19.1535	17.623	17.4831
					0.964259	14.3922	9.822	8.354	6.828	5.507	4.329	3.299	2.502	1.898	1.419	1.081	0.830142	0.642558	0.512409	0.463858	0.34271	0.307229	0.239258	0	2.63221	1.61611	8.4377	6.7197	3.99788	2.37617	0.339506	-0.927294	-2.6945	-3.16789	0	0	0	0	0	0	0	19.3296	17.7991	17.6592
					0.985093	14.6107	9.95	8.487	6.951	5.582	4.389	3.366	2.561	1.92	1.441	1.094	0.845603	0.667087	0.524823	0.426523	0.345278	0.283129	0.251953	0	2.66651	1.64184	8.5897	6.81121	4.05329	2.42443	0.347512	-0.938043	-2.73627	-3.20599	0	0	0	0	0	0	0	19.6542	18.1237	17.9838
					1.00593	14.8335	10.165	8.545	7.02	5.635	4.428	3.382	2.56	1.928	1.441	1.089	0.834731	0.643254	0.521753	0.411443	0.334985	0.272732	0.229492	0	2.72413	1.65306	8.67496	6.87588	4.08931	2.43595	0.347377	-0.941951	-2.73627	-3.19134	0	0	0	0	0	0	0	19.9311	18.4007	18.2608
					1.02676	15.0607	10.218	8.639	7.104	5.695	4.486	3.426	2.593	1.923	1.438	1.087	0.832181	0.648428	0.496882	0.402316	0.315607	0.265645	0.213867	0	2.73833	1.67124	8.77877	6.9491	4.14287	2.46765	0.351855	-0.939509	-2.73058	-3.18548	0	0	0	0	0	0	0	20.2443	18.7138	18.5739
					1.04759	15.2921	10.412	8.776	7.242	5.764	4.555	3.5	2.616	1.968	1.46	1.111	0.843745	0.644805	0.509772	0.40692	0.330523	0.267229	0.214844	0	2.79032	1.69774	8.9493	7.03329	4.2066	2.52094	0.354976	-0.961494	-2.77235	-3.25581	0	0	0	0	0	0	0	20.5635	19.0331	18.8932
					1.06843	15.5277	10.499	8.87	7.299	5.852	4.594	3.524	2.647	1.991	1.48	1.123	0.866327	0.649539	0.504425	0.410042	0.347239	0.260082	0.212891	0	2.81364	1.71593	9.01974	7.14067	4.24261	2.53823	0.359182	-0.972731	-2.81033	-3.29097	0	0	0	0	0	0	0	20.756	19.2255	19.0856
					1.08926	15.7674	10.685	8.947	7.417	5.944	4.687	3.573	2.68	2.011	1.502	1.129	0.855049	0.702064	0.507614	0.411565	0.328265	0.258994	0.208008	0	2.86348	1.73082	9.16556	7.25293	4.3285	2.57352	0.36366	-0.982502	-2.8521	-3.30856	0	0	0	0	0	0	0	21.1353	19.6049	19.465
					1.11009	16.0112	10.756	9.134	7.533	6.036	4.748	3.61	2.743	2.042	1.504	1.133	0.86983	0.663044	0.522429	0.410572	0.373924	0.27028	0.208984	0	2.88251	1.767	9.3089	7.36519	4.38483	2.60017	0.372209	-0.997648	-2.8559	-3.32028	0	0	0	0	0	0	0	21.507	19.9765	19.8366
					1.13093	16.2591	10.912	9.205	7.601	6.097	4.802	3.649	2.747	2.042	1.505	1.121	0.84993	0.65704	0.49663	0.3893	0.312913	0.239886	0.209961	0	2.92432	1.78073	9.39294	7.43962	4.4347	2.62827	0.372751	-0.997648	-2.8578	-3.28511	0	0	0	0	0	0	0	21.8328	20.3023	20.1624
					1.15176	16.5109	11.043	9.315	7.688	6.185	4.791	3.683	2.759	2.029	1.492	1.094	0.830753	0.647651	0.465004	0.359723	0.306275	0.211166	0.166992	0	2.95942	1.80201	9.50045	7.547	4.42455	2.65275	0.37438	-0.991296	-2.83311	-3.20599	0	0	0	0	0	0	0	22.2302	20.6997	20.5598
					1.17259	16.7666	11.151	9.483	7.781	6.228	4.877	3.718	2.884	2.056	1.508	1.126	0.846893	0.632036	0.474378	0.373762	0.300721	0.260351	0.163086	0	2.98837	1.83451	9.61537	7.59947	4.50397	2.67796	0.391341	-1.00449	-2.8635	-3.29977	0	0	0	0	0	0	0	22.4432	20.9128	20.7729
					1.19343	17.0263	11.355	9.617	7.889	6.313	4.981	3.792	2.825	2.093	1.532	1.143	0.848945	0.657028	0.482457	0.373379	0.298578	0.22959	0.164062	0	3.04304	1.86044	9.74883	7.70319	4.60001	2.73126	0.383336	-1.02256	-2.90907	-3.34958	0	0	0	0	0	0	0	22.7889	21.2584	21.1185
					1.21426	17.2898	11.553	9.702	8.011	6.435	5.002	3.854	2.86	2.159	1.584	1.158	0.869768	0.656358	0.492591	0.384702	0.296588	0.225694	0.183594	0	3.0961	1.87688	9.89959	7.85205	4.61941	2.77592	0.388085	-1.05481	-3.00781	-3.39354	0	0	0	0	0	0	0	23.0519	21.5214	21.3815
					1.23509	17.557	11.64	9.906	8.153	6.559	5.11	3.912	2.931	2.191	1.61	1.198	0.904989	0.689115	0.52125	0.39516	0.315566	0.248024	0.178711	0	3.11942	1.91635	10.0751	8.00336	4.71915	2.8177	0.397719	-1.07044	-3.05718	-3.51076	0	0	0	0	0	0	0	23.4104	21.8799	21.74
					1.25593	17.828	11.862	10.069	8.311	6.594	5.189	3.956	2.976	2.206	1.64	1.203	0.909533	0.68142	0.527876	0.407537	0.311334	0.247218	0.179688	0	3.17891	1.94788	10.2703	8.04606	4.7921	2.84939	0.403825	-1.07777	-3.11415	-3.52542	0	0	0	0	0	0	0	23.7712	22.2407	22.1008
					1.27676	18.1026	11.955	10.17	8.356	6.695	5.256	4.022	3.054	2.244	1.656	1.224	0.930197	0.700077	0.526552	0.402221	0.317187	0.239911	0.178711	0	3.20383	1.96742	10.3259	8.16931	4.85398	2.89693	0.414409	-1.09634	-3.14453	-3.58696	0	0	0	0	0	0	0	24.004	22.4735	22.3336
					1.29759	18.3808	12.134	10.253	8.447	6.797	5.305	4.036	3.043	2.259	1.651	1.229	0.916831	0.684946	0.523458	0.399796	0.325138	0.235514	0.172852	0	3.2518	1.98347	10.4384	8.29377	4.89923	2.90701	0.412917	-1.10367	-3.13503	-3.60161	0	0	0	0	0	0	0	24.3463	22.8158	22.6759
					1.31843	18.6626	12.276	10.395	8.611	6.864	5.346	4.122	3.053	2.267	1.665	1.233	0.913112	0.691785	0.523661	0.438098	0.312481	0.260171	0.170898	0	3.28986	2.01094	10.641	8.37552	4.9371	2.96895	0.414274	-1.10757	-3.16162	-3.61333	0	0	0	0	0	0	0	24.7552	23.2247	23.0848
					1.33926	18.948	12.445	10.547	8.658	6.958	5.458	4.127	3.106	2.295	1.696	1.245	0.931119	0.699311	0.540023	0.400418	0.331213	0.241095	0.174805	0	3.33515	2.04035	10.6991	8.49022	5.04053	2.97255	0.421466	-1.12125	-3.22048	-3.6485	0	0	0	0	0	0	0	25.0092	23.4787	23.3388
					1.36009	19.2367	12.595	10.648	8.796	7.049	5.527	4.197	3.145	2.33	1.726	1.272	0.960631	0.708217	0.561164	0.415652	0.32263	0.251672	0.18457	0	3.37535	2.05989	10.8697	8.60126	5.10425	3.02297	0.426758	-1.13835	-3.27745	-3.72762	0	0	0	0	0	0	0	25.3167	23.7863	23.6464
					1.38093	19.5289	12.802	10.785	8.876	7.167	5.604	4.265	3.21	2.38	1.748	1.295	0.960443	0.732979	0.561107	0.421681	0.327292	0.25257	0.182617	0	3.43082	2.08639	10.9685	8.74525	5.17536	3.07195	0.435578	-1.16278	-3.31922	-3.79502	0	0	0	0	0	0	0	25.6368	24.1064	23.9665
					1.40176	19.8245	12.877	10.959	9.003	7.264	5.67	4.333	3.225	2.403	1.761	1.298	0.969724	0.731978	0.540284	0.431305	0.322075	0.247502	0.183594	0	3.45092	2.12005	11.1255	8.86361	5.23631	3.12093	0.437613	-1.17402	-3.34391	-3.80381	0	0	0	0	0	0	0	26.0331	24.5027	24.3628
					1.42259	20.1233	13.121	11.121	9.184	7.369	5.769	4.394	3.308	2.445	1.799	1.347	0.993783	0.759864	0.567939	0.432046	0.339576	0.258473	0.202148	0	3.51631	2.15139	11.3491	8.99173	5.32774	3.16487	0.448876	-1.19454	-3.41607	-3.94741	0	0	0	0	0	0	0	26.392	24.8616	24.7217
					1.44343	20.4254	13.361	11.281	9.335	7.517	5.885	4.511	3.397	2.546	1.877	1.409	1.057	0.801451	0.621697	0.482587	0.395455	0.316067	0.28125	0	3.58063	2.18234	11.5357	9.17232	5.43487	3.24914	0.460953	-1.24388	-3.56418	-4.1291	0	0	0	0	0	0	0	26.6788	25.1484	25.0085
					1.46426	20.7307	13.5	11.381	9.444	7.61	5.96	4.549	3.426	2.559	1.909	1.413	1.068	0.81062	0.640008	0.483272	0.383739	0.291409	0.240234	0	3.61788	2.20169	11.6704	9.2858	5.50413	3.27651	0.464888	-1.25024	-3.62494	-4.14082	0	0	0	0	0	0	0	27.0053	25.4749	25.335
					1.48509	21.0392	13.645	11.571	9.595	7.691	6.035	4.645	3.456	2.581	1.909	1.435	1.065	0.798344	0.621484	0.485274	0.380893	0.295325	0.25	0	3.65674	2.23844	11.857	9.38464	5.57339	3.34565	0.468958	-1.26098	-3.62494	-4.2053	0	0	0	0	0	0	0	27.4336	25.9032	25.7633
					1.50593	21.3507	13.857	11.704	9.741	7.796	6.147	4.665	3.521	2.614	1.928	1.429	1.077	0.809192	0.64792	0.495947	0.375761	0.309499	0.225586	0	3.71355	2.26417	12.0374	9.51276	5.67683	3.36006	0.477779	-1.27711	-3.66102	-4.18771	0	0	0	0	0	0	0	27.9167	26.3863	26.2464
					1.52676	21.6653	14.044	11.898	9.821	7.915	6.206	4.741	3.551	2.646	1.961	1.474	1.115	0.837071	0.640089	0.507576	0.388798	0.298207	0.241211	0	3.76367	2.3017	12.1363	9.65796	5.73132	3.4148	0.481849	-1.29274	-3.72368	-4.31959	0	0	0	0	0	0	0	28.1516	26.6211	26.4812
					1.5476	21.983	14.293	12.131	10.051	8.003	6.327	4.817	3.625	2.709	2	1.471	1.113	0.857963	0.639177	0.495491	0.393589	0.301506	0.240234	0	3.8304	2.34678	12.4205	9.76534	5.84306	3.46954	0.491891	-1.32352	-3.79774	-4.31079	0	0	0	0	0	0	0	28.7355	27.205	27.0651
					1.56844	22.3035	14.498	12.208	10.167	8.187	6.381	4.93	3.672	2.737	2.03	1.498	1.142	0.859614	0.644732	0.503977	0.395765	0.323894	0.246094	0	3.88533	2.36167	12.5639	9.98986	5.89293	3.55093	0.498268	-1.3372	-3.85471	-4.38992	0	0	0	0	0	0	0	29.161	27.6306	27.4907
					1.58927	22.6269	14.664	12.392	10.255	8.279	6.498	4.947	3.728	2.771	2.049	1.546	1.136	0.861334	0.656877	0.513945	0.400839	0.30799	0.241211	0	3.92982	2.39727	12.6726	10.1021	6.00098	3.56318	0.505867	-1.35381	-3.89078	-4.53058	0	0	0	0	0	0	0	29.3967	27.8662	27.7263
					1.6101	22.9532	14.844	12.594	10.435	8.341	6.589	5.01	3.781	2.826	2.078	1.535	1.157	0.891177	0.663522	0.517509	0.414482	0.320854	0.245117	0	3.97806	2.43635	12.8951	10.1778	6.08502	3.60855	0.513059	-1.38068	-3.94585	-4.49835	0	0	0	0	0	0	0	29.869	28.3385	28.1986
					1.63094	23.2822	15.118	12.781	10.585	8.552	6.678	5.103	3.855	2.846	2.103	1.561	1.189	0.885779	0.665842	0.523011	0.426165	0.314885	0.245117	0	4.05149	2.47252	13.0804	10.4352	6.16721	3.67554	0.5231	-1.39045	-3.99332	-4.57454	0	0	0	0	0	0	0	30.4472	28.9167	28.7768
					1.65177	23.6139	15.274	12.983	10.701	8.635	6.81	5.185	3.902	2.897	2.163	1.614	1.203	0.896774	0.680933	0.539169	0.416384	0.331349	0.251953	0	4.09329	2.5116	13.2238	10.5365	6.28912	3.7346	0.529478	-1.41537	-4.10726	-4.72986	0	0	0	0	0	0	0	30.6659	29.1354	28.9955
					1.6726	23.9483	15.462	13.151	10.884	8.777	6.901	5.259	3.963	2.947	2.186	1.61	1.222	0.922521	0.705912	0.53647	0.432035	0.33468	0.263672	0	4.14368	2.5441	13.4499	10.7098	6.37316	3.7879	0.537755	-1.4398	-4.15093	-4.71814	0	0	0	0	0	0	0	31.2374	29.707	29.5671
					1.69344	24.2853	15.694	13.362	11.036	8.937	6.963	5.33	4.021	2.993	2.195	1.624	1.231	0.923122	0.699922	0.540898	0.424882	0.347201	0.251953	0	4.20585	2.58492	13.6377	10.905	6.43041	3.83904	0.545626	-1.46227	-4.16802	-4.75916	0	0	0	0	0	0	0	31.7591	30.2287	30.0888
					1.71427	24.6249	15.888	13.516	11.206	9.023	7.076	5.416	4.083	3.029	2.227	1.661	1.24	0.934708	0.711936	0.552506	0.438667	0.33757	0.257812	0	4.25784	2.61471	13.8478	11.01	6.53477	3.90098	0.554039	-1.47986	-4.22878	-4.86759	0	0	0	0	0	0	0	32.1439	30.6134	30.4735
					1.7351	24.9671	16.017	13.697	11.321	9.144	7.173	5.483	4.12	3.06	2.247	1.669	1.248	0.942022	0.712843	0.559334	0.434119	0.337838	0.259766	0	4.29241	2.64973	13.9899	11.1576	6.62435	3.94924	0.559059	-1.49501	-4.26676	-4.89104	0	0	0	0	0	0	0	32.5695	31.0391	30.8992
					1.71427	24.6249	16.367	13.825	11.519	9.296	7.291	5.586	4.181	3.098	2.29	1.699	1.259	0.954978	0.749904	0.558259	0.436593	0.335313	0.265625	0	4.38621	2.67449	14.2346	11.3431	6.73333	4.02343	0.567337	-1.51357	-4.34841	-4.97895	0	0	0	0	0	0	0	33.1215	31.5911	31.4512
					1.7351	24.9671	16.604	14.091	11.637	9.411	7.399	5.641	4.24	3.147	2.327	1.73	1.291	0.971441	0.743991	0.571633	0.439782	0.346566	0.265625	0	4.44972	2.72595	14.3804	11.4834	6.83307	4.06304	0.575343	-1.53751	-4.41867	-5.0698	0	0	0	0	0	0	0	33.485	31.9545	31.8146
					1.75594	25.3116	16.697	14.22	11.81	9.469	7.438	5.726	4.309	3.179	2.345	1.736	1.289	1.029	0.731478	0.56743	0.443731	0.345945	0.257812	0	4.47465	2.7509	14.5942	11.5542	6.86908	4.12427	0.584705	-1.55314	-4.45285	-5.08738	0	0	0	0	0	0	0	33.8586	32.3281	32.1882
					1.77677	25.6587	16.997	14.403	11.96	9.646	7.582	5.799	4.346	3.289	2.388	1.763	1.32	0.989722	0.768843	0.5802	0.451927	0.353889	0.271484	0	4.55504	2.7863	14.7796	11.7701	7.00207	4.17685	0.589726	-1.60689	-4.5345	-5.16651	0	0	0	0	0	0	0	34.3518	32.8214	32.6815
					1.7976	26.008	17.159	14.607	12.071	9.782	7.692	5.883	4.436	3.266	2.43	1.795	1.344	1.007	0.799419	0.601981	0.453479	0.345744	0.265625	0	4.59846	2.82577	14.9167	11.9361	7.10365	4.23735	0.601939	-1.59565	-4.61425	-5.26028	0	0	0	0	0	0	0	34.7498	33.2194	33.0795
					1.81844	26.3597	17.392	14.87	12.289	9.924	7.803	5.996	4.493	3.356	2.467	1.817	1.36	1.027	0.775146	0.618874	0.475239	0.357603	0.271484	0	4.6609	2.87665	15.1861	12.1094	7.20616	4.31874	0.609673	-1.63962	-4.68451	-5.32475	0	0	0	0	0	0	0	35.3187	33.7883	33.6484
					1.83927	26.7136	17.666	15.039	12.472	10.115	7.908	6.117	4.565	3.428	2.541	1.881	1.402	1.058	0.810434	0.636062	0.489959	0.384189	0.298828	0	4.73433	2.90934	15.4123	12.3424	7.30313	4.40589	0.619443	-1.6748	-4.82503	-5.51231	0	0	0	0	0	0	0	35.7147	34.1843	34.0443
					1.8601	27.0698	17.936	15.201	12.645	10.235	8.04	6.156	4.659	3.471	2.57	1.911	1.424	1.092	0.824794	0.634271	0.506201	0.389133	0.304688	0	4.80669	2.94068	15.6261	12.4888	7.42504	4.43398	0.632198	-1.69581	-4.8801	-5.60022	0	0	0	0	0	0	0	36.1774	34.6469	34.507
					1.88094	27.4281	18.026	15.417	12.777	10.314	8.159	6.246	4.713	3.506	2.605	1.925	1.439	1.083	0.82333	0.674601	0.504428	0.399395	0.304688	0	4.83081	2.98246	15.7892	12.5852	7.53493	4.49881	0.639526	-1.71291	-4.94656	-5.64125	0	0	0	0	0	0	0	36.5602	35.0298	34.8899
					1.90177	27.7885	18.347	15.541	12.937	10.41	8.244	6.299	4.752	3.554	2.63	1.935	1.457	1.08	0.832823	0.633469	0.506973	0.407094	0.298828	0	4.91683	3.00645	15.9869	12.7024	7.61343	4.53698	0.644818	-1.73636	-4.99403	-5.67056	0	0	0	0	0	0	0	37.0069	35.4764	35.3365
					1.9226	28.1509	18.499	15.708	13.121	10.506	8.321	6.39	4.822	3.586	2.677	1.967	1.477	1.116	0.838746	0.649377	0.510785	0.394824	0.304688	0	4.95757	3.03876	16.2143	12.8195	7.68454	4.60253	0.654316	-1.75199	-5.08327	-5.76433	0	0	0	0	0	0	0	37.3719	35.8415	35.7016
					1.94344	28.5153	18.686	15.971	13.292	10.709	8.489	6.47	4.934	3.692	2.723	2.005	1.496	1.134	0.865584	0.676373	0.534351	0.401336	0.318359	0	5.00768	3.08964	16.4256	13.0672	7.83969	4.66015	0.669514	-1.80378	-5.17062	-5.87569	0	0	0	0	0	0	0	37.9094	36.3789	36.239
					1.96427	28.8825	18.882	16.212	13.405	10.825	8.603	6.57	4.948	3.691	2.739	2.043	1.526	1.135	0.85853	0.663214	0.519114	0.399208	0.320312	0	5.06021	3.13626	16.5652	13.2088	7.94497	4.73217	0.671414	-1.80329	-5.201	-5.98705	0	0	0	0	0	0	0	38.3277	36.7972	36.6573
					1.9851	29.2583	19.147	16.407	13.674	11.034	8.713	6.737	5.063	3.807	2.819	2.106	1.586	1.189	0.942116	0.715196	0.580994	0.453441	0.353516	0	5.13122	3.17398	16.8976	13.4638	8.04656	4.85246	0.687019	-1.85996	-5.35291	-6.17168	0	0	0	0	0	0	0	38.8681	37.3377	37.1978
					2.00594	29.6435	19.469	16.615	13.751	11.223	8.813	6.829	5.158	3.865	2.881	2.172	1.631	1.238	0.96151	0.743308	0.586812	0.469837	0.382812	0	5.21752	3.21422	16.9928	13.6944	8.13891	4.91872	0.69991	-1.8883	-5.47064	-6.36509	0	0	0	0	0	0	0	39.1525	37.622	37.4821
					2.02677	30.0378	19.517	16.832	13.956	11.321	8.953	6.934	5.228	3.937	2.957	2.194	1.654	1.245	0.985633	0.760135	0.594507	0.479216	0.382812	0	5.23038	3.2562	17.2461	13.814	8.2682	4.99435	0.709408	-1.92348	-5.61496	-6.42956	0	0	0	0	0	0	0	39.5507	38.0202	37.8803
					2.0476	30.4409	19.801	16.923	14.116	11.411	9.023	6.971	5.311	3.968	2.94	2.224	1.668	1.25	0.972947	0.759996	0.594232	0.485295	0.373047	0	5.30649	3.27381	17.4438	13.9238	8.33285	5.021	0.720671	-1.93862	-5.58268	-6.51748	0	0	0	0	0	0	0	39.9837	38.4533	38.3133
					2.06844	30.8524	19.993	17.015	14.31	11.527	9.139	7.07	5.362	4.029	2.969	2.251	1.697	1.312	0.981715	0.766002	0.61353	0.485578	0.382812	0	5.35794	3.2916	17.6836	14.0654	8.43998	5.09231	0.727591	-1.96842	-5.63775	-6.5966	0	0	0	0	0	0	0	40.4556	38.9251	38.7852
					2.08927	31.2719	20.186	17.325	14.427	11.676	9.234	7.126	5.415	4.04	3.011	2.24	1.692	1.275	0.981761	0.766758	0.601228	0.478334	0.367188	0	5.40967	3.35157	17.8282	14.2472	8.52771	5.13264	0.734783	-1.9738	-5.7175	-6.56436	0	0	0	0	0	0	0	40.9761	39.4456	39.3057
					2.1101	31.6992	20.392	17.541	14.592	11.857	9.326	7.247	5.446	4.103	3.031	2.257	1.703	1.291	0.982546	0.776086	0.608159	0.473149	0.380859	0	5.46487	3.39336	18.0321	14.468	8.61267	5.2198	0.73899	-2.00458	-5.75547	-6.61418	0	0	0	0	0	0	0	41.5555	40.0251	39.8852
					2.13094	32.1339	20.674	17.637	14.77	11.959	9.487	7.284	5.554	4.133	3.081	2.319	1.727	1.308	1.027	0.781547	0.622457	0.47908	0.386719	0	5.54045	3.41193	18.252	14.5925	8.76136	5.24645	0.753644	-2.01924	-5.85042	-6.79588	0	0	0	0	0	0	0	41.8928	40.3624	40.2225
					2.15177	32.5756	20.883	17.917	14.896	12.065	9.622	7.36	5.599	4.188	3.12	2.323	1.743	1.318	1.002	0.790079	0.610592	0.479344	0.373047	0	5.59646	3.4661	18.4077	14.7218	8.88603	5.30119	0.759751	-2.04611	-5.92447	-6.8076	0	0	0	0	0	0	0	42.3609	40.8305	40.6906
					2.17262	33.0242	21.237	18.026	15.118	12.251	9.739	7.466	5.639	4.239	3.148	2.357	1.764	1.342	1.008	0.77908	0.610143	0.492154	0.367188	0	5.69132	3.48718	18.6821	14.9488	8.99408	5.37754	0.765178	-2.07102	-5.97764	-6.90724	0	0	0	0	0	0	0	42.9903	41.4598	41.3199
					2.19345	33.479	21.294	18.352	15.214	12.314	9.783	7.529	5.675	4.226	3.153	2.328	1.746	1.299	0.979584	0.74358	0.615389	0.443406	0.330078	0	5.7066	3.55025	18.8007	15.0257	9.03472	5.42291	0.770063	-2.06467	-5.98714	-6.82225	0	0	0	0	0	0	0	43.4369	41.9064	41.7665
					2.21428	33.9397	21.638	18.581	15.43	12.447	9.887	7.617	5.73	4.297	3.176	2.363	1.754	1.326	0.998091	0.774468	0.584511	0.455157	0.330078	0	5.79879	3.59455	19.0676	15.188	9.13076	5.4863	0.777527	-2.09936	-6.03081	-6.92482	0	0	0	0	0	0	0	43.9885	42.4581	42.3182
					2.23512	34.4061	21.833	18.642	15.621	12.62	9.966	7.699	5.816	4.359	3.224	2.401	1.786	1.337	1.012	0.778977	0.610252	0.457683	0.333984	0	5.85105	3.60635	19.3037	15.3991	9.20372	5.54536	0.789196	-2.12965	-6.12196	-7.03618	0	0	0	0	0	0	0	44.4106	42.8801	42.7402
					2.25595	34.8779	22.068	18.96	15.763	12.828	10.174	7.814	5.963	4.445	3.322	2.454	1.86	1.402	1.07	0.818076	0.643247	0.497197	0.376953	0	5.91403	3.66787	19.4791	15.6529	9.39581	5.62819	0.809143	-2.17167	-6.30805	-7.1915	0	0	0	0	0	0	0	44.8758	43.3454	43.2055
					2.27678	35.3546	22.29	19.176	15.97	12.953	10.294	7.932	6.031	4.519	3.346	2.502	1.878	1.43	1.071	0.850512	0.651173	0.515334	0.386719	0	5.97352	3.70965	19.7349	15.8054	9.50663	5.71318	0.818371	-2.20782	-6.35362	-7.33216	0	0	0	0	0	0	0	45.3681	43.8376	43.6977
					2.29762	35.8359	22.566	19.36	16.011	13.091	10.328	7.979	6.056	4.511	3.367	2.493	1.861	1.415	1.077	0.809746	0.63547	0.485513	0.357422	0	6.04748	3.74525	19.7856	15.9738	9.53803	5.74703	0.821763	-2.20391	-6.3935	-7.30579	0	0	0	0	0	0	0	45.7557	44.2253	44.0854
					2.31845	36.3215	22.766	19.53	16.303	13.201	10.488	8.038	6.095	4.608	3.377	2.534	1.885	1.431	1.081	0.820801	0.649025	0.484958	0.367188	0	6.10108	3.77814	20.1464	16.108	9.68579	5.78953	0.827055	-2.2513	-6.41248	-7.42594	0	0	0	0	0	0	0	46.3463	44.8158	44.6759
					2.33928	36.8111	23.114	19.711	16.463	13.322	10.599	8.166	6.157	4.647	3.467	2.536	1.928	1.44	1.086	0.851498	0.640642	0.517803	0.361328	0	6.19434	3.81315	20.3442	16.2556	9.7883	5.88172	0.835468	-2.27036	-6.58338	-7.4318	0	0	0	0	0	0	0	46.8272	45.2968	45.1569
					2.36012	37.3042	23.34	19.94	16.72	13.533	10.721	8.264	6.307	4.688	3.523	2.612	1.987	1.488	1.136	0.873655	0.682668	0.536957	0.410156	0	6.25491	3.85745	20.6617	16.5131	9.90097	5.95231	0.855822	-2.29039	-6.68972	-7.65452	0	0	0	0	0	0	0	47.3617	45.8312	45.6913
					2.38095	37.8006	23.57	20.244	16.806	13.749	10.854	8.396	6.402	4.799	3.569	2.681	2.012	1.528	1.176	0.90199	0.69934	0.544076	0.435547	0	6.31655	3.91626	20.768	16.7767	10.0238	6.04739	0.868713	-2.34462	-6.77707	-7.85672	0	0	0	0	0	0	0	47.739	46.2085	46.0686
					2.40178	38.2999	23.828	20.426	17.116	13.857	10.991	8.467	6.447	4.856	3.657	2.709	2.037	1.553	1.191	0.914554	0.717888	0.592563	0.427734	0	6.38569	3.95147	21.1511	16.9084	10.1503	6.09853	0.874819	-2.37247	-6.94417	-7.93878	0	0	0	0	0	0	0	48.265	46.7345	46.5946
					2.42262	38.8018	24.105	20.597	17.133	14.039	11.086	8.625	6.504	4.927	3.669	2.724	2.056	1.583	1.191	0.922414	0.724012	0.55933	0.480469	0	6.45992	3.98455	21.1721	17.1305	10.2381	6.21233	0.882554	-2.40715	-6.96695	-7.98274	0	0	0	0	0	0	0	48.7232	47.1927	47.0528
					2.44345	39.3059	24.339	20.777	17.445	14.168	11.204	8.739	6.613	4.995	3.705	2.829	2.123	1.592	1.219	0.957598	0.764674	0.593131	0.457031	0	6.52263	4.01937	21.5577	17.2879	10.347	6.29444	0.897344	-2.44038	-7.03531	-8.29044	0	0	0	0	0	0	0	49.1603	47.6298	47.4899
					2.46428	39.8119	24.513	21.056	17.565	14.277	11.356	8.805	6.687	5.016	3.762	2.813	2.127	1.605	1.235	0.962736	0.753218	0.583789	0.464844	0	6.56926	4.07335	21.7059	17.4209	10.4874	6.34198	0.907386	-2.45064	-7.14355	-8.24355	0	0	0	0	0	0	0	49.6685	48.1381	47.9982
					2.48512	40.3194	24.763	21.268	17.792	14.477	11.452	8.907	6.751	5.113	3.804	2.833	2.154	1.622	1.25	0.967734	0.765104	0.583745	0.462891	0	6.63626	4.11436	21.9865	17.665	10.5761	6.41544	0.91607	-2.49803	-7.2233	-8.30216	0	0	0	0	0	0	0	50.2861	48.7557	48.6158
					2.50595	40.8282	25.084	21.433	17.94	14.57	11.583	8.996	6.786	5.146	3.819	2.864	2.168	1.626	1.249	0.978165	0.75997	0.599789	0.457031	0	6.72229	4.14628	22.1694	17.7785	10.697	6.47955	0.920819	-2.51415	-7.25178	-8.39301	0	0	0	0	0	0	0	50.7548	49.2244	49.0845
					2.52678	41.3377	25.284	21.741	18.088	14.841	11.704	9.072	6.906	5.22	3.895	2.914	2.202	1.66	1.281	0.985854	0.789437	0.62081	0.482422	0	6.77588	4.20586	22.3522	18.1091	10.8088	6.53429	0.937103	-2.5503	-7.3961	-8.53954	0	0	0	0	0	0	0	51.2374	49.7069	49.567
					2.54762	41.8478	25.536	21.927	18.345	14.906	11.865	9.181	6.991	5.269	3.936	2.942	2.227	1.7	1.299	1.018	0.79666	0.617598	0.519531	0	6.84342	4.24184	22.6698	18.1885	10.9575	6.6128	0.948637	-2.57424	-7.47395	-8.62159	0	0	0	0	0	0	0	51.7927	50.2622	50.1223
					2.56845	42.358	25.873	22.02	18.54	15.114	11.984	9.302	7.082	5.327	3.986	2.985	2.256	1.725	1.306	1.028	0.805411	0.640477	0.488281	0	6.93373	4.25984	22.9108	18.4423	11.0674	6.69995	0.960985	-2.60258	-7.5689	-8.7476	0	0	0	0	0	0	0	52.3559	50.8254	50.6855
					2.58928	42.868	26.038	22.29	18.709	15.23	12.082	9.43	7.143	5.399	4.01	3.045	2.268	1.745	1.36	1.043	0.825164	0.657238	0.511719	0	6.97795	4.31207	23.1196	18.5838	11.1579	6.79215	0.969262	-2.63776	-7.61447	-8.92343	0	0	0	0	0	0	0	52.7371	51.2066	51.0667
					2.61012	43.3775	26.308	22.505	18.899	15.38	12.29	9.466	7.235	5.442	4.072	3.05	2.308	1.754	1.337	1.044	0.827034	0.650625	0.503906	0	7.05031	4.35366	23.3544	18.7668	11.35	6.81808	0.981746	-2.65877	-7.7322	-8.93809	0	0	0	0	0	0	0	53.346	51.8155	51.6756
					2.63095	43.8862	26.544	22.821	19.087	15.535	12.337	9.589	7.293	5.513	4.106	3.098	2.34	1.783	1.383	1.056	0.834539	0.648335	0.503906	0	7.11355	4.41479	23.5868	18.956	11.3934	6.90667	0.989616	-2.69345	-7.79676	-9.07875	0	0	0	0	0	0	0	53.7918	52.2613	52.1214
					2.65178	44.3936	26.76	23.023	19.361	15.659	12.484	9.682	7.344	5.58	4.171	3.135	2.356	1.794	1.37	1.076	0.848378	0.67559	0.507812	0	7.17144	4.45387	23.9254	19.1073	11.5291	6.97365	0.996537	-2.72619	-7.92019	-9.18718	0	0	0	0	0	0	0	54.3237	52.7932	52.6533
					2.67262	44.8995	27	23.341	19.472	15.816	12.741	9.812	7.445	5.635	4.226	3.168	2.41	1.813	1.445	1.101	0.872672	0.672757	0.523438	0	7.23576	4.51539	24.0625	19.2988	11.7665	7.06729	1.01024	-2.75306	-8.02462	-9.28389	0	0	0	0	0	0	0	54.8949	53.3645	53.2246
					2.69345	45.4034	27.347	23.392	19.652	16.122	12.716	9.896	7.543	5.708	4.252	3.206	2.42	1.834	1.4	1.105	0.860789	0.673685	0.523438	0	7.32875	4.52525	24.285	19.6722	11.7434	7.12779	1.02354	-2.78872	-8.074	-9.39525	0	0	0	0	0	0	0	55.4479	53.9175	53.7776
					2.71428	45.9051	27.736	23.634	19.965	16.167	12.877	10.014	7.655	5.719	4.325	3.233	2.43	1.86	1.426	1.118	0.868335	0.682165	0.523438	0	7.433	4.57207	24.6717	19.7271	11.8921	7.21278	1.03874	-2.7941	-8.21261	-9.47437	0	0	0	0	0	0	0	56.0665	54.536	54.3961
					2.73512	46.4042	27.981	23.974	20.11	16.269	13.037	10.095	7.695	5.832	4.364	3.261	2.484	1.874	1.443	1.121	0.889697	0.700663	0.535156	0	7.49866	4.63784	24.8509	19.8516	12.0398	7.27113	1.04417	-2.84931	-8.28667	-9.55643	0	0	0	0	0	0	0	56.5017	54.9713	54.8314
					2.75595	46.9004	28.202	24.165	20.293	16.595	13.162	10.231	7.792	5.902	4.395	3.306	2.487	1.946	1.476	1.13	0.892668	0.700046	0.5625	0	7.55788	4.67479	25.0771	20.2494	12.1553	7.36908	1.05733	-2.8835	-8.34553	-9.6883	0	0	0	0	0	0	0	57.2235	55.693	55.5531
					2.77678	47.3933	28.624	24.415	20.609	16.665	13.352	10.358	7.895	5.964	4.461	3.347	2.537	1.943	1.488	1.152	0.904542	0.703286	0.5625	0	7.67097	4.72315	25.4676	20.3348	12.3307	7.46056	1.0713	-2.9138	-8.47086	-9.80845	0	0	0	0	0	0	0	57.866	56.3355	56.1956
					2.79762	47.8826	28.706	24.698	20.644	16.999	13.437	10.407	7.943	6.029	4.491	3.366	2.56	1.931	1.517	1.167	0.90478	0.705735	0.546875	0	7.69295	4.7779	25.5108	20.7423	12.4092	7.49585	1.07782	-2.94555	-8.52783	-9.86413	0	0	0	0	0	0	0	58.3694	56.839	56.6991
					2.81845	48.3679	29.081	24.917	20.941	17.003	13.61	10.503	8.096	6.086	4.562	3.408	2.606	1.982	1.545	1.181	0.932814	0.733461	0.609375	0	7.79345	4.82027	25.8778	20.7472	12.569	7.565	1.09858	-2.9734	-8.66264	-9.98721	0	0	0	0	0	0	0	58.8481	57.3177	57.1777
					2.83928	48.8489	29.354	25.126	21.241	17.137	13.735	10.637	8.17	6.15	4.608	3.469	2.616	1.993	1.56	1.199	0.955695	0.732869	0.570312	0	7.86661	4.8607	26.2486	20.9107	12.6844	7.66151	1.10862	-3.00467	-8.74999	-10.166	0	0	0	0	0	0	0	59.4205	57.8901	57.7502
					2.86013	49.3255	29.596	25.466	21.287	17.466	13.848	10.765	8.311	6.227	4.663	3.509	2.657	2.044	1.558	1.225	0.959501	0.752078	0.617188	0	7.93146	4.92647	26.3054	21.3122	12.7888	7.75371	1.12775	-3.04229	-8.85443	-10.2832	0	0	0	0	0	0	0	59.9659	58.4354	58.2955
					2.88096	49.7968	29.96	25.666	21.589	17.525	14.003	10.932	8.307	6.264	4.718	3.537	2.672	2.055	1.582	1.234	1.047	0.771228	0.59375	0	8.02901	4.96516	26.6786	21.3842	12.9319	7.87399	1.12721	-3.06036	-8.95887	-10.3652	0	0	0	0	0	0	0	60.6056	59.0752	58.9353
					2.90179	50.2628	30.196	25.894	21.754	17.77	14.17	10.96	8.411	6.333	4.736	3.584	2.703	2.061	1.6	1.234	0.976321	0.760461	0.628906	0	8.09226	5.00927	26.8825	21.6831	13.0862	7.89416	1.14132	-3.09408	-8.99305	-10.503	0	0	0	0	0	0	0	61.1987	59.6683	59.5283
					2.92263	50.7232	30.443	26.218	21.94	17.944	14.273	11.09	8.473	6.388	4.796	3.603	2.73	2.069	1.611	1.246	0.998209	0.769471	0.597656	0	8.15845	5.07195	27.1124	21.8954	13.1813	7.98779	1.14974	-3.12095	-9.10698	-10.5587	0	0	0	0	0	0	0	61.7704	60.24	60.1001
					2.94346	51.179	30.686	26.409	22.218	18.035	14.475	11.211	8.607	6.492	4.851	3.669	2.775	2.139	1.66	1.295	1.023	0.784196	0.625	0	8.22357	5.1089	27.4559	22.0065	13.3678	8.07495	1.16792	-3.17176	-9.21142	-10.7521	0	0	0	0	0	0	0	62.2703	60.7399	60.5999
					2.96429	51.631	31.019	26.816	22.47	18.362	14.581	11.378	8.786	6.598	4.988	3.745	2.857	2.183	1.711	1.335	1.057	0.839546	0.664062	0	8.31281	5.18764	27.7673	22.4055	13.4657	8.19523	1.19221	-3.22355	-9.47156	-10.9748	0	0	0	0	0	0	0	62.8565	61.3261	61.1862
					2.98513	52.0793	31.381	27.044	22.667	18.546	14.788	11.519	8.817	6.711	5.007	3.803	2.892	2.224	1.717	1.354	1.078	0.854057	0.675781	0	8.40983	5.23174	28.0107	22.63	13.6569	8.29679	1.19641	-3.27875	-9.50764	-11.1448	0	0	0	0	0	0	0	63.5013	61.9708	61.8309
					3.00598	52.5246	31.616	27.129	22.93	18.709	14.906	11.617	8.819	6.777	5.059	3.794	2.88	2.206	1.711	1.342	1.049	0.841004	0.65625	0	8.4728	5.24819	28.3357	22.8289	13.7659	8.36738	1.19669	-3.311	-9.60638	-11.1184	0	0	0	0	0	0	0	64.1798	62.6494	62.5094
					3.02682	52.9662	31.995	27.443	23.1	18.921	15.001	11.738	8.924	6.766	5.083	3.831	2.935	2.214	1.704	1.339	1.058	0.832009	0.667969	0	8.57437	5.30893	28.5458	23.0876	13.8536	8.45453	1.21093	-3.30562	-9.65196	-11.2268	0	0	0	0	0	0	0	64.8514	63.3209	63.181
					3.04765	53.4047	31.757	27.473	22.906	18.78	14.972	11.651	8.884	6.745	5.021	3.777	2.85	2.192	1.666	1.286	1.017	0.821907	0.636719	0	8.51059	5.31473	28.3061	22.9155	13.8268	8.39187	1.20551	-3.29536	-9.53423	-11.0686	0	0	0	0	0	0	0	64.573	63.0425	62.9026
					3.06848	53.8405	32.229	27.69	23.304	19.02	15.209	11.902	9.038	6.786	5.1	3.835	2.899	2.233	1.692	1.316	1.037	0.826619	0.644531	0	8.63708	5.35671	28.7979	23.2084	14.0457	8.57265	1.2264	-3.3154	-9.68424	-11.2385	0	0	0	0	0	0	0	65.6067	64.0762	63.9363
					3.08932	54.2736	32.727	27.897	23.61	19.191	15.37	11.892	9.16	6.914	5.177	3.878	2.953	2.241	1.719	1.347	1.064	0.84644	0.648438	0	8.77054	5.39676	29.1761	23.4171	14.1944	8.56545	1.24296	-3.37793	-9.83045	-11.3646	0	0	0	0	0	0	0	66.1903	64.6598	64.5199
					3.11015	54.7043	32.912	28.304	23.825	19.383	15.508	12.109	9.209	6.972	5.239	3.923	2.981	2.255	1.747	1.354	1.064	0.832829	0.652344	0	8.82012	5.47549	29.4417	23.6513	14.3218	8.72175	1.24961	-3.40627	-9.94818	-11.4964	0	0	0	0	0	0	0	66.831	65.3005	65.1606
					3.13098	55.1329	33.223	28.52	24.007	19.741	15.66	12.178	9.274	7.055	5.264	3.959	2.986	2.291	1.749	1.356	1.067	0.836066	0.652344	0	8.90346	5.51728	29.6667	24.0882	14.4622	8.77145	1.25843	-3.44682	-9.99565	-11.6019	0	0	0	0	0	0	0	67.6232	66.0928	65.9529
					3.15182	55.5596	33.418	28.835	24.164	19.775	15.777	12.309	9.355	7.092	5.31	3.978	3.006	2.325	1.767	1.378	1.101	0.843481	0.65625	0	8.95572	5.57822	29.8607	24.1297	14.5702	8.8658	1.26942	-3.4649	-10.083	-11.6576	0	0	0	0	0	0	0	68.0242	66.4938	66.3539
					3.17265	55.9845	33.66	29.054	24.454	19.958	15.934	12.323	9.487	7.143	5.352	4.014	3.042	2.304	1.77	1.376	1.09	0.854581	0.652344	0	9.02058	5.62058	30.219	24.353	14.7152	8.87589	1.28733	-3.48981	-10.1628	-11.7631	0	0	0	0	0	0	0	68.6759	67.1455	67.0056
					3.19348	56.4078	34.144	29.373	24.506	20.166	16.075	12.449	9.604	7.211	5.397	4.039	3.068	2.35	1.793	1.393	1.106	0.862717	0.664062	0	9.15028	5.68229	30.2833	24.6068	14.8455	8.96664	1.30321	-3.52304	-10.2482	-11.8364	0	0	0	0	0	0	0	69.2303	67.6999	67.56
					3.21432	56.8299	34.409	29.515	24.919	20.293	16.152	12.568	9.67	7.281	5.423	4.068	3.099	2.361	1.833	1.429	1.105	0.855742	0.683594	0	9.2213	5.70977	30.7937	24.7617	14.9166	9.05235	1.31216	-3.55723	-10.2976	-11.9214	0	0	0	0	0	0	0	69.9914	68.4609	68.321
					3.23515	57.2509	34.735	29.848	25.111	20.462	16.273	12.718	9.716	7.331	5.529	4.106	3.129	2.39	1.824	1.419	1.132	0.882692	0.679688	0	9.30867	5.77419	31.0309	24.9679	15.0283	9.16039	1.3184	-3.58166	-10.4989	-12.0327	0	0	0	0	0	0	0	70.4756	68.9451	68.8052
					3.25598	57.671	35.059	30.187	25.309	20.735	16.499	12.792	9.8	7.385	5.531	4.157	3.162	2.428	1.866	1.431	1.136	0.911513	0.703125	0	9.3955	5.83977	31.2756	25.3011	15.237	9.21369	1.3298	-3.60805	-10.5026	-12.1822	0	0	0	0	0	0	0	71.2996	69.7691	69.6292
					3.27682	58.0904	35.283	30.376	25.594	20.845	16.574	12.919	9.875	7.417	5.579	4.191	3.171	2.379	1.847	1.431	1.139	0.878103	0.6875	0	9.45553	5.87633	31.6278	25.4353	15.3063	9.30517	1.33998	-3.62368	-10.5938	-12.2818	0	0	0	0	0	0	0	71.8471	70.3166	70.1767
					3.29765	58.5094	35.6	30.736	25.66	21.113	16.678	13.014	9.986	7.528	5.637	4.252	3.189	2.442	1.879	1.477	1.137	0.892781	0.683594	0	9.54048	5.94597	31.7093	25.7623	15.4023	9.37359	1.35504	-3.67791	-10.7039	-12.4606	0	0	0	0	0	0	0	72.2466	70.7162	70.5763
					3.31848	58.9282	35.898	30.984	25.951	21.137	16.9	13.166	10.035	7.583	5.658	4.268	3.215	2.44	1.879	1.455	1.148	0.887862	0.683594	0	9.62034	5.99395	32.0689	25.7916	15.6074	9.48307	1.36169	-3.70478	-10.7438	-12.5075	0	0	0	0	0	0	0	72.9709	71.4404	71.3005
					3.33932	59.347	36.453	31.187	26.249	21.274	17.109	13.242	10.124	7.611	5.707	4.264	3.248	2.463	1.889	1.462	1.162	0.895958	0.6875	0	9.76908	6.03322	32.4372	25.9587	15.8004	9.53782	1.37377	-3.71846	-10.8369	-12.4957	0	0	0	0	0	0	0	73.8591	72.3287	72.1888
					3.36015	59.766	36.53	31.561	26.462	21.562	17.214	13.321	10.221	7.697	5.752	4.368	3.332	2.49	1.9	1.478	1.164	0.902165	0.703125	0	9.78971	6.10557	32.7004	26.3102	15.8973	9.59472	1.38693	-3.76048	-10.9223	-12.8005	0	0	0	0	0	0	0	74.3016	72.7711	72.6312
					3.38098	60.1853	36.849	31.805	26.644	21.841	17.304	13.474	10.264	7.752	5.829	4.347	3.291	2.545	1.922	1.491	1.159	0.905184	0.695312	0	9.8752	6.15277	32.9253	26.6506	15.9805	9.70492	1.39276	-3.78735	-11.0685	-12.739	0	0	0	0	0	0	0	75.0872	73.5568	73.4168
					3.40182	60.6054	37.368	32.149	26.997	21.911	17.602	13.563	10.479	7.863	5.883	4.423	3.356	2.548	1.959	1.51	1.181	0.929332	0.722656	0	10.0143	6.21932	33.3615	26.736	16.2557	9.76902	1.42194	-3.84158	-11.1711	-12.9617	0	0	0	0	0	0	0	75.8035	74.273	74.1331
					3.42265	61.0262	37.698	32.391	27.227	22.178	17.712	13.729	10.486	7.927	5.917	4.46	3.383	2.573	1.964	1.557	1.205	0.939625	0.71875	0	10.1027	6.26614	33.6458	27.0618	16.3572	9.88859	1.42289	-3.87285	-11.2356	-13.0701	0	0	0	0	0	0	0	76.5666	75.0361	74.8962
					3.44348	61.4482	37.992	32.677	27.425	22.475	17.851	13.913	10.577	8.032	6.01	4.529	3.403	2.606	1.988	1.551	1.217	0.950819	0.726562	0	10.1815	6.32146	33.8904	27.4242	16.4856	10.0211	1.43524	-3.92415	-11.4122	-13.2723	0	0	0	0	0	0	0	77.1509	75.6205	75.4806
					3.46432	61.8714	38.488	32.884	27.741	22.605	17.965	13.991	10.633	8.066	6.154	4.502	3.458	2.611	1.995	1.557	1.22	0.967157	0.746094	0	10.3144	6.36151	34.2809	27.5828	16.5909	10.0773	1.44283	-3.94076	-11.6856	-13.1932	0	0	0	0	0	0	0	77.8312	76.3007	76.1608
					3.48515	62.2961	38.584	33.403	27.939	22.802	18.154	14.157	10.76	8.149	6.103	4.566	3.468	2.654	2.002	1.586	1.23	0.963078	0.75	0	10.3402	6.46191	34.5256	27.8232	16.7654	10.1969	1.46007	-3.98131	-11.5888	-13.3808	0	0	0	0	0	0	0	78.6224	77.092	76.9521
					3.50598	62.7226	39.125	33.67	28.152	23.078	18.332	14.284	10.876	8.297	6.17	4.64	3.525	2.686	2.054	1.609	1.263	0.991951	0.765625	0	10.4851	6.51356	34.7888	28.16	16.9298	10.2883	1.47581	-4.05362	-11.716	-13.5976	0	0	0	0	0	0	0	79.2743	77.7438	77.6039
					3.52683	63.1512	39.39	33.871	28.458	23.22	18.442	14.319	10.952	8.306	6.162	4.637	3.492	2.677	2.046	1.573	1.238	0.961381	0.75	0	10.5562	6.55245	35.167	28.3333	17.0314	10.3135	1.48612	-4.05801	-11.7008	-13.5888	0	0	0	0	0	0	0	80.0923	78.5618	78.4219
					3.54766	63.5817	39.788	34.27	28.856	23.449	18.693	14.558	11.073	8.427	6.252	4.74	3.577	2.733	2.085	1.646	1.299	1.005	0.777344	0	10.6628	6.62963	35.6588	28.6127	17.2632	10.4857	1.50254	-4.11713	-11.8717	-13.8907	0	0	0	0	0	0	0	80.9359	79.4054	79.2655
					3.5685	64.0145	40.084	34.509	29.045	23.625	18.923	14.741	11.227	8.471	6.357	4.811	3.615	2.78	2.148	1.656	1.32	1.025	0.804688	0	10.7422	6.67587	35.8924	28.8275	17.4756	10.6175	1.52344	-4.13863	-12.0711	-14.0987	0	0	0	0	0	0	0	81.4459	79.9155	79.7756
					3.58933	64.45	40.646	34.824	29.292	23.913	19.01	14.82	11.359	8.512	6.408	4.847	3.659	2.799	2.156	1.675	1.321	1.061	0.8125	0	10.8928	6.73681	36.1976	29.1789	17.556	10.6744	1.54135	-4.15866	-12.168	-14.2042	0	0	0	0	0	0	0	82.2469	80.7165	80.5766
					3.61016	64.8882	40.975	35.069	29.604	24.052	19.24	14.904	11.423	8.593	6.494	4.857	3.683	2.834	2.18	1.69	1.333	1.043	0.8125	0	10.9809	6.7842	36.5831	29.3485	17.7684	10.7349	1.55003	-4.19823	-12.3313	-14.2335	0	0	0	0	0	0	0	82.987	81.4566	81.3167
					3.631	65.3294	41.024	35.603	29.829	24.365	19.369	15.02	11.524	8.724	6.536	4.929	3.703	2.85	2.193	1.698	1.348	1.041	0.820312	0	10.9941	6.88751	36.8612	29.7304	17.8875	10.8185	1.56374	-4.26223	-12.411	-14.4445	0	0	0	0	0	0	0	83.6251	82.0946	81.9547
					3.65183	65.7739	41.572	35.816	30.038	24.55	19.564	15.241	11.564	8.865	6.577	4.96	3.762	2.878	2.21	1.729	1.358	1.067	0.824219	0	11.1409	6.92871	37.1195	29.9562	18.0676	10.9776	1.56917	-4.33112	-12.4889	-14.5354	0	0	0	0	0	0	0	84.4043	82.8738	82.7339
					3.67266	66.2218	41.904	36.12	30.373	24.715	19.693	15.351	11.721	8.855	6.634	5.007	3.79	2.897	2.236	1.736	1.369	1.08	0.84375	0	11.2299	6.98752	37.5334	30.1575	18.1867	11.0569	1.59047	-4.32623	-12.5971	-14.6731	0	0	0	0	0	0	0	85.1459	83.6155	83.4756
					3.6935	66.6733	42.263	36.734	30.503	25.031	19.988	15.468	11.814	8.986	6.7	5.042	3.826	2.914	2.247	1.769	1.416	1.083	0.839844	0	11.3261	7.1063	37.6941	30.5431	18.4592	11.1411	1.60309	-4.39024	-12.7224	-14.7757	0	0	0	0	0	0	0	85.9846	84.4542	84.3142
					3.71433	67.1287	42.551	36.975	30.802	25.184	20.052	15.611	11.889	9.021	6.781	5.087	3.845	2.979	2.262	1.766	1.41	1.095	0.859375	0	11.4033	7.15292	38.0636	30.7298	18.5183	11.2441	1.61327	-4.40734	-12.8762	-14.9076	0	0	0	0	0	0	0	86.5341	85.0036	84.8637
					3.73516	67.5882	43.134	37.041	31.165	25.476	20.219	15.714	12.031	9.079	6.868	5.094	3.918	2.961	2.303	1.802	1.423	1.101	0.855469	0	11.5595	7.16569	38.5121	31.0861	18.6725	11.3183	1.63253	-4.43567	-13.0414	-14.9281	0	0	0	0	0	0	0	87.5416	86.0112	85.8712
					3.756	68.052	43.556	37.625	31.412	25.68	20.403	15.875	12.143	9.204	6.896	5.173	3.93	3.027	2.333	1.809	1.428	1.148	0.875	0	11.6726	7.27867	38.8174	31.335	18.8424	11.4343	1.64773	-4.49674	-13.0946	-15.1596	0	0	0	0	0	0	0	88.2772	86.7467	86.6068
					3.77683	68.5203	43.794	37.817	31.745	25.828	20.608	15.973	12.234	9.189	6.946	5.238	3.948	3.018	2.316	1.811	1.429	1.113	0.875	0	11.7364	7.31581	39.2289	31.5156	19.0317	11.5049	1.66008	-4.48941	-13.1896	-15.3501	0	0	0	0	0	0	0	88.9643	87.4339	87.294
					3.79766	68.9934	44.344	38.124	31.953	26.016	20.757	16.178	12.368	9.289	6.982	5.272	3.983	3.042	2.329	1.821	1.459	1.153	0.875	0	11.8838	7.3752	39.4859	31.745	19.1693	11.6525	1.67826	-4.53827	-13.2579	-15.4497	0	0	0	0	0	0	0	89.7441	88.2137	88.0738
					3.8185	69.4714	44.733	38.256	32.373	26.356	20.904	16.258	12.481	9.416	7.047	5.286	4.029	3.049	2.371	1.838	1.449	1.156	0.898438	0	11.988	7.40074	40.0049	32.1599	19.3051	11.7101	1.6936	-4.60032	-13.3813	-15.4907	0	0	0	0	0	0	0	90.79	89.2596	89.1197
					3.83933	69.9545	45.075	38.798	32.638	26.624	21.056	16.461	12.547	9.49	7.105	5.345	4.083	3.083	2.395	1.87	1.561	1.169	0.917969	0	12.0797	7.50559	40.3324	32.4869	19.4455	11.8564	1.70255	-4.63647	-13.4915	-15.6636	0	0	0	0	0	0	0	91.6174	90.0869	89.947
					3.86016	70.4431	45.445	39.067	32.769	26.815	21.34	16.565	12.685	9.548	7.16	5.431	4.08	3.125	2.42	1.877	1.496	1.173	0.925781	0	12.1789	7.55763	40.4943	32.7199	19.7077	11.9313	1.72128	-4.66481	-13.5959	-15.9157	0	0	0	0	0	0	0	92.1346	90.6042	90.4643
					3.881	70.9372	45.755	39.596	33.241	26.993	21.435	16.633	12.757	9.683	7.217	5.43	4.111	3.163	2.445	1.885	1.495	1.184	0.914062	0	12.2619	7.65996	41.0776	32.9371	19.7955	11.9803	1.73105	-4.73077	-13.7041	-15.9127	0	0	0	0	0	0	0	93.0957	91.5653	91.4254
					3.90183	71.4371	46.302	39.89	33.268	27.304	21.727	16.788	12.882	9.803	7.297	5.472	4.184	3.187	2.445	1.908	1.517	1.188	0.960938	0	12.4085	7.71684	41.1109	33.3166	20.0651	12.0919	1.74801	-4.78939	-13.8561	-16.0358	0	0	0	0	0	0	0	93.7767	92.2462	92.1063
					3.92266	71.9431	46.715	40.211	33.72	27.486	21.866	16.968	12.99	9.763	7.369	5.532	4.201	3.217	2.458	1.928	1.501	1.191	0.925781	0	12.5192	7.77894	41.6695	33.5387	20.1935	12.2215	1.76267	-4.76985	-13.9928	-16.2116	0	0	0	0	0	0	0	94.7098	93.1793	93.0394
					3.9435	72.4552	47.047	40.731	33.922	27.682	22.016	17.186	13.084	9.926	7.433	5.581	4.246	3.279	2.491	1.947	1.553	1.206	0.945312	0	12.6082	7.87953	41.9191	33.7779	20.332	12.3786	1.77542	-4.84949	-14.1143	-16.3552	0	0	0	0	0	0	0	95.3517	93.8212	93.6813
					3.96433	72.9738	47.387	40.775	34.459	27.9	22.324	17.367	13.192	10.018	7.527	5.635	4.304	3.269	2.538	1.99	1.569	1.221	0.960938	0	12.6993	7.88805	42.5827	34.0439	20.6165	12.5089	1.79008	-4.89443	-14.2928	-16.5135	0	0	0	0	0	0	0	96.4287	94.8982	94.7583
					3.98516	73.4975	48.105	41.429	34.599	28.271	22.527	17.537	13.434	10.103	7.621	5.742	4.371	3.328	2.592	2.026	1.614	1.267	1.039	0	12.8917	8.01456	42.7557	34.4966	20.804	12.6314	1.82291	-4.93596	-14.4713	-16.827	0	0	0	0	0	0	0	97.1825	95.652	95.5121
					4.006	74.0253	48.381	41.671	34.999	28.442	22.673	17.662	13.532	10.243	7.709	5.811	4.377	3.384	2.616	2.106	1.613	1.285	1.016	0	12.9657	8.06138	43.25	34.7052	20.9388	12.7214	1.83621	-5.00436	-14.6384	-17.0293	0	0	0	0	0	0	0	97.8067	96.2762	96.1363
					4.02683	74.5575	48.947	41.936	35.226	28.743	22.781	17.817	13.588	10.28	7.738	5.824	4.428	3.385	2.624	2.045	1.628	1.278	1	0	13.1174	8.11265	43.5305	35.0725	21.0385	12.8331	1.84381	-5.02244	-14.6935	-17.0673	0	0	0	0	0	0	0	98.7652	97.2347	97.0948
					4.04766	75.0939	49.082	42.494	35.44	28.912	23.055	17.891	13.749	10.328	7.785	5.849	4.46	3.379	2.612	2.052	1.624	1.295	0.992188	0	13.1535	8.22059	43.795	35.2787	21.2916	12.8864	1.86566	-5.04589	-14.7827	-17.1406	0	0	0	0	0	0	0	99.5222	97.9917	97.8518
					4.0685	75.6346	49.743	42.549	35.872	29.216	23.195	18.091	13.796	10.49	7.832	5.886	4.484	3.409	2.626	2.078	1.642	1.284	0.996094	0	13.3307	8.23123	44.3288	35.6497	21.4209	13.0304	1.87203	-5.12504	-14.8719	-17.249	0	0	0	0	0	0	0	100.618	99.0872	98.9473
					4.08933	76.1797	50.081	43.105	36.114	29.42	23.446	18.176	13.885	10.546	7.845	5.955	4.551	3.43	2.644	2.072	1.654	1.28	0.988281	0	13.4213	8.33879	44.6279	35.8986	21.6527	13.0916	1.88411	-5.1524	-14.8966	-17.4512	0	0	0	0	0	0	0	101.415	99.8842	99.7443
					4.11016	76.7291	50.441	43.408	36.43	29.627	23.633	18.451	14.05	10.619	7.961	5.994	4.551	3.482	2.703	2.089	1.654	1.303	1.008	0	13.5177	8.39741	45.0184	36.1512	21.8254	13.2897	1.9065	-5.18806	-15.1169	-17.5655	0	0	0	0	0	0	0	102.236	100.705	100.565
					4.131	77.2829	50.836	43.975	36.657	29.986	23.803	18.597	14.182	10.745	8.007	6.082	4.604	3.53	2.717	2.128	1.698	1.313	1.039	0	13.6236	8.5071	45.2989	36.5892	21.9824	13.3949	1.92441	-5.24962	-15.2043	-17.8234	0	0	0	0	0	0	0	103.043	101.513	101.373
					4.15183	77.841	51.395	44.231	36.88	30.125	24.038	18.673	14.312	10.797	8.094	6.096	4.657	3.543	2.736	2.149	1.701	1.349	1.086	0	13.7734	8.55662	45.5745	36.7588	22.1994	13.4496	1.94205	-5.27503	-15.3695	-17.8644	0	0	0	0	0	0	0	103.745	102.215	102.075
					4.17266	78.4036	51.745	44.292	37.318	30.472	24.202	18.754	14.41	10.926	8.132	6.17	4.656	3.565	2.757	2.164	1.705	1.344	1.039	0	13.8672	8.56842	46.1157	37.1822	22.3508	13.5079	1.95535	-5.33805	-15.4416	-18.0813	0	0	0	0	0	0	0	104.687	103.156	103.016
					4.19351	78.9709	52.118	44.884	37.544	30.677	24.479	18.894	14.609	10.991	8.235	6.208	4.745	3.591	2.777	2.182	1.703	1.339	1.063	0	13.9672	8.68294	46.395	37.4324	22.6067	13.6088	1.98235	-5.36981	-15.6372	-18.1927	0	0	0	0	0	0	0	105.476	103.945	103.805
					4.21434	79.5423	52.663	45.119	37.789	30.971	24.612	19.098	14.566	11.072	8.316	6.251	4.757	3.629	2.807	2.198	1.729	1.369	1.078	0	14.1132	8.72841	46.6978	37.7911	22.7295	13.7557	1.97652	-5.40938	-15.791	-18.3187	0	0	0	0	0	0	0	106.273	104.743	104.603
					4.23517	80.1182	53.098	45.71	38.046	31.145	24.798	19.366	14.696	11.172	8.329	6.308	4.765	3.645	2.835	2.224	1.737	1.374	1.094	0	14.2298	8.84274	47.0153	38.0034	22.9013	13.9487	1.99416	-5.45824	-15.8157	-18.4857	0	0	0	0	0	0	0	107.176	105.645	105.505
					4.25601	80.6985	53.472	45.801	38.628	31.381	25.047	19.424	14.849	11.202	8.485	6.314	4.823	3.671	2.817	2.209	1.749	1.372	1.094	0	14.33	8.86034	47.7346	38.2914	23.1312	13.9905	2.01492	-5.47289	-16.1119	-18.5033	0	0	0	0	0	0	0	108.265	106.734	106.595
					4.27684	81.2834	53.781	46.307	38.856	31.685	25.197	19.53	14.999	11.307	8.479	6.384	4.858	3.731	2.873	2.225	1.774	1.395	1.094	0	14.4128	8.95823	48.0163	38.6624	23.2697	14.0669	2.03527	-5.52419	-16.1005	-18.7084	0	0	0	0	0	0	0	109.088	107.558	107.418
					4.29767	81.8727	54.445	46.625	39.032	31.89	25.489	19.655	15.098	11.381	8.598	6.455	4.888	3.765	2.876	2.271	1.777	1.401	1.102	0	14.5908	9.01975	48.2338	38.9125	23.5394	14.1569	2.04871	-5.56035	-16.3265	-18.9165	0	0	0	0	0	0	0	109.698	108.168	108.028
					4.31851	82.4666	54.543	47.147	39.39	32.086	25.508	19.891	15.245	11.44	8.658	6.473	4.961	3.76	2.913	2.266	1.819	1.409	1.109	0	14.617	9.12073	48.6762	39.1517	23.5569	14.3269	2.06866	-5.58917	-16.4404	-18.9693	0	0	0	0	0	0	0	110.519	108.989	108.849
					4.33934	83.0651	55.19	47.491	39.672	32.322	25.783	20.121	15.257	11.573	8.712	6.539	4.988	3.824	2.925	2.305	1.826	1.417	1.117	0	14.7904	9.18728	49.0247	39.4396	23.8109	14.4926	2.07028	-5.65415	-16.543	-19.1627	0	0	0	0	0	0	0	111.456	109.926	109.786
					4.36017	83.6681	55.667	47.577	40.161	32.502	26.073	20.233	15.413	11.631	8.808	6.585	4.973	3.835	2.947	2.303	1.833	1.439	1.117	0	14.9183	9.20391	49.629	39.6593	24.0787	14.5732	2.09145	-5.68249	-16.7252	-19.2975	0	0	0	0	0	0	0	112.449	110.918	110.778
					4.38101	84.2757	55.913	48.112	40.438	32.861	26.212	20.259	15.568	11.759	8.857	6.626	5.06	3.948	2.973	2.331	1.835	1.435	1.125	0	14.9842	9.30741	49.9713	40.0973	24.2071	14.5919	2.11248	-5.74502	-16.8183	-19.4176	0	0	0	0	0	0	0	113.291	111.76	111.62
					4.40184	84.8879	56.438	48.356	40.619	33.198	26.372	20.477	15.656	11.841	8.902	6.696	5.101	3.876	3.012	2.352	1.855	1.455	1.141	0	15.1249	9.35461	50.1949	40.5085	24.3549	14.749	2.12443	-5.78509	-16.9037	-19.6228	0	0	0	0	0	0	0	114.1	112.569	112.429
					4.42267	85.5047	56.854	48.941	40.888	33.341	26.507	20.67	15.796	11.886	8.992	6.742	5.104	3.921	3.003	2.393	1.853	1.459	1.141	0	15.2364	9.46778	50.5273	40.683	24.4795	14.888	2.14342	-5.80707	-17.0746	-19.7576	0	0	0	0	0	0	0	114.786	113.256	113.116
					4.44351	86.1261	57.17	49.242	41.122	33.691	26.63	20.862	15.866	11.942	9.034	6.822	5.155	3.907	3.042	2.388	1.854	1.457	1.156	0	15.321	9.52601	50.8165	41.1101	24.5931	15.0263	2.15292	-5.83443	-17.1544	-19.992	0	0	0	0	0	0	0	115.565	114.035	113.895
					4.46434	86.7523	57.556	49.543	41.584	33.826	26.908	20.955	15.952	12.075	9.082	6.823	5.182	3.962	3.054	2.381	1.883	1.5	1.148	0	15.4245	9.58424	51.3874	41.2748	24.8499	15.0933	2.16459	-5.89941	-17.2455	-19.9949	0	0	0	0	0	0	0	116.639	115.108	114.968
					4.48517	87.3831	58.17	49.823	41.822	34.14	27.046	21.072	16.037	12.167	9.173	6.859	5.202	3.977	3.074	2.383	1.873	1.491	1.141	0	15.589	9.63841	51.6815	41.658	24.9773	15.1775	2.17612	-5.94436	-17.4183	-20.1004	0	0	0	0	0	0	0	117.435	115.904	115.764
					4.50601	88.0186	58.264	50.351	42.072	34.324	27.35	21.196	16.221	12.246	9.138	6.927	5.23	4.015	3.082	2.406	1.887	1.487	1.148	0	15.6142	9.74055	51.9905	41.8825	25.2581	15.2668	2.20109	-5.98295	-17.3519	-20.2997	0	0	0	0	0	0	0	118.319	116.789	116.649
					4.52684	88.6588	58.895	50.662	42.311	34.699	27.464	21.316	16.257	12.318	9.279	6.963	5.267	4.062	3.105	2.436	1.9	1.499	1.164	0	15.7833	9.80072	52.2858	42.3401	25.3633	15.3533	2.20598	-6.01813	-17.6196	-20.4052	0	0	0	0	0	0	0	119.09	117.559	117.419
					4.54767	89.3037	59.202	50.95	42.552	34.81	27.725	21.418	16.414	12.38	9.372	6.992	5.283	4.067	3.128	2.444	1.916	1.51	1.172	0	15.8656	9.85643	52.5836	42.4755	25.6044	15.4267	2.22728	-6.04842	-17.7962	-20.4902	0	0	0	0	0	0	0	119.705	118.174	118.034
					4.56851	89.9534	59.574	51.493	42.787	35.208	27.872	21.524	16.607	12.469	9.421	7.034	5.369	4.082	3.156	2.456	1.94	1.529	1.172	0	15.9653	9.96148	52.874	42.9612	25.7401	15.5031	2.25347	-6.0919	-17.8893	-20.6133	0	0	0	0	0	0	0	120.664	119.134	118.994
					4.58934	90.6079	60.204	51.56	43.294	35.268	28.046	21.757	16.66	12.574	9.461	7.104	5.397	4.12	3.191	2.483	1.952	1.517	1.203	0	16.1341	9.97444	53.5006	43.0344	25.9008	15.6709	2.26066	-6.1432	-17.9652	-20.8184	0	0	0	0	0	0	0	121.549	120.019	119.879
					4.61017	91.2672	60.279	52.076	43.517	35.711	28.193	21.984	16.67	12.686	9.45	7.191	5.448	4.147	3.179	2.471	1.959	1.546	1.195	0	16.1542	10.0743	53.7761	43.5749	26.0366	15.8344	2.26202	-6.19792	-17.9443	-21.0734	0	0	0	0	0	0	0	122.497	120.966	120.827
					4.63101	91.9312	60.923	52.39	43.769	35.84	28.426	22.103	16.822	12.734	9.517	7.192	5.465	4.127	3.236	2.506	1.966	1.541	1.211	0	16.3268	10.135	54.0875	43.7323	26.2518	15.9201	2.28264	-6.22137	-18.0715	-21.0763	0	0	0	0	0	0	0	123.367	121.837	121.697
					4.65184	92.6001	61.253	52.934	44.249	35.958	28.585	22.243	16.878	12.873	9.606	7.246	5.489	4.164	3.239	2.518	1.993	1.557	1.227	0	16.4153	10.2402	54.6807	43.8763	26.3986	16.021	2.29024	-6.28928	-18.2405	-21.2345	0	0	0	0	0	0	0	124.158	122.627	122.488
					4.67267	93.2739	61.58	53.204	44.466	36.096	28.761	22.451	17.041	12.934	9.626	7.295	5.506	4.231	3.258	2.54	2.01	1.575	1.227	0	16.5029	10.2925	54.9489	44.0447	26.5611	16.1708	2.31236	-6.31909	-18.2785	-21.3781	0	0	0	0	0	0	0	124.857	123.327	123.187
					4.69351	93.9525	62.21	53.482	44.718	36.441	28.983	22.416	17.208	12.983	9.693	7.336	5.54	4.24	3.251	2.547	2.037	1.577	1.227	0	16.6717	10.3463	55.2603	44.4657	26.7661	16.1456	2.33502	-6.34303	-18.4057	-21.4983	0	0	0	0	0	0	0	125.744	124.213	124.073
					4.71434	94.6359	62.549	53.788	45.177	36.526	29.131	22.654	17.354	13.029	9.869	7.346	5.61	4.256	3.299	2.595	2.05	1.578	1.25	0	16.7626	10.4054	55.8275	44.5694	26.9028	16.317	2.35483	-6.3655	-18.7399	-21.5276	0	0	0	0	0	0	0	126.506	124.976	124.836
					4.73517	95.3243	62.875	54.075	45.438	36.9	29.292	22.785	17.445	13.126	9.912	7.418	5.644	4.301	3.336	2.654	2.034	1.603	1.258	0	16.8499	10.461	56.15	45.0257	27.0515	16.4114	2.36718	-6.41289	-18.8216	-21.7386	0	0	0	0	0	0	0	127.344	125.813	125.673
					4.75601	96.0176	63.474	54.346	45.671	37.045	29.543	22.89	17.585	13.246	9.936	7.443	5.669	4.326	3.348	2.613	2.074	1.614	1.25	0	17.0105	10.5134	56.4379	45.2027	27.2833	16.487	2.38618	-6.47152	-18.8672	-21.8119	0	0	0	0	0	0	0	128.17	126.64	126.5
					4.77684	96.7159	63.821	54.893	45.889	37.427	29.682	23.12	17.583	13.298	9.96	7.514	5.715	4.322	3.368	2.635	2.076	1.623	1.266	0	17.1035	10.6192	56.7073	45.6688	27.4117	16.6526	2.38591	-6.49692	-18.9127	-22.0199	0	0	0	0	0	0	0	129.119	127.589	127.449
					4.79767	97.4191	64.329	55.173	46.094	37.717	29.832	23.21	17.648	13.424	10.016	7.583	5.735	4.388	3.398	2.657	2.084	1.663	1.281	0	17.2396	10.6734	56.9607	46.0227	27.5502	16.7175	2.39473	-6.55848	-19.0191	-22.2221	0	0	0	0	0	0	0	129.759	128.229	128.089
					4.81851	98.1272	64.992	55.465	46.345	37.862	30.103	23.342	17.865	13.44	10.182	7.616	5.807	4.432	3.421	2.666	2.097	1.658	1.297	0	17.4173	10.7299	57.2708	46.1996	27.8005	16.8125	2.42417	-6.5663	-19.3343	-22.3188	0	0	0	0	0	0	0	130.435	128.905	128.765
					4.83934	98.8404	64.563	55.956	46.566	38.162	30.227	23.421	17.964	13.548	10.154	7.687	5.811	4.415	3.444	2.686	2.11	1.667	1.313	0	17.3023	10.8249	57.5439	46.5657	27.915	16.8694	2.43761	-6.61907	-19.2811	-22.5269	0	0	0	0	0	0	0	131.032	129.501	129.361
					4.86017	99.5586	65.361	56.248	46.769	38.302	30.387	23.652	18.012	13.686	10.197	7.749	5.816	4.479	3.456	2.691	2.135	1.687	1.305	0	17.5162	10.8813	57.7948	46.7365	28.0628	17.0358	2.44412	-6.68649	-19.3628	-22.7086	0	0	0	0	0	0	0	131.714	130.183	130.043
					4.88102	100.282	65.938	56.466	47.195	38.251	30.599	23.737	18.038	13.715	10.279	7.749	5.853	4.499	3.473	2.71	2.133	1.668	1.297	0	17.6708	10.9235	58.3212	46.6743	28.2585	17.097	2.44765	-6.70066	-19.5185	-22.7086	0	0	0	0	0	0	0	132.465	130.935	130.795
					4.90185	101.01	66.092	56.998	47.44	38.718	30.724	23.844	18.171	13.779	10.325	7.786	5.922	4.505	3.494	2.734	2.156	1.68	1.336	0	17.7121	11.0264	58.624	47.2441	28.374	17.1741	2.4657	-6.73192	-19.6058	-22.817	0	0	0	0	0	0	0	133.466	131.935	131.795
					4.92269	101.745	66.204	57.033	47.923	38.83	30.998	23.934	18.301	13.868	10.39	7.819	5.944	4.548	3.494	2.728	2.155	1.71	1.344	0	17.7421	11.0332	59.2208	47.3808	28.627	17.2389	2.48334	-6.77541	-19.7293	-22.9137	0	0	0	0	0	0	0	134.308	132.777	132.637
					4.94352	102.498	66.999	57.353	48.188	39.042	31.179	24.219	18.495	13.961	10.525	7.96	6.018	4.599	3.663	2.805	2.204	1.755	1.398	0	17.9551	11.0951	59.5483	47.6394	28.7942	17.4442	2.50966	-6.82084	-19.9856	-23.3269	0	0	0	0	0	0	0	134.853	133.322	133.182
					4.96435	103.271	67.09	57.897	48.421	39.449	31.367	24.26	18.721	14.078	10.712	8.028	6.144	4.674	3.615	2.847	2.279	1.793	1.422	0	17.9795	11.2003	59.8363	48.1361	28.9678	17.4738	2.54033	-6.878	-20.3407	-23.5262	0	0	0	0	0	0	0	135.389	133.859	133.719
					4.98519	104.064	67.819	58.161	48.646	39.587	31.514	24.614	18.642	14.202	10.71	8.066	6.184	4.715	3.66	2.866	2.272	1.804	1.43	0	18.1749	11.2514	60.1143	48.3045	29.1036	17.7287	2.52961	-6.93859	-20.3369	-23.6376	0	0	0	0	0	0	0	136.294	134.763	134.624
					5.00602	104.876	67.772	58.355	48.788	39.767	31.725	24.569	18.848	14.232	10.733	8.073	6.167	4.745	3.705	2.883	2.268	1.79	1.422	0	18.1623	11.2889	60.2898	48.5241	29.2984	17.6963	2.55756	-6.95324	-20.3806	-23.6581	0	0	0	0	0	0	0	136.825	135.295	135.155
					5.02685	105.705	68.258	58.579	49.205	39.788	31.818	24.638	18.966	14.278	10.812	8.063	6.197	4.731	3.711	2.888	2.268	1.811	1.445	0	18.2925	11.3323	60.8051	48.5497	29.3843	17.746	2.57357	-6.97572	-20.5306	-23.6288	0	0	0	0	0	0	0	137.548	136.018	135.878
					5.04769	106.551	68.318	58.8	49.425	40.095	31.934	24.845	18.893	14.4	10.813	8.208	6.237	4.752	3.712	2.919	2.306	1.83	1.445	0	18.3086	11.375	61.0769	48.9243	29.4914	17.8951	2.56367	-7.03532	-20.5325	-24.0537	0	0	0	0	0	0	0	138.014	136.483	136.343
					5.06852	107.413	68.628	59.235	49.291	40.297	32.087	24.906	19.096	14.416	10.829	8.19	6.28	4.772	3.71	2.906	2.298	1.821	1.438	0	18.3917	11.4592	60.9114	49.1708	29.6327	17.939	2.59121	-7.04314	-20.5629	-24.001	0	0	0	0	0	0	0	138.489	136.959	136.819
					5.08935	108.29	69.373	59.474	49.508	40.686	32.073	25.018	19.25	14.482	10.929	8.227	6.273	4.793	3.734	2.915	2.323	1.834	1.438	0	18.5913	11.5054	61.1795	49.6455	29.6198	18.0197	2.61211	-7.07538	-20.7528	-24.1094	0	0	0	0	0	0	0	139.236	137.705	137.565
[truncated: 423 more rows]
[truncated: 32 more columns]

## Sheet: Clone B-5 (Validation set)
CLONE B-5			toff	VCCoff	t	VCC	FG_Perm_1 pF/cm	FG_Perm_2 pF/cm	FG_Perm_3 pF/cm	FG_Perm_4 pF/cm	FG_Perm_5 pF/cm	FG_Perm_6 pF/cm	FG_Perm_7 pF/cm	FG_Perm_8 pF/cm	FG_Perm_9 pF/cm	FG_Perm_10 pF/cm	FG_Perm_11 pF/cm	FG_Perm_12 pF/cm	FG_Perm_13 pF/cm	FG_Perm_14 pF/cm	FG_Perm_15 pF/cm	FG_Perm_16 pF/cm	FG_Perm_17 pF/cm	Intercept	FQ1	FQ2	FQ3	FQ4	FQ5	FQ6	FQ7	FQ8	FQ9	FQ10	FQ11	FQ12	FQ13	FQ14	FQ15	FQ16	FQ17	premodel1	premodel2	Clone B model	Yoffset1 (d1)	Yoffset2 (d2)	k at beginning	set this factor	RMSE (VCC) PLS
[truncated: 1,626 more rows]
[truncated: 32 more columns]

[truncated: 6 more sheets: Clone C-1 (Validation set), Clone D-2 (Validation set), Heatmap B-1, Heatmap B-5, Heatmap A-1, Heatmap A-7]
